# Supplementary material
Source: MDPI journal article supplement (https://www.mdpi.com/2218-0532/90/3/48)
Supplement: s1 [file s1]

# Uncovering Streptomyces-derived compounds as cosmeceuticals for the development of improved skin photoprotection products: an in-silico approach to explore multi-targeted agents

Jeysson Sánchez-Suárez <sup>1,2</sup>, Luisa Villamil <sup>1</sup>, Luis Díaz <sup>1,2,\*</sup>, and Ericsson Coy-Barrera <sup>3,\*</sup>

<sup>1</sup> Doctorate in Biosciences, School of Engineering, Universidad de La Sabana, 250001 Chía, Cundinamarca, Colombia

<sup>2</sup> Bioprospecting Research Group, School of Engineering, Universidad de La Sabana, 250001 Chía, Cundinamarca, Colombia

<sup>3</sup> Bioorganic Chemistry Laboratory, Universidad Militar Nueva Granada, Cajicá 250247, Colombia

\* Correspondence: luis.diaz1@unisabana.edu.co (L.D.); ericsson.coy@unimilitar.edu.co (E.C.-B.)

**Table S1.** Clustering of the 1981 selected compounds by *Flexophore* descriptor.

| Comp No <sup>a</sup> | Name                                                                                  | SMILES <sup>b</sup>                                                                                                                         | Cluster No <sup>c</sup> | Rep <sup>d</sup> |
|----------------------|---------------------------------------------------------------------------------------|---------------------------------------------------------------------------------------------------------------------------------------------|-------------------------|------------------|
| 1                    | Clorobiocin                                                                           | <chem>CO[C@H]1[C@H](OC(=O)c2ccc([nH]2)C)[C@@H](O)[C@@H](OC1(C)C)Oc1ccc2c(c1Cl)oc(=O)c(c2O)NC(=O)c1ccc(c1)CC=C(C)C)O</chem>                  | 1                       | Yes              |
| 2                    | 2,2,4-Trimethyl-5,8-dihydroxy-6-isopentyl-2,7-dihydroanthra[9,1-de][1,3]oxazine-7-one | <chem>CC(CCC1=C2C3C(=C(C1=O)C)OC(Nc3c1=CC=CC(=O)c1c2O)(C)C)C</chem>                                                                         | 2                       | Yes              |
| 3                    | RK-682                                                                                | <chem>CCCCCCCCCCCCCCCC(=O)C1=C(O)[C@H](OC1=O)CO</chem>                                                                                      | 3                       | Yes              |
| 4                    | Spindomycin B                                                                         | <chem>O=C1C(=C(C)[C@@]2(C3=C1CCC3)c1ccccc1N(C2=O)C)O</chem>                                                                                 | 4                       | Yes              |
| 5                    | Spindomycin A                                                                         | <chem>O=C1[C@H](O)[C@@H](C)[C@@]2(C3=C1CCC3)c1ccccc1N(C2=O)C</chem>                                                                         | 4                       | No               |
| 6                    | Aestivophenin C                                                                       | <chem>CC(=CCn1c2cccc(c2[nH]c2c1cccc2CC=C(C)C)C(=O)O[C@@H]1O[C@H](C)[C@@H]([C@H]([C@H]1O)O)O)C</chem>                                        | 5                       | No               |
| 7                    | Aminotrihydroxybacteri ohopane                                                        | <chem>NC[C@@H]([C@@H]([C@@H](CCC([C@H]1CCC2C1CC[C@@]1(C2CCC2[C@@]1(C)CCC1[C@]2(C)CCCC1(C)C)C)C)O)O)O</chem>                                 | 5                       | No               |
| 8                    | Aminotrihydroxybacteri ohopene                                                        | <chem>NC[C@@H]([C@@H]([C@@H](CCC([C@H]1CC[C@]2([C@H]1CC[C@]1([C@@H]2CC[C@H]2[C@@]1(C)CC[C@H]1[C@]2(C)CCCC1(C)C)C)C)O)O)O</chem>             | 5                       | Yes              |
| 9                    | LMPR04000005                                                                          | <chem>NC[C@@H]([C@@H]([C@@H](CCC(C1CC[C@]2(C1CC[C@@]1(C2CCC2[C@@]1(C)CCC1[C@]2(C)CCCC1(C)C)C)C)O)O)O</chem>                                 | 5                       | No               |
| 10                   | Mansouramycin D                                                                       | <chem>CNC1=CC(=O)c2c(C1=O)cnc(c2)c1c[nH]c2c1cccc2</chem>                                                                                    | 6                       | Yes              |
| 11                   | Peptidinnamin E                                                                       | <chem>CC/C=C/Cc1cccc1/C=C/C(=O)N[C@@H](C(=O)[C@@](N(C(=O)[C@H](Cc1ccc(c1Cl)O)OC)NC)C)(C(=O)OC[C@H]1NC(=O)CNC1=O)Cc1cccc1Cc1ccc(cc1)O</chem> | 7                       | Yes              |
| 12                   | Norcodeine                                                                            | <chem>COc1ccc2c3c1OC1C43CCNC(C2)C4C=CC1O</chem>                                                                                             | 8                       | Yes              |
| 13                   | Coelimycin P1                                                                         | <chem>C/C=C/C(=O)C1=C/C(=C/2\NCCC=C2)/SC[C@@H](C(=O)O1)NC(=O)C</chem>                                                                       | 9                       | Yes              |
| 14                   | C12392                                                                                | <chem>Cc1cc(O)c2c(c1)C(N)C1=C2C(=O)c2c(C1=O)c(O)ccc2</chem>                                                                                 | 10                      | Yes              |
| 15                   | Hatamarubigin E                                                                       | <chem>C[C@@H]1C[C@H](O)C2=C(C1)C=CC1C2C(=O)c2c(C1=O)c(O)ccc2O</chem>                                                                        | 10                      | No               |
| 16                   | Kinobscurinone                                                                        | <chem>Cc1cc(O)c2c(c1)c(=O)c1=c2c(=O)c2c(c1=O)c(O)ccc2</chem>                                                                                | 10                      | No               |
| 17                   | Prekinamycin                                                                          | <chem>N#Cn1c2cc(C)cc(c2c2c1C(=O)c1c(O)cccc1C2=O)O</chem>                                                                                    | 10                      | No               |
| 18                   | Frenolicin B                                                                          | <chem>CCC[C@H]1O[C@@H]2CC(=O)O[C@@H]2C2=C1C(=O)c1c(C2=O)cccc1O</chem>                                                                       | 10                      | No               |
| 19                   | BU-4704                                                                               | <chem>C#[N+]/C(=C)lc1ccc(cc1)OS(=O)(=O)O/C(=C/c1ccc(cc1)OC)/[N+]#C</chem>                                                                   | 11                      | Yes              |
| 20                   | Dechlororoseophilin                                                                   | <chem>COc1cc(oc1C1=C2N=C3C=C2C(C1CCCCCCCC3)(C)C)c1ccc[nH]1</chem>                                                                           | 12                      | Yes              |
| 21                   | Camporidine B                                                                         | <chem>CCCCC[C@H]1CN(O)[C@@H]2[C@]3([C@@H]1O3)C(=C/C=C/C(=O)O)C=C2</chem>                                                                    | 13                      | Yes              |
| 22                   | Neopentalenolactone D                                                                 | <chem>O=C1O[C@@H](C)[C@@]23[C@H](C1)C(=C[C@@H]3CC(C2)(C)C)C(=O)O</chem>                                                                     | 14                      | No               |
| 23                   | Pentalenolactone D                                                                    | <chem>O=C1OC[C@@H]2[C@@]3([C@@H]1C)CC(C[C@H]3C=C2C(=O)O)(C)C</chem>                                                                         | 14                      | No               |
| 24                   | 1-Deoxy-11-oxopentalenic acid                                                         | <chem>O=C1C[C@@H]2[C@@]3([C@@H]1C)CC(C[C@H]3C=C2C(=O)O)(C)C</chem>                                                                          | 14                      | No               |
| 25                   | Pentalenic acid                                                                       | <chem>OC(=O)C1=C[C@H]2[C@@]3([C@H]1CC[C@H]3C)CC([C@@H]2O)(C)C</chem>                                                                        | 14                      | No               |

| Comp No <sup>a</sup> | Name                                                                      | SMILES <sup>b</sup>                                                                                | Cluster No <sup>c</sup> | Rep <sup>d</sup> |
|----------------------|---------------------------------------------------------------------------|----------------------------------------------------------------------------------------------------|-------------------------|------------------|
| 26                   | 1-Deoxy-11beta-hydroxypentalenic acid                                     | <chem>O[C@@H]1C[C@@H]2[C@@]3([C@H]1C)CC(C[C@H]3C=C2C(=O)O)(C)C</chem>                              | 14                      | Yes              |
| 27                   | Isofuranonaphthoquinone G                                                 | <chem>O=C1NC2(Nc3c1cccc3)c1coc(c1C(=O)c1c2cc(O)c(c1O)O)C</chem>                                    | 15                      | Yes              |
| 28                   | Lorneic acid H                                                            | <chem>OCc1cc(C)ccc1/C=C/CCCC(=O)O</chem>                                                           | 16                      | Yes              |
| 29                   | 2-Methyl-8-hydroxybenzeneheptanoic acid                                   | <chem>OC(=O)CCCC[C@@H](c1cccc1C)O</chem>                                                           | 16                      | No               |
| 30                   | Ketomemycin B5                                                            | <chem>CC(=O)N[C@H](C(=O)C[C@H](C(=O)O)Cc1cccc1)Cc1ccc(cc1)O</chem>                                 | 17                      | Yes              |
| 31                   | Ketomemycin B6                                                            | <chem>CC(=O)N[C@H](C(=O)C[C@H](C(=O)O)Cc1cccc1)Cc1cccc1</chem>                                     | 18                      | Yes              |
| 32                   | Jomthonic acid F                                                          | <chem>C/C=C(/C=C/C(=O)NC(Cc1cccc1)C)C(=O)O)\C</chem>                                               | 18                      | No               |
| 33                   | Streptenol E                                                              | <chem>C/C=C/CCC(=O)CC(CCNC(=O)C)O</chem>                                                           | 19                      | Yes              |
| 34                   | N1-Acetyl-N7-O-hydroxyphenylacetyl cadaverine                             | <chem>O=C(Cc1cccc1O)NCCCCNC(=O)C</chem>                                                            | 19                      | No               |
| 35                   | Phaeochromycin F                                                          | <chem>Cc1cc(=O)c2c(o1)cccc2Cc1cc(O)c(c(=O)o1)Cc1c(O)cc(oc1=O)Cc1cccc2c1c(=O)cc(o2)C</chem>         | 20                      | Yes              |
| 36                   | N-Butylbenzenesulfonamide                                                 | <chem>CCCCNS(=O)(=O)c1cccc1</chem>                                                                 | 21                      | Yes              |
| 37                   | Sceliphrolactam                                                           | <chem>O=C1NCC(C)/C=C/C=C/C=C(\C)/C=C/C=C(=O)C(C(C(/C=C/C=C(/C=C/C(\C1)/O)\C)O)O)O</chem>           | 22                      | Yes              |
| 38                   | 2-Amino-9,13-dimethylheptadecanoic acid                                   | <chem>CCCC(CCCC(CCCCCC(C(=O)O)N)C)C</chem>                                                         | 23                      | Yes              |
| 39                   | Cis-[2,(4,5-dihydroxy-4-methylhexyl)cyclopropyl]acetic acid               | <chem>OC(=O)CC1CC1CCCC(C(O)C)(O)C</chem>                                                           | 24                      | Yes              |
| 40                   | (+)-Austrosene                                                            | <chem>OC(=O)c1ccc(cc1)[C@](CCCC(O)(C)C)(O)C</chem>                                                 | 25                      | Yes              |
| 41                   | Lobocompactol                                                             | <chem>C/C1=C\CCC(=C)[C@@H](CC(CC1)C1=CCC(OC1)C(O)(C)C)O</chem>                                     | 26                      | Yes              |
| 42                   | Akashin A                                                                 | <chem>O[C@@H]1[C@@H](O)[C@H](N)[C@H](O[C@@H]1n1c(C2=Nc3c(C2=O)cc(cc3)Cl)c(c2c1ccc(c2)Cl)O)C</chem> | 27                      | Yes              |
| 43                   | N,N'-((1Z,3Z)-1,4-bis(4-Methoxyphenyl)buta-1,3-diene-2,3-diyl)diформamide | <chem>COc1ccc(cc1)/C=C(/C(=C/c1ccc(cc1)OC)/NCC=O)\NCC=O</chem>                                     | 28                      | Yes              |
| 44                   | A80915g                                                                   | <chem>CC(=CCC12OC2(CC=C(C)C)C(=O)c2c(C1=O)cc(O)cc2O)CCC=C(C)C</chem>                               | 29                      | Yes              |
| 45                   | Napyradiomycin A3                                                         | <chem>C/C(=C\C[C@]12OC(C)(C)[C@@H](C=C1C(=O)c1c(C2=O)cc(cc1O)O)/CCC(C(=C)C)O</chem>                | 29                      | No               |
| 46                   | Merochlorin B                                                             | <chem>CC(=CCC[C@]1(C)OC2=C(Cl)C(=O)c3c([C@@]42[C@H]1CC(=C(C)C)C4)cc(O)cc3O)C</chem>                | 30                      | Yes              |
| 47                   | 7-Chloro-10-ethyl-1-[[2-[[2-hydroxyethyl]amino]ethyl]amino]-3-[4-         | <chem>OCCNCCNc1cc(cc2c1c(=O)c1c(n2CC)ccc(c1)Cl)c1ccc(cc1)C(F)(F)F</chem>                           | 31                      | Yes              |
| 48                   | Iromycin                                                                  | <chem>CCCc1c(C/C=C(/C/C=C(C)C)C)[nH]c(=O)c(c1O)C</chem>                                            | 32                      | Yes              |
| 49                   | 3,6-disubstituted Indole B                                                | <chem>O/N=C\Cc1c[nH]c2c1ccc(c2)CC=C(C)C</chem>                                                     | 33                      | Yes              |
| 50                   | Vnezueline E                                                              | <chem>CCCC(=O)OCc1ccc2c(c1)nc1c(o2)cc(=O)c(c1)NC(=O)C</chem>                                       | 34                      | Yes              |
| 51                   | Vnezueline A                                                              | <chem>OCc1cc2nc3cc(NC(=O)C)c(=O)cc3oc2cc1Cc1ccc(c(c1)NC(=O)C)O</chem>                              | 34                      | No               |
| 52                   | (5Z,8Z,11R*,12R*)-11,12-Dihydroxytetradeca-5,8-dienamide                  | <chem>CCC(C(C/C=C\C/C=C\C)CCCC(=O)N)O)O</chem>                                                     | 35                      | Yes              |
| 53                   | TA 3037A                                                                  | <chem>O=c1oc2cccc(c2[nH]/c1=C\c1cccc1)C(=O)O</chem>                                                | 36                      | Yes              |
| 54                   | Mycemycin G                                                               | <chem>Clc1ccc2c(c1)C(=O)Nc1c(O2)c(C)ccc1C(=O)C</chem>                                              | 36                      | No               |
| 55                   | Myxochelin A                                                              | <chem>OC[C@@H](NC(=O)c1cccc(c1O)O)CCCCNC(=O)c1cccc(c1O)O</chem>                                    | 37                      | Yes              |
| 56                   | Rosmarinic acid                                                           | <chem>O=C(O[C@H](C(=O)O)Cc1ccc(c(c1O)O)/C=C/c1ccc(c(c1O)O)O</chem>                                 | 37                      | No               |

[illegible]

| Comp No <sup>a</sup> | Name                                                                                  | SMILES <sup>b</sup>                                                                                                                                                                                                                                             | Cluster No <sup>c</sup> | Rep <sup>d</sup> |
|----------------------|---------------------------------------------------------------------------------------|-----------------------------------------------------------------------------------------------------------------------------------------------------------------------------------------------------------------------------------------------------------------|-------------------------|------------------|
| 90                   | Spiroindimicin D                                                                      | <chem>COC(=O)c1[nH]c(c2c1c1c3cc(Cl)ccc3[nH]c1[C@]12CN(c2c1cc(Cl)cc2)C)C(=O)OC</chem>                                                                                                                                                                            | 55                      | No               |
| 91                   | Spiroindimicin B                                                                      | <chem>COC(=O)c1[nH]cc2c1[C@]1(CN(c3c1cc(Cl)cc3)C)c1c2c2cc(Cl)ccc2[nH]1</chem>                                                                                                                                                                                   | 55                      | Yes              |
| 92                   | Wailupemycin F                                                                        | <chem>OC1CC(=O)c2c(C1)c(c1cc(O)cc(=O)o1)c(cc2O)c1cccc1</chem>                                                                                                                                                                                                   | 56                      | Yes              |
| 93                   | Phaeochromycin B                                                                      | <chem>CCCC1cc(O)c2c(c1c1cc(O)cc(=O)o1)CC(CC2=O)O</chem>                                                                                                                                                                                                         | 56                      | No               |
| 94                   | Fijiolide B                                                                           | <chem>O=C1OC[C@H](O)c2ccc3c(c2Cl)C2=CC=C[C@@]2([C@@H]3Oc2c(cc([C@H](C1)N)cc2Cl)O)OC1O</chem><br><chem>C(C)(C)C(C(C1O)O)N(C)C</chem>                                                                                                                             | 57                      | Yes              |
| 95                   | CHEMBL517944                                                                          | <chem>CCCCCOc1ccc2c(c1)ccc(c2)S(=O)(=O)N[C@@H](C(=O)O)CCC(=O)O</chem>                                                                                                                                                                                           | 58                      | Yes              |
| 96                   | Acetamide, N-[2-hydroxy-5-[[8-(hydroxymethyl)-3-oxo-3H-phenoxazin-2-yl]amino]phenyl]- | <chem>OCc1ccc2c(c1)nc1c(o2)cc(=O)c(c1)Nc1ccc(c(c1)NC(=O)C)O</chem>                                                                                                                                                                                              | 59                      | Yes              |
| 97                   | U 68204                                                                               | <chem>C=C/C(=C/[C@@]1(CC)SC(=C(C1=O)CC(=O)N)O)/C</chem>                                                                                                                                                                                                         | 60                      | Yes              |
| 98                   | Goadsporin                                                                            | <chem>CC[C@@H]([C@@H](C(=N[C@H](c1scc(n1)C(=N[C@H](C(=NCC(=NCc1nc(c(o1)C)C(=N[C@H](C(=NC(=C)c1ccc(n1)C(=N[C@H](C(=NCC1scc(n1)C(=N[C@H](C(=O)O)C(C)O)O)O)CC(C)O)O)O)CO)O)CC(C)O)N=C(c1nc(oc1C)C(=C)N=C([C@H](C(C)C)N=C(c1nc(oc1C)[C@@H](N=C(O)C(C)O)O)O)C</chem> | 61                      | Yes              |
| 99                   | Linearolide B                                                                         | <chem>COC1CCC(C1/C=C/C(=C/C(C(O)C)/C)/C/C=C/C(C/C=C/C(C1OC(O)(CC)C(C(C1O)OC)OC)C)O</chem><br><chem>C1OC(C)C(C(C1)NC(=O)C)O)O)C</chem>                                                                                                                           | 62                      | Yes              |
| 100                  | Juniperolide A                                                                        | <chem>CO/C(=C/[C@@H]([C@H]/C(=C/CC[C@@H]([C@H]/C(=C/C=C/[C@H](O)C)/C)O)C)/C)O[C@@H]1C[C@H](NC(=O)C)[C@@H]([C@H](O1)C)O)/C[C@H]1OC(O)(CC)C[C@@H]([C@@H]1C)O</chem>                                                                                               | 62                      | No               |
| 101                  | Marineosin B                                                                          | <chem>CO[C@H]1CC(=N[C@]21O[C@H](C)C[C@H]1[C@H]2c2ccc([nH]2)CCCCCCC1)c1[nH]ccc1</chem>                                                                                                                                                                           | 63                      | Yes              |
| 102                  | CHEBI:66676                                                                           | <chem>CO[C@@H]1C/C(=C/2/C=CC=N2)/N[C@@]21O[C@H](C)C[C@H]1[C@H]2c2ccc([nH]2)CCCCC</chem><br><chem>C1</chem>                                                                                                                                                      | 64                      | Yes              |
| 103                  | Bohemamine G                                                                          | <chem>O=C(NC1=CC(=O)[C@]2(N1[C@@H](C)CC2)C)/C=C/C(C)C</chem>                                                                                                                                                                                                    | 65                      | Yes              |
| 104                  | Bohemamine I                                                                          | <chem>C[C@H]1CC[C@@]2(N1C(=CC2=O)NC(=O)c1cccc1)C</chem>                                                                                                                                                                                                         | 65                      | No               |
| 105                  | Streptenol I                                                                          | <chem>C/C=C/CCC(=O)C[C@H](CCO[C@]1(OCC[C@@H](C1)O)CC/C=C/C)O</chem>                                                                                                                                                                                             | 66                      | Yes              |
| 106                  | Niizalactam A                                                                         | <chem>C/C1=C\C=C\C[C@H]2[C@H](O)[C@H](CN2C(=O)CC(=O)/C=C/C(=C/C=C/[C@H]([C@@H]([C@@H]([C(=O)/C=C\C=C1)O)O)O)C)C</chem>                                                                                                                                          | 67                      | Yes              |
| 107                  | Niizalactam B                                                                         | <chem>C/C1=C\C=C\C[C@H]2[C@H](O)[C@H](CN2C(=O)CC(=O)/C=C/C(=C/C=C/C[C@H]([C@@H](C(=O)/C=C\C=C1)O)O)C)C</chem>                                                                                                                                                   | 67                      | No               |
| 108                  | Donghaesulfin A                                                                       | <chem>COc1cccc2c1[C@@H](OC)c1c([C@H]2O)c2C(=O)C[C@H]([C@@H](c2cc1Sc1cc2[C@@H](O)[C@H](C)CC(=O)c2c2c1[C@H](OC)c1c(OC)cccc1[C@@H]2O)O)C</chem>                                                                                                                    | 68                      | Yes              |
| 109                  | Donghaesulfin B                                                                       | <chem>COc1cccc2c1[C@@H](OC)c1c([C@H]2O)c2C(=O)C[C@H]([C@@H](c2cc1Sc1cc2[C@@H](O)[C@H](C)CC(=O)c2c2c1[C@H](O)c1c(OC)cccc1C2=O)O)C</chem>                                                                                                                         | 68                      | No               |
| 110                  | Galbonolide G                                                                         | <chem>CC[C@@H](C/C=C(C)C[C@H](C=C/C[C@]1(CO)OC(=O)C(=C1O)C)C)/C)O</chem>                                                                                                                                                                                        | 69                      | Yes              |
| 111                  | Lauroyl vanillylamide                                                                 | <chem>CCCCCCCCCCCC(=O)NCc1ccc(c(c1)OC)O</chem>                                                                                                                                                                                                                  | 70                      | No               |
| 112                  | Alkylresorcylic acid                                                                  | <chem>CC(CCCCCCCCCCCCc1c(C)c(O)cc(c1C(=O)O)O)C</chem>                                                                                                                                                                                                           | 70                      | Yes              |
| 113                  | n-Lauryl-5-hydroxyanthranilate                                                        | <chem>CCCCCCCCCCCCNC1ccc(cc1C(=O)[O-])O</chem>                                                                                                                                                                                                                  | 70                      | No               |
| 114                  | Panosialin WA                                                                         | <chem>CC(CCCCCCCCCCCCc1cc(O)cc(c1)OS(=O)(=O)O)C</chem>                                                                                                                                                                                                          | 71                      | No               |
| 115                  | Panosialin WB                                                                         | <chem>CCCCCCCCCCCCCCCCc1cc(O)cc(c1)OS(=O)(=O)[O-].[Na+]</chem>                                                                                                                                                                                                  | 71                      | No               |
| 116                  | Panosialin A                                                                          | <chem>CC(CCCCCCCCCCCCc1cc(cc1)OS(=O)(=O)[O-])OS(=O)(=O)[O-].C.[Na+].[Na+]</chem>                                                                                                                                                                                | 71                      | No               |
| 117                  | Panosialin-IA                                                                         | <chem>CCCCCCCCCCCCCCCCc1cc(cc1)OS(=O)(=O)O)OS(=O)(=O)O</chem>                                                                                                                                                                                                   | 71                      | Yes              |
| 118                  | Homodimericin A                                                                       | <chem>C/C=C/C=C/[C@@]1(O)[C@@H]2C=C3[C@@]45[C@@]([C@@H]1[C@@H]1C(=O)C(=C(C(=O)[C@]41CC3=O)O)C)/([C@H]2C)C(=O)C(=C(C5=O)C)O</chem>                                                                                                                               | 72                      | Yes              |
| 119                  | Tetroazolemycin A                                                                     | <chem>CN1[C@H](CS[C@H]1[C@@H]1COC(=N1)c1cccc1O)CN1[C@H]2CSSC[C@H](C1=O)N(C2=O)C[C@H]1CS[C@H](N1C)[C@@H]1COC(=N1)c1cccc1O</chem>                                                                                                                                 | 73                      | Yes              |
| 120                  | Tetroazolemycin B                                                                     | <chem>CN1[C@H](CS[C@H]1[C@@H]1COC(=N1)c1cccc1O)CN1[C@H]2CSSC[C@H](C1=O)N(C2=O)C[C@H]1CS[C@H](N1C)[C@@H]1COC(=N1)c1cccc1O</chem>                                                                                                                                 | 73                      | No               |
| 121                  | HMS1844K12                                                                            | <chem>COc1ccc(cc1)c1noc(n1)CSc1nnc(n1c1ccc(cc1)OC)C</chem>                                                                                                                                                                                                      | 74                      | Yes              |
| 122                  | FD-594                                                                                | <chem>CCC[C@H]1OC(=O)c2c(C1)cc1c(c2O)c2O)c3C(=O)C4C(Oc3c(c2[C@H]([C@H]1O)O)OC)C=CC</chem><br><chem>(=C4O)OC1CC(O)C(C(O1)C)OC1CC(O)C(C(O1)C)OC1CC(OC)C(C(O1)C)O</chem>                                                                                           | 75                      | Yes              |
| 123                  | 7-Acetyl-3,6-dihydroxy-8-methyl-tetralone                                             | <chem>OC1CC(=O)c2c(C1)cc(c(c2C)C(=O)C)O</chem>                                                                                                                                                                                                                  | 76                      | Yes              |

| Comp No <sup>a</sup> | Name                                                                       | SMILES <sup>b</sup>                                                                                                                          | Cluster No <sup>c</sup> | Rep <sup>d</sup> |
|----------------------|----------------------------------------------------------------------------|----------------------------------------------------------------------------------------------------------------------------------------------|-------------------------|------------------|
| 124                  | (R)-7-Acetyl-3,6-dihydroxy-8-propyl-3,4-dihydronaphthalen-1(2H)-one        | <chem>CCCC1c2C(=O)C[C@@H](Cc2cc(c1C(=O)C)O)O</chem>                                                                                          | 76                      | No               |
| 125                  | Gastrophenzine                                                             | <chem>CCOC(=O)Nc1cccc2c1CN(C)CC2c1ccc(cc1)Cl</chem>                                                                                          | 77                      | Yes              |
| 126                  | Telomestatin                                                               | <chem>Cc1oc2nc1c1occ(n1)c1occ(n1)c1occ(n1)c1occ(c3nc(C4=NC(c5nc2c(C)o5)CS4)co3)n1</chem>                                                     | 78                      | Yes              |
| 127                  | Xantholipin B                                                              | <chem>COc1c(Cl)ccc2c1oc1c3OCO[C@H]4c3c(c(c1c2=O)O)c1c(C4)c(O)c2c(c1O)c(=O)[nH]c(c2)C</chem>                                                  | 79                      | Yes              |
| 128                  | Lysolipin I                                                                | <chem>CO[C@H]1N(C)C(=O)c2c([C@H]1O)cc1c(c2O)c2c3C([C@H]1OC)OCOc3c1c(c2O)c(=O)c2c(o1)c(O)C(c2)Cl</chem>                                       | 80                      | Yes              |
| 129                  | Xantholipin                                                                | <chem>COc1c(Cl)ccc2c1oc1c3OCO[C@H]4c3c(c(c1c2=O)O)[C@@]1([C@H](C4)C(=O)c2c(C1=O)c(=O)[nH]c(c2)C)O</chem>                                     | 81                      | Yes              |
| 130                  | 2-Benzylthio-8-methyl-7-phenylpyrano [2,3-f]benzoxazol- 6(h)-one           | <chem>O=C1C(C)c2ocnc2C2=C1CC=C(O2)c1cccc1SCc1cccc1</chem>                                                                                    | 82                      | Yes              |
| 131                  | 2,18-seco-Lankacidinol B                                                   | <chem>OC/C=C(/C=C/[C@H](C/C=C(/C=C/[C@H](C[C@H]1OC(=O)C(=C([C@H]1C)O)C)O)\C)O)\C</chem>                                                      | 83                      | Yes              |
| 132                  | 2-Methoxy-4,5-diphenyl-6-(2'-phenylethyl)pyrimidine                        | <chem>COc1cc(c2cccc2)c(cc1c1cc(Cc2cccc2)nc(n1)c1cccc1)c1cccc1</chem>                                                                         | 84                      | Yes              |
| 133                  | SF2738 F                                                                   | <chem>COc1cc(nc2c1sc2)c1cccn1</chem>                                                                                                         | 85                      | Yes              |
| 134                  | SF2738D                                                                    | <chem>COc1cc(nc(c1SC)C#N)c1cccn1</chem>                                                                                                      | 86                      | Yes              |
| 135                  | (4-Methoxy-3-methylsulfanyl-6-pyridin-2-ylpyridin-2-yl)methanol            | <chem>COc1cc(nc(c1SC)CO)c1cccn1</chem>                                                                                                       | 86                      | No               |
| 136                  | Acidomycin                                                                 | <chem>OC(=O)CCCCC1SCC(=O)N1</chem>                                                                                                           | 87                      | Yes              |
| 137                  | 7-[1-(Thiophene-5-yl)-1-formamido]-3-propylenyl-3-cephem-4-carboxylic acid | <chem>C=CCC1=C(C(=O)O)N2C(SC1)[C@@H](C2=O)NC(=O)c1cccs1</chem>                                                                               | 88                      | Yes              |
| 138                  | (+)-Blastmycinone                                                          | <chem>CCCC[C@H]1C(=O)O[C@H]([C@@H]1OC(=O)C(C)C)C</chem>                                                                                      | 89                      | Yes              |
| 139                  | AgB                                                                        | <chem>O=C(NC12CC3CC(C2)CC(C1)C3)NCc1ccc(cc1)N=C(N)N</chem>                                                                                   | 90                      | Yes              |
| 140                  | Phthoxazolin                                                               | <chem>C/C(=C/C=C/C=C/Cc1ocnc1)/[C@H](C(C(=O)N)(C)C)O</chem>                                                                                  | 91                      | No               |
| 141                  | Inthomycin B                                                               | <chem>C/C(=C/C=C/C=C/Cc1ocnc1)/[C@@H](C(C(=O)N)(C)C)O</chem>                                                                                 | 91                      | Yes              |
| 142                  | Phthoxazolin B                                                             | <chem>OC(c1ocnc1)C=CC=CC=C(C(C(C(=O)N)(C)C)O)C</chem>                                                                                        | 91                      | No               |
| 143                  | Antibiotic X 14885A                                                        | <chem>C[C@@H]1CCC2(O[C@H]1Cc1oc3c(n1)c(C(=O)O)c(cc3)O)CC[C@H](C(O2)C(C(=O)c1ccc[nH]1)C)C</chem>                                              | 92                      | Yes              |
| 144                  | Cezomycin                                                                  | <chem>C[C@@H]1CCC2(O[C@H]1Cc1nc3c(o1)cccc3C(=O)O)O[C@H](C(CC2C)C)C(C(=O)c1[nH]ccc1)C</chem>                                                  | 92                      | No               |
| 145                  | Luteoride D                                                                | <chem>COC(=O)C1=NOC2C(C1)(O)c1cccc(c1N2)/C=C/C(=C)C</chem>                                                                                   | 93                      | Yes              |
| 146                  | Lorneic acid I                                                             | <chem>CCCC(c1cc(C)ccc1/C=C/CCCC(=O)O)SSCC(C(=O)O)NC(=O)C</chem>                                                                              | 94                      | Yes              |
| 147                  | beta-Sitosteryl glucoside-3'-O-heptadecoate                                | <chem>CC[C@@H](C(C)C)CC[C@H]([C@H]1CC[C@H]2[C@]1(C)CC[C@H]1[C@@]2(C)CC=C2[C@]1(C)CCC(C2)OC(=O)/C=C/c1ccc(c(c1)OC)O)C</chem>                  | 95                      | No               |
| 148                  | UK-2A                                                                      | <chem>COc1ccnc(c1O)C(=O)N[C@H]1COC(=O)[C@H]([C@H]([C@@H](OC1=O)C)OC(=O)C(C)C)Cc1ccc1</chem>                                                  | 95                      | No               |
| 149                  | Antimycin A3a                                                              | <chem>CCCCC1C(=O)OCC(C(=O)OC(C1OC(=O)C(CC)C)C)NC(=O)c1cccc(c1O)NC=O</chem>                                                                   | 95                      | No               |
| 150                  | Antimycin A8a                                                              | <chem>O=CNc1cccc(c1O)C(=O)NC1COC(=O)C(C(C(OC1=O)C)OC(=O)C(CC)C)CCC(C)C</chem>                                                                | 95                      | No               |
| 151                  | Uk-2c,D                                                                    | <chem>CCC(C(=O)OC1C(C)OC(=O)C(COC(=O)C1Cc1cccc1)NC(=O)c1nccc(c1O)OC)C.COc1ccnc(c1O)C(=O)NC1COC(=O)C(C(C(OC1=O)C)OC(=O)CC(C)C)Cc1cccc1</chem> | 95                      | Yes              |
| 152                  | 4,4'-(3-hydroxypropane-1,1-diyl)diphenol                                   | <chem>OCCC(c1ccc(cc1)O)c1ccc(cc1)O</chem>                                                                                                    | 96                      | Yes              |
| 153                  | Diolmycin B1                                                               | <chem>OC(C(Cc1ccc(cc1)O)O)Cc1ccc(cc1)O</chem>                                                                                                | 97                      | Yes              |
| 154                  | Diolmycin A1                                                               | <chem>Oc1ccc(cc1)CC(C(Cc1c[nH]c2c1cccc2)O)O</chem>                                                                                           | 97                      | No               |



| Comp No <sup>a</sup> | Name                                                                                                                                                                | SMILES <sup>b</sup>                                                                                           | Cluster No <sup>c</sup> | Rep <sup>d</sup> |
|----------------------|---------------------------------------------------------------------------------------------------------------------------------------------------------------------|---------------------------------------------------------------------------------------------------------------|-------------------------|------------------|
|                      | methyl-2,7-diazatricyclo[6.3.1.0 <sup>4,12</sup> ]dodeca-1(11),2,4,6,8(12),9-hexaen-2-ium                                                                           |                                                                                                               |                         |                  |
| 183                  | 9,11-Diamino-10-chloro-3-(ethylsulfanyl)-6-(methoxymethyl)-2-methyl-2,7-diazatricyclo[6.3.1.0 <sup>4,12</sup> ]dodeca-1(11),2,4,6,8(12),9-hexaen-2-ium              | <chem>COCc1cc2C(=[N+](c3c2c(n1)c(N)c(c3N)Cl)C)SCC</chem>                                                      | 113                     | Yes              |
| 184                  | 9,11-Diamino-10-chloro-3-[(2-acetamidoethyl)sulfanyl]-6-(methoxymethyl)-2-methyl-2,7-diazatricyclo[6.3.1.0 <sup>4,12</sup> ]dodeca-1(11),2,4,6,8(12),9-hexaen-2-ium | <chem>COCc1cc2C(=[N+](c3c2c(n1)c(N)c(c3N)Cl)C)SCCNC(=O)C</chem>                                               | 113                     | No               |
| 185                  | Sulfotanone                                                                                                                                                         | <chem>CC(CCCCCCCCCCCCCCCCCC(=O)[C@@H](CS(=O)(=O)O)O)C</chem>                                                  | 114                     | Yes              |
| 186                  | FR900452                                                                                                                                                            | <chem>CSC[C@@H]1N/C(=C/2/CC=CC2=O)/[C@@H](NC1=O)[C@H]([C@@H]1C(=O)N(c2c1cccc2)C)C</chem>                      | 115                     | Yes              |
| 187                  | FR 900452                                                                                                                                                           | <chem>CSC[C@@H]1N/C(=C/2/CC=CC2=O)/C(NC1=O)[C@H]([C1C(=O)N(c2c1cccc2)C)C</chem>                               | 115                     | No               |
| 188                  | Deoxyypoluteorin                                                                                                                                                    | <chem>Oc1cccc1C(=O)c1[nH]c(c(c1)Cl)Cl</chem>                                                                  | 116                     | Yes              |
| 189                  | Panobinostat                                                                                                                                                        | <chem>ONC(=O)/C=C/c1ccc(cc1)CNCCc1c(C)[nH]c2c1cccc2</chem>                                                    | 117                     | Yes              |
| 190                  | Belinostat                                                                                                                                                          | <chem>ONC(=O)/C=C/c1cccc(c1)S(=O)(=O)Nc1cccc1</chem>                                                          | 118                     | Yes              |
| 191                  | Antibiotic S 632-C                                                                                                                                                  | <chem>CC(C(=O)CC1CC(CC(=O)N)CC(=O)O1)/C=C(/C=C/C)C</chem>                                                     | 119                     | Yes              |
| 192                  | Azalomycin                                                                                                                                                          | <chem>CC[C@]1(C)C[C@@H](OC(=O)CSc2n[nH]c(n2)N)[C@]2(C)CC[C@H]([C@@]3([C@H]([C@@H]1O)C)[C@H]2C(=O)CC3)C</chem> | 120                     | Yes              |
| 193                  | Bagrelactone A                                                                                                                                                      | <chem>O=C1Oc2ccc(cc2)[C@@H](CNc2cc1ccc2O)O</chem>                                                             | 121                     | Yes              |
| 194                  | Boshramycinone A                                                                                                                                                    | <chem>Cc1ccc2=C(O)C3C(C=c2c1)C(=O)c1c(C3=O)c(O)ccc1</chem>                                                    | 122                     | Yes              |
| 195                  | Boshramycinone B                                                                                                                                                    | <chem>Cc1ccc2=C(O)C3C(C=c2c1)C(=O)c1c(C3=O)cccc1O</chem>                                                      | 122                     | No               |
| 196                  | WS 9761 A                                                                                                                                                           | <chem>Oc1cc(C)c2c(c1)C(C)(O)c1c(C2=O)c(O)c(cc1)C</chem>                                                       | 122                     | No               |
| 197                  | WS 9761 B                                                                                                                                                           | <chem>OCc1ccc2c(c1O)C(=O)c1c(C2(C)O)cc(cc1C)O</chem>                                                          | 122                     | No               |
| 198                  | rel-6R,7R,10R-7,10-Epoxy-3,7,11-trimethyldodec-2-ene-1,6,11-triol                                                                                                   | <chem>OC/C=C(/CC[C@H]([C@@]1(C)CC[C@@H](O1)C(O)(C)C)O)C</chem>                                                | 123                     | No               |
| 199                  | Heronapyrrole D                                                                                                                                                     | <chem>C/C(=C\Cc1c[nH]c(c1)N(=O)=O)/CC[C@@H]([C@@]1(C)CC[C@@H](O1)C(O)(C)C)O</chem>                            | 123                     | Yes              |
| 200                  | Glyciapyrrole A                                                                                                                                                     | <chem>C/C(=C/C(=O)c1ccc[nH]1)/C=C/[C@@H]([C@@]1(C)CC[C@@H](O1)C(O)(C)C)O</chem>                               | 123                     | No               |
| 201                  | SCHEMBL13815014                                                                                                                                                     | <chem>C/C(=C/C(=O)c1ccc[nH]1)/C=C/C1OC1(C)CCC=C(C)C</chem>                                                    | 124                     | Yes              |
| 202                  | rel-6R,7R,10R-6,10-Epoxy-3,7,11-trimethyldodec-2-ene-1,7,11-triol                                                                                                   | <chem>OC/C=C(/CC[C@H]1O[C@H](CC[C@@]1(C)O)C(O)(C)C)C</chem>                                                   | 125                     | Yes              |
| 203                  | (5S,6E,9E,13S,14R)-5-Hydroxy-5,9,13,14-tetramethyl-1-oxacyclotetradeca-6,9-diene-2,8-dione                                                                          | <chem>O=C1CCC(C)(O)C=CC(=O)C(=CCCC(C(O1)C)C)C</chem>                                                          | 126                     | No               |
| 204                  | 7-O-Demethoxy-7-oxoalibocycline                                                                                                                                     | <chem>C[C@H]1CC/C=C(C)/C(=O)/C=C/[C@@]/C=C/C(=O)OC1(C)O</chem>                                                | 126                     | No               |
| 205                  | Alibocycline, 2,3-dihydro-                                                                                                                                          | <chem>CO[C@H]1/C=C/[C@@](C)(O)CCC(=O)O[C@@H]([C@H](CC/C=C1/C)C)C</chem>                                       | 126                     | No               |

| Comp No <sup>a</sup> | Name                                                       | SMILES <sup>b</sup>                                                                                            | Cluster No <sup>c</sup> | Rep <sup>d</sup> |
|----------------------|------------------------------------------------------------|----------------------------------------------------------------------------------------------------------------|-------------------------|------------------|
| 206                  | Albocyclin                                                 | <chem>CO[C@H]1/C=C/[C@@](C)(O)/C=C/C(=O)O[C@@H]([C@H](CC/C=C/1\C)C)C</chem>                                    | 126                     | Yes              |
| 207                  | Diosgenone                                                 | <chem>C[C@@H]1CC[C@@]2(OC1)OC1C([C@@H]2C)[C@@]2(C(C1)C1CCC3=CC(=O)C=C[C@@]3(C1CC2)C)C</chem>                   | 127                     | Yes              |
| 208                  | CHEBI:65482                                                | <chem>C/C(=C/Cn1c2cc(ccc2[nH]c2c1cc(cc2C(=O)O)C(=O)c1cccc1)C(=O)c1cccc1)/CCC=C(C)C</chem>                      | 128                     | Yes              |
| 209                  | PI 201                                                     | <chem>CC[C@H](C[C@H]1C(=CC2C([C@@H]1C(=O)OC)CCCC2)C)O</chem>                                                   | 129                     | Yes              |
| 210                  | Homonactic acid methyl ester                               | <chem>CCC(CC1CCC(O1)C(C(=O)OC)C)O</chem>                                                                       | 129                     | No               |
| 211                  | Hydroxyvaleric acid                                        | <chem>C[C@@H]1CC[C@H](C2=C(C[C@H]([C@H]12)O)C)/C=C/C(=O)O\C</chem>                                             | 130                     | Yes              |
| 212                  | Limazepine G                                               | <chem>C/C=C/C1=CN2[C@@H](C1)C(=O)Nc1c(C2=O)ccc(c1O)C</chem>                                                    | 131                     | Yes              |
| 213                  | 2-Acetylamino-3-hydroxyl-4-methylbenzoic acid methyl ester | <chem>COC(=O)c1ccc(c(c1NC(=O)C)O)C</chem>                                                                      | 132                     | Yes              |
| 214                  | Geranylpyrrol A                                            | <chem>COC(=O)c1[nH]cc(c1NC(=O)C)C/C=C(/CCC=C(C)C)\C</chem>                                                     | 133                     | Yes              |
| 215                  | 2-Hydroxylcyslabdan A                                      | <chem>C=C/C(=C/C[C@H]1[C@](O)(CSC[C@H](C(=O)O)NC(=O)C)[C@@H](O)C[C@@H]2[C@]1(C)C[C@@H](O)CC2(C)C)/C</chem>     | 134                     | No               |
| 216                  | Cyslabdan                                                  | <chem>C=C/C(=C/C[C@H]1[C@](O)(CSC[C@H](C(=O)O)NC(=O)C)[C@@H](O)C[C@@H]2[C@]1(C)C[C@@H](O)CC2(C)C)/C</chem>     | 134                     | Yes              |
| 217                  | 17-Hydroxylcyslabdan A                                     | <chem>C=C/C(=C/C[C@H]1[C@](O)(C(SC[C@H](C(=O)O)NC(=O)C)O)[C@@H](O)C[C@@H]2[C@]1(C)CC[C@@H](O)CC2(C)C)/C</chem> | 134                     | No               |
| 218                  | Cyslabdan B                                                | <chem>C=C/C(=C/C[C@H]1[C@](O)(CSC[C@H](C(=O)O)NC(=O)C)[C@@H](O)C[C@@H]2[C@]1(C)C[C@@H](O)CC2(C)C)/C</chem>     | 134                     | No               |
| 219                  | JBIR-77                                                    | <chem>COC1c2coc(c2C(=O)c2c1cc(O)c(c2O)OC)C</chem>                                                              | 135                     | No               |
| 220                  | IIQ A                                                      | <chem>COc1c(O)cc2c(c1O)C(=O)c1c(C2=O)c[nH]c1C</chem>                                                           | 135                     | No               |
| 221                  | Isofuranonaphthoquinone C                                  | <chem>COc1cc2C(=O)c3coc(c3C(=O)c2c(c1O)O)C</chem>                                                              | 135                     | No               |
| 222                  | Isofuranonaphthoquinone D                                  | <chem>COc1c(OC)cc2c(c1O)C(=O)c1c(C2=O)coc1C</chem>                                                             | 135                     | No               |
| 223                  | Isofuranonaphthoquinone E                                  | <chem>COc1c(O)c(O)c2c(c1O)C(=O)c1c(C2=O)c(oc1)C</chem>                                                         | 135                     | No               |
| 224                  | Isofuranonaphthoquinone A                                  | <chem>O=C1c2coc(c2C(=O)c2c1cc(O)c(c2O)O)C</chem>                                                               | 135                     | No               |
| 225                  | Isofuranonaphthoquinone B                                  | <chem>COc1c(O)cc2c(c1O)C(=O)c1c(C2=O)coc1C</chem>                                                              | 135                     | Yes              |
| 226                  | Isofuranonaphthoquinone F                                  | <chem>COc1c(O)c2c(c(c1O)O)C(=O)c1c(C2=O)c(C)oc1</chem>                                                         | 135                     | No               |
| 227                  | Bostrycoidin-9-methyl ether                                | <chem>COc1cc(OC)c2c(c1O)C(=O)c1c(C2=O)cnc(c1)C</chem>                                                          | 136                     | Yes              |
| 228                  | Naphthgeranine A                                           | <chem>COc1cc(OC)c2c(c1)C(=O)C1=C(C2=O)OC(C2C1C=C(C)CC2)(C)C</chem>                                             | 136                     | No               |
| 229                  | Hybrubin B                                                 | <chem>C/C=C/1\NC(=O)C(C1=O)/C=C\c1[nH]c(cc1OC)c1[nH]ccc1</chem>                                                | 137                     | Yes              |
| 230                  | BRN 0400664                                                | <chem>CCC(=O)NCCc1c[nH]c2c1cccc2</chem>                                                                        | 138                     | Yes              |
| 231                  | WS 30581B                                                  | <chem>CCCCc1ncc(o1)c1c[nH]c2c1cccc2</chem>                                                                     | 138                     | No               |
| 232                  | Vnezueline F                                               | <chem>CC(=O)Nc1cc(COCc2ccc(c(c2)NC(=O)C)O)ccc1O</chem>                                                         | 139                     | Yes              |
| 233                  | Neoansamycin B                                             | <chem>CCCC[C@@H]1C(=O)N[C@]23[C@H]1[C@]1(C)C(=O)[C@@H](OC)CCC/C(=C/4[C@@]1(C2)c1c(C3=O)ccc(c1O4)O)/CC</chem>   | 140                     | Yes              |
| 234                  | Neoansamycin C                                             | <chem>CCCC[C@@H]1C(=O)N[C@]23[C@H]1[C@]1(C)C(=O)[C@@H](OC)CCC/C(=C/4[C@@]1(C2)c1c(C3=O)ccc(c1O4)O)/CC</chem>   | 140                     | No               |
| 235                  | Neoansamycin A                                             | <chem>CCCC[C@H]1/C=C(\C)/C(=O)[C@@H](OC)CCC[C@H](C(=O)c2c3C(=O)C=C(NC1=O)C(=O)c3ccc2O)CC</chem>                | 140                     | No               |
| 236                  | Lugdunomycin                                               | <chem>COc1cccc2c1[C@H](O)[C@]13[C@]([C@H]2Oc2cc(C)cc4c2cc(O)cc4)(C[C@H](C1)O)C(=O)NC3=O</chem>                 | 141                     | Yes              |
| 237                  | T22-azaphilone                                             | <chem>C/C=C/C=C/C1=CC2=CC(=O)[C@@](C(=O)C2=CO1)(C)OC(=O)C[C@@H](O)C</chem>                                     | 142                     | Yes              |
| 238                  | Galbonolide F                                              | <chem>CC[C@@H]1OC(=O)[C@H](C)C(=O)c2coc(c2)C[C@H](CC(=C)/C=C\1/C)C</chem>                                      | 143                     | Yes              |
| 239                  | Lorneic acid K                                             | <chem>CCCC(c1cc(C)ccc1/C=C/CCCC(=O)O)O</chem>                                                                  | 144                     | Yes              |
| 240                  | Lorneic acid E                                             | <chem>CC/C=C/c1cc(C)ccc1/C=C/CC(CC(=O)O)O</chem>                                                               | 144                     | No               |



| Comp No <sup>a</sup> | Name                                                                     | SMILES <sup>b</sup>                                                                                          | Cluster No <sup>c</sup> | Rep <sup>d</sup> |
|----------------------|--------------------------------------------------------------------------|--------------------------------------------------------------------------------------------------------------|-------------------------|------------------|
| 241                  | Ammosamide G                                                             | <chem>Clc1ccc(cc1)N=c1n(C)c2c3c1cc(nc3c(c2N)Cl)N)C(=O)N</chem>                                               | 145                     | Yes              |
| 242                  | Cryptolepinone                                                           | <chem>O=c1c2ccccc2n(c2c1[nH]c1c2ccc1)C</chem>                                                                | 146                     | Yes              |
| 243                  | 3-((2E,4E,6E,8E)-13-Hydroxytetradeca-2,4,6,8-tetraenamido)propanoic acid | <chem>CC(CCC/C=C/C=C/C=C/C=C/C(=O)NCCC(=O)O)O</chem>                                                         | 147                     | Yes              |
| 244                  | 1,19-bis(3-Hydroxyazetidin-1-yl)nonadeca-5,14-diene-1,8,12,19-tetraone   | <chem>OC1CN(C1)C(=O)CCCC=CCC(=O)CCCC(=O)CC=CCCCC(=O)N1CC(C1)O</chem>                                         | 148                     | Yes              |
| 245                  | Epicatechin                                                              | <chem>Oc1cc2O[C@H](c3ccc(c(c3)O)O)[C@@H](Cc2c(c1)O)O</chem>                                                  | 149                     | No               |
| 246                  | Catechin                                                                 | <chem>Oc1cc2O[C@H](c3ccc(c(c3)O)O)[C@H](Cc2c(c1)O)O</chem>                                                   | 149                     | No               |
| 247                  | Luteolin                                                                 | <chem>Oc1cc(O)c2c(c1)oc(cc2=O)c1ccc(c(c1)O)O</chem>                                                          | 149                     | No               |
| 248                  | BE 14348B                                                                | <chem>Oc1ccc(cc1)[C@H]1Oc2cc(O)cc(c2C(=O)[C@H]1C)O</chem>                                                    | 149                     | No               |
| 249                  | Naringenin                                                               | <chem>Oc1ccc(cc1)[C@@H]1CC(=O)c2c(O1)cc(cc2O)O</chem>                                                        | 149                     | No               |
| 250                  | Chalconaringenin                                                         | <chem>Oc1ccc(cc1)/C=C/C(=O)c1c(O)cc(cc1O)O</chem>                                                            | 149                     | No               |
| 251                  | 3',4',7-Trihydroxyisoflavone                                             | <chem>Oc1ccc2c(c1)occ(c2=O)c1ccc(c(c1)O)O</chem>                                                             | 149                     | No               |
| 252                  | Gliricidin                                                               | <chem>COc1c(O)cc(cc1O)c1coc2c(c1=O)ccc(c2)O</chem>                                                           | 149                     | No               |
| 253                  | 5,7,4'-trihydroxy-3'-methoxyisoflavone                                   | <chem>COc1cc(ccc1O)c1coc2c(c1=O)c(O)cc(c2)O</chem>                                                           | 149                     | No               |
| 254                  | 5,7,3'-trihydroxy-4'-methoxyisoflavone                                   | <chem>COc1ccc(cc1O)c1coc2c(c1=O)c(O)cc(c2)O</chem>                                                           | 149                     | No               |
| 255                  | Orobol                                                                   | <chem>Oc1cc(O)c2c(c1)occ(c2=O)c1ccc(c(c1)O)O</chem>                                                          | 149                     | Yes              |
| 256                  | L 694746                                                                 | <chem>OC(=O)COc1ccc(cc1)C[C@@H](C(=O)N[C@@H]1C(O)Cc2c1cccc2)C[C@@H]([C@H](Cc1ccccc1)NC(=O)OC(C)(C)C)O</chem> | 150                     | Yes              |
| 257                  | 1,3-Diphenyl-4H-1,2,4-triazoline-5-thione                                | <chem>S=c1nc([nH]n1c1ccccc1)c1ccccc1</chem>                                                                  | 151                     | Yes              |
| 258                  | Dinotefuran                                                              | <chem>CC(Oc1cccn1)COc1ccc(cc1)Oc1ccccc1.CN=C(N[N+](=O)[O-])NCC1COCC1</chem>                                  | 152                     | Yes              |
| 259                  | CHEBI:70277                                                              | <chem>C/C(=C)CC[C@@]1(C)O[C@@H]1Cc1c[nH]c(c1)N(=O)=O)/CCC=C(C)C</chem>                                       | 153                     | Yes              |
| 260                  | CHEBI:70279                                                              | <chem>C/C(=C)C/C=C/[C@@H](Cc1c[nH]c(c1)N(=O)=O)O)/CCC=C(C)C</chem>                                           | 153                     | No               |
| 261                  | 1R)-9-Hydroxy-1-methyl-1H,3H,4H,5H,10H-naphtho[2,3-c]pyran-5,10-dione    | <chem>C[C@H]1OCCC2=C1C(=O)c1c(C2=O)cccc1O</chem>                                                             | 154                     | No               |
| 262                  | Utahmycin A                                                              | <chem>Cc1nc(C)c2c(c1)C(=O)c1c(C2=O)c(O)ccc1.COC(c1coc(c1)C(=O)OC)O</chem>                                    | 154                     | Yes              |
| 263                  | Bhimamycin A                                                             | <chem>Cc1oc(c2c1C(=O)c1c(C2=O)cccc1O)C(O)C</chem>                                                            | 154                     | No               |
| 264                  | Bhimamycin I                                                             | <chem>Oc1cccc2c1C(=O)c1c(C2=O)c2n(c1C)CCOC2C</chem>                                                          | 154                     | No               |
| 265                  | Antibiotic A 121                                                         | <chem>COC(C(C(=O)CC1(C)C=COC1(C)C(C=C)C(C)O)C(O)C</chem>                                                     | 155                     | Yes              |
| 266                  | Venezueline D                                                            | <chem>OCOCNc1cc2Nc3cc(CO)ccc3Oc2cc1OCOCO</chem>                                                              | 156                     | Yes              |
| 267                  | Jomthonic acid D                                                         | <chem>C/C=C/[C=C/C(=O)NC(C(c1ccccc1)C)C(=O)OC(C(C(=O)NC(C(=O)O)CCC(=O)N)C)C)\C</chem>                        | 157                     | Yes              |
| 268                  | Jomthonic acid E                                                         | <chem>OC/C=C/[C=C/C(=O)NC(C(c1ccccc1)C)C(=O)OC(C(C(=O)O)C)C)\C</chem>                                        | 158                     | No               |
| 269                  | Jomthonic acid A                                                         | <chem>C/C=C/[C=C/C(=O)N[C@@H]([C@@H](c1ccccc1)C)C(=O)O[C@@H]([C@H](C(=O)O)C)C)\C</chem>                      | 158                     | Yes              |
| 270                  | Jomthonic acid B                                                         | <chem>C/C=C/C=C/C(=O)N[C@@H]([C@@H](c1ccccc1)C)C(=O)O[C@@H]([C@H](C(=O)O)C)C</chem>                          | 158                     | No               |
| 271                  | Jomthonic acid C                                                         | <chem>C/C=C/[C=C/C(=O)N[C@@H]([C@@H](c1ccccc1)C)C(=O)O[C@@H](CC(=O)O)C)\C</chem>                             | 158                     | No               |
| 272                  | 2,5-bis(5-tert-Butyl-2-benzoxazolyl)thiophene                            | <chem>CC(c1ccc2c(c1)nc(o2)c1ccc(s1)c1nc2c(o1)ccc(c2)C(C)(C)C(C)C</chem>                                      | 159                     | Yes              |
| 273                  | Anandin A                                                                | <chem>OCCN1C(=O)C=C2C1=CC[C@]1([C@H]2CC[C@@H]1[C@@H]/C=C/[C@@H](C(C)C)C)C</chem>                             | 160                     | Yes              |

| Comp No <sup>a</sup> | Name                                                                       | SMILES <sup>b</sup>                                                                                                                                                                                                                     | Cluster No <sup>c</sup> | Rep <sup>d</sup> |
|----------------------|----------------------------------------------------------------------------|-----------------------------------------------------------------------------------------------------------------------------------------------------------------------------------------------------------------------------------------|-------------------------|------------------|
| 274                  | Anandin B                                                                  | <chem>OCCN1C(=O)C=C2[C@]1(O)CC[C@]1([C@H]2CC[C@@H]1[C@@H]/C=C/[C@@H](C(C)C)C)C</chem>                                                                                                                                                   | 160                     | No               |
| 275                  | Griseorhodin F                                                             | <chem>COC(=O)CCc1cc2cc(C)oc(=O)c2c(c1O)O</chem>                                                                                                                                                                                         | 161                     | Yes              |
| 276                  | 4-Benzoxazolecarboxylic acid, 5-hydroxy-2-(2-hydroxyphenyl)-               | <chem>Oc1ccccc1c1oc2c(n1)c(C(=O)O)c(cc2)O</chem>                                                                                                                                                                                        | 161                     | No               |
| 277                  | 7beta-Hydroxydigoxin                                                       | <chem>O=C1OCC(=C1)C1CCC2(C1)C(O)CC1C2C(O)CC2C1(C)CCC(C2)OC1CC(O)C(C(O1)C)OC1CC(C)C(C(C1)O)OC1CC(C)C(C(C1)O)O</chem>                                                                                                                     | 162                     | Yes              |
| 278                  | Cogoxin                                                                    | <chem>O=C1OCC(=C1)C1CCC2(C1)C(O)CC1C2CCC2C1(C)CCC(C2)OC1CC(O)C(C(O1)C)OC1CC(O)C(C(O1)C)OC1CC(O)C(C(O1)C)O</chem>                                                                                                                        | 162                     | No               |
| 279                  | 7-Hydroxydigitoxin                                                         | <chem>O=C1OCC(=C1)[C@H]1CCC2([C@]1(C)CCC1C2[C@H](O)CC2[C@]1(C)CC[C@@H](C2)O[C@H]1O[C@H](C)[C@H]([C@H](C1)O)[C@@H]1C[C@H](O)[C@@H]([C@H](O1)C)O)[C@@H]1C[C@H](O)[C@@H]([C@H](O1)C)O</chem>                                               | 163                     | Yes              |
| 280                  | ULDF4                                                                      | <chem>OC1CCC(OC1C)OC1CC(O)C2=C(C1O)Cc1c(C2=O)c(O)c2c3c1OCOC3Cc1c2c(O)c2c(c1)CC1(N(C2=O)CCO1)C</chem>                                                                                                                                    | 164                     | Yes              |
| 281                  | Cuevaene A                                                                 | <chem>CO/C(=C/C(=C/C1CCCC2C1c1cc(O)ccc1O2)/C)/C=C/C(=O)O</chem>                                                                                                                                                                         | 165                     | No               |
| 282                  | Cuevaene C                                                                 | <chem>CO/C(=C/C(=C/C1CCCc2c1c1cc(O)ccc1O2)/C)/C=C/C(=O)O</chem>                                                                                                                                                                         | 165                     | Yes              |
| 283                  | Cuevaene D                                                                 | <chem>C/C(=C/C1CCCc2c1c1cc(O)ccc1O2)/C=C(/C=C/C(=O)N)\OC</chem>                                                                                                                                                                         | 165                     | No               |
| 284                  | Jietacin D                                                                 | <chem>CC[C@@H](CCCCC(=O)CCCCCCCN[N+](=O)C=C)C</chem>                                                                                                                                                                                    | 166                     | Yes              |
| 285                  | Jietacin C                                                                 | <chem>CCCCCCCCC(=O)CCCCCCCN[N+](=O)C=C</chem>                                                                                                                                                                                           | 166                     | No               |
| 286                  | JBIR-133                                                                   | <chem>OC(=O)CCc1nc(cc2c1[nH]c1c2cccc1)C(=O)O</chem>                                                                                                                                                                                     | 167                     | Yes              |
| 287                  | Oxopropaline G                                                             | <chem>OCCC(=O)c1ncc(c2c1[nH]c1c2cccc1)C</chem>                                                                                                                                                                                          | 167                     | No               |
| 288                  | 3-Hydroxypropane-1,2-diyl dipalmitate                                      | <chem>CCCCCCCCCCCCCCCC(=O)OCC(OC(=O)CCCCCCCCCCCCCCCC)CO</chem>                                                                                                                                                                          | 168                     | Yes              |
| 289                  | N-(1-(2,2-Dimethyl- 5-undecyl-1,3-dioxolan-4-yl)-2-hydroxyethyl)stearamide | <chem>CCCCCCCCCCCCCCCCC(=O)NC(C1OC(OC1CCCCCCCCCCCC)(C)C)CO</chem>                                                                                                                                                                       | 168                     | No               |
| 290                  | Hexadecanoic acid, 2-hydroxy-1-(hydroxymethyl) ethyl ester                 | <chem>CCCCCCCCCCCCCCCC(=O)OC(CO)CO</chem>                                                                                                                                                                                               | 169                     | No               |
| 291                  | Glycerol Linoleate                                                         | <chem>CCCCC/C=C/C/C=C/C\CCCCCCCC(=O)OC[C@H](CO)O</chem>                                                                                                                                                                                 | 169                     | No               |
| 292                  | 1-Monolinolein                                                             | <chem>CCCCC/C=C/C/C=C/C\CCCCCCCC(=O)OCC(CO)O</chem>                                                                                                                                                                                     | 169                     | No               |
| 293                  | Hexadecanoic acid, 2,3-dihydroxypropyl ester                               | <chem>CCCCCCCCCCCCCCCC(=O)OCC(CO)O</chem>                                                                                                                                                                                               | 169                     | Yes              |
| 294                  | Aggreceide C                                                               | <chem>OCC(COC(=O)CCCCCCCCCCCCC(C)C)O</chem>                                                                                                                                                                                             | 169                     | No               |
| 295                  | Aggreceide A                                                               | <chem>CC[C@@H](CCCCCCCCCCCC(=O)OC[C@@H](CO)O)C</chem>                                                                                                                                                                                   | 169                     | No               |
| 296                  | Pyridinopyrone A                                                           | <chem>COc1cc(/C=C/C/C=C/C=C/C/c2cccnc2)/C)oc(=O)c1</chem>                                                                                                                                                                               | 170                     | Yes              |
| 297                  | Zoumbericin B                                                              | <chem>COc1cc(Cc2cccc(c2)O)oc(=O)c1</chem>                                                                                                                                                                                               | 170                     | No               |
| 298                  | Gombapyrone A                                                              | <chem>C=CC(c1cc(C)ccc1C=CC=CC(=CCc1oc(=O)c(c1C)OC)C)C)O</chem>                                                                                                                                                                          | 171                     | No               |
| 299                  | Gombapyrone B                                                              | <chem>C=CCc1cc(C)ccc1C=CC=CC(=CCc1oc(=O)c(c1C)O)C)C</chem>                                                                                                                                                                              | 171                     | No               |
| 300                  | Gombapyrone C                                                              | <chem>C=CCc1cc(C)ccc1C=CC=CC=CCc1oc(=O)c(c1C)OC)C</chem>                                                                                                                                                                                | 171                     | No               |
| 301                  | Gombapyrone D                                                              | <chem>C=CCc1cc(C)ccc1C=CC=CC(=CCc1oc(=O)c(c1C)OC)C)C</chem>                                                                                                                                                                             | 171                     | Yes              |
| 302                  | Pladienolide analog 10                                                     | <chem>CC[C@@H]([C@H]([C@H]1O[C@H]1C[C@H]([C@H]1C)/C=C/C=C/[C@H]1OC(=O)C[C@H](O)CC[C@@]([C@H]1)/C=C/[C@@H]1C)OC(=O)NCCCC[C@H]([C@H]1C)N(CCN(C(=O)CCCC[C@H]1SC[C@@H]2[C@H]1NC(=O)N2)C)C)NC(=O)c1ccc(cc1)C1(N=N1)C(F)(F)C(O)C)C)C)O</chem> | 172                     | Yes              |
| 303                  | Lavendiol                                                                  | <chem>CC(C(=O)/C=C/C=C/C/C)[C@H](CCO)O</chem>                                                                                                                                                                                           | 173                     | Yes              |
| 304                  | LMA-P3                                                                     | <chem>CCCCCCCCC(CC(C(C(=O)OC)O)O)O</chem>                                                                                                                                                                                               | 173                     | No               |
| 305                  | 3-((1H-Indol-3-yl)methyl)-6-(4-                                            | <chem>Oc1ccc(cc1)CC1(O)C(=O)NC(C(=O)N1C)Cc1c[nH]c2c1cccc2</chem>                                                                                                                                                                        | 174                     | No               |

| Comp No <sup>a</sup> | Name                                                                                 | SMILES <sup>b</sup>                                                                                                                                          | Cluster No <sup>c</sup> | Rep <sup>d</sup> |
|----------------------|--------------------------------------------------------------------------------------|--------------------------------------------------------------------------------------------------------------------------------------------------------------|-------------------------|------------------|
|                      | hydroxybenzyl)-6-hydroxy-1-methylpiperazine-2,5-dione                                |                                                                                                                                                              |                         |                  |
| 306                  | p-Thaxtomin A                                                                        | <chem>Oc1cccc(c1)CC1(O)C(=O)N(C)C(C(=O)N1C)Cc1c[nH]c2c1cccc2</chem>                                                                                          | 174                     | No               |
| 307                  | 6-((1H-Indol-3-yl)methyl)-3-(4-hydroxybenzyl)-3-hydroxy-1-methylpiperazine-2,5-dione | <chem>Oc1ccc(cc1)CC1(O)NC(=O)C(N(C1=O)C)Cc1c[nH]c2c1cccc2</chem>                                                                                             | 174                     | No               |
| 308                  | 3,6-bis(1H-Indol-3-ylmethyl)piperazine-2,5-dione                                     | <chem>O=C1NC(Cc2c[nH]c3c2cccc3)C(=O)NC1Cc1c[nH]c2c1cccc2</chem>                                                                                              | 174                     | No               |
| 309                  | Cyclo-I-Trp-I-Tyr                                                                    | <chem>Oc1ccc(cc1)C[C@@H]1NC(=O)[C@@H](NC1=O)Cc1c[nH]c2c1cccc2</chem>                                                                                         | 174                     | Yes              |
| 310                  | Streptovaricin C                                                                     | <chem>COC(=O)[C@@H]1[C@H](O)[C@H](C)C(O)[C@H](C)/C=C\C/C(=O)NC2=C(C(=C3C4=C(/C(=C/[C@@H]([C@@H]([C@H]([C@H]1O)C)O)(C)O)/C)OCOC4C(C)c3C2=O)O)OC(=O)C)C</chem> | 175                     | Yes              |
| 311                  | 2-Bromo-1-hydroxyphenazine                                                           | <chem>BrC1ccc2c(c1=O)nc1c([nH]2)cccc1</chem>                                                                                                                 | 176                     | No               |
| 312                  | Phenazine 2                                                                          | <chem>CC(=CCn1c2cccc2nc2c1ccc(c2=O)Br)C</chem>                                                                                                               | 176                     | Yes              |
| 313                  | Phenazine 1                                                                          | <chem>CC1=C(CCC(C1)(C)C)Cn1c2cccc2nc2c1ccc(c2=O)Br</chem>                                                                                                    | 176                     | No               |
| 314                  | WS 9659 B                                                                            | <chem>CC1=C(CCC(C1)(C)C)Cn1c2cccc2nc2c1ccc(c2=O)Cl</chem>                                                                                                    | 176                     | No               |
| 315                  | JBIR-47                                                                              | <chem>CC(=CCc1ccc(c2c1nc1c(=O)ccc(c1[nH]2)CC=C(C)C)O)C</chem>                                                                                                | 177                     | Yes              |
| 316                  | (+)-Sydowic acid                                                                     | <chem>Oc1cc(ccc1[C@@]1(C)CCCC(O1)(C)C)C(=O)O</chem>                                                                                                          | 178                     | Yes              |
| 317                  | Olivetolic acid                                                                      | <chem>CCCCCc1cc(O)cc(c1C(=O)O)O</chem>                                                                                                                       | 179                     | No               |
| 318                  | Sorbicillin                                                                          | <chem>C/C=C/C=C/C(=O)c1cc(C)c(c1O)C)O</chem>                                                                                                                 | 179                     | No               |
| 319                  | Chrysin                                                                              | <chem>Oc1cc(O)c2c(c1)oc(cc2=O)c1cccc1</chem>                                                                                                                 | 179                     | Yes              |
| 320                  | (2S)-Pinocembrin                                                                     | <chem>Oc1cc2O[C@@H](CC(=O)c2c(c1)O)c1cccc1</chem>                                                                                                            | 179                     | No               |
| 321                  | Salaceyin A                                                                          | <chem>CC(CCCCCCCCc1cccc(c1C(=O)O)O)C</chem>                                                                                                                  | 180                     | Yes              |
| 322                  | Pyrrolostatin                                                                        | <chem>C/C(=C\Cc1c[nH]c(c1)C(=O)O)/CCC=C(C)C</chem>                                                                                                           | 180                     | No               |
| 323                  | alpha-Lipomycin                                                                      | <chem>OC(=O)CCC1N(C)C(=O)/C(=C(\C=C\C=C\C=C\C=C(\C=C(C(C)C)O)[C@H]2C[C@H](O)[C@@H]([C@H](O2)C)O)C)/O)/C1=O</chem>                                            | 181                     | Yes              |
| 324                  | Olefinin                                                                             | <chem>OC(=O)CCC1C(=O)/C(=C(\C=C\C=C\C=C\C=C\C=C(\C=C(C(C)C)O)[C@@H]2C[C@H](O)[C@@H]([C@H](O2)C)O)C)/O)/C(=O)N1C</chem>                                       | 181                     | No               |
| 325                  | Tiancilactone G                                                                      | <chem>OCC[C@H]1[C@H](C)[C@@H](OC)CC2[C@]1(C)CCC1[C@]2(C)CC[C@@H]([C@@]1(C)OC(=O)c1cc(Cl)ccc1NC)O</chem>                                                      | 182                     | Yes              |
| 326                  | Tiancilactone F                                                                      | <chem>O/C=C(/[C@H]1[C@H](C)[C@@H](OC)CC2[C@]1(C)CCC1[C@]2(C)CC[C@@H]([C@@]1(C)OC(=O)c1cc(Cl)ccc1NC)O)/C=O</chem>                                             | 182                     | No               |
| 327                  | Tiancilactone J                                                                      | <chem>CNc1ccc(cc1C(=O)OC[C@]1(C)[C@@H](O)CC[C@]2(C1CC[C@]1(C2CC(=O)[C@H]([C@@H]1C1=C(O)C(=O)OC1O)C)C)Cl</chem>                                               | 183                     | Yes              |
| 328                  | Tiancilactone C                                                                      | <chem>CO[C@H]1CC2[C@@]3(C)CCC([C@@]([C3CC[C@@]2([C@H]([C@@H]1C)C1=C(O)C(=O)OC1O)C)(C)CO)OC(=O)c1cc(Cl)ccc1NC</chem>                                          | 183                     | No               |
| 329                  | Tiancilactone A                                                                      | <chem>CO[C@H]1CC2[C@@]3(C)CC[C@H]([C@@]([C3CC[C@@]2([C@H]([C@@H]1C)C1=C(O)C(=O)OC1O)C)(C)COC(=O)c1cc(Cl)ccc1NC)O</chem>                                      | 183                     | No               |
| 330                  | Tiancilactone K                                                                      | <chem>COC1CC2[C@@]3(C)CC[C@H]([C@@]([C3CC[C@@]2([C@H]([C@@H]1C)C1=C(O)C(=O)OC1O)C)(C)COC(=O)c1cc(Cl)ccc1NC)O</chem>                                          | 183                     | No               |
| 331                  | Tiancilactone I                                                                      | <chem>CNc1ccc(cc1C(=O)OC[C@]1(C)[C@@H](O)CC[C@]2(C1CC[C@]1(C2C[C@@H]([C@H]([C@@H]1C1=C(O)C(=O)OC1O)C)C)Cl</chem>                                             | 183                     | No               |
| 332                  | Sannastatin                                                                          | <chem>CN[C@H]1[C@@H](O)[C@@H](O)[C@@H]1C)O[C@H]1C/C=C(\C)/C[C@](C)(O)[C@H](C)/C=C/C[C@@H](CNC(=O)/C=C/C/C[C@@H]1C)C</chem>                                   | 184                     | Yes              |
| 333                  | Vicenistatin                                                                         | <chem>CN[C@H]1[C@@H](O)[C@@H](O)[C@@H]1C)O[C@H]1C/C=C(\C)/C/C(=C/C=CC[C@@H](CN C(=O)/C=C/C/C[C@@H]1C)C)/C</chem>                                             | 184                     | No               |
| 334                  | Cytochalasin J                                                                       | <chem>CC1CC=CC2C(O)C(=C)C(C3C2(C(C=CC(C1)(C)O)O)C(=O)NC3Cc1cccc1)C</chem>                                                                                    | 185                     | Yes              |
| 335                  | Cytochalasin H                                                                       | <chem>CC(=O)O[C@@H]1/C=C/[C@@](C)(O)C[C@H](C/C=C/[C@@H]2C31C(=O)N[C@H]([C@@H]3[C@H](C)C(=C)[C@H]2O)Cc1cccc1)C</chem>                                         | 185                     | No               |
| 336                  | Maremycin G                                                                          | <chem>CSCc1nc2C3=C(CCC3=O)C3([C@@H](c2[nH]c1=O)C)C(=O)N(c1c3cccc1)C</chem>                                                                                   | 186                     | Yes              |

| Comp No <sup>a</sup> | Name                                                                                                    | SMILES <sup>b</sup>                                                                                                                                     | Cluster No <sup>c</sup> | Rep <sup>d</sup> |
|----------------------|---------------------------------------------------------------------------------------------------------|---------------------------------------------------------------------------------------------------------------------------------------------------------|-------------------------|------------------|
| 337                  | SRB-1                                                                                                   | <chem>CC(CC(=O)CCCC[C@H](C1=C(C)C(OC1=O)O)O)C</chem>                                                                                                    | 187                     | Yes              |
| 338                  | SRB-2                                                                                                   | <chem>CCC(CC(=O)CCCC[C@H](C1=C(C)C(OC1=O)O)O)C</chem>                                                                                                   | 187                     | No               |
| 339                  | Bagremycin F                                                                                            | <chem>COC(=O)[C@H](NC(=O)C)CSc1c(ccc(c1N)O)C(=O)Oc1ccc(cc1)C=C</chem>                                                                                   | 188                     | Yes              |
| 340                  | Bagremycin C                                                                                            | <chem>C=Cc1ccc(cc1)OC(=O)c1ccc(c(c1SC[C@H](C(=O)O)NC(=O)C)N)O</chem>                                                                                    | 188                     | No               |
| 341                  | Divergolide A                                                                                           | <chem>CC[C@H]1/C=C/[C@H](OC(=O)/C(=C/CC(=O)Nc2c3O[C@@]4(CC1)CC(=O)[C@H]([C@H](O4)c3cc(c2)O)/C)[C@H](C=C(C)C)O</chem>                                    | 189                     | Yes              |
| 342                  | Mohangic acid C                                                                                         | <chem>OC(=O)C[C@H](/C=C/C=C/C/[C@H]([C@H]([C@@H](C[C@H]([C@@H](CC(=O)c1ccc(cc1)NC(=O)C)O)C)O)C)O</chem>                                                 | 190                     | No               |
| 343                  | Mohangic acid D                                                                                         | <chem>OC(=O)C[C@H](/C=C/C=C/C/[C@H]([C@H]([C@@H](C[C@H]([C@@H](C[C@H](c1ccc(cc1)NC(=O)C)O)C)O)C)O</chem>                                                | 190                     | No               |
| 344                  | (2E)-17-(4'-Aminophenyl)-3,11,15-trihydroxy-10,12,14-trimethyl-17-oxoheptadeca-4,6,8-trienoic acid      | <chem>OC(=O)CC(/C=C/C=C/C/C(C(C(C(C(=O)c1ccc(cc1)N)O)C)O)C)O</chem>                                                                                     | 190                     | Yes              |
| 345                  | Mohangic acid A                                                                                         | <chem>OC(=O)C[C@H](/C=C/C=C/C/[C@H]([C@H]([C@@H](C[C@H]([C@@H](CC(=O)c1ccc(cc1)N)O)C)O)C)O</chem>                                                       | 190                     | No               |
| 346                  | Fexofenadine                                                                                            | <chem>OC(=O)C(c1ccc(cc1)C(CCCN1CCC(CC1)C(c1ccccc1)(c1ccccc1)O)O)(C)C</chem>                                                                             | 191                     | Yes              |
| 347                  | Ansaetherone                                                                                            | <chem>CC=C1/C=C(\C)/[C@H]2Oc3c(NC(=O)C(C1=O)C)cc(cc3[C@H]([C@@H]2C)O[C@H]1CC[C@H](C(O1)C)O)O</chem>                                                     | 192                     | Yes              |
| 348                  | (S)-2-(5(2,3-Dihydroxy-3-methylbutyl)-1H-indol-3-yl)acetoneitrile                                       | <chem>O[C@H](C(O)(C)C)Cc1ccc2c(c1)c(CC#N)c[nH]2</chem>                                                                                                  | 193                     | Yes              |
| 349                  | (R)-6-(2,3-Dihydroxy-3-methylbutyl)indole                                                               | <chem>O[C@@H](C(O)(C)C)Cc1ccc2c(c1)[nH]cc2</chem>                                                                                                       | 193                     | No               |
| 350                  | Alnumycin S                                                                                             | <chem>CCC[C@H]1OC(=Cc2c1c(O)c1c(c2)C(=O)C=C(C1=O)C1O[C@H]([C@H](O1)CO)CO)C</chem>                                                                       | 194                     | No               |
| 351                  | Alnumycin A                                                                                             | <chem>CCC[C@H]1OC(=Cc2c1c(O)c1c(c2)C(=O)C=C(C1=O)C1OC[C@H]([C@H](O1)CO)O)C</chem>                                                                       | 194                     | No               |
| 352                  | Alnumycin B2                                                                                            | <chem>CCC[C@H]1OC(=Cc2c1c(O)c1c(c2)C(=O)C=C(C1=O)[C@H]1O[C@@H]2[C@H](O1)CO[C@H]2O)C</chem>                                                              | 194                     | No               |
| 353                  | Alnumycin B1                                                                                            | <chem>CCC[C@H]1OC(=Cc2c1c(O)c1c(c2)C(=O)C=C(C1=O)[C@@H]1O[C@@H]2[C@H](O1)CO[C@H]2O)C</chem>                                                             | 194                     | Yes              |
| 354                  | Prealnumycin                                                                                            | <chem>CCC[C@H]1OC(=Cc2c1c(O)c1c(c2)C(=O)C=CC1=O)C</chem>                                                                                                | 194                     | No               |
| 355                  | Esterastin                                                                                              | <chem>CCCCC/C=C/C/C=CC(CC1OC(=O)C1CCCCC)OC(=O)C(NC(=O)C)CC(=O)N</chem>                                                                                  | 195                     | No               |
| 356                  | Orlistat                                                                                                | <chem>CCCCCCCCCCC[C@@H](C[C@H]1OC(=O)[C@H]1CCCCC)OC(=O)[C@H](CC(C)C)NC=O</chem>                                                                         | 195                     | No               |
| 357                  | Lipstatin                                                                                               | <chem>CCCCC/C=C/C=C/C[C@H](C[C@H]1OC(=O)[C@H]1CCCCC)OC(=O)[C@H](CC(C)C)NC=O</chem>                                                                      | 195                     | Yes              |
| 358                  | Naphthomycin K                                                                                          | <chem>O[C@H]1/C=C/[C@H](C)[C@H](O)[C@@H](C)/C=C(/C)/C(=O)c2c(O)c(C)cc3c2C(=O)C(=C2C43[C@H]//C=C/C/[C@H](CC(=O)/C(=C/C1)/C)O)C)C=CC(O4)C(=O)N2)Cl</chem> | 196                     | Yes              |
| 359                  | 3-((3E,6E,8E,10R,11R,12E)-11-Hydroxy-4,8,10,12-tetramethyltetradeca-3,6,8,12-tetraenamido)butanoic acid | <chem>C/C=C(/[C@@H]([C@@H]/C=C(/C=C/C/C(=C/CC(=O)NC(CC(=O)O)C)/C)C)O)\C</chem>                                                                          | 197                     | Yes              |
| 360                  | 3E,6E,8E,10R,11R,12E)-11-Hydroxy-4,8,10,12-tetramethyltetradeca-3,6,8,12-tetraenoic acid                | <chem>C/C=C(/[C@@H]([C@@H]/C=C(/C=C/C/C(=C/CC(=O)O)C)C)O)\C</chem>                                                                                      | 198                     | Yes              |
| 361                  | 4-Hydroxy-6-(2',4',6'-trioxotridecyl)-2-pyrone                                                          | <chem>CCCCCCCC(=O)CC(=O)CC(=O)Cc1cc(O)cc(=O)o1</chem>                                                                                                   | 199                     | Yes              |
| 362                  | Pladienolide D                                                                                          | <chem>CCC(C(C1OC1CC(C=CC=C(C1OC(=O)CC(O)CCC(C(C=CC1C)OC(=O)C)(C)O)C)(O)C)O</chem>                                                                       | 200                     | No               |
| 363                  | Pladienolide B                                                                                          | <chem>CCC(C(C1OC1CC(C=CC=C(C1OC(=O)CC(O)CCC(C(C=CC1C)OC(=O)C)(C)O)C)C)O</chem>                                                                          | 200                     | Yes              |
| 364                  | Pladienolide                                                                                            | <chem>CCC(C(C1OC1CC(C=CC=C(C1OC(=O)CC(O)CCC(C(CCC1C)O)(C)O)C)C)O</chem>                                                                                 | 200                     | No               |

| Comp No <sup>a</sup> | Name                                                                                                                                                                                                                     | SMILES <sup>b</sup>                                                                                                                                                 | Cluster No <sup>c</sup> | Rep <sup>d</sup> |
|----------------------|--------------------------------------------------------------------------------------------------------------------------------------------------------------------------------------------------------------------------|---------------------------------------------------------------------------------------------------------------------------------------------------------------------|-------------------------|------------------|
| 365                  | Spirofungin A                                                                                                                                                                                                            | <chem>C/C(=C/C[C@H]1O[C@]2(CC[C@@H]1C)CC[C@@H]([C@H](O2)/C=C/C(=C/C(=O)O)/C)/C=C/[C@@H]([C@H](C=C/C(=O)O)C)O</chem>                                                 | 201                     | Yes              |
| 366                  | Reveromycin E                                                                                                                                                                                                            | <chem>CCCCC[C@]1(CC[C@@]2O[C@H]1/C=C/C(=C/C(=O)O)/C)CC[C@@H]([C@H](O2)/C=C/C(=C/[C@@H]([C@H](C=C/C(=O)O)C)O)C)OC(=O)CCC(=O)O</chem>                                 | 202                     | No               |
| 367                  | (2E,4S,5S,6E,8E)-10-[(2S,3R,6S,8R,9S)-2-[(1E,3E)-4-Carboxy-3-methylbuta-1,3-dienyl]-3-(3-carboxypropanoyloxy)-9-methyl-3-(3-methylbutyl)-1,7-dioxaspiro[5.5]undecan-8-yl]-5-hydroxy-4,8-dimethyldeca-2,6,8-trienoic acid | <chem>CC(CC[C@]1(CC[C@@]2O[C@H]1/C=C/C(=C/C(=O)O)/C)CC[C@@H]([C@H](O2)/C=C/C(=C/[C@@H]([C@H](C=C/C(=O)O)C)O)C)OC(=O)CCC(=O)O)C</chem>                               | 202                     | No               |
| 368                  | Reveromycin A                                                                                                                                                                                                            | <chem>CCCC[C@]1(CC[C@@]2O[C@H]1/C=C/C(=C/C(=O)O)/C)CC[C@@H]([C@H](O2)/C=C/C(=C/[C@@H]([C@H](C=C/C(=O)O)C)O)C)OC(=O)CCC(=O)O</chem>                                  | 202                     | No               |
| 369                  | Reveromycin D                                                                                                                                                                                                            | <chem>CCCC[C@]1(CC[C@@]2O[C@H]1/C=C/C(=C/C(=O)O)/C)CC[C@@H]([C@H](O2)/C=C/C(=C/[C@@H]([C@H](C=C/C(=O)O)C)O)C)OC(=O)CCC(=O)O</chem>                                  | 202                     | Yes              |
| 370                  | (2E,6E,8E)-10-[2-Butyl-2-[(2E,4E)-5-carboxy-1-(3-carboxypropanoyloxy)-4-methylpenta-2,4-dienyl]-8-methyl-1,10-dioxaspiro[4.5]decan-9-yl]-5-hydroxy-4,8-dimethyldeca-2,6,8-trienoic acid                                  | <chem>CCCC[C@@]1(CC[C@@]2(O1)CC[C@@H]([C@H](O2)/C=C/C(=C/[C@@H]([C@H](C=C/C(=O)O)C)O)C)C[C@@H](OC(=O)CCC(=O)O)/C=C/C(=C/C(=O)O)/C</chem>                            | 202                     | No               |
| 371                  | Reveromycin                                                                                                                                                                                                              | <chem>CCCC1(CCC2(OC1/C=C/C(=C/C(=O)O)/C)CCC(C(O2)/C=C/C(=C/C(=C/C(=O)O)C)O)\C)C)O</chem>                                                                            | 202                     | No               |
| 372                  | Pyrrolnitrin                                                                                                                                                                                                             | <chem>Clc1c[nH]cc1c1cccc(c1N(=O)=O)Cl</chem>                                                                                                                        | 203                     | Yes              |
| 373                  | Methicillin                                                                                                                                                                                                              | <chem>COc1cccc(c1C(=O)N[C@@H]1C(=O)N2[C@@H]1SC([C@@H]2C(=O)O)(C)C)OC</chem>                                                                                         | 204                     | Yes              |
| 374                  | Xiamenmycin B                                                                                                                                                                                                            | <chem>CC(=CCC[C@]1(C)Oc2ccc(cc2C[C@@H]1O)C(=O)O)C</chem>                                                                                                            | 205                     | Yes              |
| 375                  | Xiamenmycin C                                                                                                                                                                                                            | <chem>CC(=CCC[C@]1(C)Oc2ccc(cc2C[C@@H]1O)C(=O)N)C</chem>                                                                                                            | 205                     | No               |
| 376                  | (S)-Methyl 2-(4-bromobenzamido)butanoate                                                                                                                                                                                 | <chem>CC[C@@H](C(=O)OC)NC(=O)c1ccc(cc1)Br</chem>                                                                                                                    | 206                     | Yes              |
| 377                  | Stubomycin                                                                                                                                                                                                               | <chem>COC1CC2C(=C1O)C(=O)CC(O)CC/C=C/CC(NC(=O)/C=C/C=C/C(=C2)/C)c1cccc1</chem>                                                                                      | 207                     | Yes              |
| 378                  | 2,4,6,8-Nonatetraenamide, N-(2-hydroxy-5-oxo-1-cyclopenten-1-yl)-9-(2-methylphenyl)-, (2E,4E,6E,8E)-                                                                                                                     | <chem>O=C(NC1=C(O)CCC1=O)/C=C/C=C/C=C/C=C/c1cccc1C</chem>                                                                                                           | 208                     | No               |
| 379                  | 4-E-Annimycin                                                                                                                                                                                                            | <chem>CC/C=C/C=C(/C=C/C=C/C(CC(=O)NC1=C(O)CCC1=O)O)C</chem>                                                                                                         | 208                     | No               |
| 380                  | 4-Z-Annimycin                                                                                                                                                                                                            | <chem>CC/C=C/C=C(/C=C/C=C/C(CC(=O)NC1=C(O)CCC1=O)O)C</chem>                                                                                                         | 208                     | Yes              |
| 381                  | Protoasukamycin                                                                                                                                                                                                          | <chem>C/C=C/C=C/C(=O)Nc1cc(/C=C/C=C/C(=O)NC2=C(O)CCC2=O)ccc1O</chem>                                                                                                | 208                     | No               |
| 382                  | 4-Pentenamide, N-(2-hydroxy-5-oxo-1-cyclopenten-1-yl)-5-(2-methylphenyl)-, (4E)-                                                                                                                                         | <chem>O=C(NC1=C(O)CCC1=O)CC/C=C/C1cccc1C</chem>                                                                                                                     | 209                     | Yes              |
| 383                  | Aminoansamycin F                                                                                                                                                                                                         | <chem>O=C1C=C2NC(=O)[C@@H](C)[C@H](O)/C=C/C=C/C[C@H](C(=C1)C2=O)Nc1cccc1C(=O)O</chem>                                                                               | 210                     | Yes              |
| 384                  | Huperzine A                                                                                                                                                                                                              | <chem>C/C=C/1C2C=C(CC1(N)c1c(C2)[nH]c(=O)cc1)C</chem>                                                                                                               | 211                     | Yes              |
| 385                  | Virantmycin B                                                                                                                                                                                                            | <chem>COC[C@@]1(CCC(=C(C)C)C)Nc2ccc(cc2C[C@H]1O)C(=O)NC1=C(O)CCC1=O</chem>                                                                                          | 212                     | Yes              |
| 386                  | Virantmycin C                                                                                                                                                                                                            | <chem>COC[C@@]1([C@@H]1Nc2c(C1)cc(cc2)C(=O)NC1=C(O)CCC1=O)(CCC(=C(C)C)C)O</chem>                                                                                    | 212                     | No               |
| 387                  | Val-geninthiocin                                                                                                                                                                                                         | <chem>C/C=C\1N=C(O)C(N=C(O)c2csc(n2)c2ccc(nc2c2cc(n2)C(=C)N=C(O)C(=C)N=C(c2nc(C(=C)N=C(C(=C)N=C(c3nc1oc3)O)C(C)C)O)cc2C)O)C(=O)NC(=C)C(=NC(=C)C(=N)O)O)C(O)C</chem> | 213                     | Yes              |

| Comp No <sup>a</sup> | Name                                                  | SMILES <sup>b</sup>                                                                                                | Cluster No <sup>c</sup> | Rep <sup>d</sup> |
|----------------------|-------------------------------------------------------|--------------------------------------------------------------------------------------------------------------------|-------------------------|------------------|
| 388                  | Mycophendic acid                                      | <chem>COc1c(CCC(CCC(=O)O)C)c(O)c2c(c1C)COC2=O</chem>                                                               | 214                     | Yes              |
| 389                  | 6,8-Dimethoxy-7-hydroxy-methyl-isocoumarin            | <chem>COc1cc2cc(C)oc(=O)c2c(c1O)OC</chem>                                                                          | 215                     | No               |
| 390                  | 6,7,8-Trimethoxy-3-methylisocoumarin                  | <chem>COc1cc2cc(C)oc(=O)c2c(c1OC)OC</chem>                                                                         | 215                     | No               |
| 391                  | 5,6,8-Trimethoxy-3-methylisocoumarin                  | <chem>COc1cc(OC)c2c(c1OC)cc(oc2=O)C</chem>                                                                         | 215                     | Yes              |
| 392                  | 1H-2-Benzopyran-1-one, 6,8-dimethoxy-3-methyl-        | <chem>COc1cc2cc(C)oc(=O)c2c(c1)OC</chem>                                                                           | 215                     | No               |
| 393                  | 5,6,7,8-Tetramethoxy-3-methyl-isocoumarin             | <chem>COc1c2C[C@@H](C)OC(=O)c2c(c1OC)OC</chem>                                                                     | 215                     | No               |
| 394                  | 6,8-Dimethoxyl-3-methyl-isocoumarin                   | <chem>COc1cc2C[C@@H](C)OC(=O)c2c(c1)OC</chem>                                                                      | 215                     | No               |
| 395                  | Bireticulol                                           | <chem>COc1c(O)c(c2c(O)c(OC)c(c3c2cc(C)oc3=O)O)c2c(c1O)c(=O)oc(c2)C</chem>                                          | 216                     | Yes              |
| 396                  | 1-O-alpha-L-Rhamnosyl-12-hydroxy-8-O-methyltetragulol | <chem>COc1cccc2c1C(=O)c1ccc3c(c1C2O)C(C[C@H](C3)C)O[C@H]1O[C@H](O)[C@@H]([C@H]([C@H]1O)C)O</chem>                  | 217                     | Yes              |
| 397                  | Piceamycin                                            | <chem>O=C1C=CC=CC=CC2(C)CC(=O)C(=C2C(=O)C=CC=CC=CC=CC(CN1)C)O</chem>                                               | 218                     | No               |
| 398                  | Cyclamenol B                                          | <chem>O=C1/C=C/[C@H]2C=C[C@@H]3[C@H]4[C@H]2[C@H]/(C=C/C=C/[C@H](CN1)C)O[C@H]4[C@H](C3)O</chem>                     | 218                     | Yes              |
| 399                  | Cyclamenol C                                          | <chem>O=C1/C=C/[C@H]2C=C[C@H]3[C@H]4[C@H]2[C@H]/(C=C/C=C/[C@H](CN1)C)O[C@H]4[C@H](C3)O</chem>                      | 218                     | No               |
| 400                  | Bombyxamycin B                                        | <chem>O=C1/C=C/C=C/C/[C@@]2(C)O/C(=C/C(=O)/C=C/C=C/C=C/C=C/C/[C@H](CN1)C)/[C@H]([C@H]2O)O</chem>                   | 219                     | Yes              |
| 401                  | Cyclamenol D                                          | <chem>C[C@H]1/C=C/C=C/[C@H]2C=C[C@H]3[C@H]2[C@H]/(C=C/C(=O)CC(=O)NC1)C=CC[C@H]3O</chem>                            | 220                     | Yes              |
| 402                  | Indimicin E                                           | <chem>Cn1cc(c(c1)[C@@]1(C)CN(c2c1cc(Cl)cc2(C)c1c[nH]c2c1cc(Cl)cc2</chem>                                           | 221                     | No               |
| 403                  | Indimicin B                                           | <chem>Clc1ccc2c(c1)[C@@]1(C)c3cn(c(c3c3c([C@H]1N2C)[nH]c1c3cc(cc1)Cl)C)C</chem>                                    | 221                     | Yes              |
| 404                  | Indimicin A                                           | <chem>Cn1cc2c(c1)[C@]1(C)c3cc(Cl)ccc3N([C@H]1c1c2c2cc(Cl)ccc2[nH]1)C</chem>                                        | 221                     | No               |
| 405                  | Indimicin C                                           | <chem>Clc1ccc2c(c1)[C@@]1(C)c3c[nH]c(c3c3c([C@H]1N2C)[nH]c1c3cc(cc1)Cl)C</chem>                                    | 221                     | No               |
| 406                  | Indimicin D                                           | <chem>Clc1ccc2c(c1)[C@@]1(C)c3c[nH]cc3c3c([C@H]1N2C)[nH]c1c3cc(cc1)Cl</chem>                                       | 221                     | No               |
| 407                  | Chloroxaloterpin B                                    | <chem>C=C[C@]1(C)CC=C2[C@H](C1)CC[C@H]1[C@]2(C)CC[C@H](C1(C)C)OC(=O)C(=O)Nc1cccc1Cl</chem>                         | 222                     | No               |
| 408                  | Chloroxaloterpin A                                    | <chem>C=C[C@]1(C)CC=C2[C@H](C1)CC[C@H]1[C@]2(C)CC[C@H](C1(C)C)OC(=O)NC(=O)Nc1cccc1Cl</chem>                        | 222                     | Yes              |
| 409                  | Oxaloterpin B                                         | <chem>OCCNC(=O)NC(=O)COC1CCC2(C(C1(C)C)CCC1C2=CCC(C1)(C)C=C)C</chem>                                               | 222                     | No               |
| 410                  | 5-Hydroxy-4-methylnaphtho[1,2-beta]furan-3-one        | <chem>O=C1COc2c1c(C)c(c1c2cccc1)O</chem>                                                                           | 223                     | Yes              |
| 411                  | 16alpha-Hydroxydehydroepiandrosterone                 | <chem>O[C@H]1CC[C@]2(C(=CC[C@H]3[C@H]2CC[C@]2([C@H]3C[C@H](C2=O)O)C)C1)C</chem>                                    | 224                     | Yes              |
| 412                  | Streptoseolactone                                     | <chem>CC(=CCCC1=C2[C@H](OC1=O)C[C@]1([C@H]2CC[C@H]2[C@]1(C)C(=O)[C@H]([C@H]1[C@]2(C)CC[C@H]([C@H]1C)O)O)C)C</chem> | 225                     | Yes              |
| 413                  | 2,8,10,19-Tetrahydroxy-18-methyldocosanoic acid       | <chem>CCCC(C)(CCCCCCCC(C)(CCCCCCC(C(=O)O)O)O)O)C)O</chem>                                                          | 226                     | No               |
| 414                  | Succinilene B                                         | <chem>CC[C@@H]([C@@H](C/C=C/C=C/C/C[C@H]/(C=C/[C@H]([C@H](OC(=O)CCC(=O)O)C)C)/C)O)O</chem>                         | 226                     | Yes              |
| 415                  | Succinilene A                                         | <chem>CC[C@H]([C@@H](C/C=C/C=C/C=C/C[C@H](C=C[C@H]([C@H](OC(=O)CCC(=O)O)C)C)O)O)O</chem>                           | 226                     | No               |
| 416                  | Succinilene C                                         | <chem>CCC(=O)[C@H](C/C=C/C=C/C=C/C[C@H]/(C=C/[C@H]([C@H](OC(=O)CCC(=O)O)C)C)/C)O</chem>                            | 226                     | No               |
| 417                  | 3,6,8,11-Tetrahydroxy-16,17-dimethyloctadecanoic acid | <chem>OC(CC(CCC(C(=O)O)O)O)CCC(CCCCC(C(C)C)C)O</chem>                                                              | 227                     | Yes              |

| Comp No <sup>a</sup> | Name                                                                            | SMILES <sup>b</sup>                                                                                                                                                                                                                                                                                 | Cluster No <sup>c</sup> | Rep <sup>d</sup> |
|----------------------|---------------------------------------------------------------------------------|-----------------------------------------------------------------------------------------------------------------------------------------------------------------------------------------------------------------------------------------------------------------------------------------------------|-------------------------|------------------|
| 418                  | Frenolicin G                                                                    | <chem>CCC[C@@H]1O[C@@H](CC(=O)O)CC2([C@]1O)C(=O)c1c(O)cccc1C2=O)SC12C[C@@H](CC(=O)O)O[C@@H]([C@]2O)C(=O)c2c(C1=O)cccc2O)CCC</chem>                                                                                                                                                                  | 228                     | Yes              |
| 419                  | (-)-BE-52440A                                                                   | <chem>COC(=O)C[C@@H]1O[C@@H](C)[C@@H]2([C@]1(C1)(S[C@]113C[C@@H](CC(=O)OC)O[C@@H]([C@@]3(O)C(=O)c3c(C1=O)cccc3O)C)C(=O)c1c(C2=O)c(O)ccc1O</chem>                                                                                                                                                    | 228                     | No               |
| 420                  | Chromomycin SA                                                                  | <chem>CO[C@@H]([C@@H]1C2cc3cc(O[C@@H]4C[C@@H](O[C@@H]5C[C@@H](O)[C@@H]([C@@H](O5)C)OC)[C@@H]([C@@H](O4)C)OC(=O)C)c(c3c(c2C(=O)[C@@H]1O[C@@H]1C[C@@H](O[C@@H]2C[C@@H](O[C@@H]3O[C@@H](C)[C@@H]([C@@H](C3)C)O)OC(=O)C)[C@@H]([C@@H](O2)C)O)[C@@H]([C@@H](O1)C)O)O)C)C(=O)O</chem>                     | 229                     | Yes              |
| 421                  | Aburamycin B                                                                    | <chem>CO[C@@H]([C@@H]1C2cc3cc(O[C@@H]4C[C@@H](O[C@@H]5C[C@@H](O)[C@@H]([C@@H](O5)C)OC)[C@@H]([C@@H](O4)C)OC(=O)C)c(c3c(c2C(=O)[C@@H]1O[C@@H]1C[C@@H](O[C@@H]2C[C@@H](O[C@@H]3O[C@@H](C)[C@@H]([C@@H](C3)C)O)OC(=O)C)[C@@H]([C@@H](O2)C)O)[C@@H]([C@@H](O1)C)O)O)C)C(=O)[C@@H]([C@@H](O)C)O</chem>   | 230                     | Yes              |
| 422                  | Chromomycin                                                                     | <chem>CO[C@@H]([C@@H]1C2cc3cc(OC4CC(OC5CC(O)C(C(O5)C)OC)C(C(O4)C)OC(=O)C)c(c3c(c2C(=O)[C@@H]1OC1CC(OC2CC(OC3OC(C)C(C(C3)C)O)OC(=O)C)C(C(O2)C)O)C(C(O1)C)O)O)C)C(=O)[C@@H]([C@@H](O)C)O</chem>                                                                                                       | 231                     | Yes              |
| 423                  | Chromomycin A3-1                                                                | <chem>COC(C1C2cc3cc(OC4CC(OC5CC(O)C(C(O5)C)OC)C(C(O4)C)OC(=O)C)c(c3c(c2C(=O)C1OC1OCC(C(C1)OC1CC(OC2OC(C)C(C(C2)C)O)OC(=O)C)C(C(O1)C)O)O)O)C)C(=O)C(C(O)C)O</chem>                                                                                                                                   | 232                     | Yes              |
| 424                  | Chromomycin A3                                                                  | <chem>CO[C@@H]([C@@H]1C2cc3cc(O[C@@H]4C[C@@H](O[C@@H]5C[C@@H](O)[C@@H]([C@@H](O5)C)OC)[C@@H]([C@@H](O4)C)OC(=O)C)c(c3c(c2C(=O)[C@@H]1O[C@@H]1C[C@@H](O[C@@H]2C[C@@H](O[C@@H]3O[C@@H](C)[C@@H]([C@@H](C3)C)O)OC(=O)C)[C@@H]([C@@H](O2)C)O)[C@@H]([C@@H](O1)C)O)O)C)C(=O)[C@@H]([C@@H](O)C)O</chem>   | 233                     | Yes              |
| 425                  | Chromomycin A2                                                                  | <chem>CO[C@@H]([C@@H]1C2cc3cc(O[C@@H]4C[C@@H](O[C@@H]5C[C@@H](O)[C@@H]([C@@H](O5)C)OC)[C@@H]([C@@H](O4)C)OC(=O)C)c(c3c(c2C(=O)[C@@H]1O[C@@H]1C[C@@H](O[C@@H]2C[C@@H](O[C@@H]3O[C@@H](C)[C@@H]([C@@H](C3)C)O)OC(=O)C)C)[C@@H]([C@@H](O2)C)O)[C@@H]([C@@H](O1)C)O)O)C)C(=O)[C@@H]([C@@H](O)C)O</chem> | 234                     | Yes              |
| 426                  | Chromomycin A2-1                                                                | <chem>COC(C1C2cc3cc(OC4CC(OC5CC(O)C(C(O5)C)OC)C(C(O4)C)OC(=O)C)c(c3c(c2C(=O)C1OC1OCC(C(C1)OC1CC(OC2OC(C)C(C(C2)C)O)OC(=O)C)C(C(O1)C)O)O)O)C)C(=O)C(C(O)C)O</chem>                                                                                                                                   | 235                     | Yes              |
| 427                  | Demethylchromomycin A2                                                          | <chem>COC(C1C2cc3cc(OC4CC(OC5CC(O)C(C(O5)C)OC)C(C(O4)C)OC(=O)C)c(c3c(c2C(=O)C1OC1CC(OC2CC(OC3OC(C)C(C(C3)C)O)OC(=O)C)C(C(C(O2)C)O)C(C(O1)C)O)O)O)C)C(=O)C(C(O)C)O</chem>                                                                                                                            | 236                     | Yes              |
| 428                  | Orinocin                                                                        | <chem>COc1cc([C@@H]2OC/C(=C)cc3ccc(cc3)N(=O)=O)/C2)c(c(=O)c1C)C</chem>                                                                                                                                                                                                                              | 237                     | Yes              |
| 429                  | CHEMBL514407                                                                    | <chem>COc1cc([C@@H]2OC[C@@]3(C2)[C@@H]2C(=CC(=C[C@]2([C@@H]3c2ccc(cc2)N(=O)=O)C)C)C)c(c(=O)c1C)C</chem>                                                                                                                                                                                             | 238                     | Yes              |
| 430                  | CHEMBL459070                                                                    | <chem>COc1cc(C2OC[C@@]3(C2)C2C(=CC(=C[C@]2([C@@H]3c2ccc(cc2)N(=O)=O)C)C)C)c(c(=O)c1C)C</chem>                                                                                                                                                                                                       | 238                     | No               |
| 431                  | Luminacin D                                                                     | <chem>CCCC(C(=O)c1cc(CC(C)C)c(c1O)C=O)O)C1CC(O)C2(C(O1)O)OC2CC</chem>                                                                                                                                                                                                                               | 239                     | No               |
| 432                  | Luminacin                                                                       | <chem>CC[C@@H]1OC21[C@@H](O)CC(O[C@@H]2O)C(C(=O)c1cc(C(C)C)OC)c(c1O)C(=O)O)CC(C)C</chem>                                                                                                                                                                                                            | 239                     | No               |
| 433                  | Migracin A                                                                      | <chem>CCC[C@@H](C(=O)c1cc([C@@H](C(C)C)OCC)c(c1O)C=O)O)[C@@H]1C[C@@H](O)[C@@]2([C@@H](O1)O)O[C@@H]2CC</chem>                                                                                                                                                                                        | 239                     | No               |
| 434                  | Luminacin I                                                                     | <chem>CCCC(C(=O)c1cc(C(C)C)O)c(c1O)C=O)O)C1CC(O)C2(C(O1)O)OC2CC</chem>                                                                                                                                                                                                                              | 239                     | Yes              |
| 435                  | Indinavir                                                                       | <chem>O[C@@H](CN1CCN(C[C@@H]1C(=O)NC(C)(C)Cc1ccnc1)C[C@@H](C(=O)N[C@@H]1[C@@H](O)Cc2c1cccc2)Cc1cccc1</chem>                                                                                                                                                                                         | 240                     | Yes              |
| 436                  | Echoside E                                                                      | <chem>OC(=O)C1OC(Oc2c(O)c(c3cccc3)c3c(c2c2cccc2)n(C)c(=O)s3)C(C(C1O)O)O</chem>                                                                                                                                                                                                                      | 241                     | No               |
| 437                  | Echoside A                                                                      | <chem>COC(=O)C1OC(Oc2c(cc(c(c2O)c2cccc2)O)c2cccc2)C(C(C1O)O)O</chem>                                                                                                                                                                                                                                | 241                     | No               |
| 438                  | Echoside D                                                                      | <chem>OC(=O)C1OC(Oc2c(c3cccc3)c3ncsc3c(c2O)c2cccc2)C(C(C1O)O)O</chem>                                                                                                                                                                                                                               | 241                     | No               |
| 439                  | Echoside C                                                                      | <chem>OC(=O)C1OC(Oc2c(cc(c(c2O)c2cccc2)O)c2cccc2)C(C(C1O)O)O</chem>                                                                                                                                                                                                                                 | 241                     | Yes              |
| 440                  | Echoside B                                                                      | <chem>COc1c(cc(c(c1O)c1cccc1)OC1OC(C(=O)O)C(C(C1O)O)O)c1cccc1</chem>                                                                                                                                                                                                                                | 241                     | No               |
| 441                  | Streptantibin E                                                                 | <chem>OC[C@@H]1O[C@@H](Oc2c(c3cccc3)c(O)cc(c2O)c2cccc2)[C@@H]([C@@H]([C@@H]1O)O)O</chem>                                                                                                                                                                                                            | 241                     | No               |
| 442                  | Streptantibin D                                                                 | <chem>OC[C@@H]1O[C@@H](Oc2c(cc(c(c2O)c2cccc2)OC)c2cccc2)[C@@H]([C@@H]([C@@H]1O)O)O</chem>                                                                                                                                                                                                           | 241                     | No               |
| 443                  | Streptochlorin                                                                  | <chem>Clc1ncoc1c1c[nH]c2c1cccc2</chem>                                                                                                                                                                                                                                                              | 242                     | Yes              |
| 444                  | 9-(4-Aminophenyl)-3,7-dihydroxy-2,4,6-trimethyl-9-oxo-nonanoic acid             | <chem>OC(C(CC(C(C(=O)O)C)O)C)CC(=O)c1ccc(cc1)N</chem>                                                                                                                                                                                                                                               | 243                     | Yes              |
| 445                  | (2E)-11-(4-Aminophenyl)-5,9-dihydroxy-4,6,8-trimethyl-11-oxo-undec-2-enoic Acid | <chem>CC(C(CC(=O)c1ccc(cc1)N)O)CC(C(C(/C=C/C(=O)O)C)O)C</chem>                                                                                                                                                                                                                                      | 243                     | No               |

| Comp No <sup>a</sup> | Name                                                                                               | SMILES <sup>b</sup>                                                                                                                 | Cluster No <sup>c</sup> | Rep <sup>d</sup> |
|----------------------|----------------------------------------------------------------------------------------------------|-------------------------------------------------------------------------------------------------------------------------------------|-------------------------|------------------|
| 446                  | (E)-4-[(2S,3R,5R,6S)-6-[2-(4-Aminophenyl)-2-oxoethyl]-3,5-dimethyloxan-2-yl]pent-2-enoic acid      | <chem>OC(=O)/C=C/C([C@H]1O[C@@H](CC(=O)c2ccc(cc2)N)[C@@H](C[C@H]1C)C)C</chem>                                                       | 244                     | Yes              |
| 447                  | 2-[(2S,3R,5R,6S)-6-[2-(4-Aminophenyl)-2-oxoethyl]-3,5-dimethyl-tetrahydropyran-2-yl]propanoic acid | <chem>OC(=O)C([C@H]1O[C@@H](CC(=O)c2ccc(cc2)N)[C@@H](C[C@H]1C)C)C</chem>                                                            | 244                     | No               |
| 448                  | Pinocembrin chalcone                                                                               | <chem>Oc1cc(O)c(c(c1)O)C(=O)/C=C/c1ccccc1</chem>                                                                                    | 245                     | Yes              |
| 449                  | Anthracimycin                                                                                      | <chem>CC1=CC[C@H]2[C@H](C1)C=C[C@H]1[C@@H]2/C(=C/C(=O)[C@H](C)C(=O)O[C@@H](/C=C/C=C\C[C@H]1C)C)/O</chem>                            | 246                     | Yes              |
| 450                  | Anthracimycin B                                                                                    | <chem>OC1CC(=O)O[C@H](C)/C=C/C=C\C[C@H](C)[C@@H]2[C@H](C(=O)C1)[C@H]1CC=C(C[C@H]1C=C2)C)C</chem>                                    | 247                     | Yes              |
| 451                  | Anthracimycin BII-2619                                                                             | <chem>OC1CC(=O)O[C@H](C)/C=C/C=C\C[C@H](C)[C@@H]2[C@H](C(=O)C1)[C@@H]1[C@@H](C=C2)C(C=C[C@H]1C)C)C</chem>                           | 247                     | No               |
| 452                  | BE-24566B                                                                                          | <chem>Oc1cc(C)c2c(c1)OC1(OC2c2c(C1)cc1c(c2O)C(=O)c2c(C1(C)C)cc(cc2O)O)C</chem>                                                      | 248                     | No               |
| 453                  | Tetarimycin A                                                                                      | <chem>Oc1cc(C)c2c(c1)C(=O)C1=C(C2=O)C(=O)c2c(C1(C)C)cc(cc2O)O</chem>                                                                | 248                     | No               |
| 454                  | Tetarimycin B                                                                                      | <chem>OC1Cc2cc3c(c(c2C(C1)(C)O)O)C(=O)c1c(C3(C)C)cc(cc1O)O</chem>                                                                   | 248                     | Yes              |
| 455                  | Fipronil                                                                                           | <chem>N#Cc1nn(c(c1S(=O)C(F)(F)F)N)c1c(Cl)cc(cc1Cl)C(F)(F)F</chem>                                                                   | 249                     | Yes              |
| 456                  | Fipronil sulfone                                                                                   | <chem>N#Cc1nn(c(c1S(=O)(=O)C(F)(F)F)N)c1c(Cl)cc(cc1Cl)C(F)(F)F</chem>                                                               | 249                     | No               |
| 457                  | CHEMBL373620                                                                                       | <chem>OCC1=C[C@H]2[C@H](CC[C@@]([C@H]2CC1=O)(C)O)C(C)C</chem>                                                                       | 250                     | Yes              |
| 458                  | Scopranone A                                                                                       | <chem>CCC(CC1=C(OC(C1=O)(O)CC)/C(=C/C)/CC)CC</chem>                                                                                 | 251                     | Yes              |
| 459                  | Scopranone C                                                                                       | <chem>CCC(CC1=C(OC(C1=O)(O)C(O)C)C(=CC)CC)CC</chem>                                                                                 | 251                     | No               |
| 460                  | Kandenol A                                                                                         | <chem>O=C1C=C(C)[C@H]2[C@@](C1)(C)C[C@H](C)[C@@H](C2)C(O)(C)C)O</chem>                                                              | 252                     | Yes              |
| 461                  | 1,6,11-Eudesmanetriol                                                                              | <chem>C[C@H]1CC[C@H](C)[C@@]2[C@@H]1[C@H](O)[C@H](CC2)C(O)(C)C)O</chem>                                                             | 253                     | Yes              |
| 462                  | Strepsesquitriol                                                                                   | <chem>C[C@H]1C[C@H](C)[C@@]23[C@]1(O)CC[C@H](C2)C([C@]3(C)O)(C)C)O</chem>                                                           | 253                     | No               |
| 463                  | Actinopolysporin B                                                                                 | <chem>COC(=O)/C=C/C(CC(CC(C(C)O)(O)C)C)/C</chem>                                                                                    | 254                     | Yes              |
| 464                  | ZINC04026203                                                                                       | <chem>CC(C[C@@H]1NC(=O)[C@@H](NC1=O)Cc1ccccc1)C</chem>                                                                              | 255                     | No               |
| 465                  | cyclo(Phe-Phe)                                                                                     | <chem>O=C1N[C@@H](Cc2ccccc2)C(=O)N[C@H]1Cc1ccccc1</chem>                                                                            | 255                     | Yes              |
| 466                  | 3-(1,3-Benzodioxol-5-ylmethyl)-6- isobutyl-2,5-diketopiperazine                                    | <chem>CC(C[C@H]1NC(=O)[C@H](NC1=O)Cc1ccc2c(c1)OCO2)C</chem>                                                                         | 255                     | No               |
| 467                  | Piperafizine B                                                                                     | <chem>O=c1[nH]/c(=C\c2ccccc2)/c(=O)[nH]/c1=C\c1ccccc1</chem>                                                                        | 255                     | No               |
| 468                  | Piperafizine A                                                                                     | <chem>O=c1/c(=C/c2ccccc2)/[nH]c(=O)/c(=C/c2ccccc2)/n1C</chem>                                                                       | 255                     | No               |
| 469                  | Cyclo-I-Trp-I-Phe                                                                                  | <chem>O=C1N[C@@H](Cc2ccccc2)C(=O)N[C@H]1Cc1c[nH]c2c1ccccc2</chem>                                                                   | 255                     | No               |
| 470                  | 3-((1H-indol-3-yl)methyl)-6-benzyl-1,4-dimethylpiperazine-2,5-dione                                | <chem>CN1C(=O)C(Cc2ccccc2)N(C(=O)C1Cc1c[nH]c2c1ccccc2)C</chem>                                                                      | 256                     | No               |
| 471                  | Thaxtomin C                                                                                        | <chem>O=C1N[C@@H](Cc2ccccc2)C(=O)N([C@H]1Cc1c[nH]c2c1c(ccc2)[N+](=O)[O-])C</chem>                                                   | 256                     | No               |
| 472                  | Thaxtomin D                                                                                        | <chem>CN1C(=O)[C@H](Cc2ccccc2)N(C(=O)[C@@H]1Cc1c[nH]c2c1c(ccc2)[N+](=O)[O-])C</chem>                                                | 256                     | Yes              |
| 473                  | Terezine D                                                                                         | <chem>CC(=CCc1ccccc2c1[nH]cc2C[C@@H]1NC(=O)[C@@H](NC1=O)C)C</chem>                                                                  | 257                     | Yes              |
| 474                  | Gloeosporiocide                                                                                    | <chem>CC(CC(NC(=O)CNC(=O)CNC(=O)c1csc(n1)C(Cc1c[nH]c2c1ccccc2)NC(=O)C(NC(=O)c1csc(n1)C(Cc1ccccc1)NC(=O)CNC(=O)c1csc(n1)C)C)C</chem> | 258                     | Yes              |
| 475                  | Galbonolide B                                                                                      | <chem>CC[C@@H]1OC(=O)[C@H](C)C(=O)C(O)(CO)C/C(=C/[C@H](CC(=C)/C=C/1\1C)C)/C</chem>                                                  | 259                     | No               |
| 476                  | Rustmicin                                                                                          | <chem>CO/C1=C\C[C@@H](C)CC(=C)/C=C\1C/[C@@H](OC(=O)[C@@H](C(=O)C(C1)(O)CO)C)CC</chem>                                               | 259                     | No               |
| 477                  | Galbonolide E                                                                                      | <chem>CC[C@@H]1OC(=O)[C@H](C)C(=O)[C@](O)(CO)CC(=O)C[C@H](CC(=C)/C=C/1\1C)C</chem>                                                  | 259                     | No               |
| 478                  | Neorustmicin A                                                                                     | <chem>CC[C@@H]1OC(=O)[C@H](C)C(=O)[C@@](O)(CO)C/C(=C/[C@H](CC(=C)/C=C/1\1C)C)/C</chem>                                              | 259                     | Yes              |



| Comp No <sup>a</sup> | Name                              | SMILES <sup>b</sup>                                                                                                     | Cluster No <sup>c</sup> | Rep <sup>d</sup> |
|----------------------|-----------------------------------|-------------------------------------------------------------------------------------------------------------------------|-------------------------|------------------|
| 479                  | Leptolstatin                      | <chem>OC/C=C//CC(C(C(=O)C)/C=C/C/C=CC/C=C/C/CCC1CC=CC(=O)O1)\C(C)\C(C)O)C)\C</chem>                                     | 260                     | Yes              |
| 480                  | Reductoleptomycin A               | <chem>OC/C=C//CC(C(C(=O)C)/C=C/C/C=CC/C=C/C/C1OC(=O)C=CC1C)\C(C)\C(C)O)C)\C</chem>                                      | 260                     | No               |
| 481                  | Christolane A                     | <chem>CC(C(=O)O)CNC1ccc(cc1Cl)C(=O)O</chem>                                                                             | 261                     | Yes              |
| 482                  | Elaiomycin K                      | <chem>CCCCCCCC/[N+](=N/[C@H](C(=O)O)CO)/O</chem>                                                                        | 262                     | Yes              |
| 483                  | Elaiomycin L                      | <chem>CCCCCCCC/[N+](=N/[C@H](C(=O)O)COC)/O</chem>                                                                       | 262                     | No               |
| 484                  | Verticilactam                     | <chem>O=C1CC(=O)NCC(C)/C=C/C=C\C=C\([C@H]2[C@@H]3[C@H](C1)O[C@@H]1C3C(CC2)[C@@H](C[C@H]1O)O)/C</chem>                   | 263                     | Yes              |
| 485                  | Platensimycin                     | <chem>O=C(Nc1c(O)ccc(c1O)C(=O)O)CC[C@]1(C)C(=O)C=C[C@]23C1C1CC(C2)[C@@](O1)(C3)C</chem>                                 | 264                     | Yes              |
| 486                  | Platencin                         | <chem>O=C(Nc1c(O)ccc(c1O)C(=O)O)CC[C@]1(C)C(=O)C=C[C@]23C1CC(CC2)C(=C)C3</chem>                                         | 264                     | No               |
| 487                  | Platencin A1                      | <chem>O=C(Nc1c(O)ccc(c1O)C(=O)O)CCC1(C)C(=O)C=CC23C1CC(CC3O)C(=C)C2</chem>                                              | 264                     | No               |
| 488                  | Spirotoamide A                    | <chem>CC/C=C\CCCC(C[C@@H]([C@H]1[C@H](O)[C@@H]([C@@]2(O1)C[C@@H](O)[C@@H]([C@H](O2)C)C)C)C)C)/C=C/C(=O)N</chem>         | 265                     | Yes              |
| 489                  | Spirotoamide C                    | <chem>OCC(CC([C@@H]1[C@H](O)[C@@H]([C@@]2(O1)C[C@@H](O)[C@@H]([C@H](O2)C)C)C)C)C/C=C/C(=O)N)CC</chem>                   | 265                     | No               |
| 490                  | Spirotoamide B                    | <chem>CC/C=C\CC(C[C@@H]([C@H]1[C@H](O)[C@@H]([C@@]2(O1)C[C@@H](O)[C@@H]([C@H](O2)C)C)C)C)C)/C=C/C(=O)N</chem>           | 265                     | No               |
| 491                  | Spirotoamide D                    | <chem>OCC(CC([C@H]1[C@H](O)[C@@H]([C@@]2(O1)C[C@@H](O)[C@@H]([C@H](O2)C)C)C)C)CC/C=C/C(=O)N)CC</chem>                   | 265                     | No               |
| 492                  | Chromopyrrolate                   | <chem>OC(=O)c1[nH]c(c(c1c1c[nH]c2c1cccc2)c1c[nH]c2c1cccc2)C(=O)O</chem>                                                 | 266                     | Yes              |
| 493                  | Dichlorochromopyrrolic acid       | <chem>OC(=O)c1[nH]c(c(c1c1c[nH]c2c1cccc2Cl)c1c[nH]c2c1cccc2Cl)C(=O)O</chem>                                             | 266                     | No               |
| 494                  | Dimethyl N1-methylchromopyrrolate | <chem>[nH]1cc(c2c1cccc2)c1c(n(C)c(C(=O)OC)c1c1c[nH]c2c1cccc2)C(=O)OC</chem>                                             | 267                     | No               |
| 495                  | Lycogarubin C                     | <chem>COC(=O)c1[nH]c(c(c1c1c[nH]c2c1cccc2)c1c[nH]c2c1cccc2)C(=O)OC</chem>                                               | 267                     | No               |
| 496                  | IDM G                             | <chem>COC(=O)C1NC(C(=C1c1c[nH]c2c1cccc2)c1c[nH]c2c1cccc2)C(=O)OC</chem>                                                 | 267                     | Yes              |
| 497                  | SPM G                             | <chem>COC(=O)C1NC(C2=C1c1c3cccc3[nH]c1[C@]12CN(c2c1cccc2)C)C(=O)OC</chem>                                               | 267                     | No               |
| 498                  | Lynamycin E                       | <chem>COC(=O)c1[nH]c(c(c1c1c[nH]c2c1cccc2)c1c[nH]c2c1cc(Cl)cc2)C(=O)OC</chem>                                           | 268                     | No               |
| 499                  | Lynamycin G                       | <chem>COC(=O)c1c(c2c[nH]c3c2cc(Cl)cc3)c(c(n1C)C(=O)OC)c1c[nH]c2c1cc(Cl)cc2</chem>                                       | 268                     | No               |
| 500                  | Lynamycin D                       | <chem>COC(=O)c1[nH]c(c(c1c1c[nH]c2c1cc(Cl)cc2)c1c[nH]c2c1cc(Cl)cc2)C(=O)OC</chem>                                       | 268                     | Yes              |
| 501                  | Lynamycin A                       | <chem>COC(=O)c1[nH]cc(c1c1c[nH]c2c1cc(Cl)cc2)c1c[nH]c2c1cc(Cl)cc2</chem>                                                | 268                     | No               |
| 502                  | Lynamycin F                       | <chem>COC(=O)c1n(C)cc(c1c1c[nH]c2c1cc(Cl)cc2)c1c[nH]c2c1cc(Cl)cc2</chem>                                                | 268                     | No               |
| 503                  | Azolemycin A                      | <chem>CC[C@@H]([C@H]([C@H](C(=O)OC)NC(=O)c1nc(oc1C)c1csc(n1)c1nc(oc1C)c1coc(n1)[C@H](C(C)C)NC(=O)/C(=NO)/C(C)C)C</chem> | 269                     | Yes              |
| 504                  | Azolemycin C                      | <chem>CO/N=C\(\C(=O)N[C@H](c1occ(n1)c1nc(c(o1C)c1sc(n1)c1nc(c(o1C)C(=O)N[C@H](C(=O)OC)[C@H](CC)C)C(C)C)/C(C)C</chem>    | 269                     | No               |
| 505                  | Aurantizdicin                     | <chem>CCC(C1NC(=O)C(NC(=O)c2nc(oc2c2cccc2)c2csc(n2)c2nc(c3nc(c4nc(CNC1=O)oc4)oc3)sc2)C(CC)C)C</chem>                    | 270                     | No               |
| 506                  | Urukthapelstatin A                | <chem>CC[C@@H]([C@H]1NC(=O)c2nc(oc2c2cccc2)c2csc(n2)c2csc(n2)c2nc(c3nc(/C=C/C)/NC(=O)[C@@H](NC1=O)C)oc3)oc2)C</chem>    | 270                     | No               |
| 507                  | Curacozole                        | <chem>CCC(C1NC(=O)C(NC(=O)c2nc(oc2c2cccc2)c2csc(n2)c2nc(c3nc(c4nc(CNC1=O)oc4)oc3)sc2)C(C)C)C</chem>                     | 270                     | No               |
| 508                  | Mechercharstatin                  | <chem>CC[C@@H]([C@H]1NC(=O)c2nc(oc2c2cccc2)c2coc(n2)c2csc(n2)c2nc(c3nc(C(=C)NC(=O)[C@@H](NC1=O)C(C)C)oc3)oc2)C</chem>   | 270                     | Yes              |
| 509                  | YM-216391                         | <chem>CC[C@H]([C@H]1NC(=O)c2nc(oc2c2cccc2)c2csc(n2)c2coc(n2)c2nc(c3nc(CNC(=O)[C@@H](NC1=O)C(C)C)oc3)oc2)C</chem>        | 270                     | No               |
| 510                  | Marthiapeptide A                  | <chem>CC[C@@H]([C@H]1NC(=O)[C@@H](Cc2cccc2)NC(=O)[C@@H]2CSC(=N2)c2csc(c3nc(c4nc([C@H](NC1=O)C)sc4)sc3)n2)C</chem>       | 271                     | Yes              |
| 511                  | Violapyrone Q                     | <chem>COc1cc(CCCC(C)C)oc(=O)c1C</chem>                                                                                  | 272                     | No               |
| 512                  | Violapyrone R                     | <chem>COc1cc(CCCCC(C)C)oc(=O)c1C</chem>                                                                                 | 272                     | Yes              |
| 513                  | Violapyrone T                     | <chem>CCC(CCCCc1cc(OC)c(c(=O)o1)C)C</chem>                                                                              | 272                     | No               |
| 514                  | CHEMBL3087380                     | <chem>COc1cc(CCCCC(O)(C)C)oc(=O)c1C</chem>                                                                              | 272                     | No               |
| 515                  | Violapyrone S                     | <chem>CCCCCCCc1cc(OC)c(c(=O)o1)C</chem>                                                                                 | 272                     | No               |

| Comp No <sup>a</sup> | Name                                                       | SMILES <sup>b</sup>                                                                                                                             | Cluster No <sup>c</sup> | Rep <sup>d</sup> |
|----------------------|------------------------------------------------------------|-------------------------------------------------------------------------------------------------------------------------------------------------|-------------------------|------------------|
| 516                  | Violapyrone H                                              | <chem>CC(CCCCCc1cc(O)c(c(=O)o1)C)C</chem>                                                                                                       | 273                     | Yes              |
| 517                  | Violapyrone C                                              | <chem>CC[C@@H](CCCCc1cc(O)c(c(=O)o1)C)C</chem>                                                                                                  | 273                     | No               |
| 518                  | Presuficidin A                                             | <chem>CC(CCCCc1cc(O)c(c(=O)o1)C)C</chem>                                                                                                        | 273                     | No               |
| 519                  | Violapyrone I                                              | <chem>CCCCCCCc1cc(O)c(c(=O)o1)C</chem>                                                                                                          | 273                     | No               |
| 520                  | Violapyrone L                                              | <chem>CC(C(CCCc1cc(O)c(c(=O)o1)C)O)C</chem>                                                                                                     | 273                     | No               |
| 521                  | Violapyrone M                                              | <chem>CCC(CCCCc1cc(O)c(c(=O)o1)C)(O)C</chem>                                                                                                    | 273                     | No               |
| 522                  | CHEMBL3087386                                              | <chem>Oc1cc(CCCCC(O)(C)C)oc(=O)c1C</chem>                                                                                                       | 273                     | No               |
| 523                  | Streptcytosine L                                           | <chem>C[C@H]1O[C@H](CC[C@@H]1O)n1ccc(nc1=O)NC(=O)CC=C(C)C</chem>                                                                                | 274                     | Yes              |
| 524                  | 40551-G                                                    | <chem>CCC(/C=C/C(=O)Nc1ccn(c(=O)n1)[C@H]1CC[C@@H]([C@H](O1)C)OC1C[C@H](O)[C@@H]([C@H](O1)C)N(C)C)C</chem>                                       | 275                     | Yes              |
| 525                  | Indolizomycin                                              | <chem>C/C=C(/C=C/C=C/[C@H]1[C@@H]2[C@H]2[C@H]2[C@H]2N1CC[C@@H]1[C@H]2O1)O)C</chem>                                                              | 276                     | Yes              |
| 526                  | Cyclizidine G                                              | <chem>OCC/C=C/C=C/[C@H]1N2CCCC[C@@H]2[C@H]([C@H]1O)(C)O)C</chem>                                                                                | 277                     | Yes              |
| 527                  | Cyclizidine B                                              | <chem>C/C(=C/[C@@H]1N2CCCC[C@@H]2[C@H]([C@H]1O)(C)O)/C=C/C1CC1</chem>                                                                           | 278                     | Yes              |
| 528                  | Cyclizidine                                                | <chem>C/C(=C/[C@@H]1N2CC[C@@H]3[C@H]([C@@H]2[C@H]([C@H]1O)(C)O)O3)/C=C/C1CC1</chem>                                                             | 278                     | No               |
| 529                  | 19-Hydroxyl-24-methyl ester-N,N-dixiamycin                 | <chem>COC(=O)[C@]1(C)[C@@H](O)CC[C@]2([C@H]1CCc1c2cc2c(c1)n(c1c2cccc1)n1c2cccc2c2c1cc1C[C@@H]3[C@H](c1c2)(C)CC[C@@H]([C@@]3(C)C(=O)O)O)C</chem> | 279                     | Yes              |
| 530                  | Dixiamycin B                                               | <chem>OC(=O)[C@]1(C)[C@@H](O)CC[C@]2([C@H]1CCc1c2cc2c(c1)n(c1c2cccc1)n1c2cccc2c2c1cc1CC[C@@H]3[C@H](c1c2)(C)CC[C@@H]([C@@]3(C)C(=O)O)O)C</chem> | 279                     | No               |
| 531                  | Austradixanthone                                           | <chem>OCc1cc(O)c2c(c1)oc1c(c2=O)c(C)cc(c1Oc1c(O)cc(c2c1oc1c(O)c(O)c(c1c2=O)OC)O)C)O</chem>                                                      | 280                     | Yes              |
| 532                  | Cyanosporaside C                                           | <chem>N#CCc1cc(Cl)c2c(c1)[C@@]1(OC3OC(C)C(C(=O)C3O)(C)OC(=O)C)[C@@H](O)C=CC1=C2</chem>                                                          | 281                     | No               |
| 533                  | Cyanosporaside B                                           | <chem>N#CCc1cc(Cl)c2c(c1)[C@@]1(OC3OC(C)C(C(=O)C3O)(C)O)[C@@H](O)C=CC1=C2</chem>                                                                | 281                     | Yes              |
| 534                  | Cyanosporaside A                                           | <chem>N#CCc1ccc2c(c1Cl)[C@@]1(OC3OC(C)C(C(=O)C3O)(C)O)[C@@H](O)C=CC1=C2</chem>                                                                  | 281                     | No               |
| 535                  | Cyanosporaside F                                           | <chem>N#CCc1ccc2c(c1Cl)[C@@]1(O)[C@H](C=CC1=C2)OC1OC(C)C(CC1SCCNC(=O)C)O</chem>                                                                 | 282                     | Yes              |
| 536                  | Kobutimycin A                                              | <chem>CC(=O)OC(C(/C=C/C1/C=C(C2=NCCC3C12O3)C)OC(=O)C(C)C)C</chem>                                                                               | 283                     | Yes              |
| 537                  | Kobutimycin B                                              | <chem>CCC(C(=O)OC(C(OC(=O)C)C)/C=C1/C=C(C2=NCCC3C12O3)C)C</chem>                                                                                | 283                     | No               |
| 538                  | 5OE+/-, 10OE+/-, 11-trihydroxyamorphane-3-one              | <chem>O=C1C[C@H]2[C@@H]([C@@H]([C@H]1C)O)[C@H](CC[C@@]2(C)O)C(O)(C)C</chem>                                                                     | 284                     | Yes              |
| 539                  | 5alpha,10alpha,11-Trihydroxyamorphane-3-one                | <chem>O=C1C[C@H]2[C@@H]([C@@H]([C@H]1C)O)[C@H](CC[C@@]2(C)O)C(O)(C)C</chem>                                                                     | 284                     | No               |
| 540                  | (2alpha,4beta,5beta,7beta,10alpha)-2,5,11-Eudesmanetriol   | <chem>O[C@H]1C[C@H](C)[C@@]2([C@](C1)(C)CC[C@H](C2)C(O)(C)C)O</chem>                                                                            | 284                     | No               |
| 541                  | (1alpha,4alpha,5beta,7alpha,10alpha)-1,5,11-Eudesmanetriol | <chem>C[C@H]1CC[C@@H]([C@@]2([C@]1(O)C[C@H](CC2)C(O)(C)C)O</chem>                                                                               | 285                     | Yes              |
| 542                  | Fumonisin B2                                               | <chem>CCCC[C@H]([C@H]([C@@H](OC(=O)C[C@H](C(=O)O)CC(=O)O)C[C@H](CCCCC[C@H]([C@@H]([C@@H](N)C)O)O)C)OC(=O)C[C@H](C(=O)O)CC(=O)O)C</chem>         | 286                     | Yes              |
| 543                  | Caerulomycin D                                             | <chem>O/N=C/c1cc2OC3(O)C(Oc2c(n1)c1ccccn1)(C)OC(C(C3)O)(C)OC(C)C</chem>                                                                         | 287                     | Yes              |
| 544                  | Heronamide E                                               | <chem>C/C=C/C=C/[C@H]1NC(=O)[C@H]2[C@H](C1)/C=C/C(=C/[C@@H]1[C@H]2[C@H]([C@@H]([C@@H](C=C1)O)/C</chem>                                          | 288                     | Yes              |
| 545                  | Heronamide D                                               | <chem>C/C=C/C=C/[C@H]1C[C@@H]([C@@H]([C@@H]2N1C(=O)[C@@H]1[C@H]2/C(=C/[C@H]2C=C[C@H]([C@@H]([C@@H]2/C(=C/C=C1)C)O)/C)O</chem>                   | 289                     | Yes              |
| 546                  | Ethyl iso-allocholate                                      | <chem>CCOC(=O)CC[C@H]([C@H]1CC[C@@H]2[C@]1(C)[C@@H](O)C[C@H]1[C@H]2[C@H](O)C[C@H]2[C@]1(C)CC[C@H](C2)O)C</chem>                                 | 289                     | No               |
| 547                  | Antibiotic FR 900848                                       | <chem>O=C1CCN(C(=O)N1)[C@@H]1O[C@H]([C@H]([C@H]1O)O)CNC(=O)/C=C/C=C/[C@@H]1CC1C1CC1C1C[C@H]1/C=C/[C@@H]1C[C@H]1C</chem>                         | 290                     | Yes              |
| 548                  | 3-Hydroxy-7-methoxy-K252c                                  | <chem>COC1NC(=O)c2c1c1c(c3c2c2cc(O)ccc2[nH]3)[nH]c2c1cccc2</chem>                                                                               | 291                     | No               |
| 549                  | 9-Hydroxy-K252c                                            | <chem>Oc1ccc2c(c1)c1c3CNC(=O)c3c3c(c1[nH]2)[nH]c1c3cccc1</chem>                                                                                 | 291                     | No               |
| 550                  | 3-Hydroxy-K252c                                            | <chem>Oc1ccc2c(c1)c1c3C(=O)NCc3c3c(c1[nH]2)[nH]c1c3cccc1</chem>                                                                                 | 291                     | Yes              |

| Comp No <sup>a</sup> | Name                                                                                        | SMILES <sup>b</sup>                                                                                                                                                             | Cluster No <sup>c</sup> | Rep <sup>d</sup> |
|----------------------|---------------------------------------------------------------------------------------------|---------------------------------------------------------------------------------------------------------------------------------------------------------------------------------|-------------------------|------------------|
| 551                  | Staurosporine aglycone                                                                      | <chem>O=C1NCc2c1c1c([nH]c3c1cccc3)c1c2c2ccccc2[nH]1</chem>                                                                                                                      | 291                     | No               |
| 552                  | Arcyriaflavin A                                                                             | <chem>O=c1[nH]c(=O)c2c1c1c3ccccc3[nH]c1c1c2c2ccccc2[nH]1</chem>                                                                                                                 | 291                     | No               |
| 553                  | IDM F                                                                                       | <chem>O=C1N(C)[C@@](C2=C1[C@]1(C)c3ccccc3N([C@@H]1c1c2c2ccccc2[nH]1)C)(C)O</chem>                                                                                               | 292                     | Yes              |
| 554                  | EM18                                                                                        | <chem>Oc1cc(=O)cc(o1)[C@H]1c2cccc(c2C(=O)C[C@@]1(C)O)O</chem>                                                                                                                   | 293                     | Yes              |
| 555                  | Octoketide 4b                                                                               | <chem>Oc1cc2OC(O)(Cc3oc(O)cc(=O)c3)CC(=O)c2c(c1)C</chem>                                                                                                                        | 293                     | No               |
| 556                  | SEK34                                                                                       | <chem>O=c1cc(oc(c1)O)Cc1cccc2c1C(=O)CC(O2)(C)O</chem>                                                                                                                           | 294                     | Yes              |
| 557                  | SEK34b                                                                                      | <chem>CC1CC(=O)c2c(O1)cccc2Cc1cc(=O)cc(o1)O</chem>                                                                                                                              | 294                     | No               |
| 558                  | 5,10-Dihydrophencomycin                                                                     | <chem>COC(=O)c1cccc2c1[nH]c1cccc(c1[nH]2)C(=O)O</chem>                                                                                                                          | 295                     | Yes              |
| 559                  | 10T024A                                                                                     | <chem>OC(=O)Cn1c2cccc(c2[nH]c2c1cccc2)C(=O)O</chem>                                                                                                                             | 295                     | No               |
| 560                  | Endophenazine C                                                                             | <chem>CC(=CCc1cccc2c1[nH]c1c(cccc1n2C)C(=O)O)C</chem>                                                                                                                           | 296                     | Yes              |
| 561                  | Endophenazine D                                                                             | <chem>OC(=O)COC(=O)c1cccc2c1[nH]c1cccc1[nH]2</chem>                                                                                                                             | 296                     | No               |
| 562                  | Antartan                                                                                    | <chem>C[C@H]1C[C@H](C2=C(C([C@@H]3C[C@]12CC3)(C)C)Nc1cccc1C(=O)O</chem>                                                                                                         | 297                     | Yes              |
| 563                  | Pravastatin                                                                                 | <chem>CC[C@@H](C(=O)O)[C@H]1C[C@H](O)C=C2C1[C@@H](CC[C@H](C[C@H](CC(=O)O)O)O)[C@H](C=C2)C</chem>                                                                                | 298                     | Yes              |
| 564                  | Pulvomycin                                                                                  | <chem>COC1C(OC(C/C=C/C=C/C=C/C(=O)C(C(C2C/C=C/C=C/C=C/C(C)O)C(=O)/C(=C/C=C/C(=C/C/C(=C/C/C(=O)O2)/C)O)/C(C)C)O)C)OC(C(C1O)OC)C</chem>                                           | 299                     | Yes              |
| 565                  | FW-04-806                                                                                   | <chem>C[C@H]1C[C@@H](C)[C@H](Cc2cnco2)OC(=O)C(=C[C@H](C[C@H]([C@@H](OC(=O)C(=C1)C)C1cnco1)C)C</chem>                                                                            | 300                     | Yes              |
| 566                  | Conglobatin                                                                                 | <chem>C[C@H]1C[C@H](C)[C@H](Cc2cnco2)OC(=O)/C(=C[C@H](C[C@H]([C@@H](OC(=O)C(=C1)C1cnco1)C)C)/C</chem>                                                                           | 300                     | No               |
| 567                  | Cremimycin                                                                                  | <chem>CCCCCCC1CC(=O)CCCC(O)CC(=O)C2=C(O)C(CC2/C=C/C=C/C=C(=O)N1)C)OC1CC(OC)C(C(O1)C)O</chem>                                                                                    | 301                     | Yes              |
| 568                  | Antibiotic WS5995A                                                                          | <chem>COc1cc(C)cc2c1c1C(=O)c3cccc(c3C(=O)c1oc2=O)O</chem>                                                                                                                       | 302                     | Yes              |
| 569                  | Antibiotic WS 5995B                                                                         | <chem>COc1cc(C)cc(c1C1=CC(=O)c2c(C1=O)cccc2O)C(=O)O</chem>                                                                                                                      | 302                     | No               |
| 570                  | Epothilone B                                                                                | <chem>O=C1O[C@@H](CC2O[C@]2(C)CCC[C@@H]([C@@H]([C@H](C=O)C([C@H](C1)O)(C)C)O)C)/C(=C/c1csc(n1)C)/C</chem>                                                                       | 303                     | Yes              |
| 571                  | Epothilone A                                                                                | <chem>O=C1O[C@@H](C[C@@H]2O[C@@H]2CCC[C@@H]([C@@H]([C@H](C=O)C([C@H](C1)O)(C)C)O)O)/C(=C/c1csc(n1)C)/C</chem>                                                                   | 303                     | No               |
| 572                  | Desoxyepothilone B                                                                          | <chem>O=C1O[C@@H](C/C=C/C(C)CCC[C@@H]([C@@H]([C@H](C=O)C([C@H](C1)O)(C)C)O)C)/C(=C/c1csc(n1)C)/C</chem>                                                                         | 304                     | Yes              |
| 573                  | Delaminomycin C                                                                             | <chem>CCC(C/C=C/C=C/C(CC1C=CC2C(C1(C)/C(=C/1C(=O)CNC1=O)/O)C(C)CC(C2)C)O)C)O</chem>                                                                                             | 305                     | Yes              |
| 574                  | Delaminomycin B                                                                             | <chem>CCC(C/C=C/C=C/C(CC1C=CC2C(C1(C)/C(=C/1C(=O)NC(C1=O)OC)/O)C(C)CC(C2)C)O)C)O</chem>                                                                                         | 305                     | No               |
| 575                  | Delaminomycin A                                                                             | <chem>CCC(C/C=C/C=C/C(CC1C=CC2C(C1(C)/C(=C/1C(=O)NC(C1=O)O)/O)C(C)CC(C2)C)O)C)O</chem>                                                                                          | 305                     | No               |
| 576                  | Actinoranone                                                                                | <chem>COc1cc(OC)c2c(c1)[C@@H](CCC2=O)[C@@H]/C=C/[CC[C@@H]1C=CC[C@H]2[C@@]1(C)CC(C2)C(C)C)O</chem>                                                                               | 306                     | Yes              |
| 577                  | Distamycin                                                                                  | <chem>CC(COC1ccc(cc1Cn1nc(cc1C)NC(=O)c1ccc(cc1)CN1CCCC1)Cl)C</chem>                                                                                                             | 307                     | Yes              |
| 578                  | Physostigmine                                                                               | <chem>CNC(=O)Oc1ccc2c(c1)[C@]1(C)CCN([C@@H]1N2C)C</chem>                                                                                                                        | 308                     | Yes              |
| 579                  | FR-008-III                                                                                  | <chem>OC1CC(O)CC(=O)CCCC(=O)CC(=O)OC(C(CC(C(CC(=O)c2ccc(cc2)N)O)C)C(C)/C=C/C=C/C=C/C=C/C=C/C=C/C(C2OC(CC(C1)O)(O)CC(O)C2C(=O)O)OC1O[C@H](C)[C@H]([C@@H]([C@@H]1O)N)O</chem>     | 309                     | Yes              |
| 580                  | CS103                                                                                       | <chem>OC1CC(=O)CCCC(O)CC(=O)OC(C(CC(C(CC(=O)c2ccc(cc2)N)O)C)C(C)/C=C/C=C/C=C/C=C/C=C/C=C/C(C2OC(C(CC(C1)O)O)(O)CC(O)C2C)OC1O[C@H](C)[C@H]([C@@H]([C@@H]1O)N)O</chem>            | 310                     | Yes              |
| 581                  | Candidin D                                                                                  | <chem>OC1CC(O)CC(=O)CCCC(=O)CC(=O)OC(C(CC(C(CC(=O)c2ccc(cc2)N)O)C)C(C)/C=C/C=C/C=C/C=C/C=C/C=C/C(C2OC(C(CC(C1)O)O)C(=O)O)O[C@@H]1OC(C)[C@H]([C@H](C1O)N)O</chem>                | 311                     | Yes              |
| 582                  | Trichomycin A                                                                               | <chem>OC1CCCC(O)CC(O)CC2(O)CC(O)C(C(O2)CC/C=C/C=C/C=C/C=C/C=C/C=C/C(C(OC(=O)CC(=O)CC(C1)O)C(CCC(CC(=O)c1ccc(cc1)N)O)C)O)[C@@H]1O[C@H](C)[C@H]([C@@H]([C@@H]1O)N)O)C(=O)O</chem> | 312                     | Yes              |
| 583                  | (1S,3R,5Z,7Z,11S,13Z,15Z,17Z,19Z,21S,23R,24S,25R)-21-((3S,4R,5R,6S)-4-amino-tetrahydro-3,5- | <chem>C[C@H]1C/C=C/C=C/C=C/C=C/C[C@H](C[C@H]2O[C@](C[C@H](C/C=C/C=C/C(=O)O1)O)(O)C[C@H]([C@@H]2C)O)OC1O[C@H](C)[C@H]([C@H]([C@@H]1O)N)O</chem>                                  | 313                     | No               |

| Comp No <sup>a</sup> | Name                                                                                                                                                                                                                                         | SMILES <sup>b</sup>                                                                                                                                                 | Cluster No <sup>c</sup> | Rep <sup>d</sup> |
|----------------------|----------------------------------------------------------------------------------------------------------------------------------------------------------------------------------------------------------------------------------------------|---------------------------------------------------------------------------------------------------------------------------------------------------------------------|-------------------------|------------------|
|                      | dihydroxy-6-methyl-2H-pyran-2-yloxy)-1,3,25-trihydroxy-11,24-dimethyl-10,27-dioxabicyclo[21.3.1]heptacos a-5,7,13,15,17,19-hexaen-9-one                                                                                                      |                                                                                                                                                                     |                         |                  |
| 584                  | 4,5-Desepoxy-12-decarboxy-12-methyl pimaricin                                                                                                                                                                                                | <chem>C[C@@H]1C/C=C/C=C/C=C/C=C/[C@H](C[C@@H]2O[C@@](C[C@H](C/C=C/C=C/C(=O)O1)O)(O)C[C@@H]([C@H]2C)O)O[C@@H]1O[C@H](C)[C@H]([C@@H]([C@@H]1O)N)O</chem>              | 313                     | Yes              |
| 585                  | 2-Hydro-3-hydroxy-4,5-desepoxy-12-decarboxy-12-methyl pimaricin                                                                                                                                                                              | <chem>O[C@H]1C=C/C[C@H](O)C[C@@]2(O)C[C@H](O)[C@H]([C@@H](O2)C[C@H](/C=C/C=C/C=C/C=C/C[C@H](OC(=O)C1)C)O[C@@H]1O[C@H](C)[C@H]([C@@H]([C@@H]1O)N)O)C</chem>          | 313                     | No               |
| 586                  | (1S,3R,5Z,7S,11S,13Z,15Z,17Z,19Z,21S,23R,24S,25R)-21-((3S,4R,5R,6S)-4-amino-tetrahydro-3,5-dihydroxy-6-methyl-2H-pyran-2-yloxy)-1,3,7,25-tetrahydroxy-11,24-dimethyl-10,27-dioxabicyclo[21.3.1]heptacos a-5,13,15,17,19-pentaen-9-one        | <chem>O[C@@H]1C=C/C[C@H](O)C[C@@]2(O)C[C@H](O)[C@H]([C@H](O2)C[C@H](/C=C/C=C/C=C/C=C/C[C@H](OC(=O)C1)C)OC1O[C@@H](C)[C@H]([C@@H]([C@@H]1O)N)O)C</chem>              | 313                     | No               |
| 587                  | 2-Decarboxy-12-methyl pimaricin                                                                                                                                                                                                              | <chem>C[C@@H]1C/C=C/C=C/C=C/C=C/[C@H](C[C@@H]2O[C@@](C[C@H](C[C@@H]3[C@@H](/C=C/C(=O)O1)O3)O)(O)C[C@@H]([C@H]2C)O)O[C@@H]1O[C@H](C)[C@H]([C@@H]([C@@H]1O)N)O</chem> | 314                     | Yes              |
| 588                  | (1S,3R,5S,7S,8Z,12S,14Z,16Z,18Z,20Z,22S,24R,25S,26R)-22-(((3S,4R,5R,6S)-4-amino-3,5-dihydroxy-6-methyloxan-2-yl)oxy)-1,3,26-trihydroxy-12,25-dimethyl-6,11,28-trioxatricyclo[22.3.1.0 <sup>5,7</sup> ]octacos a-8,14,16,18,20-pentaen-10-one | <chem>C[C@H]1C/C=C/C=C/C=C/C=C/[C@H](C[C@H]2O[C@@](C[C@@H](C[C@H]3[C@@H](/C=C/C(=O)O1)O3)O)(O)C[C@H]([C@@H]2C)O)OC1O[C@@H](C)[C@H]([C@H]([C@@H]1O)N)O</chem>        | 314                     | No               |
| 589                  | 4,5-de-Epoxynatamycin                                                                                                                                                                                                                        | <chem>CC1CCCCCCCCC(OC2O[C@H](C)[C@H]([C@@H]([C@H]2O)N)O)CC2CC(CC(CCCCCC(=O)O1)O)(O)CC(C2C(=O)O)O</chem>                                                             | 315                     | Yes              |
| 590                  | Rimocidin B                                                                                                                                                                                                                                  | <chem>CCCC1C/C=C/C=C/C=C/C=C/C(OC2O[C@H](C)[C@H]([C@@H]([C@H]2O)N)O)CC2OC(CC(CC(=O)CC(C(C(=O)O1)CC)O)O)(O)CC(C2C(=O)N)O</chem>                                      | 316                     | Yes              |
| 591                  | Pyrisulfoxin A                                                                                                                                                                                                                               | <chem>COSc1c(OC)cc(nc1C=N/O)c1cccn1</chem>                                                                                                                          | 317                     | Yes              |
| 592                  | Coprismycin B                                                                                                                                                                                                                                | <chem>O/N=C\c1nc(cc(c1SC)OC)c1ccccc1</chem>                                                                                                                         | 317                     | No               |
| 593                  | Caerulomycin B                                                                                                                                                                                                                               | <chem>O/N=C/c1cc(OC)c(c(n1)c1cccn1)O</chem>                                                                                                                         | 317                     | No               |
| 594                  | Tuberine                                                                                                                                                                                                                                     | <chem>OC(C1(C)CCC(O1)C(OC(=O)C)(C)C)COc1ccc(cc1)CCNC(=O)c1ccccc1</chem>                                                                                             | 318                     | Yes              |
| 595                  | CHEMBL91194                                                                                                                                                                                                                                  | <chem>CCCCC1=C(C)C(=O)[C@](C1=O)(C)CN1c2ccccc2[C@]2(C1OCC2)O</chem>                                                                                                 | 319                     | Yes              |
| 596                  | Piperazinomycin                                                                                                                                                                                                                              | <chem>Oc1ccc2cc1Oc1ccc(cc1)CC1NCC(C2)NC1</chem>                                                                                                                     | 320                     | Yes              |
| 597                  | Argimycins PII                                                                                                                                                                                                                               | <chem>C/C(=C/C=C\1/C=Cc2c1cccn2)/SC[C@H](C(=O)O)NC(=O)C</chem>                                                                                                      | 321                     | Yes              |
| 598                  | Argimycin PI                                                                                                                                                                                                                                 | <chem>C/C(=C\C=C/1/C=Cc2c1cccn2)/SC[C@@H](C(=O)O)NC(=O)C</chem>                                                                                                     | 321                     | No               |
| 599                  | C09245                                                                                                                                                                                                                                       | <chem>Clc1ccc2c(c1)[nH]c1c2cc(s1)C(=O)N</chem>                                                                                                                      | 322                     | Yes              |
| 600                  | Albocycline D                                                                                                                                                                                                                                | <chem>O=C1C=C/[C@](C)(O)/C=C/[C@H](O)C(=C)C(CC[C@@H]([C@H](O1)C)C)O</chem>                                                                                          | 323                     | No               |
| 601                  | Albocycline B                                                                                                                                                                                                                                | <chem>O=C1O[C@H](C)[C@@H](C)CC/C=C/[C@H](/C=C/[C@@](C(C1O)(C)O)O)\C</chem>                                                                                          | 323                     | No               |
| 602                  | 2,3-Dihydrocineromycin B                                                                                                                                                                                                                     | <chem>O=C1CC[C@](C)(O)/C=C/[C@H](O)/C(=C)CC[C@@H]([C@H](O1)C)C)/C</chem>                                                                                            | 323                     | No               |

| Comp No <sup>a</sup> | Name                                                                                                                                                                                          | SMILES <sup>b</sup>                                                                                                            | Cluster No <sup>c</sup> | Rep <sup>d</sup> |
|----------------------|-----------------------------------------------------------------------------------------------------------------------------------------------------------------------------------------------|--------------------------------------------------------------------------------------------------------------------------------|-------------------------|------------------|
| 603                  | Oxycineromycin B                                                                                                                                                                              | <chem>OCC1=CCCC(C)C(C)OC(=O)CCC(C=CC1O)(C)O</chem>                                                                             | 323                     | No               |
| 604                  | Cineromycin B                                                                                                                                                                                 | <chem>O=C1/C=C/[C@](C)(O)/C=C/[C@H](O)/C(=C)CC[C@H]([C@H](O1)C)C)/C</chem>                                                     | 323                     | No               |
| 605                  | 7-O-Demethylalbocycline                                                                                                                                                                       | <chem>O=C1/C=C/[C@](C)(O)/C=C/[C@H](O)/C(=C)CC[C@H]([C@H](O1)C)C)/C</chem>                                                     | 323                     | Yes              |
| 606                  | Platensimycin B4                                                                                                                                                                              | <chem>OCC1OC(Oc2ccc(c(c2NC(=O)CCC(C(=O)/C=C/[C@]23C[C@H]4[C@@](C2)(C)O[C@H](C3C)C4)(C)C)O)C(=O)O)C(C(C1O)O)O</chem>            | 324                     | No               |
| 607                  | Platencin A14                                                                                                                                                                                 | <chem>OCC1OC(Oc2ccc(c(c2NC(=O)CCC(C(=O)/C=C/C23CCC(C(=C)C2)C[C@H]3O)(C)C)O)CO)C(C(C1O)O)O</chem>                               | 324                     | Yes              |
| 608                  | Platencin A13                                                                                                                                                                                 | <chem>OCC1OC(Oc2ccc(c(c2NC(=O)CCC(C(=O)CCC23CCC(CC2)C(=C)C3)(C)C)O)CO)C(C(C1O)O)O</chem>                                       | 324                     | No               |
| 609                  | Platencin A9                                                                                                                                                                                  | <chem>OCC1OC(Oc2ccc(c(c2NC(=O)CCC(C(=O)/C=C/C23CCC(C(=C)C2)CC3O)(C)C)O)C(=O)SC)C(C(C1O)O)O</chem>                              | 324                     | No               |
| 610                  | Platencin A10                                                                                                                                                                                 | <chem>OCC1OC(Oc2ccc(c(c2NC(=O)CCC(C(=O)/C=C/C23CCC(C(=C)C2)CC3O)(C)C)O)C(=O)OC)C(C(C1O)O)O</chem>                              | 324                     | No               |
| 611                  | Platencin A15                                                                                                                                                                                 | <chem>OCC1OC(Oc2ccc(c(c2NC(=O)CCC(C(=O)/C=C/C23CCC(CC2)C(=C)[C@@H]3O)(C)C)O)CO)C(C(C1O)O)O</chem>                              | 324                     | No               |
| 612                  | 3-[2,5'-Diethyl-5'-(1-hydroxyethyl)-4-methyl-[2,2'-bioxolan]-5-yl]-6-hydroxy-9-(3-hydroxy-2-{4-[(methoxymethyl)amino]butanoyl}-4-methylphenyl)-5,7-dimethylnonan-4-one                        | <chem>COCNCCCC(=O)c1c(CCC(C(C(C(=O)C(C2OC(CC2C)(CC)C2CCC(O2)(CC)C(O)C)CC)C)O)C)ccc(c1O)C</chem>                                | 325                     | No               |
| 613                  | iso-Lasalocid                                                                                                                                                                                 | <chem>CCC(C(=O)C(C(C(CCC1ccc(c(c1C(=O)O)O)C)O)C)C1OC(CC1C)(CC)C1CCC(O1)(CC)CC(O)C</chem>                                       | 325                     | No               |
| 614                  | Isolasalocid A                                                                                                                                                                                | <chem>CC[C@@H](C(=O)[C@H]([C@H]([C@H]([C@H](CCc1ccc(c(c1C(=O)O)O)C)O)C)C1O[C@](C[C@@H]1C)(CC)C1CC[C@@](O1)(CC)[C@H](O)C</chem> | 325                     | No               |
| 615                  | Lasalocid                                                                                                                                                                                     | <chem>CC[C@H](C(=O)[C@H]([C@H]([C@H]([C@H](CCc1ccc(c(c1C(=O)O)O)C)O)C)C1O[C@](C[C@@H]1C)(CC)C1CC[C@]([C@H](O1)C)O)CC</chem>    | 325                     | No               |
| 616                  | Acetamide, N-[15-[2,5'-diethyloctahydro-5'-(1-hydroxyethyl)-4-methyl[2,2'-bifuran]-5-yl]-6,12-dihydroxy-11,13-dimethyl-4,8,14-trioxoheptadecyl]-                                              | <chem>CNCCCC(=O)C(C(C(C(=O)CCC(C(C(C(=O)C(C1OC(CC1C)(CC)C1CCC(O1)(CC)C(O)C)CC)C)O)C)O)C</chem>                                 | 325                     | No               |
| 617                  | Acetamide, N-[15-[5-ethyl-5-(5-ethyltetrahydro-5-hydroxy-6-methyl-2H-pyran-2-yl)tetrahydro-3-methyl-2-furanyl]-6,12-dihydroxy-11,13-dimethyl-4,8,14-trioxoheptadecyl]-                        | <chem>CCC(C1OC(CC1C)(CC)C1CCC(C(O1)C)(O)CC)C(=O)C(C(C(CCC(=O)CC(CC(=O)CCCNC(=O)C)O)C)O)C</chem>                                | 325                     | No               |
| 618                  | Acetamide, N-[15-[5-ethyl-5-(5-ethyltetrahydro-5-hydroxy-6-methyl-2H-pyran-2-yl)tetrahydro-3-methyl-2-furanyl]-6,12-dihydroxy-5,11,13-trimethyl-4,8,14-trioxoheptadecyl]-                     | <chem>CCC(C1OC(CC1C)(CC)C1CCC(C(O1)C)(O)CC)C(=O)C(C(C(CCC(=O)CC(C(C(=O)CCCNC(=O)C)C)O)C)O)C</chem>                             | 325                     | No               |
| 619                  | Acetamide, N-[4-[6-[7-[5-ethyl-5-(5-ethyltetrahydro-5-hydroxy-6-methyl-2H-pyran-2-yl)tetrahydro-3-methyl-2-furanyl]-4-hydroxy-3,5-dimethyl-6-oxononyl]-2-hydroxy-3-methylphenyl]-4-oxobutyl]- | <chem>CCC(C1OC(CC1C)(CC)C1CCC(C(O1)C)(O)CC)C(=O)C(C(C(CCC1ccc(c(c1C(=O)CCCNC(=O)C)O)C)C)O)C</chem>                             | 325                     | Yes              |

| Comp No <sup>a</sup> | Name                                                                                 | SMILES <sup>b</sup>                                                                                                                                           | Cluster No <sup>c</sup> | Rep <sup>d</sup> |
|----------------------|--------------------------------------------------------------------------------------|---------------------------------------------------------------------------------------------------------------------------------------------------------------|-------------------------|------------------|
| 620                  | Ansalactam A                                                                         | <chem>CC(C[C@H]1C(=O)N[C@]23[C@@H]1[C@@H](C)C(=O)/C=C/[C@H](C)/C=C(/C)C=C(C(=O)c1c(C(=O)C2)c(C3=O)cc(c1O)C)/C)C</chem>                                        | 326                     | Yes              |
| 621                  | 10-Deoxymethynolide                                                                  | <chem>CC[C@H]1OC(=O)[C@H](C)[C@@H](O)[C@H](C)C[C@H](C(=O)/C=C/[C@H]1C)C</chem>                                                                                | 327                     | Yes              |
| 622                  | 3-Dehydro-10-deoxymethynolide                                                        | <chem>CC[C@H]1OC(=O)[C@H](C)C(=O)[C@@H](C)C[C@H](C(=O)/C=C/[C@H]1C)C</chem>                                                                                   | 327                     | No               |
| 623                  | Narbonolide                                                                          | <chem>CC[C@H]1OC(=O)[C@H](C)C(=O)[C@H](C)[C@@H](O)[C@H](C[C@H](C(=O)/C=C/[C@H]1C)C)C</chem>                                                                   | 328                     | Yes              |
| 624                  | Dihydronarbonolide                                                                   | <chem>CC[C@H]1OC(=O)[C@H](C)C(=O)[C@H](C)[C@@H](O)[C@H](C[C@H](C[C@H](C@@H)/C=C/[C@H]1C)O)C)C</chem>                                                          | 329                     | Yes              |
| 625                  | 12-Deoxy-12-hydroxy-8-Omethyltetrangomycin                                           | <chem>O=C1C[C@](C)(O)Cc2c1c1c(cc2)C(=O)c2c(C1O)cccc2O</chem>                                                                                                  | 330                     | No               |
| 626                  | 2-[5-Hydroxy-1-(1-hydroxyethyl)-3-methyl-4,9-dioxobenzo[f]isoindol-2-yl]benzoic acid | <chem>CC(c1c2C(=O)c3cccc(c3C(=O)c2c(n1c1cccc1C(=O)O)C)O)O</chem>                                                                                              | 330                     | Yes              |
| 627                  | Bhimamycin H                                                                         | <chem>CC(c1c2C(=O)c3cccc(c3C(=O)c2c(n1c1ccc(cc1)C(=O)O)C)O)O</chem>                                                                                           | 330                     | No               |
| 628                  | Cangumycin C                                                                         | <chem>C[C@@H]1CC(=O)C2=C(C1)CC[C@]13[C@]2(O1)C(=O)c1cccc(c1[C@@H]3O)O</chem>                                                                                  | 331                     | Yes              |
| 629                  | SM 196A                                                                              | <chem>COc1cccc2c1C(O)c1ccc3c(c1C2=O)C(O)CC(C3)(C)O</chem>                                                                                                     | 332                     | Yes              |
| 630                  | CHEMBL556717                                                                         | <chem>N#Cc1ccc(cc1)C(=O)NCC[C@H](c1ccc(cc1)S(=O)(=O)C)c1ccc(cc1)F</chem>                                                                                      | 333                     | Yes              |
| 631                  | Kendomycin                                                                           | <chem>C[C@H]1CCC2OC([C@@H]([C@H]([C@H]2C)O)C)C2=C(O)C(=O)C(=C3C2=C[C@@]([C@H](C[C@@H](C/C(=C1)/C)C)C)(O)O3)C</chem>                                           | 334                     | Yes              |
| 632                  | Makinolide B                                                                         | <chem>COC1/C=C/C(=C(C)/CC(C)C(O)C/C=C(/C=C(/C(=O)OC1C(C(C(=O)/C=C/C(C(C)C)O)C)O)C)\C)C</chem>                                                                 | 335                     | Yes              |
| 633                  | Oxohydrogrolidin                                                                     | <chem>CC[C@H]([C@@H]/C=C/C(=O)[C@H]([C@@H]([C@@H]([C@H]1OC(=O)/C=C/C(=C/[C@@H](C)[C@H]([C@H](C/C(=C/C/[C@@H]1OC)/C)O)/C)/C)O)C)O</chem>                       | 335                     | No               |
| 634                  | PD 118576                                                                            | <chem>COC1/C=C/C(=C(C)/CC(C)C(O)C/C=C(/C=C(C(=O)OC1C(C(C(=O)/C=C/C(C(O)C)C)O)C)/OC)\C)C</chem>                                                                | 336                     | No               |
| 635                  | 23-O-Butyrylbafilomycin D                                                            | <chem>CCCC(=O)O[C@@H]([C@H]/C=C/C(=O)[C@H]([C@@H]([C@@H]([C@H]1OC(=O)/C=C/C(=C/[C@@H](C)[C@H]([C@@H]([C@@H](C/C(=C/C/[C@@H]1OC)/C)O)/C)/OC)C)O)C)C)C</chem>   | 336                     | No               |
| 636                  | 21,22-en-Bafilomycin D                                                               | <chem>CO[C@H]1/C=C/C(=C(C)/C[C@H](C)[C@H](O)[C@@H]/C=C/C(=C(C(=O)O[C@@H]1[C@H]([C@@H]([C@@H]([C@@H](C(=O)C/C=C/[C@@H](C(C)O)\C)O)C)\OC)\C)C</chem>            | 336                     | No               |
| 637                  | Bafilomycin D                                                                        | <chem>CO[C@H]1/C=C/C(=C(C)/C[C@H](C)[C@H](O)[C@@H]/C=C/C(=C(C(=O)OC1[C@H]([C@H]([C@@H](C(=O)/C=C/[C@@H]([C@@H](C(C)O)C)O)C)/OC)\C)C</chem>                    | 336                     | No               |
| 638                  | 21,22-en-9-Hydroxybafilomycin D                                                      | <chem>CO[C@H]1/C=C/C(=C(C)/C[C@H](O)[C@H](C)[C@H](O)[C@@H]/C=C/C(=C(C(=O)O[C@@H]1[C@@H]([C@@H]([C@@H](C(=O)C/C=C/[C@@H](C(C)O)\C)O)C)\OC)\C)C</chem>          | 336                     | No               |
| 639                  | 9-Hydroxybafilomycin D                                                               | <chem>CO[C@H]1/C=C/C(=C(C)/C(O)[C@H](C)[C@@H](O)[C@@H]/C=C/C(=C(C(=O)O[C@@H]1[C@H]([C@@H]([C@@H](C(=O)C=C/[C@@H]([C@@H](C(C)O)C)O)C)/OC)\C)C</chem>           | 336                     | No               |
| 640                  | Concanamycin G                                                                       | <chem>C/C=C(C/C=C/C(=O)[C@H]([C@@H]([C@@H]([C@H]1OC(=O)/C=C(C(=C/[C@@H](C)[C@@H](O)[C@@H]([C@@H]([C@@H](C/C(=C/C/[C@@H]1OC)/C)O)C)O)C)\OC)C)O</chem>          | 336                     | No               |
| 641                  | Bafiomycin A2                                                                        | <chem>CO[C@H]1/C=C/C(=C(C)/C[C@H](C)[C@@H](O)[C@@H]/C=C/C(=C(C(=O)OC1[C@H]([C@H]([C@@H]([C@@H]([C@@H](O)C[C@H](O)[C@H]([C@@H](O1)C(C)C)C)O)C)/OC)\C)C</chem>  | 336                     | No               |
| 642                  | Bafilomycin                                                                          | <chem>CO[C@H]1C=C/C(=C(C)/C[C@H](C)[C@H](O)[C@@H]/C=C/C(=C(C(=O)O[C@@H]1[C@H]([C@@H]([C@@H]([C@@H](O)C[C@H](O)[C@H]([C@@H](O1)C(C)C)C)O)C)\OC)\C)C</chem>     | 336                     | Yes              |
| 643                  | 24-Demethylbafilomycin A2                                                            | <chem>CO[C@H]1/C=C/C(=C(C)/C[C@H](C)[C@H](O)[C@@H]/C=C/C(=C(C(=O)O[C@@H]1[C@H]([C@@H]([C@@H]([C@@H](OC)C[C@H](O)[C@H]([C@@H](O1)CC)C)O)C)\OC)\C)C</chem>      | 336                     | No               |
| 644                  | Bafilomycin A2                                                                       | <chem>COC1/C=C/C(=C(C)/CC(C)C(O)C/C=C(/C=C(/C(=O)OC1C(C(C(C1(OC)CC(O)C(C(O1)C(C)C)C)O)\C)OC)\C)C</chem>                                                       | 336                     | No               |
| 645                  | 21-Deoxybafilomycin A1                                                               | <chem>CO[C@H]1/C=C/C(=C(C)/C[C@H](C)[C@H](O)[C@@H]/C=C/C(=C(C(=O)O[C@@H]1[C@H]([C@@H]([C@@H]([C@@H](O)CC[C@H]([C@H](O1)C(C)C)C)O)C)\OC)\C)C</chem>            | 336                     | No               |
| 646                  | 21-Deoxybafilomycin A2                                                               | <chem>CO[C@H]1/C=C/C(=C(C)/C[C@H](C)[C@H](O)[C@@H]/C=C/C(=C(C(=O)O[C@@H]1[C@H]([C@@H]([C@@H]([C@@H](OC)CC[C@H]([C@H](O1)C(C)C)C)O)C)\OC)\C)C</chem>           | 336                     | No               |
| 647                  | Bafilomycin G                                                                        | <chem>CO[C@H]1/C=C/C(=C(C)/C[C@H](C)[C@H](O)[C@@H]/C=C/C(=C(C(=O)O[C@@H]1[C@H]([C@@H]([C@@H]([C@@H](O)C[C@H](OC)[C@@H]([C@H](O1)C(C)C)C)O)C)\OC)\C)C</chem>   | 336                     | No               |
| 648                  | Bafilomycin A1                                                                       | <chem>CO[C@H]1/C=C/C(=C(C)/C[C@H](C)[C@H](O)[C@@H]/C=C/C(=C(C(=O)OC1[C@H]([C@H]([C@@H]([C@@H](O)C[C@H](O)[C@H]([C@@H](O1)C(C)C)C)O)C)\OC)\C)C</chem>          | 336                     | No               |
| 649                  | Bafiomycin C1                                                                        | <chem>CO[C@H]1/C=C/C(=C(C)/C[C@H](C)[C@@H](O)[C@@H]/C=C/C(=C(C(=O)OC1[C@H]([C@H]([C@@H]([C@@H]([C@@H](OC)C[C@H](O)[C@H]([C@@H](O1)C(C)C)C)O)C)\OC)\C)C</chem> | 336                     | No               |
| 650                  | Bafilomycin L (BFL)                                                                  | <chem>COC1/C=C/C(=C(C)/C[C@H](C)[C@H](O)[C@@H]/C=C/C(=C(C(=O)OC1/C=C/C(C1=CC=C(C(O1)C(C)C)C)C)O)C)\C)C</chem>                                                 | 337                     | Yes              |

| Comp No <sup>a</sup> | Name                                                                                                  | SMILES <sup>b</sup>                                                                                                                                                                 | Cluster No <sup>c</sup> | Rep <sup>d</sup> |
|----------------------|-------------------------------------------------------------------------------------------------------|-------------------------------------------------------------------------------------------------------------------------------------------------------------------------------------|-------------------------|------------------|
| 651                  | 24-Demethylbaflomycin Z                                                                               | <chem>CO[C@H]1/C=C/C=C/C(C)/C[C@H](C)[C@H](O)[C@@H](/C=C/C=C/C(=O)O[C@@H]1[C@H](/C=C/C1=CC=C([C@H](O1)CC(C)C)OC)C</chem>                                                            | 338                     | Yes              |
| 652                  | Benthocyanin C                                                                                        | <chem>N#C/C=C/c1cc2n(C/C=C/C(C)C)C)c3cccc3[nH]c2c(c1=O)C(=O)O/c1cccc1</chem>                                                                                                        | 339                     | Yes              |
| 653                  | Sespenine                                                                                             | <chem>O=C1CC2[C@@]3(C)CC[C@@H]([C@@]([C@@H]3CC[C@@]32C[C@H]1Nc1c3cccc1)(C)C(=O)O)O</chem>                                                                                           | 340                     | No               |
| 654                  | Indosespene                                                                                           | <chem>C=C1CC[C@H]2[C@]([C@H]1Cc1c[nH]c3c1cccc3)(C)CC[C@H]([C@@]2(C)C(=O)O)O</chem>                                                                                                  | 340                     | Yes              |
| 655                  | Indosепенol                                                                                           | <chem>OC[C@]1(C)[C@@H](O)CC[C@]2([C@H]1CCC(=C)[C@@H]2Cc1c[nH]c2c1cccc2)C</chem>                                                                                                     | 340                     | No               |
| 656                  | Prexiamycin                                                                                           | <chem>O[C@H]1CC[C@]2([C@H]([C@]1(C)C(=O)O)CCC1=C2Cc2c(C1)[nH]c1c2cccc1)C</chem>                                                                                                     | 340                     | No               |
| 657                  | Salinazinone B                                                                                        | <chem>CC(=Cc1nc(cc(=O)o1)N1[C@@H](C)CCC1=O)C</chem>                                                                                                                                 | 341                     | Yes              |
| 658                  | Mycemycin B                                                                                           | <chem>COC(=O)c1cccc2c1NC(=O)c1c(O2)ccc(c1)Cl</chem>                                                                                                                                 | 342                     | Yes              |
| 659                  | Mycemycin A                                                                                           | <chem>COC(=O)c1cccc2c1NC(=O)c1c(O2)cccc1</chem>                                                                                                                                     | 342                     | No               |
| 660                  | Mycemycin H                                                                                           | <chem>O=C1Nc2c(cc(c(c2Oc2c1cccc2)C)Cl)C(=O)C</chem>                                                                                                                                 | 343                     | Yes              |
| 661                  | Mycemycin D                                                                                           | <chem>O=C1Nc2c(cc(c(c2Oc2c1cccc2)C)Cl)C(=O)N</chem>                                                                                                                                 | 343                     | No               |
| 662                  | Mycemycin E                                                                                           | <chem>Clc1ccc2c(c1)C(=O)Nc1c(O2)c(C)c(cc1C(=O)N)Cl</chem>                                                                                                                           | 344                     | Yes              |
| 663                  | Mycemycin F                                                                                           | <chem>O=Cc1cc(Cl)c(c2c1NC(=O)c1c(O2)ccc(c1)Cl)C</chem>                                                                                                                              | 344                     | No               |
| 664                  | Mycemycin C                                                                                           | <chem>COC(=O)c1cc(Cl)c(c2c1NC(=O)c1c(O2)ccc(c1)Cl)C</chem>                                                                                                                          | 344                     | No               |
| 665                  | 19-Methoxyxiamycin                                                                                    | <chem>COC1C[C@H]2[C@](C)(C(=O)O)[C@@H](O)CC[C@@]2(c2c1cc1[nH]c3c(c1c2)cccc3)C</chem>                                                                                                | 345                     | No               |
| 666                  | 19-Carbonylxiamycin                                                                                   | <chem>O[C@H]1CC[C@]2([C@H]([C@]1(C)C(=O)O)CC(=O)c1c2cc2c(c1)[nH]c1c2cccc1)C</chem>                                                                                                  | 345                     | No               |
| 667                  | Xiamycin C                                                                                            | <chem>O[C@H]1CC[C@]2([C@H]([C@]1(C)C(=O)O)C[C@@H](c1c2cc2c(c1)[nH]c1c2cccc1)O)C</chem>                                                                                              | 345                     | No               |
| 668                  | Xiamycin A                                                                                            | <chem>O[C@H]1CC[C@]2([C@H]([C@]1(C)C(=O)O)CCc1c2cc2c(c1)[nH]c1c2cccc1)C</chem>                                                                                                      | 345                     | No               |
| 669                  | Oridamycin A                                                                                          | <chem>O[C@H]1CC[C@]2(C([C@@]1(C)C(=O)O)CCc1c2cc2c(c1)[nH]c1c2cccc1)C</chem>                                                                                                         | 345                     | No               |
| 670                  | Chloroxiamycin                                                                                        | <chem>O[C@H]1CC[C@]2([C@H]([C@]1(C)C(=O)O)CCc1c2cc2c(c1Cl)[nH]c1c2cccc1)C</chem>                                                                                                    | 345                     | Yes              |
| 671                  | Xiamycin E                                                                                            | <chem>COC(=O)[C@]1(C)[C@@H](O)CC[C@]2([C@H]1CC(=O)c1c2cc2c(c1)[nH]c1c2cccc1)C</chem>                                                                                                | 345                     | No               |
| 672                  | Xiamycin D                                                                                            | <chem>COC(=O)[C@]1(C)[C@@H](O)CC[C@]2([C@H]1C[C@H](O)c1c2cc2c(c1)[nH]c1c2cccc1)C</chem>                                                                                             | 345                     | No               |
| 673                  | Oxiamycin                                                                                             | <chem>OC(=O)[C@]1(C)[C@@H](O)CC[C@]2([C@H]1CCc1c(O2)cc2c(c1)[nH]c1c2cccc1)C</chem>                                                                                                  | 345                     | No               |
| 674                  | Flazin, methyl ester                                                                                  | <chem>OCc1ccc(o1)c1nc(cc2c1[nH]c1c2cccc1)C(=O)OC</chem>                                                                                                                             | 346                     | Yes              |
| 675                  | Perlolyrine                                                                                           | <chem>OCc1ccc(o1)c1nccc2c1[nH]c1c2cccc1</chem>                                                                                                                                      | 346                     | No               |
| 676                  | (3R)-3,7-Dihydroxy-8-[2-(hydroxymethyl)-3-methoxybenzoyl]-3-methyl-1,2,3,4-tetrahydronaphthalen-1-one | <chem>COc1cccc(c1CO)C(=O)c1c(O)ccc2c1C(=O)C[C@](C2)(C)O</chem>                                                                                                                      | 347                     | No               |
| 677                  | Elmenol C                                                                                             | <chem>CO[C@H]1O[C@H](c2c1c(OC)ccc2)c1c(O)ccc2c1C(=O)CC(C2)(C)O</chem>                                                                                                               | 347                     | No               |
| 678                  | Elmenol D                                                                                             | <chem>CO[C@@H]1O[C@H](c2c1c(OC)ccc2)c1c(O)ccc2c1C(=O)CC(C2)(C)O</chem>                                                                                                              | 347                     | Yes              |
| 679                  | Cangumycin F                                                                                          | <chem>OCc1c(O)cccc1C(=O)c1c(O)c(O)cc2c1C(=O)C[C@H](C2)C</chem>                                                                                                                      | 348                     | Yes              |
| 680                  | Cangumycin E                                                                                          | <chem>OCc1c(O)cccc1C(=O)c1c(O)ccc2c1C(=O)C[C@H](C2)C</chem>                                                                                                                         | 348                     | No               |
| 681                  | Tirandamycin C                                                                                        | <chem>C/C=C/C[C@H]([C@H]1O[C@@]2(C)O[C@@H]([C@@H]1C)CC=C2C)/C=C/C=C1/C(=O)CNC1=O/O</chem>                                                                                           | 349                     | No               |
| 682                  | Tirandamycin A                                                                                        | <chem>C/C=C/C[C@H]([C@H]1O[C@@]2(C)O[C@@H]([C@@H]1C)C(=O)[C@H]1[C@]2(C)O1)C)/C=C/C=C1/C(=O)CNC1=O/O</chem>                                                                          | 349                     | No               |
| 683                  | Tirandamycin L                                                                                        | <chem>C/C=C/C[C@H]([C@H]1O[C@]2(C)O[C@H]([C@@H]1C)C(=O)C[C@H]2C)/C=C/C=C1/C(=O)CNC1=O/O</chem>                                                                                      | 349                     | Yes              |
| 684                  | octa-Valinomycin                                                                                      | <chem>CC1OC(=O)C(NC(=O)C(OC(=O)C(NC(=O)C(OC(=O)C(NC(=O)C(OC(=O)C(NC1=O)C(C)C)C(C)C)C(C)C)C(C)C)C(C)C</chem>                                                                         | 350                     | Yes              |
| 685                  | Valinomycin                                                                                           | <chem>C[C@H]1OC(=O)[C@H](NC(=O)[C@H](OC(=O)[C@@H](NC(=O)[C@H](C)OC(=O)[C@H](NC(=O)[C@H](OC(=O)[C@@H](NC(=O)[C@H](OC(=O)[C@H](NC1=O)C(C)C)C(C)C)C(C)C)C(C)C)C(C)C)C(C)C)C(C)C</chem> | 351                     | Yes              |
| 686                  | Carbazomycin G                                                                                        | <chem>COC1=C(C)C(c2c(C1=O)c1cccc1[nH]2)(C)O</chem>                                                                                                                                  | 352                     | Yes              |

| Comp No <sup>a</sup> | Name                                                                                                  | SMILES <sup>b</sup>                                                                                                                                      | Cluster No <sup>c</sup> | Rep <sup>d</sup> |
|----------------------|-------------------------------------------------------------------------------------------------------|----------------------------------------------------------------------------------------------------------------------------------------------------------|-------------------------|------------------|
| 687                  | Carbazomycin H                                                                                        | <chem>COc1ccc2c(c1)c1C(=O)C(=C(C(c1[nH]2)(C)O)C)OC</chem>                                                                                                | 352                     | No               |
| 688                  | Ansaseomycin A                                                                                        | <chem>CC(C/C1=C/[C@@H]2C=C[C@H]3[C@]4([C@@H]2C(=O)c2c(C(=O)[C@@H](C=C[C@H]([C@@H](C1=O)C)O)C)c(O)c(c(c2C4=O)O)C)NC(=O)C3)C</chem>                        | 353                     | Yes              |
| 689                  | Ansaseomycin B                                                                                        | <chem>CC(C/C1=C/[C@@H]2C=C[C@H]3[C@]4([C@@H]2C(=O)c2c(C(=O)/C(=C/C[C@H]([C@@H](C1=O)C)O)C)c(O)c(c(c2C4=O)O)C)NC(=O)C3)C</chem>                           | 353                     | No               |
| 690                  | Mohangic acid E                                                                                       | <chem>OC[C@H]1O[C@@H](Nc2ccc(cc2)C(=O)C[C@H]([C@@H](C[C@H]([C@@H]([C@@H]([C@@H]([C=C/C=C/C=C/C/[C@@H](CC(=O)O)O)C)O)C)O)[C@H]([C@@H]([C@@H]1O)O)O</chem> | 354                     | Yes              |
| 691                  | Hydrazidomycin D                                                                                      | <chem>CCCCC/C=C\CCCCCCCCC(=O)N(NC(=O)C)CCCCC</chem>                                                                                                      | 355                     | Yes              |
| 692                  | Elaiomycin B                                                                                          | <chem>CCCCCCCC/C=C/C/C/C/C=C\N(C(=O)CCCCCCCC)NC(=O)COC</chem>                                                                                            | 356                     | No               |
| 693                  | Hydrazidomycin A                                                                                      | <chem>CCCCCCCCCCCC/C=C\N(C(=O)CCCCCCCC)NC(=O)COC</chem>                                                                                                  | 356                     | No               |
| 694                  | Elaiomycin C                                                                                          | <chem>CCCCCCCCCCCC(=O)N(NC(=O)COC)/C=C\CCCC/C=C/C/C=C/C/C/C/C</chem>                                                                                     | 356                     | Yes              |
| 695                  | CP 78545                                                                                              | <chem>C=CCC/C=C/C(C(C(C(C(C(C1OC(CCC1C)C(C(=O)O)C)O)C)O)C)O)C)O)C)C</chem>                                                                               | 357                     | Yes              |
| 696                  | Nahuoic acid B                                                                                        | <chem>O[C@@H](C[C@@H]([C@H]([C@@H](C(C)O)C)O)C/C=C/[C@H]1C=C[C@@]2([C@H]([C@@H]1/C=C/C(/C(=O)O)C)[C@H](C)[C@H]([C@H](C2)O)O)C)C</chem>                   | 358                     | No               |
| 697                  | Nahuoic acid A                                                                                        | <chem>O[C@H](C[C@H]([C@H]([C@@H](C(C)O)C)O)C/C=C/[C@@H]1C=C[C@]2([C@@H]([C@H]1/C=C(/C(=O)O)C)[C@H](C)[C@@H]([C@H]2O)O)C)C</chem>                         | 358                     | No               |
| 698                  | Nahuoic acid C                                                                                        | <chem>O[C@@H](C[C@@H]([C@H]([C@@H](C(C)O)C)O)C/C=C/[C@H]1C=C[C@@]2([C@H]([C@@H]1/C=C(/C(=O)O)C)[C@H](C)[C@H]([C@H]([C@@H]2O)O)O)C)C</chem>               | 358                     | No               |
| 699                  | Nahuoic acid D                                                                                        | <chem>O[C@@H](C[C@@H]([C@H]([C@@H](C(C)O)C)O)O)C/C=C/[C@H]1C=C[C@@]2([C@H]([C@@H]1/C=C(/C(=O)O)C)[C@H](C)[C@H]([C@H](C2)O)O)C)C</chem>                   | 358                     | No               |
| 700                  | Nahuoic acid E                                                                                        | <chem>O[C@@H](C[C@@H]([C@H]([C@@H](C(C)O)C)O)O)C/C=C/[C@H]1C=C[C@@]2([C@H]([C@@H]1/C=C(/C(=O)O)C)[C@H](C)[C@H]([C@H]2O)O)C)C</chem>                      | 358                     | Yes              |
| 701                  | Derivative                                                                                            | <chem>CCN(c1ccc2c(c1)oc(=O)c(c2)c1nnc(s1)c1cccc1)CC</chem>                                                                                               | 359                     | Yes              |
| 702                  | Antarlide B                                                                                           | <chem>C[C@H]1/C=C/C=C(C\C)/[C@H](O)C/C=C/C=C/C=C/C(/C(=O)O[C@@H](C[C@H](CC1O)[C@H]([C@H](c1cccc(c1)O)O)C)C</chem>                                        | 360                     | No               |
| 703                  | Antarlide A                                                                                           | <chem>C[C@H]1/C=C/C=C(C\C)/[C@H](O)C/C=C/C=C/C=C/C(/C(=O)O[C@@H](C[C@H](CC1O)[C@H]([C@H](c1cccc(c1)O)O)C)C</chem>                                        | 360                     | No               |
| 704                  | Antarlide G                                                                                           | <chem>C[C@H]1/C=C/C=C(C\C)/[C@H](O)C/C=C/C=C/C=C/C\C(=O)OC(CC1)CC([C@@H]([C@H](c1cccc(c1)O)O)C)C</chem>                                                  | 360                     | No               |
| 705                  | Antarlide H                                                                                           | <chem>C[C@H]1/C=C/C=C(C\C)/[C@H](O)C/C=C/C=C/C=C/C\C(=O)OC(CC1)CC([C@@H]([C@H](c1cccc(c1)O)O)C)C</chem>                                                  | 360                     | Yes              |
| 706                  | Antarlide E                                                                                           | <chem>C[C@H]1/C=C/C=C(C\C)/[C@H](O)C/C=C/C=C/C=C/C\C(=O)O[C@@H](C[C@H](CC1O)[C@H]([C@H](c1cccc(c1)O)O)C)C</chem>                                         | 361                     | Yes              |
| 707                  | Antarlide D                                                                                           | <chem>C[C@H]1/C=C/C=C(C\C)/[C@H](O)C/C=C/C=C/C=C/C\C(=O)O[C@@H](C[C@H](CC1O)[C@H]([C@H](c1cccc(c1)O)O)C)C</chem>                                         | 361                     | No               |
| 708                  | Antarlide F                                                                                           | <chem>C[C@H]1/C=C/C=C(C\C)/[C@H](O)C/C=C/C=C/C=C/C\C(=O)O[C@@H](C[C@H](CC1O)[C@H]([C@H]([C@H](c1cccc(c1)O)O)C)C</chem>                                   | 361                     | No               |
| 709                  | Antarlide C                                                                                           | <chem>C[C@H]1/C=C/C=C(C\C)/[C@H](O)C/C=C/C=C/C=C/C(/C(=O)O[C@@H](C[C@H](CC1O)[C@H]([C@H](c1cccc(c1)O)O)C)C</chem>                                        | 361                     | No               |
| 710                  | Methylsulochrin                                                                                       | <chem>COc1cc(OC)c(c(c1)C(=O)OC)C(=O)c1c(O)cc(cc1O)C</chem>                                                                                               | 362                     | Yes              |
| 711                  | Metatricycloene                                                                                       | <chem>NC(=O)C=C/C=C/C1C=CC2C3C1C(/C=C/C=C/C=C/C(=O)O)OC3C=C2</chem>                                                                                      | 363                     | Yes              |
| 712                  | Alpiniamide C                                                                                         | <chem>C[C@@H](C(=O)NCC(=O)C(=C/C(C(=O)O)C)C)[C@H]([C(=C/CC)/C)O</chem>                                                                                   | 364                     | Yes              |
| 713                  | L-Isoleucine, N-[[[(1S,3aS,6R,7aS)-6-ethyl-2,3,3a,6,7,7a-hexahydro-1-hydroxy-1H-inden-4-yl]carbonyl]- | <chem>CC[C@@H]([C@@H](C(=O)O)NC(=O)C1=C[C@H](CC)C[C@H]2[C@@H]1CC[C@@H]2O)C</chem>                                                                        | 365                     | Yes              |
| 714                  | L-Isoleucine, N-[[[(1R,3aS,6R,7aS)-6-ethyl-2,3,3a,6,7,7a-hexahydro-1-hydroxy-1H-inden-4-yl]carbonyl]- | <chem>CC[C@@H]([C@@H](C(=O)O)NC(=O)C1=C[C@H](CC)C[C@H]2[C@@H]1CC[C@H]2O)C</chem>                                                                         | 365                     | No               |
| 715                  | Coronatine                                                                                            | <chem>CC[C@H]1C=C(C(=O)N[C@]2(C[C@@H]2CC)C(=O)O)[C@@H]2[C@H](C1)C(=O)CC2</chem>                                                                          | 365                     | No               |
| 716                  | 3-[(2E,8E,10E,16E,18E)-14-Ethyl-7,13-dihydroxy-2,16,18-                                               | <chem>CCC(C(C/C=C/C/C/C(CCC/C=C(/C(=O)C1=C(O)C(NC1=O)CO)C)O)O)C/C(=C/C(=C/C)/C</chem>                                                                    | 366                     | Yes              |



| Comp No <sup>a</sup> | Name                                                                                                                                                    | SMILES <sup>b</sup>                                                                    | Cluster No <sup>c</sup> | Rep <sup>d</sup> |
|----------------------|---------------------------------------------------------------------------------------------------------------------------------------------------------|----------------------------------------------------------------------------------------|-------------------------|------------------|
|                      | trimethylcosa-2,8,10,16,18-pentaenyl]-4-hydroxy-5-(hydroxymethyl)-2,5-dihydro-1H-pyrrol-2-one                                                           |                                                                                        |                         |                  |
| 717                  | {4-[(2E,8E,10E,16E,18E)-14-Ethyl-7,13-dihydroxy-2,16,18-trimethylcosa-2,8,10,16,18-pentaenyl]-3-hydroxy-5-oxo-2,5-dihydro-1H-pyrrol-2-yl)methyl acetate | CCC(C(C/C=C/C=C/C/C(CCC/C=C/C(=O)C1=C(O)C(NC1=O)COC(=O)C)\C)O)C/C(=C/C=C(C)/C)/C       | 366                     | No               |
| 718                  | 3-[(2Z,7S,8E,10E,13R,14R,16E,18E)-14-Ethyl-7,13-dihydroxy-2,16,18-trimethylcosa-2,8,10,16,18-pentaenyl]-4-hydroxy-5-methylidenepyrrolidin-2-one         | CC[C@@H]([C@@H](C/C=C/C=C/[C@H](CCC/C=C/C(=O)C1C(=O)NC(=C)C1O)/C)O)C/C(=C/C(=C/C)/C)/C | 366                     | No               |
| 719                  | MX-1                                                                                                                                                    | O=Cc1cc(O)c2c(c1C(=O)O)OC1(C2)C(C)CCC2C1(C)CC(O)C(C2(C)C)O                             | 367                     | Yes              |
| 720                  | SF2768 analogue 2                                                                                                                                       | CC(CC(=O)NCC1CCC(C(O)O)NC(=O)CC(C)C)C                                                  | 368                     | Yes              |
| 721                  | Actinoquinoline A                                                                                                                                       | OC[C@@H](NC(=O)c1nc2ccccc2cc1O)CC[C@H](CNC(=O)CC(C)C)O                                 | 369                     | Yes              |
| 722                  | Actinoquinoline B                                                                                                                                       | CC(CC(=O)NC[C@H]1CC[C@@H]([C@@H](O)O)NC(=O)c1nc2ccccc2cc1O)C                           | 369                     | No               |
| 723                  | Chimonanthine                                                                                                                                           | CN1CC[C@@]2([C@H]1Nc1c2cccc1)[C@@]12CCN([C@@H]1Nc1c2cccc1)C                            | 370                     | Yes              |
| 724                  | Furaquinocin J                                                                                                                                          | COC1=C(C)C(=O)c2c(C1=O)cc(c1c2O[C@@H]([C@]1(C)[C@@H](C/C=C/C(=O)N)\C)O)C)O             | 371                     | No               |
| 725                  | Furaquinocin I                                                                                                                                          | COC1=C(C)C(=O)c2c(C1=O)cc(c1c2O[C@@H]([C@]1(C)[C@@H](C/C=C/C(=O)O)\C)O)C)O             | 371                     | No               |
| 726                  | Fumaquinone                                                                                                                                             | COC1=C(C)C(=O)c2c(C1=O)cc(c(c2O)CC=C(C)C)O                                             | 371                     | No               |
| 727                  | Furaquinocin E                                                                                                                                          | OC/C(=C/C=C/C1(C)C(C)Oc2c1c(O)cc1c2C(=O)C(=C(C1=O)OC)C)/C                              | 371                     | No               |
| 728                  | Furaquinocin G                                                                                                                                          | COC1=C(C)C(=O)c2c(C1=O)cc(c1c2OC(C1(C)C1CC=C(C(O)O)C)C)O                               | 371                     | No               |
| 729                  | Furaquinocin C                                                                                                                                          | COC1=C(C)C(=O)c2c(C1=O)cc(c1c2OC(C1(C)CCC=C(C)C)C)O                                    | 371                     | No               |
| 730                  | NSC647943                                                                                                                                               | COC1=C(C)C(=O)c2c(C1=O)cc1c(c2O)C(C(O)C)(C)CCC=C(C)C                                   | 371                     | No               |
| 731                  | Furaquinocin H                                                                                                                                          | OCC(=CCC(C1(C)C(C)Oc2c1c(O)cc1c2C(=O)C(=C(C1=O)OC)C)O)CO                               | 371                     | No               |
| 732                  | Furaquinocin F                                                                                                                                          | OC/C(=C/CCC1(C)C(C)Oc2c1c(O)cc1c2C(=O)C(=C(C1=O)OC)C)/C                                | 371                     | No               |
| 733                  | Furaquinocin A                                                                                                                                          | OC/C(=C/CC(C1(C)C(C)Oc2c1c(O)cc1c2C(=O)C(=C(C1=O)OC)C)O)/C                             | 371                     | No               |
| 734                  | Furaquinocin D                                                                                                                                          | COC1=C(C)C(=O)c2c(C1=O)cc(c1c2O[C@@H]([C@]1(C)[C@@H](CC=C(C)C)O)C)O                    | 371                     | Yes              |
| 735                  | CHEMBL3092696                                                                                                                                           | COC1=CC(=O)c2c(C1=O)cc(c1c2O[C@@H]([C@]1(C)CCC1C(=C)CCCC1(C)C)C)O                      | 371                     | No               |
| 736                  | CHEMBL3092699                                                                                                                                           | OC[C@H]1Oc2c([C@@]1(C)CCC1C(=C)CCCC1(C)C)c(O)cc1c2C(=O)C(=C(C1=O)OC                    | 371                     | No               |
| 737                  | CHEMBL3092698                                                                                                                                           | OC[C@H]1Oc2c([C@]1(C)CCC1C(=C)CCCC1(C)C)c(O)cc1c2C(=O)C(=C(C1=O)OC                     | 371                     | No               |
| 738                  | CHEMBL3092697                                                                                                                                           | COC1=CC(=O)c2c(C1=O)cc(c1c2O[C@@H]([C@]1(C)CCC1C(=C)CCCC1(C)C)C)O                      | 371                     | No               |
| 739                  | JBIR-136                                                                                                                                                | CO[C@@H]1CC(=O)c2c([C@H]1O)cc(c1c2O[C@@H]([C@]1(C)[C@@H](CC=C(C)C)O)C)O                | 372                     | Yes              |
| 740                  | Actinonin                                                                                                                                               | CCCC[C@@H](C(=O)N[C@H](C(=O)N1CCC[C@H]1CO)C(C)C)CC(=O)NO                               | 373                     | Yes              |
| 741                  | LL-Z 1272d                                                                                                                                              | O=Cc1c(O)c(C/C=C/C(=C/C[C@@]2(C)[C@H](C)CCC(=O)[C@@H]2C)\C)c(c1C)Cl)O                  | 374                     | Yes              |
| 742                  | Ascochlorin                                                                                                                                             | O=Cc1c(O)c(C/C=C/C(=C/C[C@@]2(C)[C@H](C)CCC(=O)[C@@H]2C)\C)c(c1C)Cl)O                  | 374                     | No               |

| Comp No <sup>a</sup> | Name                                                             | SMILES <sup>b</sup>                                                                                                                                                                                                            | Cluster No <sup>c</sup> | Rep <sup>d</sup> |
|----------------------|------------------------------------------------------------------|--------------------------------------------------------------------------------------------------------------------------------------------------------------------------------------------------------------------------------|-------------------------|------------------|
| 743                  | Pyrroindomycin A                                                 | <chem>CCC1CC2(C)C=C(C(=O)O)C(C3(C2)NC(=O)C(=C(C2(C(C1O)C=CC1C2CCCC1O)[C@@H]1CC[C@@H]([C@@H](O1)C)O[C@@H]1O[C@H](C)[C@H]([C@@H](C1)(C)O)O[C@@H]1O[C@H](C)[C@@H]([C@@H](C1)OC(=O)c1[nH]c2c(c1)c1c([nH]2)cccc1N)C)O)C3=O)C</chem> | 375                     | Yes              |
| 744                  | Pyrroindomycin B                                                 | <chem>CCC1CC2(C)C=C(C(=O)O)C(C3(C2)NC(=O)C(=C3O)C(=O)C2(C(C1O)C=CC1C2CCCC1OC1OCC(C(C1)OC1OC(C)C(C(C1)(C)O)OC1CC(OC(=O)c2[nH]c3c(c2)c2c([nH]3)ccc(c2)Cl)C(C(O1)C)N)C)C</chem>                                                   | 376                     | Yes              |
| 745                  | 2-(3-Acetoxy-4,4,14-trimethylandrosta-8-en-17-yl)-propanoic acid | <chem>CC(=O)OC1CC[C@]2(C(C1(C)C)CCC1=C2CC[C@]2([C@@]1(C)CCC2C(C(=O)O)C)C)C</chem>                                                                                                                                              | 377                     | Yes              |
| 746                  | Oxaloterpin E                                                    | <chem>C=C[C@@]1(C)CC=C2[C@H](C1)CC[C@H]1[C@@]2(C)CC[C@H](C1(C)C)OC(=O)N</chem>                                                                                                                                                 | 378                     | Yes              |
| 747                  | Oxaloterpin D                                                    | <chem>C=C[C@@]1(C)CC=C2[C@H](C1)CC[C@H]1[C@@]2(C)CC[C@H](C1(C)C)OC(=O)C(=O)N</chem>                                                                                                                                            | 379                     | Yes              |
| 748                  | Oxaloterpin C                                                    | <chem>ONC(=O)C(=O)O[C@@H]1CC[C@]2([C@@H](C1(C)C)CC[C@@H]1C2=CC[C@](C1)(C)C=C)C</chem>                                                                                                                                          | 379                     | No               |
| 749                  | Niizalactam C                                                    | <chem>C[C@H]1/C=C/C=C/C=C(C)/[C@H]2C=C[C@@H]3[C@H]([C@@H]2/C=C/C=C/C(=O)CC(=O)N(C1)C)/C[C@@H](O)[C@@H]([C@@H](C3=O)O)O</chem>                                                                                                  | 380                     | Yes              |
| 750                  | Tetronasin                                                       | <chem>CO[C@H]([C@H]1C[C@@H]([C@@H](O1)[C@H]/C=C/[C@@H]1CC[C@H]([C@@H](O1)/C=C/[C@@H]1CCC[C@H]([C@@H]1[C@@H]([C@H]/C=C/1\C(=O)OCC1=O)/O)C)C)/CO)C)C)C</chem>                                                                    | 381                     | No               |
| 751                  | Tetronomycin                                                     | <chem>CO[C@H]([C@@H]1CC[C@H]([C@@H](O1)C/C=C/[C@H]1CC[C@H](C(O1)/C=C/[C@@H]1CCC[C@@H](C1C(C(=O)C1=C(O)C(=C)OC1=O)C)C)/CO)C)C</chem>                                                                                            | 381                     | No               |
| 752                  | Tetronasin sodium                                                | <chem>CO[C@H]([C@H]1C[C@@H]([C@@H](O1)[C@H]/C=C/1CC[C@H]([C@@H](O1)/C=C/[C@H]1CC[C@H]([C@@H]1[C@@H](C(=O)C1=C([O-])COC1=O)C)C)/CO)C)C)C.[Na+]</chem>                                                                           | 381                     | Yes              |
| 753                  | Lankamycin                                                       | <chem>CO[C@H]1C[C@@H](C)O[C@H]([C@@H]1O)O[C@H]1[C@@H](C)C[C@](C)(O)C(=O)[C@H](C)[C@@H](OC(=O)C)[C@H]([C@@H](OC(=O)C)[C@@H]([C@@H]1C)O[C@@H]1O[C@H](C)[C@@H]([C@](C1)(C)OC)OC(=O)C)C)[C@H]([C@@H](O)C)C</chem>                  | 382                     | No               |
| 754                  | Lankavamycin                                                     | <chem>COC1CC(C)OC(C1O)O[C@H]1[C@@H](C)C[C@](C)(O)C(=O)[C@H](C)[C@@H](OC(=O)C)[C@H]([C@H](OC(=O)C)[C@@H]([C@@H]1C)OC1OC(C)C(C(C1)(C)OC)OC(=O)C)C(C(O)C)C)C</chem>                                                               | 382                     | Yes              |
| 755                  | 15-Deoxylankamycin                                               | <chem>COC1CC(C)OC(C1O)O[C@H]1[C@@H](C)C[C@](C)(O)C(=O)[C@H](C)[C@@H](OC(=O)C)[C@H]([C@H](OC(=O)C)[C@@H]([C@@H]1C)OC1OC(C)C(C(C1)(C)OC)OC(=O)C)C)[C@H](CC)C</chem>                                                              | 382                     | No               |
| 756                  | Kujimycin A                                                      | <chem>COC1CC(C)OC(C1O)OC1C(C)CC(C)(O)C(=O)C(C)C(OC(=O)C)C(C(OC(=O)C)C(C1C)OC1OC(C)C(C(C1)(C)OC)O)C)C(C(O)C)C)C</chem>                                                                                                          | 382                     | No               |
| 757                  | 8,15-Dideoxylankamycin                                           | <chem>COC1CC(C)OC(C1O)O[C@H]1[C@@H](C)C[C@H](C)C(=O)[C@H](C)[C@@H](OC(=O)C)[C@H]([C@H](OC(=O)C)[C@@H]([C@@H]1C)OC1OC(C)C(C(C1)(C)OC)OC(=O)C)C)[C@H](CC)C)C</chem>                                                              | 382                     | No               |
| 758                  | 8-Deoxylankamycin                                                | <chem>CO[C@H]1C[C@@H](C)O[C@H]([C@@H]1O)O[C@H]1[C@@H](C)C[C@H](C)C(=O)[C@H](C)[C@@H](OC(=O)C)[C@H](C)OC(=O)C)[C@H]([C@@H]([C@@H]1C)O[C@@H]1O[C@H](C)[C@@H]([C@](C1)(C)OC)OC(=O)C)C)[C@H]([C@@H](O)C)C</chem>                   | 382                     | No               |
| 759                  | Ebelactone B                                                     | <chem>CC[C@H]([C@H]([C@@H](C(=O)[C@H]/C=C/[C@@H](C1OC(=O)[C@H]1CC)C)C)C)O)C</chem>                                                                                                                                             | 383                     | Yes              |
| 760                  | Ebelactone A                                                     | <chem>CCC(C(C(C(=O)C)/C=C/C(C1OC(=O)C1C)C)C)C)O)C</chem>                                                                                                                                                                       | 383                     | No               |
| 761                  | 6-Deoxyerythronolide A                                           | <chem>CCC1OC(=O)C(C)C(O)C(C)C(C)C(C(C(=O)C(C(C1(C)O)O)C)C)C</chem>                                                                                                                                                             | 384                     | Yes              |
| 762                  | 6-Deoxyerythronolide B                                           | <chem>CC[C@H]1OC(=O)[C@H](C)[C@@H](O)[C@H](C)[C@@H](O)[C@H](C)[C@H](C(=O)[C@@H]([C@@H]([C@H]1C)O)C)C</chem>                                                                                                                    | 385                     | Yes              |
| 763                  | SCHEMBL14000791                                                  | <chem>CCC[C@H]1OC(=O)[C@H](C)[C@@H](O)[C@H](C)[C@@H](O)[C@H](C)[C@H](C(=O)[C@@H]([C@@H]([C@H]1C)O)C)C</chem>                                                                                                                   | 385                     | No               |
| 764                  | Nisamycin                                                        | <chem>OC(=O)/C=C/C=C/C=C/[C@@]1(O)C=C(NC(=O)/C=C/C=C/C2CCCC2)C(=O)[C@H]2[C@@H]1O2</chem>                                                                                                                                       | 386                     | Yes              |
| 765                  | 4-Hydroxyprotoasukamycin                                         | <chem>C/C=C/C=C/C=C/C(=O)NC1=C[C@@](O)/(C=C/C=C/C=C/C(=O)NC2=C(O)CCC2=O)C2C(C1=O)O2</chem>                                                                                                                                     | 387                     | No               |
| 766                  | Alisamycin                                                       | <chem>O=C(NC1=CC(O)/(C=C/C=C/C=C/C(=O)NC2=C(O)CCC2=O)C2C(C1=O)O2)/C=C/C=C/C1CCCC1</chem>                                                                                                                                       | 387                     | No               |
| 767                  | Asukamycin I                                                     | <chem>CCCC/C=C/C=C/C=C/C(=O)NC1=CC(O)/(C=C/C=C/C=C/C(=O)NC2=C(O)CCC2=O)C2C(C1=O)O2</chem>                                                                                                                                      | 387                     | No               |
| 768                  | Manumycin B                                                      | <chem>CCCC[C@H]/C=C/C(=O)NC1=C[C@@](O)/(C=C/C=C/C=C/C(=O)NC2=C(O)CCC2=O)[C@H]2[C@@H](C1=O)O2)C)C</chem>                                                                                                                        | 387                     | No               |
| 769                  | Manumycin A, Streptomyces Parvulus                               | <chem>CCCC[C@H]/C=C/C(=O)NC1=C[C@@](O)/(C=C/C=C/C=C/C(=O)NC2=C(O)CCC2=O)[C@H]2C(C1=O)O2)C)C</chem>                                                                                                                             | 387                     | No               |
| 770                  | Manumycin E                                                      | <chem>CC(CC/C=C/C=C/C=C/C(=O)NC1=CC(O)/(C=C/C=C/C=C/C(=O)NC2=C(O)CCC2=O)C2C(C1=O)O2)C</chem>                                                                                                                                   | 387                     | No               |
| 771                  | Manumycin                                                        | <chem>CCCC[C@H]/C=C/C(=O)NC1=C[C@@](O)/(C=C/C=C/C=C/C(=O)NC2=C(O)CCC2=O)[C@H]2[C@@H](C1=O)O2)C)C</chem>                                                                                                                        | 387                     | No               |
| 772                  | Asukamycin                                                       | <chem>O=C(NC1=C[C@@](O)/(C=C/C=C/C=C/C(=O)NC2=C(O)CCC2=O)[C@H]2[C@@H](C1=O)O2)/C=C/C=C/C1CCCC1</chem>                                                                                                                          | 387                     | Yes              |
| 773                  | Colabomycin A                                                    | <chem>C/C=C/C=C/C=C/C(=O)NC1=C[C@@](O)/(C=C/C=C/C=C/C(=O)NC2=C(O)CCC2=O)[C@H]2[C@@H](C1=O)O2</chem>                                                                                                                            | 387                     | No               |

| Comp No <sup>a</sup> | Name                                                                                                                                                                                            | SMILES <sup>b</sup>                                                                                                        | Cluster No <sup>c</sup> | Rep <sup>d</sup> |
|----------------------|-------------------------------------------------------------------------------------------------------------------------------------------------------------------------------------------------|----------------------------------------------------------------------------------------------------------------------------|-------------------------|------------------|
| 774                  | Manumycin G                                                                                                                                                                                     | <chem>CC(/C=C/C/C=C/C(=O)NC1=C[C@@](O)(/C=C/C=C/C/C(=O)NC2=C(O)CCC2=O)[C@H]2[C@@H](C1=O)O2)C</chem>                        | 387                     | No               |
| 775                  | Colabomycin E                                                                                                                                                                                   | <chem>C/C=C/C=C/C=C/C=C/C(=O)NC1=CC(O)(/C=C/C=C/C=C/C/C(=O)NC2=C(O)CCC2=O)C2C(C1=O)O2</chem>                               | 388                     | Yes              |
| 776                  | Salternamide A                                                                                                                                                                                  | <chem>OC(=O)CCCC[C@@]1(O)C=C(NC(=O)/C=C/[C@H](C[C@H](C=C(C)C)C)C(=O)C(=C1)Cl</chem>                                        | 389                     | Yes              |
| 777                  | Antibiotic U-62162                                                                                                                                                                              | <chem>OC(=O)CCCCC1(O)C=C(NC(=O)/C=C/C(CC(C=C(C)C)C)C)C(=O)C2C1O2</chem>                                                    | 389                     | No               |
| 778                  | Puupehenone                                                                                                                                                                                     | <chem>O=C1C=C2O[C@@]3(C)CC[C@@H]4[C@]([C@H]3C=C2C=C1O)(C)CCCC4(C)C</chem>                                                  | 390                     | Yes              |
| 779                  | (7E)-7-Ethyl-4-hydroxy-7-undecene-3,6-dione                                                                                                                                                     | <chem>CCC/C=C(/C(=O)CC(C(=O)CC)O)CC</chem>                                                                                 | 390                     | No               |
| 780                  | 2',5'-Dimethoxyflavone                                                                                                                                                                          | <chem>COc1ccc(cc1c1cc(=O)c2c(o1)cccc2)OC</chem>                                                                            | 391                     | Yes              |
| 781                  | JS1                                                                                                                                                                                             | <chem>CCCC1CCC(O1)c1cc(OC)c(c1)OC)OC</chem>                                                                                | 392                     | Yes              |
| 782                  | 4'-O-beta-D-Glucose pteridin A 10-O-alpha-D-glucose (1→6)-beta-D-glucoside                                                                                                                      | <chem>COc1ccc(cc1)c1cc(=O)c2c(o1)cc(cc2O)OC</chem>                                                                         | 393                     | Yes              |
| 783                  | 5,7,4'-Trimethoxyflavone                                                                                                                                                                        | <chem>COc1ccc(cc1)c1cc(=O)c2c(o1)cc(cc2OC)OC</chem>                                                                        | 393                     | No               |
| 784                  | 5-Hydroxy-7,4'-dimethoxyflavanone                                                                                                                                                               | <chem>COc1ccc(cc1)C1CC(=O)c2c(O1)cc(cc2O)OC</chem>                                                                         | 393                     | No               |
| 785                  | Naringenin trimethyl ether                                                                                                                                                                      | <chem>COc1ccc(cc1)C1CC(=O)c2c(O1)cc(cc2OC)OC</chem>                                                                        | 393                     | No               |
| 786                  | Genkwanin                                                                                                                                                                                       | <chem>COc1cc(O)c2c(c1)oc(cc2=O)c1ccc(cc1)O</chem>                                                                          | 394                     | No               |
| 787                  | 4'-Hydroxy-5,7-dimethoxyflavanone                                                                                                                                                               | <chem>COc1cc2OC(CC(=O)c2c(c1)OC)c1ccc(cc1)O</chem>                                                                         | 394                     | No               |
| 788                  | Sakuranetin                                                                                                                                                                                     | <chem>COc1cc2O[C@@H](CC(=O)c2c(c1)O)c1ccc(cc1)O</chem>                                                                     | 394                     | Yes              |
| 789                  | Naphterpin C                                                                                                                                                                                    | <chem>O=C1C2=C(OC([C@H]3C2=C[C@@](C)(O)CC3)(C)C)C(=O)c2c1cc(O)c(c2O)C</chem>                                               | 395                     | Yes              |
| 790                  | Naphterpin B                                                                                                                                                                                    | <chem>O=C1C2=C(OC([C@H]3C2=C[C@@](C)(O)CC3)(C)C)C(=O)c2c1cc(O)c(c2O)C</chem>                                               | 395                     | No               |
| 791                  | Naphterpin E                                                                                                                                                                                    | <chem>CC(=O)O[C@H]1CC2C(C[C@H]1C)C1=C(OC2(C)C)C(=O)c2c(C1=O)cc(c(c2O)C)O</chem>                                            | 395                     | No               |
| 792                  | Naphterpin D                                                                                                                                                                                    | <chem>C[C@H]1CC2C3=C(OC(C2C[C@@H]1O)(C)C)C(=O)c1c(C3=O)cc(c(c1O)C)O</chem>                                                 | 395                     | No               |
| 793                  | Debromomarinone                                                                                                                                                                                 | <chem>CC(=CCC[C@]1(C)OC2=C([C@@H]3[C@H]1CCC(=C3)C)C(=O)c1c(C2=O)c(O)cc(c1)O)C</chem>                                       | 395                     | No               |
| 794                  | Naphthgeranine B                                                                                                                                                                                | <chem>OCC1=CC2C(CC1)C(C)(C)OC1=C2C(=O)c2c(C1=O)c(O)cc(c2)O</chem>                                                          | 395                     | No               |
| 795                  | NSC640155                                                                                                                                                                                       | <chem>CC1=CC2C(CC1)C(C)(C)OC1=C2C(=O)c2c(C1=O)c(O)c(c2)O)C</chem>                                                          | 395                     | No               |
| 796                  | Naphthablin B                                                                                                                                                                                   | <chem>CCC(C(=O)O[C@H]1C[C@H]2[C@@H](C[C@H]1C)C1=C(OC2(C)C)C(=O)c2c(C1=O)cc(c1c2C[C@H]2[C@]1(C)CO[C@H]2O)O)C</chem>         | 396                     | No               |
| 797                  | Naphthablin                                                                                                                                                                                     | <chem>OCC(c1c(O)cc2c(c1O)C(=O)C1=C(C2=O)C2CC(C)C(CC2C(O1)(C)C)OC(=O)C(C)C)(C=C)C</chem>                                    | 396                     | No               |
| 798                  | Naphthablin C                                                                                                                                                                                   | <chem>O=C(C(C)O[C@H]1C[C@H]2[C@@H](C[C@H]1C)C1=C(OC2(C)C)C(=O)c2c(C1=O)cc(c1c2C[C@H]2[C@]1(C)CO[C@H]2O)O</chem>            | 396                     | Yes              |
| 799                  | (2R,3R,4S,5S,6R)-2-(((2E,4R,5R,6E,8E,11E)-13-(4-Hydroxy-6-methoxy-3-methylpyridin-2-yl)-3,5,7,11-tetramethyltrideca-2,6,8,11-tetraen-4-yl)oxy)-6-(hydroxymethyl)tetrahydro-2H-pyran-3,4,5-triol | <chem>OC[C@H]1O[C@@H](O[C@@H](/C=C/C)/C)[C@@H](/C=C/C/C(=C/Cc2[nH]c(OC)cc(=O)c2C)/C)C)[C@@H]([C@H]([C@@H]1O)O)O</chem>     | 397                     | No               |
| 800                  | (2R,3R,4S,5S,6R)-2-(((2E,4R,5R,6E,8E,11E)-1-Hydroxy-13-(4-hydroxy-5,6-dimethoxy-3-methylpyridin-2-yl)-3,5,7,11-tetramethyltrideca-2,6,8,11-tetraen-4-yl)oxy)-6-                                 | <chem>OC/C=C(/C@@H)([C@H](/C=C/C/C/C(=C/Cc1[nH]c(OC)c(c(=O)c1C)OC)/C)C)O[C@@H]1O[C@H](CO)[C@H]([C@@H]([C@H]1O)O)O)C</chem> | 397                     | No               |

| Comp No <sup>a</sup> | Name                                                           | SMILES <sup>b</sup>                                                                                                                     | Cluster No <sup>c</sup> | Rep <sup>d</sup> |
|----------------------|----------------------------------------------------------------|-----------------------------------------------------------------------------------------------------------------------------------------|-------------------------|------------------|
|                      | (hydroxymethyl)tetrahydro-2H-pyran-3,4,5-triol                 |                                                                                                                                         |                         |                  |
| 801                  | Glucopiericidin A                                              | <chem>OC[C@H]1O[C@@H](O[C@@H](C(=C/C)C)[C@@H](C=C/C/C(=C/Cc2[nH]c(OC)c(c=O)c2C)OC)/C)C[C@H]([C@H]([C@@H]1O)O)O</chem>                   | 397                     | Yes              |
| 802                  | PM050511                                                       | <chem>C/C=C/C(C/C=C/C/C=CC/C=C/c1oc(OC)c(c=O)c1C)C)C)OC1OC(CO)C(C(C1O)O)O)\C</chem>                                                     | 397                     | No               |
| 803                  | Glucopiericidinol A1                                           | <chem>OC[C@H]1O[C@@H](OC/C(=C/C)C)C/C=C/C=CC/C=C/c2[nH]c(OC)c(c=O)c2C)OC)(O)C)\C)C[C@H]([C@H]([C@@H]1O)O)O</chem>                       | 397                     | No               |
| 804                  | 13-Hydroxyglucopiericidin A                                    | <chem>OC/C=C([C@@H]([C@H](C=C/C/C(=C/Cc1[nH]c(OC)c(c=O)c1C)OC)/C)C)O[C@@H]1O[C@H](CO)[C@H]([C@H]([C@@H]1O)O)O)/C</chem>                 | 397                     | No               |
| 805                  | PM060431                                                       | <chem>OCC1OC(OC/C(=C/C)C)C/C=C/C=CC/C=C/c2oc(OC)c(c=O)c2C)CC)C)C)C(C(C1O)O)O</chem>                                                     | 397                     | No               |
| 806                  | 2-Hydroxymethyl-delta3, 4-glucopiericidin A                    | <chem>COC/C(=C/C=C/C(=C/C[C@H]([C@H](C=C/C)C)O[C@@H]1O[C@H](CO)[C@H]([C@@H]([C@H]1O)O)O)C)/C)C)Cc1nc(OC)c(c1C)O)OC</chem>               | 397                     | No               |
| 807                  | (11S,12R)-Piericidin C1 10-O-beta-D-glucoside                  | <chem>OC[C@H]1O[C@@H](O[C@@H]([C@@H]2(C)O[C@@H]2C)[C@@H](C=C/C=C/C(=C/Cc2nc(OC)c(c2C)O)OC)/C)C)C[C@H]([C@H]([C@@H]1O)O)O</chem>         | 397                     | No               |
| 808                  | 7-Demethyl-13-hydroxyglucopiericidin A                         | <chem>OC/C=C([C@@H]([C@H](C=C/C=C/C(=C/Cc1nc(OC)c(c1C)O)OC)/C)C)O[C@@H]1O[C@H](CO)[C@H]([C@H]([C@@H]1O)O)O)\C</chem>                    | 397                     | No               |
| 809                  | 5-Hydroxy-6-hydroxymethyl glucopiericidin A                    | <chem>CO[C@@H]([C@H](C/C(=C/Cc1nc(OC)c(c1C)O)OC)/C)O)/C=C/[C@H]([C@H](C=C/C)C)O[C@@H]1O[C@H](CO)[C@H]([C@H]([C@@H]1O)O)O)C)/C</chem>    | 397                     | No               |
| 810                  | 5-Hydroxy-6-hydroxymethyl-13-hydroxyglucopiericidin A          | <chem>OC/C=C([C@@H]([C@H](C=C/[C@H]([C@H](C/C(=C/Cc1nc(OC)c(c1C)O)OC)/C)O)OC)\C)C)O[C@@H]1O[C@H](CO)[C@H]([C@@H]([C@@H]1O)O)O)\C</chem> | 397                     | No               |
| 811                  | Phileucin                                                      | <chem>CCC(c1ncc([nH]c1=O)Cc1cccc1)C</chem>                                                                                              | 398                     | Yes              |
| 812                  | Benastatin A                                                   | <chem>CCCCCc1cc2ccc3c(c2c(c1C(=O)O)O)cc1c(c3O)C(=O)c2c(C1(C)C)cc(cc2O)O</chem>                                                          | 399                     | Yes              |
| 813                  | Benastatin B                                                   | <chem>CCCCCc1cc2CCc3c(c2c(c1C(=O)O)O)cc1c(c3O)C(=O)c2c(C1(C)C)cc(cc2O)O</chem>                                                          | 399                     | No               |
| 814                  | Benastatin C                                                   | <chem>CCCCCc1cc(O)c2c(c1)ccc1c2cc2c(c1O)C(=O)c1c(C2(C)C)cc(cc1O)O</chem>                                                                | 399                     | No               |
| 815                  | Citreaglycon A                                                 | <chem>COC1(C)OC(=O)c2c(C1)cc1c(c2O)c2c(CC1)c(O)c1c(c2O)c(=O)c2c(o1)ccc(c2O)C(=O)O</chem>                                                | 400                     | Yes              |
| 816                  | Dehydrocitreaglycon A                                          | <chem>COC1(C)OC(=O)c2c(C1)cc1c(c2O)c2c(CC1)cc1c(c2O)c(=O)c2c(o1)ccc(c2O)C(=O)O</chem>                                                   | 400                     | No               |
| 817                  | Lagunapyrone E                                                 | <chem>CCCCCc1ccc(oc1=O)[C@@H](C/C(=C/C/C=C/C/C(=C/C[C@H]([C@H]([C@@H](C=C/C)C)O)C)/C)C)C)O)C</chem>                                     | 401                     | No               |
| 818                  | Lagunapyrone C                                                 | <chem>CCCCCc1ccc(oc1=O)C([C@@H](C=C/C/C=C/C/C(=C/C[C@H]([C@H]([C@@H](C=C/C)C)O)C)/C)C)C)O)C</chem>                                      | 401                     | Yes              |
| 819                  | Lagunapyrone D                                                 | <chem>CCCCc1ccc(oc1=O)[C@@H](C/C(=C/C/C=C/C/C(=C/C[C@H]([C@H]([C@@H](C=C/C)C)O)C)/C)C)C)O)C</chem>                                      | 401                     | No               |
| 820                  | Lagunapyrone A                                                 | <chem>C/C=C([C@@H]([C@H](C=C/C/C(=C/C/C=C/C/[C@H](C1ccc(c(=O)o1)C)C)O)\C)/C)\C)C)O)C)O)\C</chem>                                        | 401                     | No               |
| 821                  | Lagunapyrone B                                                 | <chem>CCCCc1ccc(oc1=O)[C@@H]([C@H](C=C/C/C=C/C/C(=C/C[C@H]([C@H]([C@@H](C=C/C)C)O)C)/C)C)O)C)O)C</chem>                                 | 401                     | No               |
| 822                  | Isoxanthohumol                                                 | <chem>COc1cc(O)c(c2c1C(=O)CC(O2)c1ccc(cc1)O)CC=C(C)C</chem>                                                                             | 402                     | Yes              |
| 823                  | 6-Prenyl-4'-methoxy-5,7-dihydroxyflavanone                     | <chem>COc1ccc(cc1)[C@@H]1CC(=O)c2c(O1)cc(c2O)CC=C(C)C)O</chem>                                                                          | 403                     | Yes              |
| 824                  | (2'S)-5'-Lavandulyl-2'-methoxy-2,4,4',6'-tetrahydroxylchalcone | <chem>COc1cc(O)c(c(c1C(=O)/C=C/c1ccc(cc1O)O)O)C[C@@H](C(=C)C)CC=C(C)C</chem>                                                            | 404                     | Yes              |
| 825                  | 5'-Lavandulyl-4'-methoxy-2,4,2',6'-tetrahydroxylchalcone       | <chem>COc1cc(O)c(c(c1C[C@@H](C(=C)C)CC=C(C)C)O)C(=O)/C=C/c1ccc(cc1O)O</chem>                                                            | 404                     | No               |
| 826                  | (2S,2'S)-6-Lavandulyl-5,7,2',4'-tetrahydroxylflavanone         | <chem>CC(=CC[C@H](C(=C)C)Cc1c(O)cc2c(c1O)C(=O)C[C@H](O2)c1ccc(cc1O)O)C</chem>                                                           | 404                     | No               |
| 827                  | Benthocyanin A                                                 | <chem>c1cccc1.C/C(=C/Cn1c2cc3c(cc2nc2c1cccc2C(=O)O)oc(=O)c3C)/CCC=C(C)C</chem>                                                          | 405                     | Yes              |
| 828                  | Benthocyanin B                                                 | <chem>C/C(=C/Cn1c2cccc2nc2c1cc1c(c2C(=O)O)oc(=O)c1C)/CCC=C(C)C</chem>                                                                   | 405                     | No               |
| 829                  | Piericidin B5 N-Oxide                                          | <chem>CC/C=C/C/C(=C/C(=C/C(=C/Cc1c(C)C)O)C)C([n+][O-])OC)OC)/C)C)OC)\C</chem>                                                           | 406                     | No               |
| 830                  | Piericidin C4                                                  | <chem>COc1nc(C/C=C/C(=C/C(=C/C(C2(C)OC2C(C)C)O)C)/C)C)C)C(c(c1OC)O)C</chem>                                                             | 406                     | No               |

| Comp No <sup>a</sup> | Name                                                                                                                                              | SMILES <sup>b</sup>                                                                                                                                                                                                                                                                                                                     | Cluster No <sup>c</sup> | Rep <sup>d</sup> |
|----------------------|---------------------------------------------------------------------------------------------------------------------------------------------------|-----------------------------------------------------------------------------------------------------------------------------------------------------------------------------------------------------------------------------------------------------------------------------------------------------------------------------------------|-------------------------|------------------|
| 831                  | 2-((2E,5E,7E,9R,10R)-10-((2S,3S)-2,3-Dimethyloxiran-2-yl)-10-hydroxy-3,5,7,9-tetramethyldeca-2,5,7-trien-1-yl)-5,6-dimethoxy-3-methylpyridin-4-ol | COCc1nc(C/C=C(/C/C(=C/C(=[C@H]([C@H]([C@]2(C)O[C@H]2C)O)C)/C)/C)\C)c(c(c1OC)O)C                                                                                                                                                                                                                                                         | 406                     | No               |
| 832                  | Piericidin C6                                                                                                                                     | CCC1OC1(C)C(C(/C=C(\C=C(\C/C(=C/Cc1nc(OC)c(c(c1C)O)OC)/C)/C)/C)O                                                                                                                                                                                                                                                                        | 406                     | No               |
| 833                  | Piericidin C5                                                                                                                                     | CCC1OC1(C)C(C(/C=C(\C=C(\C/C(=C/Cc1nc(OC)c(c(c1C)O)OC)/C)/C)O                                                                                                                                                                                                                                                                           | 406                     | No               |
| 834                  | 11-Demethylpiericidin A                                                                                                                           | C/C=C/[C@@H]([C@@H])(/C=C(/C=C/C/C(=C/Cc1nc(OC)c(c(c1C)O)OC)/C)\C)C)O                                                                                                                                                                                                                                                                   | 406                     | No               |
| 835                  | (2E,5E,7E,11E,9R,10R,13R,19S)-13,19-Dihydroxyl-IT-143-A                                                                                           | COCc1c(OC)nc(c(c1O)C)C/C=C(/C/C(=C/C(=[C@H]([C@H](/C(=C/[C@@]([C@H](O)C)(O)C)/C)O)C)/C)/C)\C                                                                                                                                                                                                                                            | 406                     | No               |
| 836                  | (2E,5E,7E,11E,9R,10R,13S,19R)-13,19-Dihydroxyl-IT-143-A                                                                                           | COCc1c(OC)nc(c(c1O)C)C/C=C(/C/C(=C/C(=[C@H]([C@H](/C(=C/[C@]([C@H](O)C)(O)C)/C)O)C)/C)/C)\C                                                                                                                                                                                                                                             | 406                     | No               |
| 837                  | Piericidin A3                                                                                                                                     | COCc1nc(C/C=C(/C/C=C/C/C(=C/C(C/C)/C)O)C)/C)\C)c(c(c1OC)O)C                                                                                                                                                                                                                                                                             | 406                     | No               |
| 838                  | 2-((2E,5E,7E,9R,10R,11E)-10-Hydroxy-3,5,7,9,11-pentamethyltrideca-2,5,7,11-tetraen-1-yl)-5,6-dimethoxy-3-methylpyridin-4-ol                       | C/C=C(/[C@@H]([C@@H])(/C=C(/C=C(/C/C(=C/Cc1nc(OC)c(c(c1C)O)OC)/C)\C)C)O)C                                                                                                                                                                                                                                                               | 406                     | Yes              |
| 839                  | Spinosyn A                                                                                                                                        | CC[C@H]1CCCC[C@H](O[C@H]2CC[C@H]([C@H](O2)C)N(C)C)[C@@H](C)C(=O)C2=C[C@@H]3[C@H]([C@@H]2CC(=O)O1)C=C[C@H]1[C@H]3C[C@@H](C1)O[C@@H]1O[C@@H](C)[C@@H]([C@H]([C@H]1OC)OC)OC                                                                                                                                                                | 407                     | Yes              |
| 840                  | Spinosyn B                                                                                                                                        | CC[C@H]1CCCC[C@H](O[C@H]2CC[C@H]([C@H](O2)C)NC)[C@@H](C)C(=O)C2=C[C@@H]3[C@H]([C@@H]2CC(=O)O1)C=C[C@H]1[C@H]3C[C@@H](C1)O[C@@H]1O[C@@H](C)[C@@H]([C@H]([C@H]1OC)OC)OC                                                                                                                                                                   | 407                     | No               |
| 841                  | Spinosad                                                                                                                                          | CC[C@H]1CCCC(O[C@H]2CC[C@H]([C@H](O2)C)N(C)C)[C@@H](C)C(=O)C2=C[C@@H]3[C@H]([C@@H]2CC(=O)O1)C=C[C@H]1[C@H]3C[C@@H](C1)O[C@@H]1O[C@@H](C)[C@@H]([C@H]([C@H]1OC)OC)OC.CC[C@H]1CCCC(O[C@H]2CC[C@H]([C@H](O2)C)N(C)C)[C@@H](C)C(=O)C2=C[C@@H]3[C@H]([C@@H]2CC(=O)O1)C=C[C@H]1[C@H]3C[C@@H](C1)O[C@@H]1O[C@@H](C)[C@@H]([C@H]([C@H]1OC)OC)OC | 407                     | No               |
| 842                  | 5-O-Desosaminylplatenolide                                                                                                                        | CCC1CC(C)C(=O)/C=C\C=C\CC(OC(=O)CC(C(C1OC1OC(C)CC(C1O)N(C)C)OC)O)C                                                                                                                                                                                                                                                                      | 408                     | Yes              |
| 843                  | Desosaminyl ty lactone                                                                                                                            | CC[C@H]1C[C@@H](C)C(=O)/C=C/C(=C/[C@@H]([C@H](OC(=O)C[C@H]([C@@H]([C@H]1OC1OC(C)CC(C1O)N(C)C)O)CC)C)/C                                                                                                                                                                                                                                  | 409                     | Yes              |
| 844                  | D-Quinovosyl-tylactone                                                                                                                            | CC[C@H]1C[C@@H](C)C(=O)/C=C/C(=C/[C@@H]([C@H](OC(=O)C[C@H]([C@@H]([C@H]1OC1OC(C)C(C(C1O)O)O)C)O)CC)C)/C                                                                                                                                                                                                                                 | 409                     | No               |
| 845                  | Dihydronicromycin                                                                                                                                 | CCC1OC(=O)C(C)C(=O)C(C)C(OC2OC(C)CC(C2O)N(C)C)C(CC(C(=O)CCC1(C)O)C)C                                                                                                                                                                                                                                                                    | 410                     | No               |
| 846                  | Narbomycin                                                                                                                                        | CC[C@H]1OC(=O)[C@H](C)C(=O)[C@H](C)[C@@H](O[C@@H]2O[C@H](C)C[C@@H]([C@H]2O)N(C)C)[C@H](C)[C@H](C(=O)/C=C/[C@H]1C)C)C                                                                                                                                                                                                                    | 410                     | No               |
| 847                  | Albomycetin                                                                                                                                       | CCC1OC(=O)C(C)C(=O)C(C)C(OC2OC(C)CC(C2O)N(C)C)C(CC(C(=O)/C=C\C1(C)O)C)C                                                                                                                                                                                                                                                                 | 410                     | No               |
| 848                  | Dihydronicromycin                                                                                                                                 | CC[C@H]1OC(=O)[C@H](C)[C@@H](O)[C@H](C)[C@@H](O[C@@H]2O[C@H](C)C[C@@H]([C@@H]2O)N(C)C)[C@H](C)[C@H](C(=O)/C=C/[C@]1(C)O)C)C                                                                                                                                                                                                             | 410                     | Yes              |
| 849                  | Neopikromycin                                                                                                                                     | C[C@H]1O[C@@H](O[C@H]2[C@@H](C)C[C@@H](C)C(=O)/C=C/[C@H]([C@H](OC(=O)[C@@H](C(=O)[C@@H]2C)C)[C@H](O)C)C)[C@@H]([C@H](C1)N(C)C)O                                                                                                                                                                                                         | 410                     | No               |
| 850                  | Novapikromycin                                                                                                                                    | C[C@H]1O[C@@H](O[C@H]2[C@@H](C)C[C@@H](C)C(=O)/C=C/[C@]([C@H](OC(=O)[C@@H](C(=O)[C@@H]2C)C)[C@H](O)C)O)[C@@H]([C@H](C1)N(C)C)O                                                                                                                                                                                                          | 410                     | No               |
| 851                  | 3'-Demethylnemomethymycin                                                                                                                         | CNC1CC(C)OC(C1O)O[C@H]1[C@@H](C)C[C@@H](C)C(=O)/C=C/[C@H]([C@H](OC(=O)[C@@H]1C)[C@H](O)C)C                                                                                                                                                                                                                                              | 411                     | Yes              |
| 852                  | Nemomethymycin                                                                                                                                    | C[C@H]1O[C@@H](O[C@H]2[C@@H](C)C[C@@H](C)C(=O)/C=C/[C@H]([C@H](OC(=O)[C@@H]2C)[C@H](O)C)C)[C@@H]([C@H](C1)N(C)C)O                                                                                                                                                                                                                       | 411                     | No               |
| 853                  | 3'-Demethylmethymycin                                                                                                                             | CNC1CC(C)OC(C1O)O[C@H]1[C@@H](C)C[C@@H](C)C(=O)/C=C/[C@]([C@H](OC(=O)[C@@H]1C)CC)C)O                                                                                                                                                                                                                                                    | 412                     | No               |
| 854                  | 10-Deoxymethymycin                                                                                                                                | CC[C@H]1OC(=O)[C@H](C)[C@@H](O[C@@H]2O[C@H](C)C[C@@H]([C@H]2O)N(C)C)[C@@H](C)C[C@@H](C(=O)/C=C/[C@H]1C)C                                                                                                                                                                                                                                | 412                     | No               |

| Comp No <sup>a</sup> | Name                                                                           | SMILES <sup>b</sup>                                                                                                                                                                                               | Cluster No <sup>c</sup> | Rep <sup>d</sup> |
|----------------------|--------------------------------------------------------------------------------|-------------------------------------------------------------------------------------------------------------------------------------------------------------------------------------------------------------------|-------------------------|------------------|
| 855                  | Methymycin                                                                     | <chem>CC[C@H]1OC(=O)[C@H](C)[C@@H](O[C@@H]2O[C@H](C)C[C@@H]([C@H]2O)N(C)C)[C@@H](C)[C@H](C(=O)/C=C/[C@]1(C)O)C</chem>                                                                                             | 412                     | Yes              |
| 856                  | 3'-Demethyldeoxymethymycin                                                     | <chem>CNC1CC(C)OC(C1O)O[C@H]1[C@@H](C)C[C@@H](C)C(=O)/C=C/[C@H]([C@H](OC(=O)[C@@H]1C)CC)C</chem>                                                                                                                  | 412                     | No               |
| 857                  | Chimeramycin A                                                                 | <chem>O=C[C@H]1C[C@@H](C)C/C=C/C(=C/[C@H]([C@H](OC(=O)[C@H]([C@H]1O[C@@H]1O[C@H](C)[C@H]([C@@H]([C@H]1O)N(C)C)O[C@@H]1O[C@H](C)[C@@H]([C@](C1)(C)O)O)C)OC(=O)C)CC(C)/C)O[C@H]1CC[C@@H]([C@H](O1)C)N(C)C</chem>    | 413                     | Yes              |
| 858                  | Chimeramycin B                                                                 | <chem>O=C[C@H]1C[C@@H](C)C/C=C/C(=C/[C@H]([C@H](OC(=O)[C@H]([C@H]1O[C@@H]1O[C@H](C)[C@H]([C@@H]([C@H]1O)N(C)C)O[C@@H]1O[C@H](C)[C@@H]([C@](C1)(C)O)O)C)O)CC(C)/C)O[C@H]1CC[C@@H]([C@H](O1)C)N(C)C</chem>          | 413                     | No               |
| 859                  | Relomycin                                                                      | <chem>OCCC1CC(C)C(=O)/C=C/C(=C(C(C(C(C(C1O)N(C)C)OC1OC(C)C(C(C1)(C)O)O)C)O)CC(C)OC1OC(C)C(C(C1O)N(C)C)OC1OC(C)C(C(C1)(C)O)O)C</chem>                                                                              | 414                     | Yes              |
| 860                  | Flurithromycin                                                                 | <chem>CC[C@H]1OC(=O)[C@H](C)[C@@H](O[C@@H]2O[C@H](C)[C@@H]([C@H]2O)N(C)C)[C@@H]([C@](C2)(C)OC)O)[C@H](C)[C@@H](O[C@@H]2O[C@H](C)C[C@@H]([C@H]2O)N(C)C)[C@](C[C@H](C(=O)[C@@H]([C@H]([C@]1(C)O)O)C(C)F)(C)O</chem> | 415                     | No               |
| 861                  | Auricin                                                                        | <chem>CC[C@H]1OC(=O)[C@H](C)[C@@H](O[C@@H]2O[C@H](C)[C@@H]([C@H]2O)N(C)C)[C@@H]([C@](C2)(C)OC)O)[C@H](C)[C@@H](O[C@@H]2O[C@H](C)C[C@@H]([C@H]2O)N(C)C)[C@](C[C@H](CN([C@@H]([C@H]([C@]1(C)O)O)C(C)C)(C)O</chem>   | 415                     | No               |
| 862                  | Erythromycin                                                                   | <chem>CC[C@H]1OC(=O)[C@H](C)[C@@H](O[C@@H]2O[C@H](C)[C@@H]([C@H]2O)N(C)C)[C@@H]([C@](C2)(C)OC)O)[C@H](C)[C@@H](O[C@@H]2O[C@H](C)C[C@@H]([C@H]2O)N(C)C)[C@](C[C@H](C(=O)[C@@H]([C@H]([C@]1(C)O)O)C(C)C)(C)O</chem> | 415                     | Yes              |
| 863                  | Spectomycin B1                                                                 | <chem>OC(=O)C=C(C1c2cc3ccc(c(c3c(c2C(=O)CC1(C)O)O)O)c1ccc2c(c1O)c(O)c1c(c2)C(C(=CC(=O)O)C)C(CC1=O)(C)O)C</chem>                                                                                                   | 416                     | Yes              |
| 864                  | Julichrome Q6.6                                                                | <chem>CC(=O)OC(C1c2cc3ccc(c(c3c(c2C(=O)CC1(C)O)O)O)c1ccc2c(c1O)c(O)c1c(c2)C(C(OC(=O)C)C)C(C(C1=O)(C)O)C</chem>                                                                                                    | 416                     | No               |
| 865                  | Nivetetracyclate B                                                             | <chem>COC(=O)[C@@H]1c2cc3cc4[C@H](O)CCC(=O)c4c(c3c(c2CC[C@]1(O)CC)O)O</chem>                                                                                                                                      | 417                     | Yes              |
| 866                  | Nivetetracyclate A                                                             | <chem>COC(=O)[C@@H]1c2cc3c(O)c4C(=O)CC[C@H](c4cc3c(c2CC[C@]1(O)CC)O)O</chem>                                                                                                                                      | 418                     | Yes              |
| 867                  | Julichrome Q6                                                                  | <chem>CC(=O)O[C@@H]([C@@H]1c2cc3cccc(c3c(c2C(=O)C[C@]1(C)O)O)O)C</chem>                                                                                                                                           | 419                     | No               |
| 868                  | 12T061A                                                                        | <chem>CC(=O)O[C@H]([C@H]1c2c(C(=O)C[C@@]1(C)O)c(O)c1c(c2O)cccc1O)C</chem>                                                                                                                                         | 419                     | Yes              |
| 869                  | 12T061C                                                                        | <chem>COc1cccc2c1c(O)c1C(=O)C[C@@]([C@H](c1c2O)[C@@H](OC(=O)C)C)(C)O</chem>                                                                                                                                       | 419                     | No               |
| 870                  | Chrymutasin                                                                    | <chem>CO[C@@H]1[C@@H](O)[C@@H](O[C@@H]2[C@@H](O[C@@H]([C@@H]([C@@H]2O)O)C)Oc2cc3c2c2oc(=O)c4c5c2c(c3O)c(=N)c(=O)c5ccc4C)O[C@@H]([C@@H]1O)C</chem>                                                                 | 420                     | Yes              |
| 871                  | BE 12406B                                                                      | <chem>O[C@H]1[C@@H](O[C@H]([C@@H]([C@H]1O)O)C)Oc1cc2c(c3c1c(O)ccc3)oc(=O)c1c2c(O)cc(c1)C</chem>                                                                                                                   | 421                     | Yes              |
| 872                  | BE 12406A                                                                      | <chem>COc1cc(C)cc2c1c1cc(O[C@H]3O[C@@H](C)[C@@H]([C@H]([C@H]3O)O)O)c3c(c1oc2=O)cccc3O</chem>                                                                                                                      | 421                     | No               |
| 873                  | (5R)-5-hydroxy-3-[[2-(4-hydroxyphenyl)ethyl]amino]-5-vinyl-2-cyclopenten-1-one | <chem>C=C[C@]1(O)CC(=CC1=O)NCCc1ccc(cc1)O</chem>                                                                                                                                                                  | 422                     | Yes              |
| 874                  | Formicapyridine B                                                              | <chem>COc1cc(C)c(c(c1O)c1nc(C)cc2c1c(O)c1c(c2)C(C)(C)c2c(C1=O)c(O)cc(c2)O</chem>                                                                                                                                  | 423                     | No               |
| 875                  | Formicapyridine C                                                              | <chem>COc1cc(C)c(c(c1)OC)c1nc(C)cc2c1c(O)c1c(c2)C(C)(C)c2c(C1=O)c(O)cc(c2)O</chem>                                                                                                                                | 423                     | No               |
| 876                  | Formicapyridine H                                                              | <chem>COc1cc(C)c(c(c1O)c1nc(C)cc2c1c(O)c1c(c2)C(C)(C)c2c(C1=O)c(O)c(c(c2)O)Br</chem>                                                                                                                              | 423                     | Yes              |
| 877                  | Formicapyridine I                                                              | <chem>COc1cc(C)c(c(c1)OC)c1nc(C)cc2c1c(O)c1c(c2)C(C)(C)c2c(C1=O)c(O)c(c(c2)O)Br</chem>                                                                                                                            | 423                     | No               |
| 878                  | Formicapyridine G                                                              | <chem>Oc1cc(C)c(c(c1O)c1nc(C)cc2c1c(O)c1c(c2)C(C)(C)c2c(C1=O)c(O)c(c(c2)O)Br</chem>                                                                                                                               | 423                     | No               |
| 879                  | Formicapyridine A                                                              | <chem>Oc1cc(C)c(c(c1O)c1nc(C)cc2c1c(O)c1c(c2)C(C)(C)c2c(C1=O)c(O)cc(c2)O</chem>                                                                                                                                   | 423                     | No               |
| 880                  | Bagremycin G                                                                   | <chem>O=CNc1cc(ccc1O)C(=O)Oc1ccc(cc1)C=C</chem>                                                                                                                                                                   | 424                     | No               |
| 881                  | Bagremycin B                                                                   | <chem>C=Cc1ccc(cc1)OC(=O)c1ccc(c(c1)NC(=O)C)O</chem>                                                                                                                                                              | 424                     | No               |
| 882                  | Bagremycin D                                                                   | <chem>C=Cc1ccc(cc1)OC(=O)c1ccc(c(c1S)N)O</chem>                                                                                                                                                                   | 424                     | No               |
| 883                  | Bagremycin E                                                                   | <chem>C=Cc1ccc(cc1)OC(=O)c1ccc(cc1)O</chem>                                                                                                                                                                       | 424                     | Yes              |
| 884                  | Watasemycin                                                                    | <chem>C[C@@H]1SC(=N[C@H]1[C@@H]1SC[C@](N1C)(C)C(=O)O)c1cccc1O</chem>                                                                                                                                              | 425                     | Yes              |
| 885                  | 4-Benzoxazolecarboxylic acid, 2-(5-chloro-2-hydroxyphenyl)-                    | <chem>Clc1ccc(c(c1)c1oc2c(n1)c(ccc2)C(=O)O)O</chem>                                                                                                                                                               | 426                     | No               |

| Comp No <sup>a</sup> | Name                                                                                                                                    | SMILES <sup>b</sup>                                                                                                                                                                     | Cluster No <sup>c</sup> | Rep <sup>d</sup> |
|----------------------|-----------------------------------------------------------------------------------------------------------------------------------------|-----------------------------------------------------------------------------------------------------------------------------------------------------------------------------------------|-------------------------|------------------|
| 886                  | 4-Benzoxazolecarboxylic acid, 2-(3-chloro-2-hydroxyphenyl)-                                                                             | <chem>OC(=O)c1cccc2c1nc(o2)c1cccc(c1O)Cl</chem>                                                                                                                                         | 426                     | No               |
| 887                  | 4-Benzoxazolecarboxylic acid, 2-(2-hydroxy-5-methylphenyl)-                                                                             | <chem>Cc1ccc(c(c1)c1oc2c(n1)c(ccc2)C(=O)O)O</chem>                                                                                                                                      | 426                     | No               |
| 888                  | Caboxamycin                                                                                                                             | <chem>Oc1cccc1c1oc2c(n1)c(ccc2)C(=O)O</chem>                                                                                                                                            | 426                     | Yes              |
| 889                  | 4-Benzoxazolecarboxylic acid, 2-(2-hydroxy-5-methoxyphenyl)-                                                                            | <chem>COc1ccc(c(c1)c1oc2c(n1)c(ccc2)C(=O)O)O</chem>                                                                                                                                     | 426                     | No               |
| 890                  | 3'-Hydroxycaboxamycin                                                                                                                   | <chem>OC(=O)c1cccc2c1nc(o2)c1cccc(c1O)O</chem>                                                                                                                                          | 426                     | No               |
| 891                  | 4-Benzoxazolecarboxylic acid, 2-(4-chloro-2-hydroxyphenyl)-                                                                             | <chem>Clc1ccc(c(c1)O)c1oc2c(n1)c(ccc2)C(=O)O</chem>                                                                                                                                     | 426                     | No               |
| 892                  | 4-Benzoxazolecarboxylic acid, 2-(2-hydroxy-4-methylphenyl)-                                                                             | <chem>Cc1ccc(c(c1)O)c1oc2c(n1)c(ccc2)C(=O)O</chem>                                                                                                                                      | 426                     | No               |
| 893                  | O-Methylcaboxamycin                                                                                                                     | <chem>COC(=O)c1cccc2c1nc(o2)c1cccc1O</chem>                                                                                                                                             | 427                     | Yes              |
| 894                  | 4-Benzoxazolecarboxylic acid, 2-(2-chloro-6-hydroxyphenyl)-, methyl ester                                                               | <chem>COC(=O)c1cccc2c1nc(o2)c1c(O)cccc1Cl</chem>                                                                                                                                        | 427                     | No               |
| 895                  | 4-Benzoxazolecarboxylic acid, 2-(3-hydroxy-2-pyridinyl)-, methyl ester                                                                  | <chem>COC(=O)c1cccc2c1nc(o2)c1ncccc1O</chem>                                                                                                                                            | 427                     | No               |
| 896                  | 4-Benzoxazolecarboxylic acid, 2-(2-hydroxy-4-methylphenyl)-, methyl ester                                                               | <chem>COC(=O)c1cccc2c1nc(o2)c1ccc(cc1O)C</chem>                                                                                                                                         | 427                     | No               |
| 897                  | 5-Hydroxy-nataxazole                                                                                                                    | <chem>COC(=O)c1cccc2c1nc(o2)c1cccc2c1nc(o2)c1c(O)ccc(c1C)O</chem>                                                                                                                       | 428                     | Yes              |
| 898                  | UK-1                                                                                                                                    | <chem>COC(=O)c1cccc2c1nc(o2)c1cccc2c1nc(o2)c1cccc1O</chem>                                                                                                                              | 428                     | No               |
| 899                  | Antibiotic A 33853                                                                                                                      | <chem>Oc1cccc(c1NC(=O)c1ncccc1O)c1oc2c(n1)c(ccc2)C(=O)O</chem>                                                                                                                          | 429                     | Yes              |
| 900                  | Benzoic acid, 4-[[3-hydroxy-2-pyridinyl]carbonyl]amin o]-, methyl ester                                                                 | <chem>COC(=O)c1ccc(cc1)NC(=O)c1ncccc1O</chem>                                                                                                                                           | 430                     | Yes              |
| 901                  | Phenazinomycin                                                                                                                          | <chem>C/C(=C\Cn1c2cccc2nc2c1cccc2=O)/CC[C@@H]1C(=C)CCCC1(C)C</chem>                                                                                                                     | 431                     | Yes              |
| 902                  | Lavanducyanin                                                                                                                           | <chem>CC1=C(CCC(C1)(C)C)Cn1c2cccc2nc2c1cccc2=O</chem>                                                                                                                                   | 431                     | No               |
| 903                  | Arylomycin A4                                                                                                                           | <chem>OCC(N(C(=O)CCCCCCCCC(CC)C)C)C(=O)NC(C(=O)NCC(=O)N(C1C(=O)NC(C)C(=O)NC(Cc2cc(c3cc1ccc3O)c(O)cc2)C(=O)O)C)C</chem>                                                                  | 432                     | Yes              |
| 904                  | 2-[2-(2-[2-(N,10-Dimethyldodecanamido)-3-hydroxypropanamido]propanamido)-N-methylacetamido]-2-(4-hydroxyphenyl)acetamido]propanoic acid | <chem>CCC(CCCCCCCCCC(=O)N(C(C(=O)NC(C(=O)NCC(=O)N(C(C(=O)NC(C(=O)O)C)c1ccc(cc1O)C)C)C)O)C)C</chem>                                                                                      | 432                     | No               |
| 905                  | Bonnevillamide B                                                                                                                        | <chem>COc1c(Cl)cc(cc1Cl)/C=C/C(=O)N[C@H](C(=O)N[C@H](C(=O)N1[C@H](C)[C@H](C[C@H]1C(=O)N[C@H](C(=O)N[C@H](C(=O)N1CCC[C@H]1C(=O)O)C(C)O)CC(C)O)CC(C)C)[C@H](O)C)\O</chem>                 | 433                     | No               |
| 906                  | Bonnevillamide A                                                                                                                        | <chem>COC(=O)[C@H]1C[C@H](N1C(=O)[C@@H](NC(=O)[C@@H](NC(=O)[C@@H]1C[C@@H]([C@H](N1C(=O)[C@@H](NC(=O)[C@@H]([C@H](O)C)NC(=O)C(=Cc1cc(Cl)c(c1)Cl)O)O)CC(C)C)OC(=O)C)CC(C)O)C(C)C)C</chem> | 433                     | No               |

| Comp No <sup>a</sup> | Name                                                     | SMILES <sup>b</sup>                                                                                                                                                               | Cluster No <sup>c</sup> | Rep <sup>d</sup> |
|----------------------|----------------------------------------------------------|-----------------------------------------------------------------------------------------------------------------------------------------------------------------------------------|-------------------------|------------------|
| 907                  | Bonnevillamide C                                         | <chem>COc1c(Cl)cc(cc1Cl)/C=C/(C(=O)N[C@H](C(=O)N[C@H](C(=O)N1[C@H](C)[C@H](C[C@H]1C(=O)N[C@H](C(=O)N[C@H](C(=O)N1CCC[C@H]1C(=O)O)C(C)C)O)CC(C)C)OC(=O)C)CC(C)C)[C@H](O)C)O</chem> | 433                     | Yes              |
| 908                  | Acyldepsipeptide 2                                       | <chem>C[C@H]1CN2[C@@H](C1)C(=O)OC[C@H](NC(=O)[C@H](Cc1cc(F)cc(c1)F)NC(=O)CCC1CCCCC1)C(=O)N1CCC[C@H]1C(=O)N1[C@H](C(=O)N[C@H](C2=O)C)CCCC1</chem>                                  | 434                     | Yes              |
| 909                  | Acyldepsipeptide 4                                       | <chem>CCCC/C=C/C(=O)N[C@H](C(=O)N[C@H]1COC(=O)[C@@H]2C[C@H](CN2C(=O)[C@H](C)NC(=O)[C@H]2N(C(=O)[C@H]3N(C1=O)CCC3)CCCC2)C)Cc1cc(F)cc(c1)F</chem>                                   | 434                     | No               |
| 910                  | ADEP1                                                    | <chem>C/C=C/C=C/C(=O)N[C@H](C(=O)N[C@H]1COC(=O)[C@@H]2CC(CN2C(=O)[C@H](C)NC(=O)[C@H](N(C(=O)[C@H]2N(C1=O)CCC2)C)C)Cc1ccccc1</chem>                                                | 435                     | No               |
| 911                  | A54556 Factor A                                          | <chem>C/C=C/C=C/C(=O)N[C@H](C(=O)N[C@H]1COC(=O)[C@@H]2C[C@H](CN2C(=O)[C@H](C)NC(=O)[C@H](N(C(=O)[C@H]2N(C1=O)CCC2)C)C)Cc1ccccc1</chem>                                            | 435                     | Yes              |
| 912                  | ADEP                                                     | <chem>C/C=C/C=C/C(=O)NC(C(=O)NC1COC(=O)C2CC(CN2C(=O)C(C)NC(=O)C(N(C(=O)C2N(C1=O)CCC2)C)C)Cc1ccccc1</chem>                                                                         | 435                     | No               |
| 913                  | Enopeptin A                                              | <chem>CC1CN2C(C1)C(=O)OCC(NC(=O)C(Cc1ccccc1)NC(=O)/C=C/C=C/C=C/C=C/C(=O)NC1=C(O)CCC1=O)C(=O)N1CCCC1C(=O)N(C(C(=O)NC(C2=O)C)C)C</chem>                                             | 436                     | Yes              |
| 914                  | Kromycin                                                 | <chem>CC[C@H]1OC(=O)[C@H](C)C(=O)/C=C/[C@H](C[C@H](C(=O)/C=C/[C@H]1(C)O)C)C)/C</chem>                                                                                             | 437                     | Yes              |
| 915                  | Formicamycin M                                           | <chem>COc1cc(C)c(c(c1)OC)c1cc(OC)c(c2c1C(=O)[C@@H]1([C@H](C2)C(C)(C)c2c(C1=O)c(O)cc(c2)O)O)Br</chem>                                                                              | 438                     | Yes              |
| 916                  | Penicisteroid C                                          | <chem>O[C@H]1CC[C@]2(C(=C[C@@H](C3[C@H]2[C@H](O)C[C@]2([C@H]3C[C@@H]([C@@H]2[C@@H]/C=C/[C@H](C(C)C)C)OC(=O)C)O)C1)C</chem>                                                        | 439                     | Yes              |
| 917                  | Sitosteryl 3-beta-D-glucoside                            | <chem>CC[C@@H](C(C)C)CC[C@H]([C@H]1CC[C@@H]2[C@]1(C)CC[C@H]1[C@H]2CC=C2[C@]1(C)C[C@@H](C2)O[C@H]1O[C@H](CO)[C@H]([C@@H]([C@H]1O)O)O)C</chem>                                      | 440                     | Yes              |
| 918                  | 14-Hydroxycyclooctatin                                   | <chem>OC[C@@H]1C[C@H]([C@@H]2[C@@H]1C[C@@]1(C)CC[C@](C1=CC[C@]2(C)O)(O)C(C)C)O</chem>                                                                                             | 441                     | Yes              |
| 919                  | 12alpha-Hydroxycyclooctatin                              | <chem>OC[C@@H]1C[C@H]([C@@H]2[C@@H]1C[C@@]1(C)[C@H](O)C[C@@H](C1=CC[C@]2(C)O)C(C)C)O</chem>                                                                                       | 442                     | Yes              |
| 920                  | 12beta-Hydroxycyclooctatin                               | <chem>OC[C@@H]1C[C@H]([C@@H]2[C@@H]1C[C@@]1(C)[C@H](O)C[C@@H](C1=CC[C@]2(C)O)C(C)C)O</chem>                                                                                       | 442                     | No               |
| 921                  | 16,17-Dihydroxycyclooctatin                              | <chem>OCC([C@@H]1CC[C@@]2(C1=CC[C@@](C)(O)[C@@H]1[C@H](C2)[C@@H](CC)C[C@@H]1O)C)CO</chem>                                                                                         | 442                     | No               |
| 922                  | CHEBI:67808                                              | <chem>OC[C@H]([C@H]1CC[C@]2(C1=CC[C@](C)(O)[C@H]1[C@H](C2)[C@H](CO)C[C@H]1O)C)C</chem>                                                                                            | 442                     | No               |
| 923                  | Cyclooctatin                                             | <chem>OCC1CC(C2C1CC1(C)CCC(C1=CCC2(C)O)C(C)C)O</chem>                                                                                                                             | 443                     | Yes              |
| 924                  | Ergosta-8(9),22-diene-3beta,5alpha,6beta,7alpha-tetraol  | <chem>O[C@H]1CC[C@]2([C@@](C1)(O)[C@H](O)[C@@H](C13C2(CC[C@]2(C3CC[C@@H]2[C@@H]/C=C/C(C(C)C)C)C)C1)O)C</chem>                                                                     | 444                     | No               |
| 925                  | Ananstrep A                                              | <chem>OCC([C@H]/C=C/[C@H]([C@H]1CC[C@@H]2[C@]1(C)CC[C@H]1C2=C[C@H]([C@@]2([C@]1(C)CC[C@@H](C2)O)O)O)C)C</chem>                                                                    | 444                     | No               |
| 926                  | Ergosta-7,22-diene-3beta,5alpha,6beta-triol              | <chem>O[C@H]1CC[C@]2([C@@](C1)(O)[C@H](O)C=C1[C@@H]2CC[C@]2([C@H]1CC[C@@H]2[C@@H]/C=C/[C@H](C(C)C)C)C)C</chem>                                                                    | 444                     | No               |
| 927                  | Ergosta-8(14),22-diene-3beta,5alpha,6beta,7alpha-tetraol | <chem>O[C@H]1CC[C@]2([C@@](C1)(O)[C@H](O)[C@H](C1=C3[C@@](CC[C@H]21)(C)[C@H](CC3)[C@@H]/C=C/[C@H](C(C)C)C)O)C</chem>                                                              | 444                     | No               |
| 928                  | Ergosta-7,22-diene-3beta,5alpha,6alpha-triol             | <chem>O[C@H]1CC[C@]2([C@@](C1)(O)[C@@H](O)C=C1[C@@H]2CC[C@]2([C@H]1CC[C@@H]2[C@@H]/C=C/[C@H](C(C)C)C)C)C</chem>                                                                   | 444                     | Yes              |
| 929                  | Ergosta-7,22-diene-3beta,5alpha,6beta,9alpha-tetraol     | <chem>O[C@H]1CC[C@]2([C@@](C1)(C)[C@@H](O)C=C1[C@@]2(O)CC[C@]2(C1CC[C@@H]2[C@@H]/C=C/C(C(C)C)C)C)C</chem>                                                                         | 444                     | No               |
| 930                  | 7-Prenylisatin                                           | <chem>CC(=CCc1cccc2c1NC(=O)C2=O)C</chem>                                                                                                                                          | 445                     | No               |
| 931                  | (E)-6-(4-Hydroxy-3-methylbut-2-en-1-yl)indolin-2-one     | <chem>OC/C(=C/Cc1ccc2c(c1)NC(=O)C2)/C</chem>                                                                                                                                      | 445                     | Yes              |
| 932                  | (Z)-6-(4-Hydroxy-3-methylbut-2-en-1-yl)indolin-2-one     | <chem>OC/C(=C\Cc1ccc2c(c1)NC(=O)C2)/C</chem>                                                                                                                                      | 445                     | No               |
| 933                  | Vinylamycin                                              | <chem>OCCC(C1OC(=O)C(NC(=O)C(C)NC(=O)C=CC(=C)NC1=O)C(C)C)C(CCCCC)C</chem>                                                                                                         | 446                     | Yes              |
| 934                  | Rakicidin B                                              | <chem>CC(CCCCCCCCCCCC(C1OC(=O)C(NC(=O)CN(C(=O)/C=C/C(=C)NC(=O)C1C)C)C(C(=O)N)O)C)C</chem>                                                                                         | 447                     | Yes              |
| 935                  | Rakicidin E                                              | <chem>CC(CCCCCCCCCCCC(C1OC(=O)C(NC(=O)N(C)C(=O)/C=C/C(=C)NC(=O)C1C)C(C(=O)N)O)C)C</chem>                                                                                          | 447                     | No               |
| 936                  | Rakicidin A                                              | <chem>CC(CCCCCCCCCCCC(C1OC(=O)C(NC(=O)CN(C(=O)/C=C/C(=C)NC(=O)C1C)C)C(C(=O)N)O)C)C</chem>                                                                                         | 447                     | No               |





| Comp No <sup>a</sup> | Name                                                                                                                                                        | SMILES <sup>b</sup>                                                                                                                                                                   | Cluster No <sup>c</sup> | Rep <sup>d</sup> |
|----------------------|-------------------------------------------------------------------------------------------------------------------------------------------------------------|---------------------------------------------------------------------------------------------------------------------------------------------------------------------------------------|-------------------------|------------------|
| 968                  | Oasomycin A                                                                                                                                                 | <chem>O=C1CCC(O1)CC1CC=CC(O)CC(O)C(C)C(O)C(C)C(O)CC(O)CC(O)CC(O)C(O)C=C(C(C=CC(C(C=CCCC(C(C(C(CCC=C(C(=O)O1)C)C)O)C)O)C)O)C</chem>                                                    | 466                     | Yes              |
| 969                  | Dmdm IV                                                                                                                                                     | <chem>CCC1OC(=O)/C=C/C(C)C(OC2OC(C)C(C(C2O)N(C)C)O)C(C)CC(C(=O)CC/C=C1C1COC1OC(C)C(C(C1OC)OC)O)C</chem>                                                                               | 467                     | No               |
| 970                  | Aldgamycin M                                                                                                                                                | <chem>CO[C@H]1[C@H](OC[C@H]2/C=C/CCC(=O)[C@H](C)C[C@H](C)[C@@H]([C@@H]([C@H]/C=C/C(=O)O[C@H]2C)C)O[C@@H]2O[C@H](C)C[C@H]3[C@H]2O)OC(=O)O[C@H]3C)C)O[C@@H]([C@H]([C@H]1OC)O)C</chem>   | 467                     | No               |
| 971                  | Aldgamycin L                                                                                                                                                | <chem>CO[C@H]1[C@H](OC[C@H]2/C=C/CCC(=O)[C@H](C)C[C@H](C)[C@@H]([C@@H]([C@H]/C=C/C(=O)O[C@H]2C)C)O[C@@H]2O[C@H](C)C[C@H]3[C@H]2O)O[C@@H](O)C)C)O[C@@H]([C@H]([C@H]1OC)O)C</chem>      | 467                     | No               |
| 972                  | Chalcomycin B                                                                                                                                               | <chem>CCC(=O)OC1C(OC(CC1OC)C)O[C@@H]1[C@@H](C)/C=C/C(=O)O[C@H](C)[C@@H](COC2OC(C)C(C(C2OC)OC)O)C2[C@@H](/C=C/C(=O)[C@@H](CC1C)C)O)O2</chem>                                           | 467                     | No               |
| 973                  | Aldgamycin G                                                                                                                                                | <chem>CO[C@H]1[C@H](OC[C@H]2[C@@H](C)OC(=O)/C=C/[C@H](C)C)O[C@@H]3O[C@H](C)C[C@H]4([C@H]3O)OC(=O)O[C@H]4C)[C@H](C[C@H](C(=O)/C=C/[C@H]3[C@H]2O3)C)C)O[C@@H]([C@H]([C@H]1OC)O)C</chem> | 467                     | No               |
| 974                  | Aldgamycin P                                                                                                                                                | <chem>CO[C@H]1[C@H](OCC2[C@@H](C)OC(=O)/C=C/[C@H](C)C)O[C@@H]3O[C@H](C)C[C@H]4([C@H]3O)OC(=O)O[C@H]4C)[C@H](C[C@H](C(=O)CC[C@H]3[C@H]2O3)(C)O)C)O[C@@H]([C@H]([C@H]1OC)O)C</chem>     | 467                     | No               |
| 975                  | Aldgamycin E                                                                                                                                                | <chem>CO[C@H]1[C@H](OCC2C(C)OC(=O)/C=C/C(C)C)O[C@@H]3O[C@H](C)C[C@H]4([C@H]3O)OC(=O)O[C@H]4C)C(CC(C(=O)CCC3C2O3)C)C)O[C@@H]([C@H]([C@H]1OC)O)C</chem>                                 | 467                     | No               |
| 976                  | Swalpamycin                                                                                                                                                 | <chem>CO[C@H]1[C@H](OC[C@H]2/C=C/C(=O)[C@H](C)C[C@H](C)[C@@H]([C@@H]([C@H]/C=C/C(=O)O[C@H]2C)C)O[C@@H]2O[C@H](C)CC3([C@H]2O)OC(=O)O[C@H]3C)C)O[C@@H]([C@H]([C@H]1OC)O)C</chem>        | 467                     | No               |
| 977                  | Chalcomycin E                                                                                                                                               | <chem>CO[C@H]1C[C@@H](C)O[C@H]([C@@H]1O)O[C@H]1[C@H](C)/C=C/C(=O)O[C@H](C)[C@H]/C=C/C=C/C(=O)[C@@H]([C@H]1C)C)O)CO[C@H]1O[C@H](C)[C@H]([C@H]([C@H]1OC)O)C)O</chem>                    | 467                     | No               |
| 978                  | Neutramycin E                                                                                                                                               | <chem>COC1C(OCC2C(C)OC(=O)/C=C/C(C)C(CCC(C(=O)/C=C/C3C2O3)C)OC2OC(C)CC(C2O)O)OC(C(C1OC)O)C</chem>                                                                                     | 467                     | No               |
| 979                  | Aldgamycin K                                                                                                                                                | <chem>CO[C@H]1[C@H](OC[C@H]2[C@@H](C)OC(=O)/C=C/[C@H](C)[C@@H](O[C@@H]3O[C@H](C)C[C@H]([C@H]3O)(O)[C@@H](O)C)[C@H](C[C@H](C(=O)CC[C@H]3[C@H]2O3)C)C)O[C@@H]([C@H]([C@H]1OC)O)C</chem> | 467                     | No               |
| 980                  | Aldgamycin N                                                                                                                                                | <chem>CO[C@H]1[C@H](OC[C@H]2/C=C/CCC(=O)[C@@H](C)O)C[C@@H]([C@@H]([C@H]/C=C/C(=O)O[C@H]2C)C)O[C@@H]2O[C@H](C)C[C@H]3[C@H]2O)O[C@@H](O)C)C)O[C@@H]([C@H]([C@H]1OC)O)C</chem>           | 467                     | Yes              |
| 981                  | Aldgamycin O                                                                                                                                                | <chem>CO[C@H]1[C@H](OC[C@H]2/C=C/C(=O)[C@@H](C)O)C[C@@H]([C@@H]([C@H]/C=C/C(=O)O[C@H]2C)C)O[C@@H]2O[C@H](C)C[C@H]3[C@H]2O)O[C@@H](O)C)C)O[C@@H]([C@H]([C@H]1OC)O)C</chem>             | 467                     | No               |
| 982                  | Swalpamycin B                                                                                                                                               | <chem>CO[C@H]1[C@H](OC[C@H]2/C=C/C(=O)[C@H](C)C[C@H](C)[C@@H]([C@@H]([C@H]/C=C/C(=O)O[C@H]2C)C)O[C@@H]2O[C@H](C)C[C@H]3[C@H]2O)O[C@@H](O)C)C)O[C@@H]([C@H]([C@H]1OC)O)C</chem>        | 467                     | No               |
| 983                  | Chalcomycin                                                                                                                                                 | <chem>CO[C@H]1C[C@@H](C)O[C@H]([C@@H]1O)O[C@H]1[C@H](C)/C=C/C(=O)O[C@H](C)[C@@H](CO[C@H]2O[C@H](C)[C@H]([C@H]([C@H]2OC)OC)O)[C@H]2[C@H]/C=C/C(=O)[C@@H]([C@H]1C)C)O)O2</chem>         | 467                     | No               |
| 984                  | Dihydrochalcomycin                                                                                                                                          | <chem>CO[C@H]1[C@H](C)O[C@H]([C@@H]1O)O[C@H]1[C@H](C)/C=C/C(=O)O[C@H](C)[C@H](CO[C@H]2O[C@H](C)[C@H]([C@@H]([C@H]2OC)OC)O)[C@H]2[C@@H]([C@H]([C@H]1C)C)O)O2</chem>                    | 467                     | No               |
| 985                  | Acidiscalide                                                                                                                                                | <chem>CO[C@H]1C[C@@H](C)O[C@H]([C@@H]1O)OC1C(C)/C=C/C(=O)C(C)/C=C(C(=O)C(C)O)C(C(=O)OC(C(C(C=C/C(=O)C(CC1C)C)O)O)C)C(C)O)C</chem>                                                     | 468                     | Yes              |
| 986                  | (11E,13E)-7,16-Diethyl-4,6-dihydroxy-15-[[[5-hydroxy-3,4-dimethoxy-6-methyloxan-2-yl)oxy]methyl]-5,9,13-trimethyl-1-oxacyclohexadeca-11,13-diene-2,10-dione | <chem>CCC1OC(=O)CC(O)C(C)C(O)C(CC)CC(C(=O)/C=C/C(=C/C1COC1OC(C)C(C(C1OC)OC)O)/C)C</chem>                                                                                              | 469                     | Yes              |
| 987                  | (11E,13E)-16-Ethyl-4,6,7-trihydroxy-15-[[[5-hydroxy-3,4-dimethoxy-6-methyloxan-2-yl)oxy]methyl]-5,9,13-trimethyl-1-oxacyclohexadeca-11,13-diene-2,10-dione  | <chem>CCC1OC(=O)CC(O)C(C)C(O)C(C)C(C(=O)/C=C/C(=C/C1COC1OC(C)C(C(C1OC)OC)O)/C)C</chem>                                                                                                | 469                     | No               |

[illegible]

| Comp No <sup>a</sup> | Name                     | SMILES <sup>b</sup>                                                                                                                                                                                              | Cluster No <sup>c</sup> | Rep <sup>d</sup> |
|----------------------|--------------------------|------------------------------------------------------------------------------------------------------------------------------------------------------------------------------------------------------------------|-------------------------|------------------|
| 1018                 | beta-Rubromycin          | <chem>COC(=O)c1cc2cc3CC[C@@]4(Oc3c(c2c(=O)O)O)CC1=C(O4)C(=O)c2c(C1=O)c(OC)cc(c2O)OC</chem>                                                                                                                       | 489                     | Yes              |
| 1019                 | gamma-Rubromycin         | <chem>COC(=O)c1cc2cc3CC[C@@]4(Oc3c(c2c(=O)O)O)Cc1c(O4)c(O)c2c(c1O)C(=O)C=C(C2=O)OC</chem>                                                                                                                        | 489                     | No               |
| 1020                 | Misakimycin              | <chem>COC1=CC(=O)c2c(C1=O)cc(c(c2O)C)OC</chem>                                                                                                                                                                   | 490                     | Yes              |
| 1021                 | Lactomycin B             | <chem>NCC[C@]([C@@H](C[C@H](C=C=C/[C@H]1CCC[C@H](C1)O)O)/C=C/[C@@H]1OC(=O)C=C[C@H]1CC)O</chem>                                                                                                                   | 491                     | No               |
| 1022                 | Lactomycin C             | <chem>CC[C@H]1C=CC(=O)O[C@H]1/C=C/[C@]([C@@H](C[C@H](C=C=C/[C@H]1CCC[C@H](C1)O)O)O)/O)C</chem>                                                                                                                   | 491                     | No               |
| 1023                 | Lactomycin A             | <chem>OCC[C@]([C@@H](C[C@H](C=C=C/[C@H]1CCC[C@H](C1)O)O)/C=C/[C@@H]1OC(=O)C=C[C@H]1CC)O</chem>                                                                                                                   | 491                     | Yes              |
| 1024                 | Campechic Acid B         | <chem>C[C@H](C[C@H](C=C/C(=O)[C@H](C[C@H](C[C@H](C(=O)O)C)C)/O)C)/C/C=C/[C@H](C(CC1CCC(O1)C)C1CCC(O1)C)[C@H](O)C)O)C</chem>                                                                                      | 492                     | No               |
| 1025                 | Campechic Acid A         | <chem>CCC(C(=O)/C=C/[C@H](C[C@H](C/C=C/[C@H](C(CC1CCC(O1)C)C1CCC(O1)C)[C@H](O)C)O)C)/C)/O)C[C@H](C[C@H](C[C@H](C(=O)O)C)C</chem>                                                                                 | 492                     | Yes              |
| 1026                 | Ionomycin                | <chem>C[C@H](C[C@H](C=C/C(=O)[C@H](C[C@H](C[C@H](CCC(=O)O)C)C)/O)C)/C=C/[C@H](C[C@H](C[C@H](C[C@H]1CC[C@]([O1)C)[C@H]1CC[C@]([O1)C)[C@H](O)C)O)C</chem>                                                          | 492                     | No               |
| 1027                 | Antibiotic X 14667B      | <chem>COC(C(C1OC2(CCC(O2)C)C2CCC(O2)CC)C2OC(CC2C)C2OC(O)(COC(=O)NCCc3ccccc3)C(CC2C)C)CC(C1C)O)C(C(=O)O)C</chem>                                                                                                  | 493                     | Yes              |
| 1028                 | Antibiotic X-14667A      | <chem>COC(C(C1OC2(C[C@]([O2)C)C2CC[C@]([O2)C)C2OC(CC2C)C2O[C@]([O)(COC(=O)NCCc3ccccc3)C(CC2C)C)CC(C1C)O)C)C(C(=O)O)C</chem>                                                                                      | 493                     | No               |
| 1029                 | 29-O-Methylabierixin     | <chem>COC1CC(CCC(C=C(C(=O)O)C)C)OC2(C1C)OC(CC2C)C)C1CCC(O1)C)C1OC(CC1C)C1OC(CO)OC(C(C1C)C</chem>                                                                                                                 | 494                     | No               |
| 1030                 | Abierixin                | <chem>COC[C@H]1C[C@H](C[C@H](CC[C@H](C=C(C(=O)O)C)C)O)O[C@@]2([C@H]1C)O[C@]([C@H]2C)C)C[C@H]1CC[C@]([O1)C)[C@H]1O[C@H](C[C@H]1C)[C@H]1O[C@]([O)(CO)[C@H](C[C@H]1C)C</chem>                                       | 494                     | No               |
| 1031                 | Grisorixin methyl ester  | <chem>COC(=O)[C@H]1C1OC(CC[C@H]1C)CC1C[C@H](OC)[C@H]([C@]2(O1)O[C@]([C@H]2C)C)C1CC[C@]([O1)C)C1OC(C[C@H]1C)C1O[C@]([C)O)[C@H](C[C@H]1C)C)C</chem>                                                                | 494                     | No               |
| 1032                 | Desoxynigericin          | <chem>CO[C@H]1C[C@H](C[C@H](C[C@H]2CC[C@H](C(O2)C(C(=O)O)C)O)C[C@]2([C@H]1C)OC(CC2C)C)C1CCC(O1)C)C1OC(C[C@H]1C)C1O[C@]([C)O)[C@H](C[C@H]1C)C</chem>                                                              | 494                     | No               |
| 1033                 | Grisorixin               | <chem>CO[C@H]1C[C@H](C[C@H](C[C@H]2CC[C@H](C(O2)C(C(=O)O)C)O)C[C@]2([C@H]1C)OC(CC2C)C)C1CCC(O1)C)C1O[C@H](C[C@H]1C)[C@H]1O[C@]([C)O)[C@H](C[C@H]1C)C</chem>                                                      | 494                     | No               |
| 1034                 | F-01A                    | <chem>CO[C@H]1C[C@H](C[C@H](C[C@H]2CC[C@H](C[C@H](O2)[C@H](C(=O)O)C)C)OC2([C@H]1C)O[C@]([C@H]2C)C)C[C@H]1CC[C@]([O1)C)[C@H]1O[C@H](C[C@H]1C)[C@H]1O[C@]([CO)OC)[C@H](C[C@H]1C)C</chem>                           | 494                     | No               |
| 1035                 | Nigericin                | <chem>CO[C@H]1C[C@H](C[C@H](C[C@H]2CC[C@H](C(O2)[C@H](C(=O)O)C)C)O)C[C@@]2([C@H]1C)O[C@]([C@H]2C)C)C1CC[C@]([O1)C)C1OC(C[C@H]1C)C1O[C@]([O)(CO)[C@H](C[C@H]1C)C</chem>                                           | 494                     | Yes              |
| 1036                 | Epigrisorixin            | <chem>CO[C@H]1C[C@H](C[C@H](C[C@H]2CC[C@H](C[C@H](O2)[C@H](C(=O)O)C)C)O)C[C@@]2([C@H]1C)O[C@]([C@H]2C)C)C[C@H]1CC[C@]([O1)C)[C@H]1O[C@H](C[C@H]1C)[C@H]1O[C@]([C)O)[C@H](C[C@H]1C)C</chem>                       | 494                     | No               |
| 1037                 | Octacyclomycin           | <chem>COC1CCC(OC1C)OC1CC(OC1C1C)CCC(O1)C1(C)CCC2(O1)CC(O)C(C(O2)C1OC(O)(CC(=O)O)C(C1OC)OC1CCC(C(O1)C)OC)C)C)C1OC(O)(CO)C(CC1C)C</chem>                                                                           | 495                     | Yes              |
| 1038                 | Moyukamycin              | <chem>CO[C@H]1CC[C@H](O[C@H]1C)OC[C@H]1CC[C@H](OC21O[C@H](C[C@H]2C)[C@H]1O[C@]([C)O)[C@H](C[C@H]1C)C)[C@]1(C)CCC2(O1)C[C@H](O)[C@H](C[C@H](O2)[C@H](C=C/[C(=O)C(=C/[C@H](C(=O)O)C)C)C)C</chem>                   | 496                     | No               |
| 1039                 | 3'-Hydroxydianemycin     | <chem>CC/C=C/[C(=O)C(CC(C(=O)O)C)C)C[C@]1(C)COC2(C[C@H]1O)CC[C@]([O2)C)C1C[C@H](O[C@H]2C[C@H](O)[C@H](C[C@H](O2)C)OC)[C@H](C2(O1)OC(C[C@H]2C)C1O[C@]([O)(CO)[C@H](C[C@H]1C)C)C</chem>                            | 496                     | No               |
| 1040                 | TM-531B                  | <chem>CC/C=C/[C(=O)C(CC(C(=O)O)C)C)C[C@]1(C)COC2(C[C@H]1O)CC[C@]([O2)C)C1C[C@H](O[C@H]2CC[C@H](C[C@H](O2)C)O)[C@H](C2(O1)OC(C[C@H]2C)C1O[C@]([O)(CO)[C@H](C[C@H]1C)C)C</chem>                                    | 496                     | No               |
| 1041                 | A 130C                   | <chem>CO[C@H]1CC[C@H](O[C@H]1C)O[C@H]1CC(O[C@]2([C@H]1C)CC[C@]([O2)C)C1CC[C@H](C2(O1)OC(C[C@H]2C)C1O[C@]([O)(CO)[C@H](C[C@H]1C)C)C)[C@H](C[C@H](C(=O)O)C)C)C</chem>                                              | 496                     | No               |
| 1042                 | CP 80219                 | <chem>COC1CCC(OC1C)OC1C(C)C(OC(C1C)O)CO)C1CC(C2(O1)OC(CCC2C)C1(C)CCC2(O1)CC(O)C(C(O2)C)/C=C/[C(=O)C(CC(C(=O)O)C)C)C)C)C</chem>                                                                                   | 496                     | No               |
| 1043                 | Endusamycin              | <chem>CO[C@H]1CC[C@H](O[C@H]1C)O[C@H]1C[C@]2(O[C@]1(C)[C@H]1CC[C@H](C3(O1)O[C@H](C[C@H]3C)[C@H]1O[C@]([O)(CO)[C@H](C[C@H]1C)C)C)[C@H](O)[C@H](C[C@H](O2)[C@H](C=C/[C(=O)C(=O)[C@H](C[C@H](C(=O)O)C)C)C)C</chem>  | 496                     | No               |
| 1044                 | Lenoremeycin             | <chem>CO[C@H]1CC[C@H](O[C@H]1C)O[C@H]1C[C@H](O[C@]2([C@H]1C)CC[C@]([O2)C)C)[C@H]1CC[C@H](C[C@]2(O1)O[C@H](C[C@H]2C)[C@H]1O[C@]([O)(CO)[C@H](C[C@H]1C)C)C)[C@H](C=C/[C(=O)C(=O)[C@H](C[C@H](C(=O)O)C)C)C)C</chem> | 496                     | No               |
| 1045                 | Lenoremeycin sodium salt | <chem>[Na]OC(=O)[C@H](C[C@H](C(=O)C)/C=C/[C@H](C[C@H]1C[C@H](OC2CCC(C(O2)C)OC)[C@H](C[C@]2(O1)CC[C@]([O2)C)C1CC[C@H](C[C@]2(O1)O[C@H](C[C@H]2C)[C@H]1O[C@]([O)(CO)[C@H](C[C@H]1C)C)C)C)C)C</chem>                | 496                     | No               |

| Comp No <sup>a</sup> | Name                                                                                                                                                                                                                                                                                                                                                                                                | SMILES <sup>b</sup>                                                                                                                                                                                                                            | Cluster No <sup>c</sup> | Rep <sup>d</sup> |
|----------------------|-----------------------------------------------------------------------------------------------------------------------------------------------------------------------------------------------------------------------------------------------------------------------------------------------------------------------------------------------------------------------------------------------------|------------------------------------------------------------------------------------------------------------------------------------------------------------------------------------------------------------------------------------------------|-------------------------|------------------|
| 1046                 | Leuseramycin                                                                                                                                                                                                                                                                                                                                                                                        | <chem>COC1CCC(OC1C)OC1CC(OC2(C1C)OC(CG2C)C1OC(C)(O)C(CC1C)C)C1(C)CCC2(O1)CC(O)C(C(OC2)C/C=C/C(=O)C(CC(C(=O)O)C)C)C)C</chem>                                                                                                                    | 496                     | No               |
| 1047                 | Nanchangmycin                                                                                                                                                                                                                                                                                                                                                                                       | <chem>CO[C@H]1CCC(O[C@@H]1C)O[C@H]1CC(O[C@@H]2([C@@H]1C)OC(C[C@@H]2C)C1O[C@@H](O)(CO)[C@@H](C[C@@H]1C)C[C@@H]1(C)CC(C[C@@H]2(O1)C[C@H](O)[C@H](C(O2)[C@H](C=C/C(=O)O)[C@@H](C[C@@H](C(=O)O)C)C)C)C</chem>                                      | 496                     | Yes              |
| 1048                 | Antibiotic X 14931A                                                                                                                                                                                                                                                                                                                                                                                 | <chem>OCC1(O)OC(C(CC1C)C)C1CC(C2(O1)OC(CCC2C)C1(C)CCC2(O1)CC(O)C(C(OC2)C/C=C/C(=O)C(CC(C(=O)O)C)C)C)C</chem>                                                                                                                                   | 496                     | No               |
| 1049                 | 26-Deoxylaidlomycin                                                                                                                                                                                                                                                                                                                                                                                 | <chem>CCC(=O)OC(C(C(=O)O)C)C(C1OC2(CCC(O2)(C)C2CCC(O2)(C)C2OC(CC2C)C2OC(C)(O)C(CC2C)C)CC(C1C)O)C</chem>                                                                                                                                        | 497                     | No               |
| 1050                 | Laidlomycin                                                                                                                                                                                                                                                                                                                                                                                         | <chem>CCC(=O)OC(C(C(=O)O)C)C(C1OC2(CCC(O2)(C)C2CCC(O2)(C)C2OC(CC2C)C2OC(O)(CO)C(CC2C)C)CC(C1C)O)C</chem>                                                                                                                                       | 497                     | No               |
| 1051                 | 26-Deoxymonensin B                                                                                                                                                                                                                                                                                                                                                                                  | <chem>COC(C(C1OC2(CCC(O2)(C)C2CCC(O2)(C)C2OC(CC2C)C2OC(C)(O)C(CC2C)C)CC(C1C)O)C)C(C(=O)O)C</chem>                                                                                                                                              | 497                     | Yes              |
| 1052                 | 3-O-Demethylmonensin B                                                                                                                                                                                                                                                                                                                                                                              | <chem>OC[C@]1(O)OC(C2C[C@@H](C(O2)[C@]2(C)CCC(O2)[C@]2(C)CC[C@@]3(O2)C[C@H](O)[C@H](C(O3)[C@H](C[C@@H](C(=O)O)C)C)C)[C@H](C[C@@H]1C)C</chem>                                                                                                   | 497                     | No               |
| 1053                 | Monensin                                                                                                                                                                                                                                                                                                                                                                                            | <chem>CO[C@@H]([C@H]([C@H]1O[C@@H]2CC[C@](O2)(C)[C@H]2CC[C@@](O2)(CC)[C@H]2O[C@@H](C[C@H]2C)[C@H]2O[C@@](O)(CO)[C@@H](C[C@H]2C)C)[C@@H]([C@H]1C)O)C)[C@H](C(=O)O)C</chem>                                                                      | 497                     | No               |
| 1054                 | Monensin B                                                                                                                                                                                                                                                                                                                                                                                          | <chem>COC(C(C1OC2(OCC(C2)(C)C2CCC(O2)(C)C2OC(CC2C)C2OC(O)(CO)C(CC2C)C)CC(C1C)O)C)C(C(=O)O)C</chem>                                                                                                                                             | 497                     | No               |
| 1055                 | 26-Deoxymonensin A                                                                                                                                                                                                                                                                                                                                                                                  | <chem>COC(C(C1OC2(CCC(O2)(C)C2CCC(O2)(CC)C2OC(CC2C)C2OC(C)(O)C(CC2C)C)CC(C1C)O)C)C(C(=O)O)C</chem>                                                                                                                                             | 497                     | No               |
| 1056                 | Mutalomycin                                                                                                                                                                                                                                                                                                                                                                                         | <chem>COC1C(C)C(OC(C1C)(O)C(C(=O)O)C)C(C1OC2(CCC(O2)(C)C2CCC(O2)(C)C2OC(CC2C)C2OC(C)(O)C(CC2C)C)CC(C1C)O)C</chem>                                                                                                                              | 497                     | No               |
| 1057                 | Arenaric acid                                                                                                                                                                                                                                                                                                                                                                                       | <chem>CO[C@@H]1C[C@@H](C[C@@H]2O[C@](O)([C@H](C(=O)O)O)[C@H]([C@@H]([C@@]2(C)OC)OC)C)O[C@@]2([C@@H]1C)O[C@]([C@@H]([C@H]2C)OC)(C)[C@H]1CC[C@H](O1)[C@H]1CC[C@@H](O1)[C@H]([C@H](C=C/C(=O)C)C)C)O</chem>                                        | 498                     | No               |
| 1058                 | K-41                                                                                                                                                                                                                                                                                                                                                                                                | <chem>CO[C@@H]1C[C@@H](C[C@@H]2O[C@](O)([C@H](C(=O)O)O)[C@H]([C@@H]([C@@]2(C)OC)OC)C)O[C@@]2([C@@H]1C)O[C@]([C@@H]([C@H]2C)OC)(C)[C@H]1CC[C@H](O1)[C@H]1CC[C@@H](O1)[C@H]([C@H](C(=O)O)O)[C@H]([C@@H]1C)O[C@H]1CC[C@@H]([C@H](O1)C)OC)C</chem> | 498                     | Yes              |
| 1059                 | W341C                                                                                                                                                                                                                                                                                                                                                                                               | <chem>CCO[C@H]1[C@H](OC)[C@H](C)[C@@H](O[C@]1(O)[C@H](C(=O)O)C)CC1C[C@@H](OC)[C@H]([C@]2(O1)O[C@@H](C[C@H]2C)C1O[C@@H](CC1OC1CC[C@@H]([C@H](O1)C)OC)[C@H]1CC[C@@H](O1)[C@H]1O[C@](C)(O)[C@@H](C[C@@H]1C)C)C</chem>                             | 498                     | No               |
| 1060                 | Antibiotic 6016                                                                                                                                                                                                                                                                                                                                                                                     | <chem>CO[C@@H]1C[C@@H](C[C@@H]2O[C@](O)([C@H]([C@@H]([C@@H]2C)OC)C)[C@H](C(=O)O)O)O[C@@]2([C@@H]1C)O[C@]([C@H]2C)C)[C@@H]1O[C@@H](C[C@H]1OC1CC[C@@H]([C@H](O1)C)OC)[C@H]1CC[C@@H](O1)[C@H]1O[C@](C)(O)[C@@H](C[C@@H]1C)C</chem>                | 498                     | No               |
| 1061                 | (R)-2-((2S,3S,4S,5S,6S)-6-(((2R,3R,4R,5S,7S,9R,10R)-3,9-dimethoxy-2-((2S,2'R,5R,5'R)-5'-((2S,3S,4S,5R,6S)-6-methoxy-4-(((2R,5S,6R)-5-methoxy-6-methyltetrahydro-2H-pyran-2-yl)oxy)-3,5,6-trimethyltetrahydro-2H-pyran-2-yl)octahydro-[2,2'-bifuran]-5-yl)-2,4,10-trimethyl-1,6-dioxaspiro[4.5]decan-7-yl)methyl)-2-hydroxy-4,5-dimethoxy-3,5-dimethyltetrahydro-2H-pyran-2-yl)-2-hydroxyacetic acid | <chem>CO[C@@H]1C[C@@H](C[C@@H]2O[C@](O)([C@H](C(=O)O)O)[C@H]([C@@H]([C@@]2(C)OC)OC)C)O[C@@]2([C@@H]1C)O[C@]([C@@H]([C@H]2C)OC)(C)[C@H]1CC[C@H](O1)[C@H]1CC[C@@H](O1)[C@H]([C@H](C(=O)O)O)[C@H]([C@@H]1C)O[C@H]1CC[C@@H]([C@H](O1)C)OC)C</chem> | 498                     | No               |
| 1062                 | CP 96797                                                                                                                                                                                                                                                                                                                                                                                            | <chem>COC1CC(C2OC(O)(C(C(=O)O)O)C(C2(C)OC)OC)C)OC2(C1C)OC(CC2C)(C)C1CCC(O1)C1CC(C(O1)C1OC(C)(O)C(C(C1C)OC1CCC(C(O1)C)OC)C</chem>                                                                                                               | 498                     | No               |
| 1063                 | Terrosamycin A                                                                                                                                                                                                                                                                                                                                                                                      | <chem>C[C@H]1C[C@@H](C)[C@](O[C@@H]1C[C@@]1(O)O[C@H](C[C@H]2CC[C@@H]([C@H](O2)[C@H](C(=O)O)C)C)[C@@H](C[C@@H]1C)C)(O)C[C@H]([C@H](C(=O)O)[C@@]([C@@H]1CC[C@@](O1)(C)[C@H]1CC[C@@]([C@@H](O1)C)(C)O)(O)C)O</chem>                               | 499                     | Yes              |
| 1064                 | Terrosamycin B                                                                                                                                                                                                                                                                                                                                                                                      | <chem>CO[C@]1(O)[C@H](C[C@@]2(OC)O[C@@H](C[C@H]3CC[C@@H]([C@H](O3)[C@H](C(=O)O)C)C)[C@@H](C[C@@H]2C)C)[C@H](C[C@H]1C)C)[C@H]([C@H](C(=O)O)[C@@]([C@@H]1CC[C@@](O1)(C)[C@H]1CC[C@@]([C@@H](O1)C)(C)O)(O)C)O</chem>                              | 499                     | No               |

| Comp No <sup>a</sup> | Name                                                                                                                       | SMILES <sup>b</sup>                                                                                                                                                                                                 | Cluster No <sup>c</sup> | Rep <sup>d</sup> |
|----------------------|----------------------------------------------------------------------------------------------------------------------------|---------------------------------------------------------------------------------------------------------------------------------------------------------------------------------------------------------------------|-------------------------|------------------|
| 1065                 | Emericid                                                                                                                   | <chem>CO[C@H]1CC2(CC[C@](O2)(C)C2CC[C@](O2)(C)C2OC([C@H]([C@H]2C)OC)C2O[C@](C)(O)[C@H]([C@H]([C@H]2C)OC)C)OC([C@H]1C)[C@H](C1O[C@](O)([C@H]([C@H]([C@H]1C)OC)C)[C@H](C=O)O)C</chem>                                 | 500                     | Yes              |
| 1066                 | K 41B                                                                                                                      | <chem>COC1CC(CC2OC(O)(C(C(=O)O)O)C(C2C)OC)CC)OC2(C1C)OC(C(C2C)OC1CCC(C(O1)C)OC)(C)C1CCC(O1)C1CCC(O1)C1OC(C)(O)C(C1C)OC1CCC(C(O1)C)OC</chem>                                                                         | 501                     | Yes              |
| 1067                 | Septamycin                                                                                                                 | <chem>CO[C@H]1C[C@H](C[C@H]2O[C@](O)([C@H](C=O)O)C)[C@H]([C@H]([C@H]2C)O[C@H]2CC[C@H]([C@H](O2C)OC)C)O[C@]2([C@H]1C)O[C@]([C@H]([C@H]2C)OC)(C)C1CC[C@H](O1)[C@H]1CC[C@H](O1)C1O[C@](C)(O)[C@H](C[C@H]1C)C</chem>    | 502                     | Yes              |
| 1068                 | Alborexine                                                                                                                 | <chem>CC[C@H]1O[C@H](CC[C@]1(C)O)[C@]1(C)C[C@H]([C@](O1)(O)[C@]1(C)CC[C@H](O1)[C@H]([C@]1(O)O)[C@H](C[C@]2(O)O)[C@H](CC[C@H]2C)[C@H]([C@H](C[C@H]2O[C@H]([C@H](C[C@H]2C)C)[C@H](C=O)O)O)C)[C@H](C[C@H]1C)O)C</chem> | 503                     | Yes              |
| 1069                 | Duocarmycin Sa                                                                                                             | <chem>COc1cc2cc([nH]c2c(c1OC)OC)C(=O)N1CC2[C@]3(C=CC(=O)c1c3cc([nH]1)C(=O)OC)C2</chem>                                                                                                                              | 504                     | Yes              |
| 1070                 | Chlorizidine A                                                                                                             | <chem>Clc1cc2n(c1Cl)C(=O)c1c2cc(O)c(c1O)[C@H]1CCc2n1c(Cl)c(c2)Cl</chem>                                                                                                                                             | 505                     | Yes              |
| 1071                 | Actinofuranone B                                                                                                           | <chem>C/C=C/C([C@H])(C=C/C(C=CC/C=C/C1=C(C)C(=O)C(O1)(C)O)C)O)C</chem>                                                                                                                                              | 506                     | No               |
| 1072                 | E-875                                                                                                                      | <chem>CC=C(C(C(C=CC=C(CCC(CC1=C(C)C(=O)C(O1)(C)O)O)C)O)C</chem>                                                                                                                                                     | 506                     | No               |
| 1073                 | SCHEMBL14571373                                                                                                            | <chem>C/C=C/C(C(C=C/C(C=CC(CC1=C(C)C(=O)C(O1)(C)O)O)C)O)C</chem>                                                                                                                                                    | 506                     | No               |
| 1074                 | Actinofuranone A                                                                                                           | <chem>C/C=C/C([C@H]([C@H])(C=C/C(C=CC[C@H](CC1=C(C)C(=O)C(O1)(C)O)O)C)O)C</chem>                                                                                                                                    | 506                     | No               |
| 1075                 | 5-[(5E,7E,11E)-2,10-Dihydroxy-9,11-dimethyl-5,7,11-tridecatrien-1-yl]-2-hydroxy-2-(1-hydroxyethyl)-4-methyl-3(2H)-furanone | <chem>C/C=C/C(C(C=C/C(C=CC(CC1=C(C)C(=O)C(O1)(O)C(O)O)C)O)C</chem>                                                                                                                                                  | 506                     | No               |
| 1076                 | Actinofuranone E                                                                                                           | <chem>CCC(C=C/C([C@H]([C@H])(C=C/C(C=CC[C@H](CC1=C(C)C(=O)C(O1)(O)C(O)O)C)O)C)O</chem>                                                                                                                              | 506                     | No               |
| 1077                 | Actinofuranone I                                                                                                           | <chem>CC/C=C/C(C(C=C/C(C=CC[C@H](CC1=C(C)C(=O)C(O1)(O)C(O)O)O)C)O)C</chem>                                                                                                                                          | 506                     | No               |
| 1078                 | Actinofuranone D                                                                                                           | <chem>CCC(C=C/C([C@H]([C@H])(C=C/C(C=CC[C@H](CC1=C(C)C(=O)C(O1)(O)C(O)O)C)O)C)O</chem>                                                                                                                              | 506                     | No               |
| 1079                 | Actinofuranone H                                                                                                           | <chem>CC/C=C/C([C@H]([C@H])(C=C/C(C=CC[C@H](CC1=C(C)C(=O)C(O1)(O)C(O)O)C)O)C</chem>                                                                                                                                 | 506                     | No               |
| 1080                 | E-492                                                                                                                      | <chem>OC(CC1=C(C)C(=O)C(O1)(O)C(O)C)CCC=CC=CC(C(C=C)O)C</chem>                                                                                                                                                      | 506                     | Yes              |
| 1081                 | E-975                                                                                                                      | <chem>CC/C=C/C(C(C=C/C(C=CC(CC1=C(C)C(=O)C(O1)(O)C(O)O)C)O)C</chem>                                                                                                                                                 | 506                     | No               |
| 1082                 | Actinofuranone F                                                                                                           | <chem>CC(C/C=C/C([C@H]([C@H])(C=C/C(C=CC[C@H](CC1=C(C)C(=O)C(O1)(O)C(O)O)C)O)C)O</chem>                                                                                                                             | 506                     | No               |
| 1083                 | JBIR-108                                                                                                                   | <chem>CCC(C=C/C([C@H]([C@H])(C=C/C(C=CC[C@H](CC1=C(C)C(=O)C(O1)(O)C(O)O)C)O)C</chem>                                                                                                                                | 506                     | No               |
| 1084                 | Salinomycin                                                                                                                | <chem>CC[C@H]([C@H]1O[C@]2(C=C[C@H]([C@]3(O2)CC[C@](O3)(C)[C@H]2CC[C@]([C@H](O2)C)(O)CC)O)[C@H](C[C@H]1C)C(=O)[C@H]([C@H]([C@H]([C@H]1O[C@H](CC[C@H]1C)[C@H](C=O)O)CC)O)C</chem>                                    | 507                     | Yes              |
| 1085                 | Deoxy(O-8)-salinomycin                                                                                                     | <chem>CC[C@H]([C@H]1O[C@]2(C=CC[C@]3(O2)CC[C@](O3)(C)[C@H]2CC[C@]([C@H](O2)C)(O)CC)[C@H](C[C@H]1C)C(=O)[C@H]([C@H]([C@H]([C@H]1O[C@H](CC[C@H]1C)[C@H](C=O)O)CC)O)C</chem>                                           | 508                     | Yes              |
| 1086                 | 17-Epi-deoxy(O-8)-salinomycin                                                                                              | <chem>CC[C@H]([C@H]1O[C@]2(C=CCC3(O2)CC[C@](O3)(C)[C@H]2CC[C@]([C@H](O2)C)(O)CC)[C@H](C[C@H]1C)C(=O)[C@H]([C@H]([C@H]([C@H]1O[C@H](CC[C@H]1C)C(C(=O)O)CC)O)C</chem>                                                 | 508                     | No               |
| 1087                 | Ferensimycin A                                                                                                             | <chem>CCC(C(=O)C(C(C1OC(O)(C(CC1C)C)C(=O)O)C)O)C1OC(CC1C)(C)C1(O)OC(CC1C)(CC)C(O)C</chem>                                                                                                                           | 509                     | Yes              |
| 1088                 | Inostamycin                                                                                                                | <chem>CCC[C@H]([C@]1(CC)C[C@H]([C@](O1)(O)[C@]1(C)C[C@H](C(O1)[C@H](C=O)[C@H]([C@H]([C@H](C1O[C@](O)([C@H]([C@H]1CC)O)C)[C@H](C(=O)O)CC)C)O)CC)C)O</chem>                                                           | 509                     | No               |
| 1089                 | Noboritomycin B                                                                                                            | <chem>CCOC(=O)C1OC(C[C@H]1O)C1(C)OC2(C([C@H]1OC)C)OC1(C=CC2O)O[C@H]([C@H](C[C@H]1C)C)C(C(=O)[C@H](C[C@H]CC(c1ccc(c1C(=O)O)O)CC)C)O)C</chem>                                                                         | 510                     | Yes              |
| 1090                 | 6-Chloronoboritomycin                                                                                                      | <chem>CCOC(=O)[C@H]1O[C@H](C[C@H]1O)[C@]1(C)O[C@]2([C@H]([C@H]1OC)C)O[C@]1(C=C[C@H]2O)O[C@H]([C@H](C[C@H]1C)C)[C@H](C(=O)[C@H]([C@H]([C@H]([C@H]1C)C(C(=O)O)CC)C)O)C</chem>                                         | 510                     | No               |
| 1091                 | Antibiotic X-14766A                                                                                                        | <chem>CCOC(=O)C1OC(C[C@H]1O)[C@]1(C)OC2([C@H]([C@H]1OC)C)O[C@]1(C=C[C@H]2O)OC([C@H](C[C@H]1C)C)[C@H](C(=O)[C@H]([C@H]([C@H]([C@H]1C)C(C(=O)O)O)C)C</chem>                                                           | 511                     | No               |
| 1092                 | Noboritomycin                                                                                                              | <chem>CCOC(=O)[C@H]1O[C@H](C[C@H]1O)[C@]1(C)O[C@]2([C@H]([C@H]1OC)C)O[C@]1(C=C[C@H]2O)O[C@H]([C@H](C[C@H]1C)C)[C@H](C(=O)[C@H]([C@H]([C@H]([C@H]1C)C(C(=O)O)O)CC)C)O)C</chem>                                       | 511                     | Yes              |

| Comp No <sup>a</sup> | Name                                                                                                                                                                                              | SMILES <sup>b</sup>                                                                                                                                                                                                                                                                                                                          | Cluster No <sup>c</sup> | Rep <sup>d</sup> |
|----------------------|---------------------------------------------------------------------------------------------------------------------------------------------------------------------------------------------------|----------------------------------------------------------------------------------------------------------------------------------------------------------------------------------------------------------------------------------------------------------------------------------------------------------------------------------------------|-------------------------|------------------|
| 1093                 | Noboritomycin A                                                                                                                                                                                   | CCOC(=O)C1OC(C[C@H]1O)C1(C)OC2(C[C@H]1OC)C)OC1(C=CC2O)O[C@H]([C@H](C[C@H]1C)C)C(C(=O)[C@H](C[C@H](C[C@H](CC(c1ccc(c(c1C(=O)O)O)C)C)O)C)C                                                                                                                                                                                                     | 511                     | No               |
| 1094                 | Sekgranaticin                                                                                                                                                                                     | OC(=O)C[C@H]1O[C@H](C)[C@H]23[C@H]([C@H]1Oc1c2c(=O)oc(c1)Cc1cccc2c1c(=O)c c(=O)C)C(=O)c1c(C3=O)c(O)c2c(c1O)[C@H]1C[C@H]([C@H]2O)[C@H](O1)C)O                                                                                                                                                                                                 | 512                     | Yes              |
| 1095                 | MC 033                                                                                                                                                                                            | O[C@H]1C[C@H](O[C@H]2CCCC3C2C=CC2[C@H]3(C)C(=O)OC3=C(O)C4(OC3=O)C[C@H](C)C(=CC4/C=C\CCCC2)C(=O)O)[C@H]([C@H]1O[C@H]1C[C@H](O)[C@H]([C@H](O1)C)OC(=O)c1c(O)ccc(c1C)Cl)C                                                                                                                                                                       | 513                     | No               |
| 1096                 | MC 032                                                                                                                                                                                            | OC1[C@H](O[C@H]2CCCC3C2C=CC2[C@H]3(C)C(=O)OC3=C(O)C4(OC3=O)C[C@H](C)C(=C C4/C=C\CCCC2)C(=O)O)[C@H]([C@H]([C@H]1O)O[C@H]1C[C@H](OC(=O)c2c(O)ccc(c2 C)Cl)[C@H]([C@H](O1)C)O)C                                                                                                                                                                  | 513                     | No               |
| 1097                 | MC-031                                                                                                                                                                                            | O[C@H]1C[C@H](O[C@H]2CCCC3C2C=CC2[C@H]3(C)C(=O)OC3=C(O)C4(OC3=O)C[C@H](C)C(=CC4/C=C\CCCC2)C(=O)O)[C@H]([C@H]1O[C@H]1C[C@H](OC(=O)c2c(O)ccc(c2C)Cl)[ C@H]([C@H](O1)C)O)C                                                                                                                                                                      | 513                     | Yes              |
| 1098                 | MC 034                                                                                                                                                                                            | OC1[C@H](O[C@H]2CCCC3C2C=CC2[C@H]3(C)C(=O)OC3=C(O)C4(OC3=O)C[C@H](C)C(=C C4/C=C\CCCC2)C(=O)O)[C@H]([C@H]([C@H]1O)O[C@H]1C[C@H](O)[C@H]([C@H](O1)C)OC(=O)c1c(O)ccc(c1C)Cl)C                                                                                                                                                                   | 513                     | No               |
| 1099                 | Chlorothricin                                                                                                                                                                                     | COc1ccc(c(c1C(=O)O)[C@H]1C[C@H](O[C@H]2[C@H](O)C[C@H](O[C@H]2C)O[C@H]2CC C[C@H]3[C@H]2C=C[C@H]2[C@H]3(C)C(=O)OC3=C(O)[C@H]4(OC3=O)C[C@H](C)C(=C[ C@H]4/C=C\CCCC2)C(=O)O)[C@H]([C@H]1O)C)Cl                                                                                                                                                   | 513                     | No               |
| 1100                 | Streptanibin B                                                                                                                                                                                    | O=C1C=C(c2cccc2)C2=NC(OC2=C1c1cccc1)(C)C                                                                                                                                                                                                                                                                                                     | 514                     | Yes              |
| 1101                 | Phosphatidylinositolma nnoside                                                                                                                                                                    | CCCCCCCCCCCCCCCC(=O)O[C@H](COP(=O)(OC1C(OC2O[C@H](CO)[C@H]([C@H]([C@H] H2O)O)O)C(O)C(C1OC1O[C@H](CO)[C@H]([C@H]([C@H]1O)O)O)O)COC(=O)CCCC CCCCC(CCCCCCCC)C                                                                                                                                                                                   | 515                     | Yes              |
| 1102                 | Rha-Rha-C10-C10                                                                                                                                                                                   | CCCCCCCC(OC1OC(C)[C@H]([C@H]([C@H]1OC1OC(C)[C@H]([C@H]([C@H]1O)O) O)O)CC(=O)OC(CC(=O)O)CCCCCCC                                                                                                                                                                                                                                               | 516                     | Yes              |
| 1103                 | Astolide A                                                                                                                                                                                        | CC[C@H]([C@H]([C@H]([C@H]([C@H]([C@H]([C@H]([C@H]1OC(=O)C=CCC(O)CC(O)CCCC(O) CCC(C)[C@H](O)C(=O)[C@H]2O[C@H](C[C@H](C[C@H](C[C@H](CCCC(C=C[C@H]1C)O)O )O)O)C[C@H](O)[C@H]2O)C)O)C)O)[C@H]1O[C@H](C)[C@H]([C@H]([C@H](C1)C)O)O[C @H]1CC[C@H]([C@H](O1)C)OC(=O)[C@H]([C@H]([C@H]([C@H]([C@H]([C@H]([C@H]([C@H] H1CC[C@H]([C@H](O1)C)O)C        | 517                     | Yes              |
| 1104                 | Astolide B                                                                                                                                                                                        | CC[C@H]([C@H]([C@H]([C@H]([C@H]([C@H]([C@H]([C@H]1OC(=O)C=CCC(O)CC(O)CCCC(O)C CC(C)[C@H](O)C(=O)[C@H]2O[C@H](C[C@H](C[C@H](C[C@H](CCCC(C=C[C@H]1C)O) O)O)O)C[C@H](O)[C@H]2O)C)O)C)O)[C@H]1O[C@H](C)[C@H]([C@H]([C@H](C1)C)O)O[C@H] 1C[C@H](O)[C@H]([C@H]([C@H](O1)C)OC(=O)[C@H]([C@H]([C@H]([C@H]([C@H]([C@H]([C@H] H1CC[C@H]([C@H](O1)C)O)C | 518                     | Yes              |
| 1105                 | PM100117                                                                                                                                                                                          | CCC(C(C(C(C(C1OC(=O)C=CCC(O)CC(O)CCCC(O)CCC(C)C)O)C(=O)C2(OC(CC(CC(CC(CCCC (C=CC1C)O)O)O)CC(O)C2)O)C)O)C)OC1OC(C)C(C(C1)C)O)OC1CC(O)C(C(O1)C)OC(=O) C(C(c1ccc2c(c1)C(=O)C=C(C2=O)C)OC1CCC(C(O1)C)O)C                                                                                                                                         | 519                     | Yes              |
| 1106                 | PM100118                                                                                                                                                                                          | CCC(C(C(C(C(C1OC(=O)C=CCC(O)CC(O)CCCC(O)CCC(C)C)O)C(=O)C2(OC(CC(CC(CC(CCCC (C=CC1C)O)O)O)CC(O)C2)O)C)O)C)OC1OC(C)C(C(C1)C)O)OC1CCC(C(O1)C)OC(=O)C(C (c1ccc2c(c1)C(=O)C=C(C2=O)C)OC1CCC(C(O1)C)O)C                                                                                                                                            | 520                     | Yes              |
| 1107                 | Fattiviracin A1                                                                                                                                                                                   | OCC1OC(OC(CCCCCCCCCCCCCC(O)C)CCCCCCCCCCCCC2CC(=O)OCC3OC(OC(CC(=O )O)CC4OC(O2)C(O)C(C4O)O)CCCCCCCCCCCCC(OC2OC(CO)C(C(C2O)O)O)CCCCC(O)C)C(C( C3O)O)O)C(C(C1O)O)O                                                                                                                                                                               | 521                     | Yes              |
| 1108                 | Fattiviracin FV-8                                                                                                                                                                                 | OC[C@H]1O[C@H](OC(CCCCC(C)O)CCCCCCCCCCCCC2CC(=O)OCC3OC(OC(CC(=O)OCC 4OC(O2)[C@H](O)[C@H]([C@H]4O)O)CCCCCCCCCCCC(O)[C@H]2O[C@H](CO)[C@H]([C @H]([C@H]2O)O)O)CCCCC(O)C)[C@H]([C@H]([C@H]([C@H]3O)O)O)[C@H]([C@H]([C@H]1 O)O)O                                                                                                                  | 522                     | Yes              |
| 1109                 | Antibiotic T 23IX                                                                                                                                                                                 | CCCCC(=O)N[C@H](CO[C@H]1C/C=C/C=C/C[C@H](OC)CC(=O)Nc2c(c(C)C=C(C\C@H]([ C@H]1C)O)C)cc(O)c2)O)C                                                                                                                                                                                                                                               | 523                     | No               |
| 1110                 | D-Alanine, N-(2-methyl-1-oxopropyl)-, (5R,6E,8E,10E,13S,14 R,15R,16Z)-15,22,24-trihydroxy-5-methoxy-14,16-dimethyl-3-oxo-2-azabicyclo[18.3.1]tetrac osa-1(24),6,8,10,16,20,22-heptaen-13-yl ester | CO[C@H]1/C=C/C=C/C/C[C@H](OC(=O)[C@H](NC(=O)C(C)C)[C@H](C)[C@H](/C(=C/CCc2 c(c(NC(=O)C1)cc(O)c2)O)/C)O                                                                                                                                                                                                                                       | 523                     | No               |
| 1111                 | D-Alanine, N-(3-methyl-1-oxobutyl)-, (5R,6E,8E,10E,13S,14 R,15R,16Z)-15,22,24-trihydroxy-5-methoxy-                                                                                               | CO[C@H]1/C=C/C=C/C/C[C@H](OC(=O)[C@H](NC(=O)CC(C)C)[C@H](C)[C@H](/C(=C/CC c2c(c(NC(=O)C1)cc(O)c2)O)/C)O                                                                                                                                                                                                                                      | 523                     | No               |

| Comp No <sup>a</sup> | Name                                                                                                                                                                                                                              | SMILES <sup>b</sup>                                                                                                       | Cluster No <sup>c</sup> | Rep <sup>d</sup> |
|----------------------|-----------------------------------------------------------------------------------------------------------------------------------------------------------------------------------------------------------------------------------|---------------------------------------------------------------------------------------------------------------------------|-------------------------|------------------|
|                      | 14,16-dimethyl-3-oxo-2-azabicyclo[18.3.1]tetraosa-1(24),6,8,10,16,20,22-heptaen-13-yl ester                                                                                                                                       |                                                                                                                           |                         |                  |
| 1112                 | Mycotrienin II                                                                                                                                                                                                                    | <chem>CO[C@H]1/C=C/C=C/C=C/C[C@H](OC(=O)[C@H](NC(=O)C2CCCCC2)C)[C@@H](C)[C@H](/C(=C/Cc2c(c(NC(=O)C1)cc(O)c2)O)/C)O</chem> | 523                     | No               |
| 1113                 | Cytotrienin A                                                                                                                                                                                                                     | <chem>CO[C@H]1/C=C/C=C/C=C/C[C@H](OC(=O)C2(CC2)NC(=O)C2=CCCCC2)[C@H](C)[C@H](/C(=C/Cc2c(c(NC(=O)C1)cc(O)c2)O)/C)O</chem>  | 523                     | No               |
| 1114                 | Ansatrienin B                                                                                                                                                                                                                     | <chem>CO[C@H]1/C=C/C=C/C=C/C[C@H](OC(=O)[C@H](NC(=O)C2CCCCC2)C)[C@H](C)[C@H](/C(=C/Cc2c(c(NC(=O)C1)cc(O)c2)O)/C)O</chem>  | 523                     | No               |
| 1115                 | Trienomycin D                                                                                                                                                                                                                     | <chem>COC1/C=C/C=C/C=C/C[C@H](OC(=O)C(NC(=O)C2=CCCCC2)C)C(C)/C(=C/Cc2cc(NC(=O)C1)cc(c2)O)/C)O</chem>                      | 523                     | No               |
| 1116                 | D-Alanine, N-(2-methyl-1-oxopropyl)-, (5R,6E,8E,10E,13S,14R,15R,16Z)-15,22-dihydroxy-5-methoxy-14,16-dimethyl-3-oxo-2-azabicyclo[18.3.1]tetraosa-1(24),6,8,10,16,20,22-heptaen-13-yl ester                                        | <chem>CO[C@H]1/C=C/C=C/C=C/C[C@H](OC(=O)[C@H](NC(=O)C(C)C)C)[C@@H](C)[C@H](/C(=C/CCc2cc(NC(=O)C1)cc(c2)O)/C)O</chem>      | 523                     | No               |
| 1117                 | Trienomycin B                                                                                                                                                                                                                     | <chem>CO[C@H]1/C=C/C=C/C=C/C[C@H](OC(=O)[C@H](NC(=O)CC(C)C)C)[C@H](C)[C@H](/C(=C/CCc2cc(NC(=O)C1)cc(c2)O)/C)O</chem>      | 523                     | No               |
| 1118                 | Trienomycin K                                                                                                                                                                                                                     | <chem>CCCC(=O)N[C@H](C(=O)O[C@H]1CC=CC=CC=C[C@H](OC)CC(=O)Nc2cc(CCC=C([C@H]1)C)cc(O)c2)C</chem>                           | 523                     | No               |
| 1119                 | Trienomycin A                                                                                                                                                                                                                     | <chem>COC1/C=C/C=C/C=C/C[C@H](OC(=O)C(NC(=O)C2CCCCC2)C)C(C)/C(=C/CCc2cc(NC(=O)C1)cc(c2)O)/C)O</chem>                      | 523                     | No               |
| 1120                 | Thiazinotrienomycin E                                                                                                                                                                                                             | <chem>COC1/C=C/C=C/C=C/C[C@H](OC(=O)C(NC(=O)C2CCCCC2)C)C(C)/C(=C/CCc2c(c(NC(=O)C1)cc1NC(=O)CSc21)O)/C)O</chem>            | 523                     | No               |
| 1121                 | Benzoxazomycin                                                                                                                                                                                                                    | <chem>COC1CC(=O)N2C1C1/C=C/C=C/C[C@H](OC(=O)C(NC(=O)C3CCCCC3)C)C(C)/C(=C/CCc3c(O1)c2cc(c3)O)/C)O</chem>                   | 523                     | No               |
| 1122                 | D-Alanine, N-(2-methyl-1-oxopropyl)-, (3R,3aS,4S,16S,17R,18R)-2,3,3a,4-tetrahydro-8,18-dihydroxy-3-methoxy-17,19-dimethyl-1-oxo-4,6-[1,3,9]dodecatieno-1H-pyrrolo[2,1-c][1,4]benzoxazin-16-yl ester                               | <chem>COC1CC(=O)N2C1C1/C=C/C=C/C[C@H](OC(=O)C(NC(=O)C(C)C)C)C(C)/C(=C/CCc3c(O1)c2cc(c3)O)/C)O</chem>                      | 523                     | No               |
| 1123                 | D-Alanine, N-(3-methyl-1-oxobutyl)-, (1R,12Z,14R,15R,16S,18E,20E,22S,22aS)-2,3,10,11,14,15,16,17,22,22a-decahydro-7,14-dihydroxy-1-methoxy-13,15-dimethyl-3-oxo-1H-22,5,9-(epoxymethyno)pyrrolo[1,2-a]azacycloeicosin-16-yl ester | <chem>COC1CC(=O)N2C1C1/C=C/C=C/C[C@H](OC(=O)C(NC(=O)CC(C)C)C)C(C)/C(=C/CCc3c(O1)c2cc(c3)O)/C)O</chem>                     | 523                     | Yes              |
| 1124                 | D-Alanine, N-(4-methyl-1-oxopentyl)-, (1R,12Z,14R,15R,16S,18E,20E,22S,22aS)-2,3,10,11,14,15,16,17,22,22a-decahydro-7,14-dihydroxy-1-methoxy-                                                                                      | <chem>COC1CC(=O)N2C1C1/C=C/C=C/C[C@H](OC(=O)C(NC(=O)CCC(C)C)C)C(C)/C(=C/CCc3c(O1)c2cc(c3)O)/C)O</chem>                    | 523                     | No               |



| Comp No <sup>a</sup> | Name                                                                                                                                                                                    | SMILES <sup>b</sup>                                                                                                                                      | Cluster No <sup>c</sup> | Rep <sup>d</sup> |
|----------------------|-----------------------------------------------------------------------------------------------------------------------------------------------------------------------------------------|----------------------------------------------------------------------------------------------------------------------------------------------------------|-------------------------|------------------|
|                      | 13,15-dimethyl-3-oxo-1H-22,5,9-(epoxymethyno)pyrrolo[1,2-a]azacycloeicosin-16-yl ester                                                                                                  |                                                                                                                                                          |                         |                  |
| 1125                 | Trienomycin E                                                                                                                                                                           | <chem>CO[C@H]1/C=C/C=C/C=C/[C@H](OC(=O)[C@H](NC(=O)CCC(C)C)[C@@H](C)[C@H]/C(=C/Cc2cc(NC(=O)C1)cc(c2)O)/C)O</chem>                                        | 523                     | No               |
| 1126                 | Quinotrierixin                                                                                                                                                                          | <chem>COC1/C=C/C=C/C=C/CC(OC(=O)C(NC(=O)C2CCCC2)C)C(C)C/C(=C\CCC2=C(C(=O)C=C(NC(=O)C1)C2=O)SC)/C)O</chem>                                                | 524                     | Yes              |
| 1127                 | Trienomycin L                                                                                                                                                                           | <chem>CO[C@H]1C=CC=CC=C[C@H](O)[C@H](C)[C@H](C=CCCc2cc(NC(=O)C1)cc(c2)O)C)OC(=O)[C@H](NC(=O)CC(C)C)C</chem>                                              | 525                     | Yes              |
| 1128                 | Trienomycin G                                                                                                                                                                           | <chem>COC1/C=C/C=C/C=CC(O)C(C)C/C(=C\CCc2cc(NC(=O)C1)cc(c2)O)/C)OC(=O)[C@H](NC(=O)C1CCCC1)C</chem>                                                       | 525                     | No               |
| 1129                 | Ansatrienin A3                                                                                                                                                                          | <chem>COC1/C=C/C=C/C=C/CC(OC(=O)C(NC(=O)CC(C)C)C)C(C)C/C(=C\CCC2=CC(=O)C=C(NC(=O)C1)C2=O)/C)O</chem>                                                     | 526                     | No               |
| 1130                 | Antibiotic T 23VIII                                                                                                                                                                     | <chem>CO[C@H]1/C=C/C=C/C=C/C[C@H](OC(=O)[C@H](NC(=O)CCC(C)C)[C@@H](C)[C@H]/C(=C/C\CCC2=CC(=O)C=C(NC(=O)C1)C2=O)/C)O</chem>                               | 526                     | No               |
| 1131                 | D-Alanine, N-(2-methyl-1-oxopropyl)-, (5R,6E,8E,10E,13S,14R,15R,16Z)-15-hydroxy-5-methoxy-14,16-dimethyl-3,22,24-trioxo-2-azabicyclo[18.3.1]tetraosa-6,8,10,16,20,23-hexaen-13-yl ester | <chem>CO[C@H]1/C=C/C=C/C=C/C[C@H](OC(=O)[C@H](NC(=O)C(C)C)[C@@H](C)[C@H]/C(=C/CCC2=CC(=O)C=C(NC(=O)C1)C2=O)/C)O</chem>                                   | 526                     | No               |
| 1132                 | Ansatrienin A                                                                                                                                                                           | <chem>COC1/C=C/C=C/C=C\CC(OC(=O)[C@H](NC(=O)C2CCCC2)C)C(C)C/C(=C\CCC2=CC(=O)C=C(NC(=O)C1)C2=O)/C)O</chem>                                                | 526                     | Yes              |
| 1133                 | Mycotrienin I                                                                                                                                                                           | <chem>CO[C@H]1/C=C/C=C/C=C/C[C@H](OC(=O)[C@H](NC(=O)C2CCCC2)C)[C@@H](C)[C@H]/C(=C/CCC2=CC(=O)C=C(NC(=O)C1)C2=O)/C)O</chem>                               | 526                     | No               |
| 1134                 | Mycotrienol I                                                                                                                                                                           | <chem>CO[C@H]1/C=C/C=C/C=C/C[C@H](O)[C@H](C)[C@@H](C)/C(=C/CCC2=CC(=O)C=C(NC(=O)C1)C2=O)/C)O</chem>                                                      | 527                     | Yes              |
| 1135                 | Isolauryl 5-hydroxyanthranilate                                                                                                                                                         | <chem>CC(CCCCCCCCOC(=O)c1cc(O)ccc1N)C</chem>                                                                                                             | 528                     | No               |
| 1136                 | Isodecyl 5-hydroxyanthranilate                                                                                                                                                          | <chem>CC(CCCCCCOC(=O)c1cc(O)ccc1N)C</chem>                                                                                                               | 528                     | No               |
| 1137                 | Isoundecyl 5-hydroxyanthranilate                                                                                                                                                        | <chem>CC(CCCCCCCCOC(=O)c1cc(O)ccc1N)C</chem>                                                                                                             | 528                     | Yes              |
| 1138                 | Protylonolide                                                                                                                                                                           | <chem>CC[C@H]1OC(=O)C[C@@H](O)[C@H](C)[C@@H](O)[C@@H](CC)C[C@H](C(=O)/C=C/C(=C/[C@@H]1C)/C)C</chem>                                                      | 529                     | Yes              |
| 1139                 | Pironetin                                                                                                                                                                               | <chem>C/C=C/C[C@H]([C@H]([C@H]([C@@H](C[C@H]1OC(=O)C=C[C@H]1CC)O)C)OC)C</chem>                                                                           | 530                     | Yes              |
| 1140                 | Prejadomycin 2-carboxylate                                                                                                                                                              | <chem>OC(=O)C1=C(C)CC2(C(C1=O)c1cc3cccc(c3c(c1C(=O)C2)O)O)O</chem>                                                                                       | 531                     | Yes              |
| 1141                 | 2,3-Dehydro-UWM6                                                                                                                                                                        | <chem>CC1=CC(=O)[C@H]2[C@](C1)(O)CC(=O)c1c2cc2cccc(c2c1O)O</chem>                                                                                        | 531                     | No               |
| 1142                 | Rishirilide C                                                                                                                                                                           | <chem>CC(CC[C@@]1(O)c2cc3c(O)cccc3c(c2C(=O)[C@@H]([C@]1(O)C(=O)O)C)O)C</chem>                                                                            | 532                     | Yes              |
| 1143                 | Eurystatin B                                                                                                                                                                            | <chem>CCC(CC/C=C/C(=O)NC1CCCN(C(=O)C(NC(=O)C(=O)C(NC1=O)C)CC(C)C)C</chem>                                                                                | 533                     | Yes              |
| 1144                 | YM-51084                                                                                                                                                                                | <chem>O=CC(NC(=O)[C@H](C(C)C)NC(=O)[C@H](Cc1ccc(cc1)O)NC(=O)CC(C)C)Cc1ccccc1</chem>                                                                      | 534                     | Yes              |
| 1145                 | YM-51085                                                                                                                                                                                | <chem>OCC(NC(=O)[C@H](C(C)C)NC(=O)[C@H](Cc1ccc(cc1)O)NC(=O)CC(C)C)Cc1ccccc1</chem>                                                                       | 534                     | No               |
| 1146                 | Cystargamide B                                                                                                                                                                          | <chem>CCCCCCCC1OC1C(=O)N[C@@H]1[C@H](C)OC(=O)[C@@H](NC(=O)[C@H](NC(=O)[C@H](NC(=O)[C@H](NC1=O)Cc1ccccc1)CCC(=O)O)Cc1c[nH]c2c1cc(O)cc2)c1ccc(cc1)O</chem> | 535                     | Yes              |
| 1147                 | Bottromycin C2                                                                                                                                                                          | <chem>COC(=O)CC(c1nccs1)NC(=O)C(C(c1cccc1)C)NC(=O)C/N=C/C1C(C)C(CN1C(=O)C(C(C)C)NC(=O)C(C(C)C)C)NC(=O)/C=C/C(C)C)C)N</chem>                              | 536                     | Yes              |
| 1148                 | Bottromycin B2                                                                                                                                                                          | <chem>COC(=O)CC(c1nccs1)NC(=O)C(C(c1cccc1)C)NC(=O)C/N=C/C1CCCN1C(=O)C(C(C)C)NC(=O)C(C(C)C)C)NC(=O)/C=C/C(C)C)C)N</chem>                                  | 536                     | No               |
| 1149                 | Ahpatinin C                                                                                                                                                                             | <chem>CC(C[C@@H]([C@H](CC(=O)N[C@H](C(=O)N[C@H]([C@H](CC(=O)O)O)CC(C)C)O)NC(=O)[C@H](C(C)C)NC(=O)[C@H](C(C)C)NC(=O)CC(C)C)C</chem>                       | 537                     | No               |
| 1150                 | Ahpatinin (I)Bu                                                                                                                                                                         | <chem>CC(C[C@H]([C@@H](CC(=O)N[C@@H](C(=O)N[C@@H]([C@@H](CC(=O)O)O)Cc1ccccc1)C)O)NC(=O)[C@@H](C(C)C)NC(=O)[C@@H](C(C)C)NC(=O)C(C)C)C</chem>              | 537                     | Yes              |
| 1151                 | YF-044P-D                                                                                                                                                                               | <chem>OC(=O)CC(C(NC(=O)C(NC(=O)CC(C(NC(=O)C(C(C)C)NC(=O)C(C(C)C)NC(=O)Cc1ccccc1)Cc1cccc1)O)C)Cc1ccccc1)O</chem>                                          | 537                     | No               |

[illegible]

| Comp No <sup>a</sup> | Name                | SMILES <sup>b</sup>                                                                                                                                                                                                                                                                             | Cluster No <sup>c</sup> | Rep <sup>d</sup> |
|----------------------|---------------------|-------------------------------------------------------------------------------------------------------------------------------------------------------------------------------------------------------------------------------------------------------------------------------------------------|-------------------------|------------------|
| 1182                 | Naphthomycin N      | <chem>O[C@H]1/C=C/[C@H](C)[C@H](O)[C@H](C)/C=C(C)/C(=O)c2c3C(=O)C(=C(C(=O)c3cc(c2O)C)NC(=O)/C=C/C=C/C=C/[C@H]([C@H](CC(=O)/C=C(C1)/C)O)C)/C)NCCSC1=C2NC(=O)/C=C/C=C/C=C/[C@H](C)[C@H](O)CC(=O)/C=C/C[C@H]([C@H](C)/C=C/[C@H]([C@H]([C@H](C)/C=C(C(=O)c3c(C1=O)c(C2=O)cc(c3O)C)C)O)C)O)/C</chem> | 554                     | Yes              |
| 1183                 | Naphthomycin O      | <chem>O[C@H]1/C=C/[C@H](C)[C@H](O)[C@H](C)/C=C(C)/C(=O)c2c3C(=O)C4=C(C(=O)c3cc(c2O)C)NC(=O)C/C=C/C(=O)/C=C/[C@H]([C@H](CC(=O)/C=C(C1)/C)O)C)/S4C</chem>                                                                                                                                         | 555                     | Yes              |
| 1184                 | Diastovaricin II    | <chem>O[C@H]1/C=C/[C@H](C)[C@H](O)[C@H](C)/C=C(C)/C(=O)c2c3C(=O)C(=C(C(=O)c3cc(c2O)C)NC(=O)/C=C/C=C/C=C/[C@H]([C@H](CC(=O)/C=C(C1)/C)O)C)SC[C@H](C(=O)O)NC(=O)C</chem>                                                                                                                          | 556                     | Yes              |
| 1185                 | Naphthomycin M      | <chem>OC(=O)CSC1=C2NC(=O)/C=C/C=C/C=C/[C@H](C)[C@H](O)CC(=O)/C=C/C[C@H]([C@H](C)/C=C/[C@H]([C@H]([C@H](C)/C=C(C(=O)c3c(C1=O)c(C2=O)cc(c3O)C)C)O)C)O)/C</chem>                                                                                                                                   | 556                     | No               |
| 1186                 | Naphthomycin P      | <chem>O[C@H]1/C=C/[C@H](C)[C@H](O)[C@H](C)/C=C(C)/C(=O)c2c3C(=O)C(=C(C(=O)c3cc(c2O)C)NC(=O)/C=C/C=C/C=C/[C@H]([C@H]([C@H](CC(=O)/C=C(C1)/C)O)C)O)C)O)/C</chem>                                                                                                                                  | 557                     | Yes              |
| 1187                 | Naphthomycin L      | <chem>O[C@H]1/C=C/[C@H](C)[C@H](O)[C@H](C)/C=C(C)/C(=O)c2c3C(=O)C(=C(C(=O)c3cc(c2O)C)NC(=O)/C=C/C=C/C=C/[C@H]([C@H](CC(=O)/C=C(C1)/C)O)C)/C)N</chem>                                                                                                                                            | 558                     | Yes              |
| 1188                 | Naphthomycin E      | <chem>O[C@H]1/C=C/[C@H](C)[C@H](O)[C@H](C)/C=C(C)/C(=O)c2c3C(=O)C(=C(C(=O)c3cc(c2O)C)NC(=O)/C=C/C=C/C=C/[C@H]([C@H](CC(=O)/C=C(C1)/C)O)C)/C</chem>                                                                                                                                              | 559                     | Yes              |
| 1189                 | Naphthoquinomycin A | <chem>COC1=C2NC(=O)/C=C/C=C/C=C/C(C)C(C)O)CC(=O)/C=C/CC/C=C/C(C/C=C(C(=O)c3c(C1=O)c(C2=O)cc(c3O)C)/C)C)O)O)/C</chem>                                                                                                                                                                            | 560                     | Yes              |
| 1190                 | Naphthomycin A      | <chem>O[C@H]1/C=C/[C@H](C)[C@H](O)[C@H](C)/C=C(C)/C(=O)c2c3C(=O)C(=C(C(=O)c3cc(c2O)C)NC(=O)/C=C/C=C/C=C/[C@H]([C@H](CC(=O)/C=C(C1)/C)O)C)/C)Cl</chem>                                                                                                                                           | 561                     | Yes              |
| 1191                 | Naphthomycin Q      | <chem>O[C@H]1/C=C/[C@H](C)[C@H](O)[C@H](C)/C=C(C)/C(=O)c2c3C(=O)C(=C(C(=O)c3cc(c2O)C)NC(=O)/C=C/C=C/C=C/[C@H](C)/C=C/C(=O)/C=C(C1)/C)C)/C)Cl</chem>                                                                                                                                             | 561                     | No               |
| 1192                 | Naphthoquinomycin B | <chem>CSC1=C2NC(=O)/C=C/C=C/C=C/C(C)C(C)O)CC(=O)/C=C/CC/C=C/C(C/C=C(C(=O)c3c(C1=O)c(C2=O)cc(c3O)C)/C)C)O)O)/C</chem>                                                                                                                                                                            | 562                     | Yes              |
| 1193                 | Pyridomycin         | <chem>CC/C=C(C1OC(=O)C)C(C)O)C(NC(=O)C(C(OC1=O)C)NC(=O)c1ncccc1O)Cc1ccccc1)/C</chem>                                                                                                                                                                                                            | 563                     | Yes              |
| 1194                 | Erizomycin          | <chem>CC/C=C(C1OC(=O)[C@H](C)[C@H](O)[C@H](NC(=O)[C@H]([C@H](OC1=O)C)NC(=O)c1ncccc1O)Cc1ccccc1)/C</chem>                                                                                                                                                                                        | 563                     | No               |
| 1195                 | Kitamycin C         | <chem>CCCCC[C@H]1C(=O)O[C@H](C)[C@H](C(=O)O[C@H]([C@H]1O)C)NC(=O)c1cccc(c1O)NC=O</chem>                                                                                                                                                                                                         | 564                     | No               |
| 1196                 | Urauchmycin B       | <chem>O=CNC1cccc(c1O)C(=O)N[C@H]1C(=O)O[C@H](C)[C@H]([C@H](C(=O)O[C@H]1C)CCC(C)C)O</chem>                                                                                                                                                                                                       | 564                     | No               |
| 1197                 | Kitamycin A         | <chem>CCCCCC[C@H]1C(=O)O[C@H](C)[C@H](C(=O)O[C@H]([C@H]1O)C)NC(=O)c1cccc(c1O)NC=O</chem>                                                                                                                                                                                                        | 564                     | No               |
| 1198                 | Kitamycin B         | <chem>O=CNC1cccc(c1O)C(=O)N[C@H]1C(=O)O[C@H](C)[C@H]([C@H](C(=O)O[C@H]1C)CCCC(C)C)O</chem>                                                                                                                                                                                                      | 564                     | No               |
| 1199                 | Antimycin A19       | <chem>CCCCC[C@H]1C(=O)O[C@H](C)[C@H](C(=O)O[C@H]([C@H]1OC(=O)[C@H](C(C)C)C)C)NC(=O)c1cccc(c1O)NC=O</chem>                                                                                                                                                                                       | 564                     | No               |
| 1200                 | Urauchimycin B      | <chem>O=CNC1cccc(c1O)C(=O)NC1C(=O)OC(C)C(C(C(=O)OC1C)CCC(C)C)O</chem>                                                                                                                                                                                                                           | 564                     | No               |
| 1201                 | Urauchimycin A      | <chem>O=CNC1cccc(c1O)C(=O)NC1C(=O)OC(C)C(C(C(=O)OC1C)CC(C)C)O</chem>                                                                                                                                                                                                                            | 564                     | No               |
| 1202                 | Antimycin A4b       | <chem>CCCC[C@H]1C(=O)O[C@H](C)[C@H](C(=O)O[C@H]([C@H]1OC(=O)CCC)C)NC(=O)c1cccc(c1O)NC=O</chem>                                                                                                                                                                                                  | 564                     | No               |
| 1203                 | Antimycin A17       | <chem>CCCCCC1C(=O)OC(C)C(C(=O)OC(C1OC(=O)C(C)C)C)NC(=O)c1cccc(c1O)NC=O</chem>                                                                                                                                                                                                                   | 564                     | No               |
| 1204                 | 5-Fluoroantimycin   | <chem>CCCCCC[C@H]1[C@H](OC(=O)C(C)C)[C@H](C)OC(=O)[C@H]([C@H](C1=O)C)NC(=O)c1cc(F)cc(c1O)NC=O</chem>                                                                                                                                                                                            | 564                     | No               |
| 1205                 | Antimycin A2        | <chem>CCCC(=O)OC1C(C)OC(=O)C(C(OC(=O)C1CCCCC)C)NC(=O)c1cccc(c1O)NC=O</chem>                                                                                                                                                                                                                     | 564                     | No               |
| 1206                 | UNII-3471OQ4074     | <chem>CCCC[C@H]1C(=O)O[C@H](C)[C@H](C(=O)O[C@H]([C@H]1OC(=O)C(C)C)C)NC(=O)c1cccc(c1O)NC=O</chem>                                                                                                                                                                                                | 564                     | No               |
| 1207                 | Antimycin A6a       | <chem>O=CNC1cccc(c1O)C(=O)N[C@H]1C(=O)O[C@H](C)[C@H]([C@H](C(=O)O[C@H]1C)CC(C)C)O</chem>                                                                                                                                                                                                        | 564                     | No               |
| 1208                 | Antimycin A4        | <chem>CCCCC1C(=O)OC(C)C(C(=O)OC(C1OC(=O)CCC)C)NC(=O)c1cccc(c1O)NC=O</chem>                                                                                                                                                                                                                      | 564                     | No               |
| 1209                 | UNII-745M0KNN2Y     | <chem>CCCCCC[C@H]1C(=O)O[C@H](C)[C@H](C(=O)O[C@H]([C@H]1OC(=O)C(C)C)C)NC(=O)c1cc(cc1O)NC=O</chem>                                                                                                                                                                                               | 564                     | No               |
| 1210                 | Antimycin A8        | <chem>O=CNC1cccc(c1O)C(=O)N[C@H]1C(=O)O[C@H](C)[C@H]([C@H](C(=O)O[C@H]1C)CCC(C)C)OC(=O)C(C)C</chem>                                                                                                                                                                                             | 564                     | Yes              |
| 1211                 | UNII-DPA68075PF     | <chem>O=CNC1cccc(c1O)C(=O)N[C@H]1C(=O)O[C@H](C)[C@H]([C@H](C(=O)O[C@H]1C)CCC(C)C)OC(=O)C(C)C</chem>                                                                                                                                                                                             | 564                     | No               |
| 1212                 | Antimycin A9        | <chem>CCCCC1C(=O)OC(C)C(C(=O)OC(C1OC(=O)Cc1cccc1)C)NC(=O)c1cccc(c1O)NC=O</chem>                                                                                                                                                                                                                 | 564                     | No               |
| 1213                 | Antimycin A1a       | <chem>CCCCCC[C@H]1C(=O)O[C@H](C)[C@H](C(=O)O[C@H]([C@H]1OC(=O)[C@H](CC)C)C)NC(=O)c1cccc(c1O)NC=O</chem>                                                                                                                                                                                         | 564                     | No               |
| 1214                 | Antimycin A18       | <chem>CCCC[C@H]1[C@H](COC(=O)[C@H]([C@H](OC1=O)C)NC(=O)c1cccc(c1O)NC=O)OC(=O)C</chem>                                                                                                                                                                                                           | 564                     | No               |



| Comp No <sup>a</sup> | Name                                                 | SMILES <sup>b</sup>                                                                                                                                 | Cluster No <sup>c</sup> | Rep <sup>d</sup> |
|----------------------|------------------------------------------------------|-----------------------------------------------------------------------------------------------------------------------------------------------------|-------------------------|------------------|
| 1239                 | 15-Hydroxygeldanamycin                               | <chem>CO[C@H]1C[C@H](C)[C@@H](O)C2=C(OC)C(=O)C=C(C2=O)NC(=O)/C(=C/C=C/[C@@H]([C@H](/C(=C/[C@@H]([C@H]1O)C)/C)OC(=O)N)OC)/C</chem>                   | 572                     | No               |
| 1240                 | CHEMBL340169                                         | <chem>CO[C@H]1C[C@H](C)CC2=C(OC)C(=O)C=C(C2=O)NC(=O)/C(=C/CC[C@@H]([C@H](/C(=C/[C@@H]([C@H]1O)C)/C)OC(=O)N)OC)/C</chem>                             | 572                     | Yes              |
| 1241                 | CHEMBL2087236                                        | <chem>CO[C@H]1C[C@H](C)CC2=C(OC)C(=O)C=C(C2=O)NC(=O)/C(=C/[C@@H](C[C@@H]([C@H](/C(=C/[C@@H]([C@H]1O)C)/C)OC(=O)N)OC)/C</chem>                       | 572                     | No               |
| 1242                 | CHEMBL2087235                                        | <chem>CO[C@H]1C[C@H](C)CC2=C(OC)C(=O)C=C(C2=O)NC(=O)/C(=C/[C@H](C[C@@H]([C@H](/C(=C/[C@@H]([C@H]1O)C)/C)OC(=O)N)OC)/C</chem>                        | 572                     | No               |
| 1243                 | KOSN-1633                                            | <chem>CO[C@H]1C[C@H](C)C2O[C@@H]1[C@@H](C)/C=C(\C)/[C@H](OC(=O)N)[C@@H](OC)/C=C/C=C(\C(=O)NC1=CC(=O)C(=C2C1=O)OC)/C</chem>                          | 573                     | Yes              |
| 1244                 | Geldanamycin B                                       | <chem>CO[C@H]1C[C@H](C)CC2=C(OC)C(=O)C(=O)C(=C2O)NC(=O)/C(=C/C=C/[C@@H]([C@H](/C(=C/[C@@H]([C@H]1O)C)/C)OC(=O)N)OC)/C</chem>                        | 574                     | Yes              |
| 1245                 | 19-Hydroxy-4,5-dihydrogeldanamycin                   | <chem>CO[C@H]1C[C@H](C)CC2=C(OC)C(=O)C(=C(C2=O)NC(=O)/C(=C/CC[C@@H]([C@H](/C(=C/[C@@H]([C@H]1O)C)/C)OC(=O)N)OC)/C</chem>                            | 574                     | No               |
| 1246                 | Geldanamycin D                                       | <chem>CO[C@H]1C[C@H](C)CC2=C(OC)C(=O)C(=O)C(=C2O)NC(=O)/C(=C/[C@@H](C[C@@H]([C@H](/C(=C/[C@@H]([C@H]1O)C)/C)OC(=O)N)OC)/C</chem>                    | 575                     | Yes              |
| 1247                 | SCHEMBL141220                                        | <chem>CO[C@H]1C[C@H](C)CC2=C(OC)C(=O)C=C(C2=O)NC(=O)/C(=C/C=C/[C@@H]([C@H](/C(=C/[C@@H]([C@H]1O)C)/C)OC(=O)N)C)/C</chem>                            | 576                     | Yes              |
| 1248                 | Herbimycin B                                         | <chem>COC1CC(C)CC2=CC(=O)C=C(C2=O)NC(=O)/C(=C/C=C/C(C(=C\C(C1O)C)/C)OC(=O)N)OC)/C</chem>                                                            | 577                     | Yes              |
| 1249                 | SCHEMBL10035841                                      | <chem>CO[C@H]1C[C@H](C)CC2=C(CO)C(=O)C=C(C2=O)NC(=O)/C(=C/C=C/[C@@H]([C@H](/C(=C/[C@@H]([C@H]1O)C)/C)OC(=O)N)OC)/C</chem>                           | 578                     | Yes              |
| 1250                 | Herbimycin C                                         | <chem>CO[C@@H]1C[C@H](C)[C@@H](OC)C2=CC(=O)C=C(C2=O)NC(=O)/C(=C/C=C/[C@H]([C@@H](/C(=C/[C@H]([C@@H]1O)C)/C)OC(=O)N)OC)/C</chem>                     | 578                     | No               |
| 1251                 | Herbimycin A                                         | <chem>CO[C@@H]1[C@@H](C)/C=C(\C)/[C@H](OC(=O)N)[C@@H](OC)/C=C\C=C(\C(=O)NC2=CC(=O)C=C([C@@H]([C@H](C[C@@H]1OC)C)OC)C2=O)/C</chem>                   | 579                     | Yes              |
| 1252                 | CHEMBL2419114                                        | <chem>CO[C@@H]1[C@@H](C)/C=C(\C)/[C@H](OC(=O)N)[C@H](OC)/C=C\C=C(\C(=O)NC2=C(C(=CC(=O)C2=O)[C@@H]([C@H](C[C@@H]1OC)C)OC)O)/C</chem>                 | 580                     | Yes              |
| 1253                 | 19-S-Methylgeldanamycin                              | <chem>CO[C@H]1C[C@H](C)CC2=C(OC)C(=O)C(=C(C2=O)NC(=O)/C(=C/C=C/[C@@H]([C@H](/C(=C/[C@@H]([C@H]1O)C)/C)OC(=O)N)OC)/SC</chem>                         | 581                     | Yes              |
| 1254                 | CHEMBL2375649                                        | <chem>CO[C@H]1C[C@H](C)CC2=C(OC)C(=O)C(=C(C2=O)NC(=O)/C(=C/CC[C@@H]([C@H](/C(=C/[C@@H]([C@H]1O)C)/C)OC(=O)N)OC)/C[C@@H](C(=O)C[C@H](O)C)OC</chem>   | 582                     | Yes              |
| 1255                 | CHEMBL2375650                                        | <chem>CO[C@H]1C[C@H](C)CC2=C(OC)C(=O)C(=C(C2=O)NC(=O)/C(=C/C=C/[C@@H]([C@H](/C(=C/[C@@H]([C@H]1O)C)/C)OC(=O)N)OC)/C[C@@H](C(=O)C[C@H](O)C)OC</chem> | 583                     | Yes              |
| 1256                 | Herbimycin                                           | <chem>CO[C@@H]1[C@@H](C)/C=C(\C)/[C@H](OC(=O)N)[C@H](OC)/C=C/C=C(/C(=O)NC2=CC(=O)C=C([C@@H]([C@H](C[C@@H]1OC)C)OC)C2=O)/C</chem>                    | 584                     | Yes              |
| 1257                 | Hexanedioic acid, dioctyl ester                      | <chem>CCCCCCCCOC(=O)CCCCC(=O)OCCCCCCCC</chem>                                                                                                       | 585                     | Yes              |
| 1258                 | Di(2-propylpentyl) ester                             | <chem>CCCC(COC(=O)CCCC(=O)OCC(CCC)CCC)CCC</chem>                                                                                                    | 586                     | Yes              |
| 1259                 | Octadecanoic acid, 2-hydroxy-1,3-propanediyl ester   | <chem>CCCCCCCCCCCCCCCCC(=O)OCC(COC(=O)CCCCCCCCCCCCCCCC)O</chem>                                                                                     | 587                     | Yes              |
| 1260                 | A Factor                                             | <chem>OC[C@@H]1COC(=O)C1C(=O)CCCC(C)C</chem>                                                                                                        | 588                     | No               |
| 1261                 | AC1L35AK                                             | <chem>OCC1COC(=O)C1C(CCCCC(C)C)O</chem>                                                                                                             | 588                     | No               |
| 1262                 | Factor I                                             | <chem>OC[C@@H]1COC(=O)[C@H]1C(CCCCC(C)C)O</chem>                                                                                                    | 588                     | No               |
| 1263                 | SCB7                                                 | <chem>CCCCCCCC[C@H]([C@H]1[C@H](CO)COC1=O)O</chem>                                                                                                  | 588                     | No               |
| 1264                 | SCB3                                                 | <chem>CCC(CCCC[C@H]([C@H]1[C@H](CO)COC1=O)O)C</chem>                                                                                                | 588                     | Yes              |
| 1265                 | Virginiamycin butanolide D                           | <chem>CCCCCCC(C1C(CO)COC1=O)O</chem>                                                                                                                | 588                     | No               |
| 1266                 | SCB1                                                 | <chem>OC[C@@H]1COC(=O)[C@H]1[C@@H](CCCC(C)C)O</chem>                                                                                                | 588                     | No               |
| 1267                 | SCB2                                                 | <chem>CCCCCCCC[C@H]([C@H]1[C@H](CO)COC1=O)O</chem>                                                                                                  | 588                     | No               |
| 1268                 | SCB6                                                 | <chem>CCCCCCC[C@H]([C@H]1[C@H](CO)COC1=O)O</chem>                                                                                                   | 588                     | No               |
| 1269                 | CHEMBL2419113                                        | <chem>CO[C@@H]1[C@@H](C)/C=C(\C)/[C@H](OC(=O)N)[C@@H](OC)/C=C\C=C(\C(=O)Nc2c(c([C@@H]([C@H](C[C@@H]1OC)C)OC)cc1NC(=O)CSc21)O)/C</chem>              | 589                     | Yes              |
| 1270                 | Dihydro-herbimycin A                                 | <chem>CO[C@@H]1[C@@H](C)/C=C(\C)/[C@H](OC(=O)N)[C@@H](OC)/C=C\C=C(\C(=O)Nc2c(c([C@@H]([C@H](C[C@@H]1OC)C)OC)cc(O)c2)O)/C</chem>                     | 590                     | Yes              |
| 1271                 | 17-Formyl-17-demethoxy-18-O,21-O-dihydrogeldanamycin | <chem>CO[C@H]1C[C@H](C)Cc2c(O)c(NC(=O)/C(=C/C=C/[C@@H]([C@H](/C(=C/[C@@H]([C@H]1O)C)/C)OC(=O)N)OC)/C)cc(c2C=O)O</chem>                              | 590                     | No               |

| Comp No <sup>a</sup> | Name                                                      | SMILES <sup>b</sup>                                                                                                                       | Cluster No <sup>c</sup> | Rep <sup>d</sup> |
|----------------------|-----------------------------------------------------------|-------------------------------------------------------------------------------------------------------------------------------------------|-------------------------|------------------|
| 1272                 | 4,5-Dehydro-17-de-O-methyl-reblastatin                    | <chem>CO[C@H]1C[C@@H](C)Cc2c(O)c(NC(=O)/C(=C/C=C/[C@H]([C@@H]/C(=C/[C@H]([C@H]1O)C)/C)OC(=O)N)OC)/C)cc(c2O)O</chem>                       | 590                     | No               |
| 1273                 | 18-Acetamido-17-de-O-methyl-21-hydroxyreblastatin         | <chem>CO[C@H]1C[C@@H](C)Cc2c(O)c(NC(=O)/C(=C/CC[C@H]([C@@H]/C(=C/[C@H]([C@H]1O)C)/C)OC(=O)N)OC)/C)cc(c2O)NC(=O)C</chem>                   | 590                     | No               |
| 1274                 | 18-Dehydroxy-17-demethoxy-21-fluororeblastatin            | <chem>CO[C@H]1C[C@@H](C)Cc2cccc(c2F)NC(=O)/C(=C/CC[C@H]([C@@H]/C(=C/[C@H]([C@H]1O)C)/C)OC(=O)N)OC)/C</chem>                               | 591                     | Yes              |
| 1275                 | WK-88-1                                                   | <chem>CO[C@H]1CC\C=C(C)\C(=O)Nc2cccc(C[C@H](C)C[C@H](OC)[C@H](O)[C@@H](C)\C=C(C)\C[C@@H]1OC(N)=O)c2</chem>                                | 592                     | Yes              |
| 1276                 | 17-Demethoxy-18-ethynylreblastatin                        | <chem>CO[C@H]1C[C@@H](C)Cc2cc(cc(c2)C#C)NC(=O)/C(=C/CC[C@H]([C@@H]/C(=C/[C@H]([C@H]1O)C)/C)OC(=O)N)OC)/C</chem>                           | 592                     | No               |
| 1277                 | 18-Dehydroxy-17-de-O-methyl-21-fluororeblastatin          | <chem>CO[C@H]1C[C@@H](C)Cc2c(O)ccc(c2F)NC(=O)/C(=C/CC[C@H]([C@@H]/C(=C/[C@H]([C@H]1O)C)/C)OC(=O)N)OC)/C</chem>                            | 593                     | No               |
| 1278                 | 17-Demethoxy-18-prop-2-ynylreblastatin                    | <chem>C#CCc1cc2cc(c1)C[C@H](C)C[C@H](OC)[C@H](O)[C@@H](C)/C=C/[C@H]([C@@H]/CC/C=C/C(=O)N2)/C)OC(=O)N)C</chem>                             | 593                     | No               |
| 1279                 | CHEMBL401784                                              | <chem>CO[C@H]1C[C@@H](C)Cc2cc(NC(=O)/C(=C/CC[C@H]([C@@H]/C(=C/[C@H]([C@H]1O)C)/C)OC(=O)N)OC)/C)cc(c2O)O</chem>                            | 593                     | No               |
| 1280                 | 18-Amino-4,5-dehydro-17-demethylreblastatin               | <chem>CO[C@H]1C[C@@H](C)Cc2cc(NC(=O)/C(=C/C=C/[C@H]([C@@H]/C(=C/[C@H]([C@H]1O)C)/C)OC(=O)N)OC)/C)cc(c2O)N</chem>                          | 593                     | No               |
| 1281                 | 17-de-O-Methyl-18-ethynylreblastatin                      | <chem>CO[C@H]1C[C@@H](C)Cc2cc(NC(=O)/C(=C/CC[C@H]([C@@H]/C(=C/[C@H]([C@H]1O)C)/C)OC(=O)N)OC)/C)cc(c2O)C#C</chem>                          | 593                     | Yes              |
| 1282                 | 4,5-Dehydro-17-demethoxy-18-prop-2-ynylreblastatin        | <chem>C#CCc1cc2NC(=O)/C(=C/C=C/[C@H]([C@@H]/C(=C/[C@H]([C@H]([C@H]([C@H]1O)C)C)C)C)OC(=O)N)OC)/C)OC(=O)N)C</chem>                         | 593                     | No               |
| 1283                 | 17-de-O-Methyl-18-prop-2-ynylreblastatin                  | <chem>C#CCc1cc2NC(=O)/C(=C/CC[C@H]([C@@H]/C(=C/[C@H]([C@H]([C@H]([C@H]1O)C)C)C)C)OC(=O)N)OC)/C)OC(=O)N)C</chem>                           | 593                     | No               |
| 1284                 | 18-Acetamido 4,5-dehydro-17-de-O-methylreblastatin        | <chem>CO[C@H]1C[C@@H](C)Cc2cc(NC(=O)/C(=C/C=C/[C@H]([C@@H]/C(=C/[C@H]([C@H]1O)C)/C)OC(=O)N)OC)/C)cc(c2O)NC(=O)C</chem>                    | 593                     | No               |
| 1285                 | Thiazinogeldanamycin                                      | <chem>CO[C@@H]1C[C@@H](C)Cc2c(O)c(NC(=O)C(=CC=C[C@H]([C@@H](C(=C[C@H]([C@H]1O)C)C)OC(=O)N)OC)C)c1c(c2OC)NC(=O)CS1</chem>                  | 594                     | Yes              |
| 1286                 | 4,5-Dihydrothiazinogeldanamycin                           | <chem>CO[C@H]1C[C@@H](C)Cc2c(O)c(NC(=O)C(=C/CC[C@H]([C@@H]/C(=C/[C@H]([C@H]1O)C)/C)OC(=O)N)OC)/C)c1c(c2OC)NC(=O)CS1</chem>                | 595                     | Yes              |
| 1287                 | Geldanamycin G                                            | <chem>CO[C@H]([C@@H]([C@H]([C@H]/C=C/[C@H]([C@H]/C(=C/C=C(\C(=O)O)/C)OC)OC(=O)N)C)O)C[C@@H](Cc1c(O)c(NC(=O)CO)c2c(c1OC)NC(=O)CS2)C</chem> | 596                     | Yes              |
| 1288                 | Reblastatin                                               | <chem>CO[C@H]1C[C@@H](C)Cc2cc(NC(=O)/C(=C/CC[C@H]([C@@H]/C(=C/[C@H]([C@H]1O)C)/C)OC(=O)N)OC)/C)cc(c2OC)O</chem>                           | 597                     | No               |
| 1289                 | Progeldanamycin                                           | <chem>CO[C@H]1C[C@@H](C)Cc2cc(O)cc(c2)NC(=O)/C(=C/CC[C@H]([C@@H]/C(=C/C([C@H]1O)C)/C)O)OC)/C</chem>                                       | 597                     | Yes              |
| 1290                 | SCHEMBL13009061                                           | <chem>CO[C@H]1C[C@@H](C)Cc2cc(O)cc(c2)NC(=O)/C(=C/CC[C@H]([C@@H]/C(=C/[C@H]([C@H]1O)C)/C)O)OC)/C</chem>                                   | 597                     | No               |
| 1291                 | Geldanamycin E                                            | <chem>CO[C@H]1C[C@@H](C)Cc2c(OC(=O)CO)c(NC(=O)/C(=C/C=C/[C@H]([C@@H]/C(=C/[C@H]([C@H]1O)C)/C)OC(=O)N)OC)/C)cc(c2OC)O</chem>               | 598                     | Yes              |
| 1292                 | 18,21-Didehydro-18,21-dideoxo-18,21-dihydroxygeldanamycin | <chem>CO[C@H]1C[C@@H](C)Cc2c(O)c(NC(=O)C(=CC=C[C@H]([C@@H](C(=C[C@H]([C@H]1O)C)C)O)C(=O)N)OC)C)cc(c2OC)O</chem>                           | 599                     | Yes              |
| 1293                 | Streptoglyceride B                                        | <chem>C/C=C/C=C/C/[C@]12OCC[C@H]3[C@@H]2[C@](CO1)(O)CO3</chem>                                                                            | 600                     | Yes              |
| 1294                 | Streptoglyceride A                                        | <chem>C/C=C/C=C/CC[C@]12OCC[C@H]3[C@@H]2[C@](CO1)(O)CO3</chem>                                                                            | 600                     | No               |
| 1295                 | Piericidin B1 N-oxide                                     | <chem>C/C=C(\[C@H]([C@H]/C=C(\C=C/C/C=C/Cc1n(O)c(OC)c(c(=O)c1C)OC)/C)/C)OC)/C</chem>                                                      | 601                     | No               |
| 1296                 | Piericidin E1                                             | <chem>C/C=C([C@H]([C@@H]/C=C/C(=C/CC1(C)OC1Cc1[nH]c(OC)cc(=O)c1C)\C)C)O)\C</chem>                                                         | 601                     | No               |
| 1297                 | Piericidin B1                                             | <chem>C/C=C([C@H]([C@@H]/C=C/C(=C/C/C(=C/Cc1[nH]c(OC)c(c(=O)c1C)OC)/C)\C)C)OC)\C</chem>                                                   | 601                     | No               |
| 1298                 | Piericidin B5                                             | <chem>CC/C=C([C@H]([C@@H]/C=C/C(=C/C/C(=C/Cc1[nH]c(OC)c(c(=O)c1C)OC)/C)\C)C)OC)\C</chem>                                                  | 601                     | No               |
| 1299                 | Piericidin F                                              | <chem>CO[C@@H]/C(=C/C)/C[C@@H]/C=C/C(=C/C/C(=C/Cc1[nH]c(OC)cc(=O)c1C)/C)\C)C</chem>                                                       | 601                     | No               |
| 1300                 | Mer-A2026B                                                | <chem>C/C=C/C(C)/C(=C/C(=C/C/C(=C/Cc1[nH]c(OC)cc(=O)c1C)/C)\C)C)O)\C</chem>                                                               | 601                     | No               |
| 1301                 | Piericidin A5                                             | <chem>CC/C=C([C@H]([C@@H]/C=C/C(=C/C/C(=C/Cc1[nH]c(OC)c(c(=O)c1C)OC)/C)\C)C)O)\C</chem>                                                   | 601                     | No               |
| 1302                 | Piericidin A                                              | <chem>C/C=C([C@H]([C@@H]/C=C/C(=C/C/C(=C/Cc1[nH]c(OC)c(c(=O)c1C)OC)/C)\C)C)O)\C</chem>                                                    | 601                     | Yes              |

| Comp No <sup>a</sup> | Name                                                                                                                                          | SMILES <sup>b</sup>                                                                                                                                                                                                                                    | Cluster No <sup>c</sup> | Rep <sup>d</sup> |
|----------------------|-----------------------------------------------------------------------------------------------------------------------------------------------|--------------------------------------------------------------------------------------------------------------------------------------------------------------------------------------------------------------------------------------------------------|-------------------------|------------------|
| 1303                 | Demethylpericidin A1                                                                                                                          | <chem>C/C=C/[C@@H](C/C=C/C(=C/Cc1[nH]c(OC)c(c=O)c1C)OC)/C)\C)O)\C</chem>                                                                                                                                                                               | 601                     | No               |
| 1304                 | 7-Demethylpericidin A1                                                                                                                        | <chem>C/C=C/[C@@H]([C@@H](C/C=C/C(=C/Cc1[nH]c(OC)c(c=O)c1C)OC)/C)\C)O)\C</chem>                                                                                                                                                                        | 601                     | No               |
| 1305                 | Piericidin C7                                                                                                                                 | <chem>C/C=C/[C@@H]1O[C@@]1(C)[C@@H]([C@@H](C/C=C/C(=C/Cc1[nH]c(OC)c(c=O)c1C)OC)/C)\C)O)\C</chem>                                                                                                                                                       | 601                     | No               |
| 1306                 | Piericidin C3                                                                                                                                 | <chem>COc1[nH]c(C/C=C/C(=C/C(C2C)OC2C(C)C)O)/C)\C)c(c=O)c1OC)C</chem>                                                                                                                                                                                  | 601                     | No               |
| 1307                 | Piericidin C1                                                                                                                                 | <chem>COc1[nH]c(C/C=C/C(=C/C(C2C)OC2C(C)C)O)/C)\C)c(c=O)c1OC)C</chem>                                                                                                                                                                                  | 601                     | No               |
| 1308                 | Piericidin G                                                                                                                                  | <chem>COC(C1(C)OC1C)C/C=C/C(=C/Cc1[nH]c(OC)c(c=O)c1C)OC)/C)\C)C</chem>                                                                                                                                                                                 | 601                     | No               |
| 1309                 | Piericidin C8                                                                                                                                 | <chem>C/C=C/[C@@H]1O[C@@]1(C)[C@@H]([C@@H](C/C=C/C(=C/Cc1[nH]c(OC)c(c=O)c1C)O)/C)\C)O)\C</chem>                                                                                                                                                        | 601                     | No               |
| 1310                 | 2-((2E,5E,7E,9R,10R)-10-((2S,3S)-2,3-Dimethyloxiran-2-yl)-10-hydroxy-3,7,9-trimethyldeca-2,5,7-trien-1-yl)-5,6-dimethoxy-3-methylpyridin-4-ol | <chem>COc1[nH]c(C/C=C/C(=C/C(C@H)([C@H]([C@]2(C)O[C@H]2C)O)/C)\C)c(c=O)c1OC)C</chem>                                                                                                                                                                   | 601                     | No               |
| 1311                 | CHEBI:69899                                                                                                                                   | <chem>C/C=C/[C(C)/C=C/C(=C/C(C1OC)c(c=O)c1C)CC(C)\C)O)\C</chem>                                                                                                                                                                                        | 601                     | No               |
| 1312                 | PM050463                                                                                                                                      | <chem>C/C=C/[C(C)/C=C/C(=C/C(C1OC)c(c=O)c1C)C(C)\C)O)\C</chem>                                                                                                                                                                                         | 601                     | No               |
| 1313                 | Actinopyrone B                                                                                                                                | <chem>C/C=C/[C(C)/C=C/C(=C/C(C1OC)cc(=O)c1C)/C)\C)O)\C</chem>                                                                                                                                                                                          | 601                     | No               |
| 1314                 | Actinopyrone A                                                                                                                                | <chem>C/C=C/[C(C)/C=C/C(=C/C(C1OC)c(c=O)c1C)/C)\C)O)\C</chem>                                                                                                                                                                                          | 601                     | No               |
| 1315                 | Actinopyrone C                                                                                                                                | <chem>C/C=C/[C(C)/C=C/C(=C/C(C1OC)c(c=O)c1C)CC(C)\C)O)\C</chem>                                                                                                                                                                                        | 601                     | No               |
| 1316                 | Ferroverdin B                                                                                                                                 | <chem>O/C=C\c1ccc(cc1)OC(=O)C1=C/C(=N/O)/C(=O)C=C1</chem>                                                                                                                                                                                              | 602                     | Yes              |
| 1317                 | Ferroverdin C                                                                                                                                 | <chem>O/N=C\1C=C(C=CC1=O)C(=O)Oc1ccc(cc1)/C=C/C(=O)O</chem>                                                                                                                                                                                            | 602                     | No               |
| 1318                 | Elaiomycin F                                                                                                                                  | <chem>CCCCCCCC[N+](=N[C@@H](COC)[C@H](C)O)[O-]</chem>                                                                                                                                                                                                  | 603                     | Yes              |
| 1319                 | Elaiomycin                                                                                                                                    | <chem>CCCCCC/C=C\N+](=N[C@@H](COC)[C@H](C)O)[O-]</chem>                                                                                                                                                                                                | 603                     | No               |
| 1320                 | Serofendic acid                                                                                                                               | <chem>CS(=O)C[C@H]1[C@H]2CC[C@@]3([C@H]1O)[C@@H](C2)[C@]1(C)CCC[C@@]([C@H]1CC3)(C)C(=O)O</chem>                                                                                                                                                        | 604                     | Yes              |
| 1321                 | Jietacine A                                                                                                                                   | <chem>CC(C)CCCCC(=O)CCCCCCN=[N+](C=C)[O-]</chem>                                                                                                                                                                                                       | 605                     | Yes              |
| 1322                 | Jietacin B                                                                                                                                    | <chem>C=C[N+](=NCCCCCCC(=O)CCCCCCC(C)C)[O-]</chem>                                                                                                                                                                                                     | 605                     | No               |
| 1323                 | JBIR-120                                                                                                                                      | <chem>CCC(c1cncc2c1C(=O)CC2)Nc1cccc1C(=O)O</chem>                                                                                                                                                                                                      | 606                     | Yes              |
| 1324                 | N-[[3,4-Dihydro-3S-hydroxy-2S-methyl-2-(4'R-methyl-3'S-pentenyl)-2H-1-benzopyran-6-yl]carbonyl]-threonine                                     | <chem>CC(=CCC[C@]1(C)Oc2ccc(cc2C[C@@H]1O)C(=O)NC(C(=O)O)[C@H](O)C)C</chem>                                                                                                                                                                             | 607                     | Yes              |
| 1325                 | Xiamenmycin D                                                                                                                                 | <chem>COC(=O)[C@H]([C@H](O)C)NC(=O)c1ccc2c(c1)C[C@@H]([C@](O2)(C)CCC=C(C)C)O</chem>                                                                                                                                                                    | 607                     | No               |
| 1326                 | Xiamenmycin                                                                                                                                   | <chem>CC(=CCC[C@]1(C)Oc2ccc(cc2C[C@@H]1O)C(=O)N[C@H](C(=O)O)[C@H](O)C)C</chem>                                                                                                                                                                         | 607                     | No               |
| 1327                 | 4,25-Diethyl-4,25-demethyl-milbemycin beta3                                                                                                   | <chem>CC[C@H]1O[C@]2(CC[C@H]1C)C[C@@H]1C[C@H](C2)C/C=C(\C)/C[C@@H](C)/C=C/C=C(/c2c(C(=O)C1)cc(CC)c(c2)O)\C</chem>                                                                                                                                      | 608                     | Yes              |
| 1328                 | 27-Formaldehyde-milbemycin beta14                                                                                                             | <chem>CC[C@H]1O[C@]2(CC[C@H]1C)C[C@@H]1C[C@H](C2)C/C=C(\C)/C[C@@H](C)/C=C/C=C(/c2c(C(=O)C1)cc(CC)c(c2)O)\CO</chem>                                                                                                                                     | 608                     | No               |
| 1329                 | Neo-actinomycin A                                                                                                                             | <chem>OC(=O)CCc1oc2c(n1)c(C(=O)N[C@@H]1[C@@H](C)OC(=O)[C@H](C(C)C)N(C)C(=O)CN(C(=O)[C@H]3N(C(=O)[C@H](NC1=O)C(C)C)CCC3)C)c1c(c2C)Oc2c(N1)c(ccc2C)C(=O)N[C@H]1[C@@H](C)OC(=O)[C@H](C(C)C)N(C)C(=O)CN(C(=O)[C@@H]2N(C(=O)[C@H](NC1=O)C(C)C)CCC2)C</chem> | 609                     | Yes              |
| 1330                 | Neo-actinomycin B                                                                                                                             | <chem>Cc1oc2c(n1)c(C(=O)N[C@@H]1[C@@H](C)OC(=O)[C@H](C(C)C)N(C)C(=O)CN(C(=O)[C@H]3N(C(=O)[C@H](NC1=O)C(C)C)CCC3)C)c1c(c2C)Oc2c(N1)c(ccc2C)C(=O)N[C@H]1[C@@H](C)OC(=O)[C@H](C(C)C)N(C)C(=O)CN(C(=O)[C@@H]2N(C(=O)[C@H](NC1=O)C(C)C)CCC2)C</chem>        | 610                     | Yes              |
| 1331                 | Demethoxy-ohmyungsamycin A                                                                                                                    | <chem>CNC(C(=O)NC(C(=O)NC1C(C)OC(=O)C(CC(=O)C(NC(=O)C(NC(=O)C(Cc2c[nH]c3c2cccc3)N(C)C(=O)C(N(C(=O)C(NC(=O)C(N(C(=O)C(NC(=O)C(NC1=O)C(C)C)C(C)C)CC(C)C)C(C)C)C(C)C)C(C)C)C(c1cccc1O)C(C)C)C(C)C)C)C</chem>                                              | 611                     | Yes              |





| Comp No <sup>a</sup> | Name                               | SMILES <sup>b</sup>                                                                                                                                                                                        | Cluster No <sup>c</sup> | Rep <sup>d</sup> |
|----------------------|------------------------------------|------------------------------------------------------------------------------------------------------------------------------------------------------------------------------------------------------------|-------------------------|------------------|
| 1354                 | Cyclomarin C                       | <chem>OC[C@@H](C[C@H]1C(=O)N[C@@H](C)C(=O)N[C@@H](C(=O)N[C@@H](C(C)C)C(=O)N[C@@H](C(=O)N[C@@H](C(=O)N[C@@H](C(=O)N1C)[C@@H](c1cn(c2c1cccc2)C(C=C)(C)C)O)[C@@H](C=C(C)C)C)CC(C)C)[C@@H](c1cccc1)OC)C</chem> | 630                     | Yes              |
| 1355                 | Hygrocin A                         | <chem>CCC1/C=C/[C@H](O)[C@H](C)OC(=O)/C(=C)CC(=O)NC2=CC(=O)c3c(C(=O)CC1)c(O)c(C)cc3C2=O)/C</chem>                                                                                                          | 631                     | Yes              |
| 1356                 | Divergolide T                      | <chem>CC[C@H]1/C=C/C[C@H](CC(C)C)OC(=O)C(=C[C@@H]2[C@]3(c4c(c(C(=O)CC1)c(O)c(c4)C)C(=O)C=C3NC2=O)O)C</chem>                                                                                                | 632                     | No               |
| 1357                 | Divergolide V                      | <chem>CC[C@H]1/C=C/C[C@H](CC(C)C)OC(=O)C(=C[C@@H]2[C@]3(c4c(c(C(=O)CC1)c(O)c(c4)C)C(=O)C=C3NC2=O)O)C</chem>                                                                                                | 632                     | No               |
| 1358                 | Divergolide U                      | <chem>CC[C@H]1/C=C/C(O)[C@H](CC(C)C)OC(=O)C(=C[C@@H]2[C@]3(c4c(c(C(=O)CC1)c(O)c(c4)C)C(=O)C=C3NC2=O)O)C</chem>                                                                                             | 632                     | No               |
| 1359                 | Hygrocin E                         | <chem>CC[C@H]1/C=C/[C@H](C)[C@H](C)OC(=O)C(=C[C@@H]2[C@]3(c4c(c(C(=O)CC1)c(O)c(C)c4)C(=O)C=C3NC2=O)O)C</chem>                                                                                              | 632                     | No               |
| 1360                 | Hygrocin D                         | <chem>CC[C@@H]1/C=C/[C@H](C)[C@H](C)OC(=O)/C(=C/[C@@H]2[C@]3(c4c(c(C(=O)CC1)c(O)c(C)c4)C(=O)C=C3NC2=O)O)/C</chem>                                                                                          | 632                     | No               |
| 1361                 | Hygrocin C                         | <chem>CCC1/C=C/C(O)C(C)OC(=O)C(=O)/C(=C/[C@@H]2[C@]3(c4c(c(C(=O)CC1)c(O)c(C)c4)C(=O)C=C3NC2=O)O)/C</chem>                                                                                                  | 632                     | No               |
| 1362                 | Divergolide D                      | <chem>CC[C@H]1/C=C/[C@H](OC(=O)/C(=C/[C@@H]2[C@]3(c4c(c(C(=O)CC1)c(O)c(C)c4)C(=O)C=C3NC2=O)O)C)[C@H](C=C(C)C)O</chem>                                                                                      | 632                     | No               |
| 1363                 | Hygrocin F                         | <chem>CC[C@H]1/C=C/[C@H](OC(=O)C(=C[C@@H]2[C@]3(c4c(c(C(=O)CC1)c(O)c(C)c4)C(=O)C=C3NC2=O)O)C)C(O)C</chem>                                                                                                  | 632                     | Yes              |
| 1364                 | Hygrocin G                         | <chem>CCC1/C=C/[C@H](OC(=O)[C@@]2(C)C=CC(=O)NC3=C2C(=O)c2c(C(=O)CC1)c(O)c(cc2C3=O)C)C(O)C</chem>                                                                                                           | 633                     | Yes              |
| 1365                 | Hygrocin B                         | <chem>CCC1/C=C/[C@H](O)[C@H](C)OC(=O)[C@@]2(C3=C(C(=O)c4c(c(C(=O)CC1)c(O)c(c4)C3=O)NC(=O)C=C2)C</chem>                                                                                                     | 633                     | No               |
| 1366                 | Benzastatin E                      | <chem>COC[C@]([C@@H]1Cc2c(N1)ccc(c2)C(=O)N)(CCC(=C(C)C)C)O</chem>                                                                                                                                          | 634                     | Yes              |
| 1367                 | Benzastatin D                      | <chem>COC[C@@]1(CCC(=C(C)C)C)Nc2ccc(cc2[C@H]1O)C(=O)N</chem>                                                                                                                                               | 634                     | No               |
| 1368                 | Benzastatin F                      | <chem>CC(=C(CCC([C@H]1Cc2c(N1)ccc(c2)C(=O)N)(O)C)C)C</chem>                                                                                                                                                | 634                     | No               |
| 1369                 | A-503451 B                         | <chem>COC[C@]([C@H]1Cc2c(N1)ccc(c2)C(=O)O)(CCC(=C(C)C)C)O</chem>                                                                                                                                           | 635                     | Yes              |
| 1370                 | 7-Hydroxyl-O-demethylbenzastatin D | <chem>OC[C@]1(CCC(=C(C)C)C)Nc2ccc(cc2[C@H]1O)C(=O)O</chem>                                                                                                                                                 | 635                     | No               |
| 1371                 | A-503451 D                         | <chem>COC[C@]1(CCC(=C(C)C)C)Nc2ccc(cc2[C@H]1O)C(=O)O</chem>                                                                                                                                                | 635                     | No               |
| 1372                 | 7-Hydroxyl benzastatin F           | <chem>CC(=C(CCC[C@]([C@H]1Cc2c(N1)ccc(c2)C(=O)O)(O)C)C)C</chem>                                                                                                                                            | 635                     | No               |
| 1373                 | Ent-DDHK                           | <chem>OC(=O)C[C@@H]1O[C@H](C)c2c(C1)cc1c(c2O)c(O)ccc1</chem>                                                                                                                                               | 636                     | No               |
| 1374                 | T3HN                               | <chem>OC(=O)C[C@H]1O[C@H](C)c2c(C1)c(O)c1c(c2O)c(O)ccc1</chem>                                                                                                                                             | 636                     | Yes              |
| 1375                 | Epi-DDHK                           | <chem>OC(=O)C[C@H]1O[C@@H](C)c2c(C1)cc1c(c2O)c(O)ccc1</chem>                                                                                                                                               | 636                     | No               |
| 1376                 | DHK-OH                             | <chem>OC(=O)C[C@H]1O[C@H](C)c2c(C1)c(O)c1c(c2O)c(O)ccc1O</chem>                                                                                                                                            | 636                     | No               |
| 1377                 | DDHK                               | <chem>OC(=O)C[C@@H]1CC2=C([C@H](O1)C)C(=O)c1c(C2)cccc1O</chem>                                                                                                                                             | 636                     | No               |
| 1378                 | Nanaomycin alphaA                  | <chem>COC(=O)C[C@@H]1O[C@H](C)C2=C(C1)C(=O)c1c(C2=O)c(O)ccc1</chem>                                                                                                                                        | 636                     | No               |
| 1379                 | Deoxyfrenolicin                    | <chem>CCC[C@H]1O[C@H](CC(=O)O)CC2=C1C(=O)c1c(C2=O)cccc1O</chem>                                                                                                                                            | 636                     | No               |
| 1380                 | Phenalinolactone D                 | <chem>COC1CCC(OC1C)OCC1(COC(=O)c2[nH]ccc2)C(OC(=O)C)CC(C2(C1CCC1(C2CC=C(C1C1=C(O)C(=O)OC1O)C)C)C</chem>                                                                                                    | 637                     | Yes              |
| 1381                 | Phenalinolactone B                 | <chem>COC1CCC(OC1C)OCC1(COC(=O)c2[nH]ccc2)C(OC(=O)C)CC(C2(C1CCC1(C2CC=C(C1C1=C(O)C(=O)OC1O)C)C)O</chem>                                                                                                    | 638                     | Yes              |
| 1382                 | Phenalinolactone A                 | <chem>COC1CCC(OC1C)OC[C@]1(COC(=O)c2ccc([nH]2)C)[C@H](OC(=O)C)[C@@H]([C@@]2(C1CC[C@@]1([C@H]2CC=C([C@H]1C1=C(O)C(=O)OC1O)C)C)O</chem>                                                                      | 638                     | No               |
| 1383                 | Phenalinolactone C                 | <chem>COCc1ccc([nH]1)C(=O)OC[C@]1(CO[C@H]2CC[C@H]([C@@H](O2)C)OC)[C@H](OC(=O)C)[C@@H]([C@@]2([C@@H]1CC[C@@]1([C@H]2CC=C([C@H]1C1=C(O)C(=O)OC1O)C)C)O</chem>                                                | 638                     | No               |
| 1384                 | Zoumbericin A                      | <chem>COc1cc(oc(=O)c1)Cc1cccc(c1C(=O)c1cccc1)O</chem>                                                                                                                                                      | 639                     | Yes              |
| 1385                 | Ruthmycin                          | <chem>CCC[C@H]1O[C@H](CC(=O)O)C=C2[C@@]31CC(=O)C[C@@]2(c1c(C3=O)c(O)ccc1)O</chem>                                                                                                                          | 640                     | Yes              |
| 1386                 | Actinorhodin                       | <chem>OC(=O)C[C@H]1O[C@H](C)c2c(C1)c(O)c1c(c2O)C(=O)C(=CC1=O)C1=CC(=O)c2c(C1=O)c(O)c1c(c2O)C[C@H](O)[C@@H]1C)CC(=O)O</chem>                                                                                | 641                     | Yes              |
| 1387                 | Actionorhodin                      | <chem>OC(=O)C[C@@H]1O[C@H](C)C2=C(C1)C(=O)c1c(C2=O)c(O)c(cc1O)c1cc(O)c2c(c1O)C(=O)C1=C(C2=O)C[C@@H](O)[C@@H]1C)CC(=O)O</chem>                                                                              | 641                     | No               |
| 1388                 | 7-Demethyl-glucopiericidin A       | <chem>OC[C@H]1O[C@H](OC[C@H]2O[C@H](O[C@H](/C(=C/C)/C)[C@@H](/C=C/C/C/C(=C/Cc3[nH]c(OC)c(c(=O)c3C)OC)/C)[C@@H]([C@H](/C@H]2O)O)O)[C@@H]([C@H](/C@H]1O)O)O</chem>                                           | 642                     | No               |

| Comp No <sup>a</sup> | Name                                                                                                                                                                                                                                                                          | SMILES <sup>b</sup>                                                                                                                                                                                      | Cluster No <sup>c</sup> | Rep <sup>d</sup> |
|----------------------|-------------------------------------------------------------------------------------------------------------------------------------------------------------------------------------------------------------------------------------------------------------------------------|----------------------------------------------------------------------------------------------------------------------------------------------------------------------------------------------------------|-------------------------|------------------|
| 1389                 | Glucopiericidinol A3                                                                                                                                                                                                                                                          | <chem>OC[C@H]1O[C@H](OC[C@H]2O[C@H](O[C@@H](C(=CC)C)[C@@H](C=C/C=CCC(=CCc3[nH]c(OC)c(c(=O)c3C)OC)C)C)[C@@H]([C@H]([C@@H]2O)O)O)[C@@H]([C@H]([C@H]1O)O)O</chem>                                           | 642                     | No               |
| 1390                 | BE-14324-113                                                                                                                                                                                                                                                                  | <chem>OCC1OC(OCC2OC(OC(/C(=C/C)/C)[C@@H](/C=C(/C=C/CC(/C=C/c3nc(OC)c(c(c3C)O)OC)(O)C)\C)C)C(C(C2O)O)O)C(C(C1O)O)O</chem>                                                                                 | 642                     | No               |
| 1391                 | (2R,3R,4S,5S,6R)-2-(((2E,4R,5R,6E,8E,11E)-13-(4-Hydroxy-5,6-dimethoxy-3-methylpyridin-2-yl)-3,5,7,11-tetramethyltrideca-2,6,8,11-tetraen-4-yl)oxy)-6-(((2S,3R,4S,5S,6R)-3,4,5-trihydroxy-6-(hydroxymethyl)tetrahydro-2H-pyran-2-yl)oxy)methyl)tetrahydro-2H-pyran-3,4,5-triol | <chem>OC[C@H]1O[C@H](OC[C@H]2O[C@H](O[C@@H](C(=C/C)/C)[C@@H](/C=C(/C=C/C/C(=C/Cc3nc(OC)c(c(c3C)O)OC)/C)\C)C)O[C@@H]1O[C@H](CO[C@H]2O[C@H](CO)[C@@H]([C@@H]([C@H]2O)O)O)[C@@H]([C@H]([C@H]1O)O)O)C</chem> | 642                     | Yes              |
| 1392                 | 13-Hydroxypiericidin A 10-O-alpha-D-galactose (1→6)-beta-D-glucoside                                                                                                                                                                                                          | <chem>OC/C=C(/[C@@H]([C@@H](/C=C(/C=C/C/C(=C/Cc1nc(OC)c(c(c1C)O)OC)/C)\C)C)O[C@@H]1O[C@H](CO[C@H]2O[C@H](CO)[C@@H]([C@@H]([C@H]2O)O)O)[C@@H]([C@H]([C@H]1O)O)O)C</chem>                                  | 642                     | No               |
| 1393                 | 13-Hydroxypiericidin A 10-O-alpha-D-glucose (1→6)-beta-D-glucoside                                                                                                                                                                                                            | <chem>OC/C=C(/[C@@H]([C@@H](/C=C(/C=C/C/C(=C/Cc1nc(OC)c(c(c1C)O)OC)/C)\C)C)O[C@@H]1O[C@H](CO[C@H]2O[C@H](CO)[C@@H]([C@@H]([C@H]2O)O)O)[C@@H]([C@H]([C@H]1O)O)O)C</chem>                                  | 642                     | No               |
| 1394                 | (2R,3R,4S,5S,6R)-2-(((2E,4R,5R,6E,8E,11E)-13-(4-Hydroxy-5,6-dimethoxy-3-methylpyridin-2-yl)-3,5,7,11-tetramethyltrideca-2,6,8,11-tetraen-4-yl)oxy)-6-(((2S,3R,4S,5R,6R)-3,4,5-trihydroxy-6-(hydroxymethyl)tetrahydro-2H-pyran-2-yl)oxy)methyl)tetrahydro-2H-pyran-3,4,5-triol | <chem>OC[C@H]1O[C@H](OC[C@H]2O[C@H](O[C@@H](/C(=C/C)/C)[C@@H](/C=C(/C=C/C/C(=C/Cc3nc(OC)c(c(c3C)O)OC)/C)\C)C)[C@@H]([C@H]([C@@H]2O)O)O)[C@@H]([C@H]([C@H]1O)O)O</chem>                                   | 642                     | No               |
| 1395                 | 4'-O-beta-D-Glucose 13-hydroxyglucopiericidin A                                                                                                                                                                                                                               | <chem>OC/C=C(/[C@@H]([C@@H](/C=C(/C=C/C/C(=C/Cc1nc(OC)c(c(c1C)O)[C@H]1O[C@H](CO)[C@H](C([C@H]1O)O)O)OC)/C)\C)C)O[C@@H]1O[C@H](CO)[C@H]([C@@H]([C@H]1O)O)O)C</chem>                                       | 643                     | Yes              |
| 1396                 | 4'-O-beta-D-Glucose glucopiericidin A                                                                                                                                                                                                                                         | <chem>C/C=C(/[C@@H]([C@@H](/C=C(/C=C/C/C(=C/Cc1nc(OC)c(c(c1C)O)[C@H]1O[C@H](CO)[C@H](C([C@H]1O)O)O)OC)/C)\C)C)O[C@@H]1O[C@H](CO)[C@H]([C@@H]([C@H]1O)O)O)C</chem>                                        | 643                     | No               |
| 1397                 | 3'-Deoxytalopiericidin A1                                                                                                                                                                                                                                                     | <chem>C/C=C(\[C@@H]([C@@H](/C=C(\C=C/C/C(=C/Cc1nc(OC)c(c(c1C)O)[C@H]1O[C@H](C)[C@@H]([C@@H]([C@H]1O)O)O)OC)/C)\C)O)C</chem>                                                                              | 644                     | Yes              |
| 1398                 | Glucopiericidin B                                                                                                                                                                                                                                                             | <chem>OCC1OC(Oc2c(C)c(C/C=C(/C/C=C/C(C(C(=C/C)/C)O)C)/C)nc(c2OC)OC)C(C(C1O)O)O</chem>                                                                                                                    | 644                     | No               |
| 1399                 | 3'-Rhamnopericidin A1                                                                                                                                                                                                                                                         | <chem>C/C=C(\[C@@H]([C@@H](/C=C(\C=C/C/C(=C/Cc1nc(OC)c(c(c1C)O)[C@H]1O[C@@H](C)[C@@H]([C@H]([C@H]1O)O)O)OC)/C)\C)O)C</chem>                                                                              | 644                     | No               |
| 1400                 | Awamycin                                                                                                                                                                                                                                                                      | <chem>COC(=O)C1C(O)C(C)C(O)C(C)/C=C(/C)\C(=O)c2c(OC)c(C)c(c3c2C(=O)C(=C(NC(=O)/C(=C/C=C/C(C(C1O)C)O)C)/C)C3=O)SC)O</chem>                                                                                | 645                     | Yes              |
| 1401                 | Incednine                                                                                                                                                                                                                                                                     | <chem>CN[C@H]1[C@@H](OC[C@H]([C@@H]([C@H]1O)O)[C@H]1CC[C@@H]([C@H]([O]1C)NC)O[C@H]1/C=C\C=C=C/C=C=C/C=C=C/C=C/C[C@@H](NC(=O)/C(=C/C(=C/C=C/C/C[C@@H]1(C)O)/C)/OC)C)\C</chem>                             | 646                     | Yes              |
| 1402                 | SIP-B1                                                                                                                                                                                                                                                                        | <chem>CC[C@@H](C/C/1=C/C(=C/C=C/C=C/C[C@@H](C)(O)C(/C=C/C=C/C=C/C=C/C=C/C[C@@H](CNC1=O)C)\C)OC1OCC([C@@H](C1N)O)OC1COC([C@@H](C1O)O)C)\C</chem>                                                          | 647                     | No               |
| 1403                 | SIP-C                                                                                                                                                                                                                                                                         | <chem>C/C/1=C/C=C/C=C/C[C@H](C)CNC(=O)/C(=C/C(=C/C=C/C=C/C[C@@H](C/C=C/C=C)OC1OCC([C@@H](C1N)O)OC1OC(C)C([C@H](C1)C)O)N(C)C(C)O)/C/CC(C)C)\C</chem>                                                      | 647                     | Yes              |
| 1404                 | SIP-A1                                                                                                                                                                                                                                                                        | <chem>C/C/1=C/C=C/C=C/C[C@H](C)CNC(=O)/C(=C/C(=C/C=C/C=C/C[C@@H](C/C=C/C=C)OC1OCC([C@@H](C1N)O)OC1COC([C@@H](C1O)O)C(C)O)/C/CC(C)C)\C</chem>                                                             | 647                     | No               |
| 1405                 | SIP-A2b                                                                                                                                                                                                                                                                       | <chem>C/C/1=C/C=C/C=C/C[C@H](C)CNC(=O)/C(=C/C(=C/C=C/C=C/C[C@@H](C/C=C/C=C)OC1OCC([C@@H](C1N)O)OC1OC(C)C([C@H](C1)C)O)O(C)O)/C/CC(C)C)\C</chem>                                                          | 647                     | No               |

| Comp No <sup>a</sup> | Name                                                                                                                  | SMILES <sup>b</sup>                                                                                                                                                                                | Cluster No <sup>c</sup> | Rep <sup>d</sup> |
|----------------------|-----------------------------------------------------------------------------------------------------------------------|----------------------------------------------------------------------------------------------------------------------------------------------------------------------------------------------------|-------------------------|------------------|
| 1406                 | SIP-B3                                                                                                                | CC[C@@H](C/C1=C\C=C=C\C=C=C\C[C@@](C)(O)C/C=C\C=C=C\C=C=C\C=C[C@@H](CNC1=O)C)C)OC1OCC([C@@H](C1N)O)OC1OC(C)C[C@@H](C1N(C)C)C                                                                       | 647                     | No               |
| 1407                 | SIP-A3                                                                                                                | CC1OC(OC2OC(C([C@H]2O)N)OC2/C=C\C=C=C\C=C=C\C=C[C@@H](C)CNC(=O)/C(=C/C=C/C=C/C=C/C/C[C@@]2(C)O)/C/CC(C)C)C)C[C@H](C1N(C)C)C                                                                        | 647                     | No               |
| 1408                 | SIP-A2                                                                                                                | C/C1=C\C=C=C\C=C[C@@H](C)CNC(=O)/C(=C/C=C/C=C=C/C[C@@](C/C=C\C=C=C1)OC1OCC([C@@H](C1N)O)OC1C[C@@H](O)C(C(O1)C)O(C)O)/C/CC(C)C)C                                                                    | 647                     | No               |
| 1409                 | dOHSipA                                                                                                               | C/C1=C\C=C=C\C=C[C@@H](C)NC(=O)/C(=C/C=C=C\C=C=C\C=C[C@@H]([C@H]/C=C\C=C1)O[C@@H]1OC[C@H]([C@@H]([C@H]1N)O)O[C@@H]1O[C@H](C)[C@H]([C@](C1)(C)O)N(C)C)C)C/CC(C)C)C                                  | 647                     | No               |
| 1410                 | SIP-D                                                                                                                 | CC[C@@H](C/C1=C\C=C=C\C=C=C\C[C@@](C)(O)C/C=C\C=C=C\C=C=C\C=C[C@@H](CNC1=O)C)C)OC1OCC([C@@H](C1N)O)OC1OC(C)C([C@](C1)(C)O)N(C)C)C                                                                  | 647                     | No               |
| 1411                 | dNHSipA                                                                                                               | C/C1=C\C=C=C\C=C[C@@H](C)NC(=O)/C(=C/C=C=C\C=C=C\C=C[C@@]([C@H]/C=C\C=C1)O[C@@H]1OC[C@H]([C@@H]([C@H]1N)O)O[C@@H]1O[C@H](C)C(=O)[C@](C1)(C)O(C)O)/C/CC(C)C)C                                       | 647                     | No               |
| 1412                 | dSipA                                                                                                                 | C/C1=C\C=C=C\C=C[C@@H](C)NC(=O)/C(=C/C=C=C\C=C=C\C=C[C@@]([C@H]/C=C\C=C1)O[C@@H]1OC[C@H]([C@@H]([C@H]1N)O)O[C@@H]1C[C@@H](O)C@H]([C@H](O1)C)N(C)C)C)O)/C(C)C)C                                     | 648                     | Yes              |
| 1413                 | Sipanmycin A                                                                                                          | C/C1=C\C=C=C\C=C[C@@H](C)NC(=O)/C(=C/C=C/C=C=C/C/C[C@@]([C@H]/C=C\C=C1)O[C@H]1OC[C@H]([C@H]([C@H]1N)O)O[C@@H]1CC[C@H]([C@@H](O1)C)N(C)C)C)O)/C/CC(C)C)C                                            | 648                     | No               |
| 1414                 | Sipanmycin B                                                                                                          | CC[C@@H](C/C1=C\C=C=C\C=C=C\C[C@@](C)(O)[C@H]/C=C\C=C=C\C=C=C\C=C[C@@H](N C1=O)C)C)O[C@@H]1OC[C@H]([C@@H]([C@H]1N)O)O[C@@H]1O[C@H](C)[C@H]([C@](C1)(C)O)N(C)C)C                                    | 648                     | No               |
| 1415                 | 3'-O-Demethylsilvalactam                                                                                              | C/C1=C\C=C=C\C=C[C@@H](C)NC(=O)/C(=C/C=C=C\C=C=C\C=C[C@@]([C@H]/C=C\C=C1)O[C@@H]1OC[C@H]([C@@H]([C@H]1N)O)O(C)O)/C/CC(C)C)C                                                                        | 648                     | No               |
| 1416                 | Silvalactam                                                                                                           | CO[C@H]1[C@H](O)COC(C1N)OC1/C=C\C=C=C\C=C=C\C=C(CCC(NC(=O)/C(=C/C=C/C=C=C/C1(C)O)/C/CC(C)C)C)C                                                                                                     | 648                     | No               |
| 1417                 | AgB+S1                                                                                                                | CC[C@@H](C/C1=C/C=C/C=C=C/C[C@@](C)(O)[C@H]/C=C\C=C=C\C=C=C\C=C[C@@H](N C1=O)C)C)O[C@@H]1OC[C@H]([C@@H]([C@H]1N)O)O)/C                                                                             | 648                     | No               |
| 1418                 | Auroramycin                                                                                                           | C/C1=C\C=C=C\C=C[C@@H](C)NC(=O)/C(=C/C=C=C/C=C=C/C[C@@]([C@H]/C=C\C=C1)O[C@@H]1OC[C@H]([C@@H]([C@H]1N)O)O[C@@H]1O[C@H](C)[C@H]([C@](C1)(C)O)N(C)C)C)O)/C/CC(C)C)C                                  | 648                     | No               |
| 1419                 | dSipB                                                                                                                 | CC[C@@H](C/C1=C/C=C/C=C=C/C[C@@](C)(O)[C@H]/C=C\C=C=C\C=C=C\C=C[C@@H](N C1=O)C)C)O[C@@H]1OC[C@H]([C@@H]([C@H]1N)O)O[C@@H]1C[C@@H](O)C@H]([C@H](O1)C)N(C)C)C)C                                      | 648                     | No               |
| 1420                 | Heronamide F                                                                                                          | C/C=C/C=C/C[C@@H]1C/C=C/C=C\C(C)/C=C/C=C[C@@H]([C@H]/C=C/C=C/C=C/C(=O)N1)\C)O)O                                                                                                                    | 649                     | Yes              |
| 1421                 | Bombyxamycin A                                                                                                        | C[C@@H]1/C=C\C=C=C/C=C=C\C=C(=O)C[C@@H](C/C=C\C=C=C/C=C=C\C=C(=O)NC1)/C)O                                                                                                                          | 650                     | Yes              |
| 1422                 | (3Z,5E,7Z,9Z,12R,13E,15E,17Z,19Z,21Z,23R)-12-Hydroxy-23-methyl-1-azacyclotetracos-3,5,7,9,13,15,17,19,21-nonaen-2-one | C[C@@H]1/C=C\C=C=C/C=C=C\C=C=C\C[C@@H](O)C/C=C\C=C=C/C=C=C\C=C(=O)NC1                                                                                                                              | 651                     | Yes              |
| 1423                 | Cyclamenol A                                                                                                          | CC1/C=C/C=C/C=C\C=C=C\C(O)C/C=C/C=C/C=C/C(=O)NC1                                                                                                                                                   | 651                     | No               |
| 1424                 | Bafilomycin A                                                                                                         | COC1C=CC=C(C)CC(C)C(O)C(C(=CC=C(C(=O)OC1C(C(C1O)CC(O)C(C(O1)C(C)C)C)O)C)O)C)C                                                                                                                      | 652                     | Yes              |
| 1425                 | Concanamycin B                                                                                                        | C/C=C/[C@H]1O[C@](O)(C[C@H]([C@@H]1C)O[C@H]1C[C@@H](O)[C@@H]([C@H](O1)C)OC(=O)N)[C@H]([C@@H]([C@@H]([C@H]1OC(=O)/C(=C/C=C/[C@@H](C)[C@@H](O)[C@H]([C@H]([C@@H](C/C(=C/C=C/[C@@H]1OC)/C)O)C)/OC)O)C | 653                     | Yes              |
| 1426                 | Concanamycin D                                                                                                        | C/C=C/C1OC(O)(CC(C1C)O[C@@H]1C[C@@H](O)[C@@H]([C@H](O1)C)O)C(C(C1OC(=O)/C(=C/C=C(C)C)O)C(C(C/C(=C/C=C/C1OC)/C)O)C)/OC)O)C                                                                          | 653                     | No               |
| 1427                 | Concanamycin E                                                                                                        | C/C=C/C1OC(O)(CC(C1C)OC1CC(O)C(C(O1)C)OC(=O)N)C(C(C1OC(=O)/C(=C/C=C(C)C)O)C(C(C/C(=C/C=C/C1OC)/C)O)C)/OC)O)C                                                                                       | 654                     | No               |
| 1428                 | Viranamycin B                                                                                                         | COC1C=C/C=C(C)/CC(C)C(O)C(C)C(C(C(C(C(C1O)CC(OC2CC(O)C(C(O2)C)OC(=O)N)C(C(O1)C)C)C)O)C)OC)C)O                                                                                                      | 654                     | No               |
| 1429                 | Concanamycin F                                                                                                        | C/C=C/[C@H]1O[C@](O)(C[C@H]([C@@H]1C)O)[C@H]([C@@H]([C@@H](C1OC(=O)/C(=C/C=C/[C@@H](C)[C@@H](O)[C@H]([C@H]([C@@H](C/C(=C/C=C/[C@@H]1OC)/C)O)CC)C)/OC)O)C                                           | 654                     | No               |
| 1430                 | Concanamycin                                                                                                          | C/C=C/[C@H]1O[C@](O)(C[C@H]([C@@H]1C)O)[C@H]([C@@H]([C@@H](C1OC(=O)/C(=C/C=C/[C@@H](C)[C@@H](O)[C@H]([C@H]([C@@H](C/C(=C/C=C/[C@@H]1OC)/C)O)CC)C)/OC)O)C                                           | 654                     | No               |
| 1431                 | Concanamycin C                                                                                                        | C/C=C/C1OC(O)(CC(C1C)O[C@@H]1C[C@@H](O)[C@@H]([C@H](O1)C)O)C(C(C1OC(=O)/C(=C/C=C(C)C)O)C(C(C/C(=C/C=C/C1OC)/C)O)CC)C)/OC)O)C                                                                       | 654                     | Yes              |

| Comp No <sup>a</sup> | Name                                                       | SMILES <sup>b</sup>                                                                                                                                                                                                                        | Cluster No <sup>c</sup> | Rep <sup>d</sup> |
|----------------------|------------------------------------------------------------|--------------------------------------------------------------------------------------------------------------------------------------------------------------------------------------------------------------------------------------------|-------------------------|------------------|
| 1432                 | Concanamycin A                                             | <chem>C/C=C/[C@H]1O[C@](O)(C[C@H]([C@@H]1C)O[C@H]1C[C@H](O)[C@@H]([C@H](O1)C)OC(=O)N)[C@H]([C@@H]([C@@H]([C@H]1OC(=O)/C=C/C=C/[C@H](C)[C@@H](O)[C@H]([C@H]([C@@H]([C/C=C/C/[C@@H]1OC)/C)C)O)CC)/C)OC)C)O)C</chem>                          | 655                     | Yes              |
| 1433                 | Linearolide A                                              | <chem>COC1CC/C=C(C)/C=C(C)OC2CC(NC(=O)C)C(C(OC2)O)C(C)CC(C2OC(C(C(=O)OC1/C=C/C=C/C(C(O)C)C)/C)C)O)C(OC)C(C2C)O)OC</chem>                                                                                                                   | 656                     | Yes              |
| 1434                 | 5,6-Dihydro-kirromycin                                     | <chem>C/C=C/C=C/C1OC(O)([C@@H](C(=O)NC/C=C/C=C/[C@H]([C@H](C2OC([C@@H]([C@@H]2O)O)/C=C/C=C/C=C/[C(=O)C2=C(O)CCNC2=O])C)C)OC)C)CC)C(C(C1(C)C)O)O</chem>                                                                                     | 657                     | Yes              |
| 1435                 | Kirrothricin                                               | <chem>C/C=C/C=C/[C@H]1O[C@](O)(C[C@H](C1(C)C)O)C(C(=O)NC/C=C/C=C/[C(C(C(C/C=C/C=C/C=C/C=C/[C(=O)CCN(C1=O)C)/O)C)O)C)OC)C)CC</chem>                                                                                                         | 657                     | No               |
| 1436                 | 20-O-Demethyl-kirromycin                                   | <chem>C/C=C/C=C/C1OC(O)([C@@H](C(=O)NC/C=C/C=C/[C@H]([C@H](C2OC([C@@H]([C@@H]2O)O)/C=C/C=C/C=C/[C(=O)C2=C(O)CCNC2=O])C)C)OC)C)CC)C(C(C1(C)C)O)O</chem>                                                                                     | 657                     | No               |
| 1437                 | Kirromycin B                                               | <chem>C/C=C/C=C/[C@H]1O[C@](O)([C@@H](C(=O)NC/C=C/C=C/[C@H]([C@H]([C@@H]2O[C@H]([C@@H]([C@@H]2O)O)/C=C/C=C/C=C/[C(=O)c2c(O)cc[nH]c2=O])C)C)OC)C)CC)[C@@H]([C@@H]([C1(C)C)O)O</chem>                                                        | 657                     | No               |
| 1438                 | 30-Hydroxy-5,6-dehydro- 1-N-demethyl-16-deoxy-kirrothricin | <chem>C/C=C/C=C/C1OC(O)([C@@H](C(=O)NC/C=C/C=C/[C@H]([C@H](C/C=C/C=C/C=C/C=C/C(=O)c2c(O)cc[nH]c2=O))C)O)C(OC)C)CC)C(C(C1(C)C)O)O</chem>                                                                                                    | 657                     | No               |
| 1439                 | 30-Deoxy-kirromycin                                        | <chem>C/C=C/C=C/C1OC(O)(CC(C1(C)C)O)C[C@H](C(=O)NC/C=C/C=C/[C@H]([C@H](C1OC([C@@H]([C@@H]1O)O)/C=C/C=C/C=C/[C(=O)C1=C(O)CCNC1=O])C)C)OC)C)CC</chem>                                                                                        | 657                     | No               |
| 1440                 | Kirromycin                                                 | <chem>C/C=C/C=C/[C@H]1O[C@](O)([C@@H](C(=O)NC/C=C/C=C/[C@H]([C@H]([C@@H]2O[C@H]([C@@H]([C@@H]2O)O)/C=C/C=C/C=C/[C(=O)c2c(O)cc[nH]c2=O])C)C)OC)C)CC)[C@@H]([C@@H]([C1(C)C)O)O</chem>                                                        | 657                     | No               |
| 1441                 | Factumycin                                                 | <chem>C/C=C/C=C/[C@H]1O[C@](O)(C[C@H](C1(C)C)O)C(C(=O)NC/C=C/C=C/[C@H]([C@H](C/[C@H]([C=C/C=C/C=C/C=C/C(=O)c1c(O)ccn(c1=O)C)/O)C)O)C)OC)C)CC</chem>                                                                                        | 657                     | No               |
| 1442                 | Aurodox                                                    | <chem>C/C=C/C=C/[C@H]1O[C@](O)([C@@H](C(=O)NC/C=C/C=C/[C@H]([C@H](C2O[C@H]([C@@H]([C@@H]2O)O)/C=C/C=C/C=C/[C(=O)C=C(C2=O)C)/O)C)C)OC)C)CC)[C@@H]([C@@H]([C1(C)C)O)O</chem>                                                                 | 657                     | No               |
| 1443                 | Kirromycin C                                               | <chem>C/C=C/C=C/[C@H]1O[C@](O)(C[C@H](C1(C)C)O)C[C@H](C(=O)NC/C=C/C=C/[C@H]([C@H]([C@@H]1O[C@H]([C@@H]([C@@H]1O)O)/C=C/C=C/C=C/[C(=O)c1c(O)cc[nH]c1=O)C)C)OC)C)CC</chem>                                                                   | 657                     | No               |
| 1444                 | Mocimycin                                                  | <chem>C/C=C/C=C/[C@H]1O[C@](O)([C@@H]([C@H](C1(C)C)O)O)C[C@H](C(=O)NC/C=C/C=C/[C@H]([C@H]([C@H]([C@H]1O[C@H]([C@@H]([C@@H]1O)O)/C=C/C=C/C=C/[C(=O)C=C(C1=O)O)C)C)OC)C)CC</chem>                                                            | 657                     | No               |
| 1445                 | Efrotomycin                                                | <chem>C/C=C/C=C/C1OC(O)(C(C(=O)NC/C=C/C=C/[C(C(C2OC(C(C2O)O)/C=C/C=C/C=C/[C(=O)C2=O)C=CN(C2=O)C)/O)C)C)OC)C)CC)C(C(C1(C)C)OC1OC(C)C(C(C1OC)O)OC)O</chem>                                                                                   | 658                     | Yes              |
| 1446                 | Bisoxazolomycin                                            | <chem>CO[C@H]([C@]1(O)[C@@H](C)C(=O)N([C@]1(COC(=O)[C@@]1(CO)N(C)C(=O)[C@H]([C@@]1(O)[C@H]([C@H]([C@H]C=CC=CCNC(=O)C([C@H]([C(=CC=CC=Cc1cnc1)C)O)(C)C)O)C)C(=O)O)C)[C@H]([C@H]([C=CC=CCNC(=O)C([C@H]([C(=CC=CC=Cc1cnc1)C)O)(C)C)O)C</chem> | 659                     | Yes              |
| 1447                 | Lajollamycin                                               | <chem>COC(C1(O)C(C)C(=O)N(C21C(C)OC2=O)C)CC(C(/C=C/C=C/C/CNC(=O)C(C(/C(=C/C=C/C=C/C(=C(/[N+](=O)[O-])C)/C)C)O)C)C)O)C</chem>                                                                                                               | 660                     | No               |
| 1448                 | Triedimycin B                                              | <chem>COC(C1(O)C(C)C(=O)N(C21C(C)OC2=O)C)CC(C(/C=C/C=C/C/CNC(=O)C(C(/C(=C/C=C/C=C/C/Cc1cnc(=O)C)C)O)C)C)O)C</chem>                                                                                                                         | 660                     | No               |
| 1449                 | Triedimycin A                                              | <chem>COC(C1OC(=O)C21N(C)C(=O)C(C2(O)C(CC(C(/C=C/C=C/C/CNC(=O)C(C(/C(=C/C=C/C=C/C/Cc1cnc(=O)C)C)O)C)C)O)C)OC)C</chem>                                                                                                                      | 660                     | No               |
| 1450                 | Oxazolomycin A                                             | <chem>CO[C@H]([C@]1(O)[C@@H](C)C(=O)N([C@]12COC2=O)C)C[C@H]([C@H]([C=C/C=C/C/CNC(=O)C([C@@H]([C=C/C=C/C=C/C/Cc1ocnc1)/C)O)(C)C)O)C</chem>                                                                                                  | 660                     | No               |
| 1451                 | Lajollamycin D                                             | <chem>CO[C@H]([C@]1(O)[C@@H](C)C(=O)N([C@]12[C@H](C)OC2=O)C)C[C@H]([C@H]([C=C/C=C/C/CNC(=O)C([C@@H]([C=C/C=C/C=C/C(=C(/N(=O)O)C)/C)C)O)C)C)O)C</chem>                                                                                      | 660                     | No               |
| 1452                 | Lajollamycin B                                             | <chem>CO[C@H]([C@]1(O)[C@@H](C)C(=O)N([C@]12COC2=O)C)C[C@H]([C@H]([C=C/C=C/C/CNC(=O)C([C@@H]([C=C/C=C/C=C/C(=C(/N(=O)O)C)/C)C)O)C)C)O)C</chem>                                                                                             | 660                     | No               |
| 1453                 | Lajollamycin C                                             | <chem>CO[C@H]([C@]1(O)[C@@H](C)C(=O)N([C@]12[C@H](C)OC2=O)C)C[C@H]([C@H]([C=C/C=C/C/CNC(=O)C([C@@H]([C=C/C=C/C=C/C(=C(/N(=O)O)C)/C)C)O)C)C)O)C</chem>                                                                                      | 660                     | No               |
| 1454                 | Curromycin B                                               | <chem>COC(C1(O)C(C)C(=O)N(C21C(C)OC2=O)C)CC(C(/C=C/C=C/C/CNC(=O)C(C(/C(=C/C=C/C=C/C/Cc1cnc(=O)C)C)O)C)C)O)C</chem>                                                                                                                         | 660                     | No               |
| 1455                 | Diffusomycin                                               | <chem>CO[C@H]([C@]1(O)[C@@H](C)C(=O)N(C21COC2=O)C)C[C@H]([C@H]([C=C/C=C/C/CNC(=O)C(C(/C(=C/C=C/C=C/C/Cc1ocnc1)/C)O)(C)C)O)C</chem>                                                                                                         | 660                     | Yes              |
| 1456                 | Osmanicin                                                  | <chem>O=C1O[C@H]2[C@H]3N1CC[C@H]1C3=C([C@@H]2O)[C@@H](C)[C@@H]([C@]21C=CC1=C2C(=O)CCN1)C</chem>                                                                                                                                            | 661                     | Yes              |
| 1457                 | Tetrapetalone B                                            | <chem>CC(=O)O[C@H]([C@]12C=C(C)[C@H]3[C@]4(C(=CC(=O)C=C4[C@H]([C@@H]3C)O[C@H]3CC[C@H]([C(O3)C)O)N2C(=O)C(=C1O)C)O)C</chem>                                                                                                                 | 662                     | Yes              |
| 1458                 | Tetrapetalone A                                            | <chem>CC[C@]12C=C(C)[C@H]3[C@]4(C(=CC(=O)C=C4[C@H]([C@@H]3C)O[C@H]3CC[C@H]([C@H](O3)C)O)N2C(=O)C(=C1O)C)O</chem>                                                                                                                           | 662                     | No               |
| 1459                 | 2,18-seco-Lankacidinol A                                   | <chem>O[C@H]1/C=C/C=C/C(NC(=O)[C@@H](O)C)OC2=C(C)C(=O)O[C@H]([C@@H]([C=C/C=C/C/C1)/C)O)[C@H]2C/C</chem>                                                                                                                                    | 663                     | No               |

| Comp No <sup>a</sup> | Name                                 | SMILES <sup>b</sup>                                                                                                                                                                                                                              | Cluster No <sup>c</sup> | Rep <sup>d</sup> |
|----------------------|--------------------------------------|--------------------------------------------------------------------------------------------------------------------------------------------------------------------------------------------------------------------------------------------------|-------------------------|------------------|
| 1460                 | Lankacidinol                         | <chem>O[C@H]1/C=C/C(=C/[C@H](NC(=O)[C@H](O)C)[C@]2(C)C(=O)O[C@H](C[C@H](/C=C/C(=C/C1)/C)O)[C@H](C2=O)C)/C</chem>                                                                                                                                 | 663                     | No               |
| 1461                 | Lankacidin                           | <chem>O[C@H]1/C=C/C(=C/[C@H](NC(=O)C(=O)C)[C@]2(C)C(=O)O[C@H](C[C@H](/C=C/C(=C/C1)/C)O)[C@H](C2=O)C)/C</chem>                                                                                                                                    | 663                     | No               |
| 1462                 | iso-Lankacidinol                     | <chem>O[C@H]1/C=C/C(=C/[C@H](NC(=O)[C@H](O)C)[C@]2(C)C(=O)O[C@H](C[C@H](/C=C/C(=C/C1)/C)O)[C@H](C2=O)C)/C</chem>                                                                                                                                 | 663                     | Yes              |
| 1463                 | Lankacidinol A                       | <chem>O[C@H]1/C=C/C(=C/C(NC(=O)[C@H](O)C)[C@]2(C)C(=O)O[C@H](C[C@H](/C=C/C(=C/C1)/C)O[C@H](C2=O)C)/C</chem>                                                                                                                                      | 664                     | No               |
| 1464                 | Sedecamycin                          | <chem>OC1/C=C/C(=C/C(NC(=O)C(=O)C)C2(C)C(=O)OC(CC(=C/C(=C/C1)/C)OC(=O)C)C(C2=O)C)/C</chem>                                                                                                                                                       | 664                     | Yes              |
| 1465                 | Lankacidin C 14-propionate           | <chem>CCC(=O)OC1/C=C/C(=C/CC(O)/C=C/C(=C/C(C2(C(=O)OC(C1)C(C)C2=O)C)NC(=O)C(=O)C)/C)/C</chem>                                                                                                                                                    | 664                     | No               |
| 1466                 | O-beta-Kijanosyl-(1→17)-kijanolidide | <chem>COC(=O)N[C@H]1[C@H](C)O[C@H](C[C@]1(C)N(=O)=O)O[C@H]1C/C=C(C)/C[C@H]2C=C[C@H]3[C@H](C[C@]2(C)C(=O)C2=C([C@]4([C@H](/C=C/C1/C)C=C(CO)[C@H](C4)C)OC2=O)O)[C@H](C)C[C@H](C[C@H]3O)C</chem>                                                    | 665                     | Yes              |
| 1467                 | Phenelfamycin B                      | <chem>C/C=C/C=C/C1OC(O)(C(C(=O)NC/C=C/C(=C/C(C2OC(C2)O)/C=C/C=C/C(=O)O)C)OC)\C)COC2CC(OC)OC(C2O)C(C(C1(C)C)OC(=O)Cc1cccc1)O</chem>                                                                                                               | 666                     | No               |
| 1468                 | Phenelfamycin A                      | <chem>C/C=C/C=C/C1OC(O)(C(C(=O)NC/C=C/C(=C/C(C2OC(C2)O)/C=C/C=C/C(=O)O)C)OC)\C)COC2CC(OC)OC(C2O)C(C(C1(C)C)O)OC(=O)Cc1cccc1</chem>                                                                                                               | 666                     | No               |
| 1469                 | Unphenelfamycin                      | <chem>C/C=C/C=C/C1OC(O)(C(C(=O)NC/C=C/C(=C/C(C2OC(C2)O)/C=C/C=C/C(=O)O)C)OC)\C)COC2CC(OC)OC(C2O)C(C(C1(C)C)O)O</chem>                                                                                                                            | 666                     | Yes              |
| 1470                 | L 681217                             | <chem>C/C=C/C=C/C1OC(O)(CC(C1(C)O)O)C(C(=O)NC/C=C/C(=C/C(C1OC(C1)O)/C=C/C=C/C(=O)O)C)OC)\C)CC</chem>                                                                                                                                             | 666                     | No               |
| 1471                 | Demethyl-L-681,217                   | <chem>C/C=C/C=C/[C@H]1O[C@H](O)(C[C@H](C1(C)O)O)[C@H](C(=O)NC/C=C/C(=C/[C@H](C[C@H](C[C@H]1O[C@H](C[C@H](C1)O)/C=C/C=C/C(=O)O)C)OC)\C)C</chem>                                                                                                   | 666                     | No               |
| 1472                 | Phenelfamycin C                      | <chem>C/C=C/C=C/C1OC(O)(C(C(=O)NC/C=C/C(=C/C(C2OC(C2)O)/C=C/C=C/C(=O)O)C)OC)\C)COC2CC(OC)C(C(O2)C)OC2CC(OC)C(C(O2)C)O(C(C1(C)C)O)OC(=O)Cc1cccc1</chem>                                                                                           | 667                     | Yes              |
| 1473                 | Phenelfamycin E                      | <chem>C/C=C/C=C/[C@H]1O[C@H](O)(C(C(=O)NC/C=C/C(=C/[C@H](C2O[C@H](C[C@H](C2)O)/C=C/C=C/C(=O)O)C)OC)\C)CO[C@H]2C[C@H](OC)(C[C@H](O2)C)O[C@H]2C[C@H](OC)[C@H](C[C@H](O2)C)O[C@H]2C[C@H](OC)[C@H](C[C@H](O2)C)O[C@H](C1(C)C)O)OC(=O)Cc1cccc1</chem> | 668                     | Yes              |
| 1474                 | Phenelfamycin F                      | <chem>C/C=C/C=C/C1OC(O)(C(C(=O)NC/C=C/C(=C/C(C2OC(C2)O)/C=C/C=C/C(=O)O)C)OC)\C)COC2CC(OC)C(C(O2)C)OC2CC(OC)C(C(O2)C)OC2CC(OC)C(C(O2)C)O(C(C1(C)C)OC(=O)Cc1cccc1)O</chem>                                                                         | 669                     | Yes              |
| 1475                 | 9-DeoxoFK506                         | <chem>CCC[C@H]1/C=C(C)/C[C@H](C)C[C@H](OC)C2O[C@H](O)(CC(=O)N3C[C@H](C(=O)OC([C@H](C[C@H](CC1=O)O)C)/C(=C/[C@H]1CC[C@H](C[C@H](C1)OC)O)/C)CCC3)[C@H](C[C@H]2OC)C</chem>                                                                          | 670                     | Yes              |
| 1476                 | Tsukubamycin B                       | <chem>CCC[C@H]1/C=C(C)/C[C@H](C)C[C@H](OC)[C@H]2O[C@H](O)(C[C@H](C[C@H]2OC)C)C(=O)C(=O)N2[C@H](C(=O)O)[C@H](C[C@H](C[C@H](CC1=O)O)C)/C(=C/[C@H]1CC[C@H](C[C@H](C1)OC)O)/C)CCCC2</chem>                                                           | 671                     | No               |
| 1477                 | Tacrolimus                           | <chem>C=CC[C@H]1/C=C(C)/C[C@H](C)C[C@H](OC)[C@H]2O[C@H](O)(C[C@H](C[C@H]2OC)C)C(=O)C(=O)N2[C@H](C(=O)O)[C@H](C[C@H](C[C@H](CC1=O)O)C)/C(=C/[C@H]1CC[C@H](C[C@H](C1)OC)O)/C)CCCC2</chem>                                                          | 671                     | Yes              |
| 1478                 | 32-Dehydroxy-FK506                   | <chem>C=CC[C@H]1/C=C(C)/C[C@H](C)C[C@H](OC)[C@H]2O[C@H](O)(C[C@H](C[C@H]2OC)C)C(=O)C(=O)N2[C@H](C(=O)O)[C@H](C[C@H](C[C@H](CC1=O)O)C)/C(=C/[C@H]1CCC[C@H](C1)OC)/C)CCCC2</chem>                                                                  | 671                     | No               |
| 1479                 | 36-Methyl-Fk506                      | <chem>CO[C@H]1C[C@H](CC[C@H]1O)/C=C/[C@H]1OC(=O)[C@H]2CCCCN2C(=O)C(=O)[C@]2(O)O[C@H](C[C@H](C[C@H](C/C(=C/[C@H](C(=O)C[C@H](C[C@H]1)O)CC(=C)C)/C)OC)[C@H](C[C@H]2C)OC)\C</chem>                                                                  | 671                     | No               |
| 1480                 | 31-O-Demethyl-FK506                  | <chem>C=CCC1/C=C(C)/CC(OC)C2OC(O)(C(C2OC)C)C(=O)C(=O)N2C(C(=O)OC(C(C(C1=O)O)C)/C(=C/C1CCC(C(C1)O)O)/C)CCCC2</chem>                                                                                                                               | 671                     | No               |
| 1481                 | FK520                                | <chem>CC[C@H]1/C=C(C)/C[C@H](C)C[C@H](OC)[C@H]2O[C@H](O)(C[C@H](C[C@H]2OC)C)C(=O)C(=O)N2[C@H](C(=O)O)[C@H](C[C@H](C[C@H](CC1=O)O)C)/C(=C/[C@H]1CC[C@H](C[C@H](C1)OC)O)/C)CCCC2</chem>                                                            | 671                     | No               |
| 1482                 | 9-Deoxo-31-O-demethylFK506           | <chem>C[C@H]1C[C@H](C[C@H](C[C@H](C[C@H](O2)CC(=O)N3CCCC[C@H]3C(=O)O[C@H](C[C@H](C[C@H](C[C@H](CC(=O)[C@H](/C=C(C1)/C)CC(=O)C)/C(=C/[C@H]4CC[C@H](C[C@H](C4)O)O)/C)OC)OC</chem>                                                                  | 672                     | Yes              |
| 1483                 | 9-Hydroxy-31-O-demethylFK506         | <chem>C=CC[C@H]1/C=C(C)/C[C@H](C)C[C@H](OC)[C@H]2O[C@H](O)(C[C@H](C[C@H]2OC)C)C(=O)N2[C@H](C(=O)OC([C@H](C[C@H](CC1=O)O)C)/C(=C/[C@H]1CC[C@H](C[C@H](C1)O)O)/C)CCCC2)O</chem>                                                                    | 673                     | No               |
| 1484                 | FR900525                             | <chem>C=CC[C@H]1/C=C(C)/C[C@H](C)C[C@H](OC)[C@H]2O[C@H](O)(C[C@H](C[C@H]2OC)C)C(=O)C(=O)N2[C@H](C(=O)O)[C@H](C[C@H](C[C@H](CC1=O)O)C)/C(=C/[C@H]1CC[C@H](C[C@H](C1)OC)O)/C)CCCC2</chem>                                                          | 673                     | No               |
| 1485                 | 9-HydroxyFK506                       | <chem>C=CC[C@H]1/C=C(C)/C[C@H](C)C[C@H](OC)[C@H]2O[C@H](O)(C[C@H](C[C@H]2OC)C)C(=O)N2[C@H](C(=O)OC([C@H](C[C@H](CC1=O)O)C)/C(=C/[C@H]1CC[C@H](C(C1)OC)O)/C)CCC(C2)O</chem>                                                                       | 673                     | Yes              |



| Comp No <sup>a</sup> | Name                                          | SMILES <sup>b</sup>                                                                                                                                                                                                                                                                                               | Cluster No <sup>c</sup> | Rep <sup>d</sup> |
|----------------------|-----------------------------------------------|-------------------------------------------------------------------------------------------------------------------------------------------------------------------------------------------------------------------------------------------------------------------------------------------------------------------|-------------------------|------------------|
| 1513                 | Oligomycin F                                  | <chem>CCC(CC1OC2(CCC1C)OC1CC[C@H](CC)/C=C/C[C@H](C)[C@@H](O)[C@@](C)(O)C(=O)[C@H]([C@H]([C@H](C=O)[C@H]([C@H]([C@H]/C=C/C(=O)OC(C2C)[C@H]1C)C)O)C)O</chem>                                                                                                                                                        | 694                     | No               |
| 1514                 | Oligomycin                                    | <chem>CC[C@H]1/C=C/C=C/C[C@H](C)[C@@H](O)[C@](C)(O)C(=O)[C@H](C)[C@@H](O)C(C)C(=O)[C@@H]([C@@H]([C@H]([C@H]/C=C/C(=O)OC2C([C@H](CC1)O[C@@]1(CC[C@H]([C@H](O1)CC(O)C)C)[C@@H]2C)C)O)C</chem>                                                                                                                       | 694                     | Yes              |
| 1515                 | Oligomycin A                                  | <chem>CC[C@H]1/C=C/C=C/C[C@H](C)[C@@H](O)[C@](C)(O)C(=O)[C@H](C)[C@@H](O)[C@H](C)C(=O)[C@@H]([C@H]([C@H]([C@H]/C=C/C(=O)OC2[C@H](C(C1)O[C@@]1(CC[C@H]([C@H](O1)C[C@@H](O)C)C)[C@@H]2C)C)O)C</chem>                                                                                                                | 694                     | No               |
| 1516                 | Oligomycin SC-II                              | <chem>CCC1/C=C/C=C/CC(C)C(O)C(C)(O)C(=O)CC(O)C(C)C(C(C(C/C=C/C(=O)OC2C(C(C1)OC1(CCC(C(O1)CC(O)C)C)C2C)C)C)O)C</chem>                                                                                                                                                                                              | 695                     | Yes              |
| 1517                 | Oligomycin B                                  | <chem>CC[C@H]1/C=C/C=C/C[C@H](C)[C@@H](O)[C@](C)(O)C(=O)[C@H](C)[C@@H](O)[C@H](C)C(=O)[C@@H]([C@H]([C@H]([C@H]/C=C/C(=O)OC2[C@H](C(C1)O[C@@]1(O[C@H](C[C@H](O)C)[C@@H](CC1=O)C)[C@@H]2C)C)O)C</chem>                                                                                                              | 696                     | Yes              |
| 1518                 | Oligomycin E                                  | <chem>CC[C@H]1/C=C/C=C/C[C@H](C)[C@@H](O)[C@](C)(O)C(=O)[C@H](C)[C@@H](O)[C@H](C)C(=O)[C@@H]([C@H]([C@H]([C@H]/C=C/C(=O)O[C@@H]2[C@H]([C@H](CC1)O[C@@]1(O[C@H](C[C@H](O)C)[C@@H](CC1=O)C)[C@@H]2C)C)O)C</chem>                                                                                                    | 697                     | Yes              |
| 1519                 | 21-Hydroxy-oligomycin A                       | <chem>CC[C@H]1/C=C/C=C/C[C@H](C)[C@@H](O)[C@](C)(O)C(=O)[C@H](C)[C@@H](O)[C@H](C)C(=O)[C@@H]([C@H]([C@H]([C@H]/C=C/C(=O)O[C@@H]2[C@H]([C@H](C[C@H]1O)O[C@@]1(O[C@@H](C[C@H](O)C)[C@@H](CC1=O)C)[C@@H]2C)C)O)C</chem>                                                                                              | 697                     | No               |
| 1520                 | Rutamycin B                                   | <chem>CC[C@H]1/C=C/C=C/C[C@H](C)[C@@H](O)[C@](C)(O)C(=O)[C@H](C)[C@@H](O)[C@H](C)C(=O)[C@@H]([C@H]([C@H]([C@H]/C=C/C(=O)O[C@@H]2[C@H]([C@H](CC1)O[C@@]1(CC[C@H]([C@@H](O1)C[C@@H](O)C)C2C)C)O)C</chem>                                                                                                            | 698                     | Yes              |
| 1521                 | 44-Homooligomycin A                           | <chem>CCC1/C=C/C=C/CC(C)C(O)C(C)(O)C(=O)C(C)C(O)C(C)C(=O)C(C(C/C=C/C(=O)OC2C(C(C1)OC1(CCC(C(O1)CC(O)C)C)C2C)C)C)O)C</chem>                                                                                                                                                                                        | 698                     | No               |
| 1522                 | Oligomycin C                                  | <chem>CC[C@H]1/C=C/C=C/C[C@H](C)[C@@H](O)[C@](C)(O)C(=O)[C@H](C)[C@@H](O)[C@H](C)C(=O)[C@@H]([C@H]([C@H]([C@H]/C=C/C(=O)O[C@@H]2[C@H]([C@H](CC1)O[C@@]1(CC[C@H]([C@@H](O1)C[C@@H](O)C)C)[C@@H]2C)C)O)C</chem>                                                                                                     | 699                     | No               |
| 1523                 | Rutamycin A                                   | <chem>CC[C@H]1/C=C/C=C/C[C@H](C)[C@@H](O)[C@](C)(O)C(=O)[C@H](C)[C@@H](O)[C@H](C)C(=O)[C@@H]([C@H]([C@H]([C@H]/C=C/C(=O)O[C@@H]2[C@H]([C@H](CC1)O[C@@]1(CC[C@H]([C@@H](O1)C[C@@H](O)C)C2C)C)O)C</chem>                                                                                                            | 699                     | No               |
| 1524                 | Oligomycin D                                  | <chem>CC[C@H]1/C=C/C=C/C[C@H](C)[C@@H](O)[C@](C)(O)C(=O)[C@H](C)[C@@H](O)[C@H](C)C(=O)[C@@H]([C@H]([C@H]([C@H]/C=C/C(=O)OC2[C@H](C(C1)O[C@@]1(CC[C@H]([C@@H](O1)C[C@@H](O)C)C2C)C)O)C</chem>                                                                                                                      | 699                     | Yes              |
| 1525                 | 21-Hydroxyoligomycin C                        | <chem>CC[C@H]1/C=C/C=C/C[C@H](C)[C@@H](O)[C@H](C)C(=O)[C@H](C)[C@@H](O)[C@H](C)C(=O)[C@@H]([C@H]([C@H]([C@H]/C=C/C(=O)O[C@@H]2[C@H]([C@H](C[C@H]1O)O[C@@]1(O[C@@H](C[C@H](O)C)[C@@H](CC1=O)C)[C@@H]2C)C)O)C</chem>                                                                                                | 700                     | Yes              |
| 1526                 | 40-Hydroxy-oligomycin B                       | <chem>CC[C@H]1/C=C/C=C/C[C@H](C)[C@@H](O)[C@](C)(O)C(=O)[C@H](C)[C@@H](O)[C@H](C)C(=O)[C@@H]([C@H]([C@H]([C@H]/C=C/C(=O)O[C@@H]2[C@H]([C@H](CC1)O[C@@]1(O[C@@H](C[C@H](O)C)[C@@H](CC1=O)C)[C@@H]2C)C)O)C</chem>                                                                                                   | 701                     | Yes              |
| 1527                 | 44-Homooligomycin B                           | <chem>CC[C@H]1/C=C/C=C/C[C@H](C)[C@@H](O)[C@](C)(O)C(=O)[C@H](C)[C@@H](O)[C@H](C)C(=O)[C@@H]([C@H]([C@H]([C@H]/C=C/C(=O)OC2C(C(C1)O[C@@]1(O[C@@H](C[C@H](O)C)[C@@H](CC1=O)C)[C@@H]2CC)C)O)C</chem>                                                                                                                | 702                     | Yes              |
| 1528                 | Maclafungin                                   | <chem>OCCCC1C2OC(=O)/C=C/C(C(C(C)O)C(C)C)CC(OC)CC(C(C(C/C=C/C(=O)OC1OC1(C2)CCC(C(O1)CC(C(O)C)O)C)C)O)C</chem>                                                                                                                                                                                                     | 703                     | Yes              |
| 1529                 | JBIR-139                                      | <chem>CCC(C(C(C(C(C1C/C=C/C=C/C(O)CC(O)C(C)C)O)CC(OC2O[C@H](CO)[C@@H]([C@@H]([C@H]2NC(=O)C)O)C)C)C2CC(O)C(C)O2)(CC(C(CCC(C(C/C=C/C(=O)O1)O)O)C)O[C@@H]1O[C@H](C)[C@H]([C@@H]([C@H]1O[C@@H]1O[C@H](C)[C@H]([C@@H]([C@H]1O)O)O)O[C@@H]1C[C@@H](O)[C@@H]([C@H](O1)C)O)O)O)C)O)C)O[C@@H]1CC[C@@H]([C@H](O1)C)O</chem> | 704                     | Yes              |
| 1530                 | JBIR-129                                      | <chem>CCC(C(C(C(C(C1C/C=C/C=C/C(O)CC(O)C(C)C)O)CC(O)C(C)C2CC(O)C(C)O2)(CC(C(CCC(C(C/C=C/C(=O)O1)O)O)C)O[C@@H]1O[C@H](C)[C@H]([C@@H]([C@H]1O[C@@H]1O[C@H](C)[C@H]([C@@H]([C@H]1O)O)O)O)O)O)C)O)C)O[C@@H]1CC[C@@H]([C@H](O1)C)O</chem>                                                                              | 705                     | Yes              |
| 1531                 | CHEMBL3086647                                 | <chem>CC[C@H]1[C@@H](C)OC(=C[C@H]1O[C@H]1C[C@H](O)[C@@H]([C@@H](O1)C)O)[C@H]([C@@H]([C@@H]([C@H]1OC(=O)/C=C/C=C/[C@H](C)[C@@H](OC(=O)/C=C/C=C/[C@@H]1C)[C@H]([C@@H]([C@@H]([C@@]1(O)C[C@@H](O[C@H]2[C@H](O)[C@@H]([C@@H](O2)C)O)[C@@H]([C@@H](O1)C)CC)C)O)C)O)C</chem>                                            | 706                     | Yes              |
| 1532                 | 2,2'-Dimethyl-11,11'-O,O'-dimethylelaiophylin | <chem>CC[C@H]1[C@H](OC2C[C@H](O)[C@@H]([C@@H](O2)C)O)C[C@](O)[C@@H]1C(OC)[C@H]([C@@H]([C@@H]([C@H]1OC(=O)/C=C/C=C/[C@H](C)[C@@H](OC(=O)/C=C/C=C/[C@@H]1C)/C)[C@@H]([C@@H]([C@@H]([C@@H]([C@@H]1OC(C)C)O)C)C)O)C</chem>                                                                                            | 707                     | Yes              |
| 1533                 | 2-Methylelaiophylin                           | <chem>CC[C@H]1[C@H](O[C@H]2C[C@H](O)[C@@H]([C@@H](O2)C)O)C[C@](O)[C@@H]1C(O)[C@H]([C@@H]([C@@H]([C@H]1OC(=O)/C=C/C=C/[C@H](C)[C@@H](OC(=O)/C=C/C=C/[C@@H]1C)/C)[C@@H]([C@@H]([C@@H]([C@@H]([C@@H]1OC(C)C)O)C)C)O)C</chem>                                                                                         | 708                     | Yes              |

| Comp No <sup>a</sup> | Name                                                                                  | SMILES <sup>b</sup>                                                                                                                                                                                                                                                        | Cluster No <sup>c</sup> | Rep <sup>d</sup> |
|----------------------|---------------------------------------------------------------------------------------|----------------------------------------------------------------------------------------------------------------------------------------------------------------------------------------------------------------------------------------------------------------------------|-------------------------|------------------|
| 1534                 | 11,11'-O-Dimethyl-14'-deethyl-14'-methylelaiophylin                                   | <chem>CC[C@@H]1[C@H](O[C@H](C[C@H]1O[C@H]2C[C@H]([C@@H]([C@@H](O2)C)O)O)[C@@H](C)[C@@H]([C@H](C)[C@@H]3[C@H]([C@H]([C@@H]([C@@H](O3)C)[C@@H](C)[C@H]([C@H](C)[C@@H]4[C@H]([C@@H]([C@H](O4)C)O)[C@H]5C[C@H]([C@@H]([C@@H](O5)C)O)OC)O)C)O)C</chem>                          | 709                     | Yes              |
| 1535                 | 2,2'-Dimethylelaiophylin                                                              | <chem>CC[C@H]1[C@H](OC2C[C@H](O)[C@@H]([C@@H](O2)C)O)C[C@H](O[C@@H]1C)(O)[C@H]([C@@H]([C@@H]([C@H]1OC(=O)/C=C/C/[C@H](C)[C@H](OC(=O)/C=C/C/[C@@H]1C)/C)[C@H]([C@H]([C@@H]([C@@H]1(O)C)[C@@H](O[C@H]2C[C@H](O)[C@@H]([C@@H](O2)C)O)[C@@H]([C@H](O1)C)CC)C)O)C)O)C</chem>    | 710                     | Yes              |
| 1536                 | 2-Methyl-11,11'-O-dimethylelaiophylin                                                 | <chem>CC[C@H]1[C@H](O[C@H]2C[C@H](O)[C@@H]([C@@H](O2)C)O)C[C@H](O[C@@H]1C)(OC)[C@H]([C@@H]([C@@H]([C@H]1OC(=O)/C=C/C/[C@H](C)[C@H](OC(=O)/C=C/C/[C@@H]1C)/C)[C@H]([C@H]([C@@H]([C@@H]1(OC)C)[C@@H](OC2C[C@H](O)[C@@H]([C@@H](O2)C)O)[C@@H]([C@H](O1)C)CC)C)O)C)O)C</chem>  | 711                     | Yes              |
| 1537                 | 11,11'-O-Dimethylelaiophylin                                                          | <chem>CC[C@H]1[C@H](O[C@H]2C[C@H](C)[C@@H]([C@@H](O2)C)C)C[C@H](O[C@@H]1C)(OC)[C@H]([C@@H]([C@@H]([C@H]1OC(=O)/C=C/C/[C@H](C)[C@H](OC(=O)/C=C/C/[C@@H]1C)[C@H]([C@H]([C@@H]([C@@H]1(OC)C)[C@@H](O[C@H]2C[C@H](O)[C@@H]([C@@H](O2)C)O)[C@@H]([C@H](O1)C)CC)C)O)C)O)C</chem> | 712                     | Yes              |
| 1538                 | 11-O-Methylelaiophylin                                                                | <chem>CC[C@H]1[C@H](O[C@H]2C[C@H](O)[C@@H]([C@@H](O2)C)O)C[C@H](O[C@@H]1C)(O)[C@H]([C@@H]([C@@H]([C@H]1OC(=O)/C=C/C/[C@H](C)[C@H](OC(=O)/C=C/C/[C@@H]1C)[C@H]([C@H]([C@@H]([C@@H]1(OC)C)[C@@H](O[C@H]2C[C@H](O)[C@@H]([C@@H](O2)C)O)[C@@H]([C@H](O1)C)CC)C)O)C)O)C</chem>  | 713                     | Yes              |
| 1539                 | Efomycin G                                                                            | <chem>CC[C@H]1[C@H](O[C@H]2C[C@H](O)[C@@H]([C@@H](O2)C)O)C[C@H](O[C@@H]1C)(O)[C@H]([C@@H]([C@@H]([C@H]1OC(=O)/C=C/C/[C@H](C)[C@H](OC(=O)/C=C/C/[C@@H]1C)[C@H]([C@H]([C@@H]([C@@H]1(O)C)[C@@H](O[C@H]2C[C@H](O)[C@@H]([C@@H](O2)C)O)[C@@H]([C@H](O1)C)CC)C)O)C)O)C</chem>   | 714                     | Yes              |
| 1540                 | 11-O-Monomethylelaiophylin                                                            | <chem>CC[C@H]1[C@H](O[C@H]2C[C@H](O)[C@@H]([C@@H](O2)O)O)C[C@H](O[C@@H]1C)(O)[C@H]([C@@H]([C@@H]([C@H]1OC(=O)/C=C/C/[C@H](C)[C@H](OC(=O)/C=C/C/[C@@H]1C)[C@H]([C@H]([C@@H]([C@@H]1(OC)C)[C@@H](O[C@H]2C[C@H](O)[C@@H]([C@@H](O2)C)O)[C@@H]([C@H](O1)C)CC)C)O)C)O)C</chem>  | 715                     | Yes              |
| 1541                 | Efomycin A                                                                            | <chem>CCC1C(OC2CC(O)C(C(O2)C)O)CC(OC1C)(O)[C@H]([C@@H]([C@@H]([C@H]1OC(=O)/C=C/C/[C@H](C)[C@H](OC(=O)/C=C/C/[C@@H]1C)[C@H]([C@H]([C@@H](C1)O)CC(OC2CC(OC)C(C(O2)C)O)C(O1)C)CC)C)O)C)O)C</chem>                                                                             | 716                     | Yes              |
| 1542                 | Halichoblelide D                                                                      | <chem>CC[C@H]1[C@H](O[C@H]2C[C@H](O)[C@@H]([C@@H](O2)C)O)C[C@H](O[C@@H]1C)(O)[C@H]([C@@H]([C@@H]([C@H]1OC(=O)/C=C/C/[C@H](C)[C@H](OC(=O)/C=C/C/[C@@H]1C)[C@H]([C@H]([C@@H]([C@@H]1(O)C)[C@@H](OC)[C@@H]([C@H](O1)C)CC)C)O)C)O)C</chem>                                     | 717                     | Yes              |
| 1543                 | Elaiophylin                                                                           | <chem>CC[C@H]1[C@H](O[C@H]2C[C@H](O)[C@@H]([C@@H](O2)C)O)C[C@H](O[C@@H]1C)(O)[C@H]([C@@H]([C@@H]([C@H]1OC(=O)/C=C/C/[C@H](C)[C@H](OC(=O)/C=C/C/[C@@H]1C)[C@H]([C@H]([C@@H]([C@@H]1(O)C)[C@@H](O[C@H]2C[C@H](O)[C@@H]([C@@H](O2)C)O)[C@@H]([C@H](O1)C)CC)C)O)C)O)C</chem>   | 718                     | Yes              |
| 1544                 | Albonoursin                                                                           | <chem>CC(/C=c/1\[nH]c(=O)/c(=C/c2ccccc2)/[nH]c1=O)C</chem>                                                                                                                                                                                                                 | 719                     | No               |
| 1545                 | (3Z,6S)-3-Benzylidene-6-(2S-but-2-yl)piperazine-2,5-dione                             | <chem>CC[C@@H]([C@@H]1NC(=O)/C(=C/c2ccccc2)/NC1=O)C</chem>                                                                                                                                                                                                                 | 719                     | No               |
| 1546                 | (6R,3Z)-3-benzylidene-6-isobutyl-1-methylpiperazine-2,5-dione                         | <chem>CC(C[C@@H]1C(=O)N/C(=C/c2ccccc2)/C(=O)N1C)C</chem>                                                                                                                                                                                                                   | 719                     | No               |
| 1547                 | (3E,6E)-3-Benzylidene-1-methyl-6-(2-methylpropylidene)piperazine-2,5-dione            | <chem>CC(/C=c/1\[nH]c(=O)/c(=C/c2ccccc2)/c(=O)n1C)C</chem>                                                                                                                                                                                                                 | 719                     | No               |
| 1548                 | (3Z,6E)-3-(4-Hydroxybenzylidene)-1-methyl-6-(2-methylpropylidene)piperazine-2,5-dione | <chem>CC(C=c1c(=O)[nH]c(=C/c2ccccc2)/c(=O)n1C)C</chem>                                                                                                                                                                                                                     | 719                     | No               |
| 1549                 | 1-N-Methylalbonoursin                                                                 | <chem>CC(/C=c/1\[nH]c(=O)/c(=C/c2ccccc2)/c(=O)n1C)C</chem>                                                                                                                                                                                                                 | 719                     | Yes              |
| 1550                 | (3E,6Z)-6-Benzylidene-1-methyl-3-(2-methylpropylidene)piperazine-2,5-dione            | <chem>CC(/C=c\1/[nH]c(=O)/c(=C/c2ccccc2)/n(c1=O)C)C</chem>                                                                                                                                                                                                                 | 719                     | No               |
| 1551                 | (3Z,6E)-1-N-Methyl-3-benzylidene-6-(methyl-3-hydroxypropylidene)piperazine-2,5-dione  | <chem>CC(C/C=c/1\[nH]c(=O)/c(=C/c2ccccc2)/c(=O)n1C)O</chem>                                                                                                                                                                                                                | 720                     | Yes              |



| Comp No <sup>a</sup> | Name                                        | SMILES <sup>b</sup>                                                                                                                    | Cluster No <sup>c</sup> | Rep <sup>d</sup> |
|----------------------|---------------------------------------------|----------------------------------------------------------------------------------------------------------------------------------------|-------------------------|------------------|
| 1552                 | Tryptophan-dehydrobutyrine diketopiperazine | <chem>C/C=C/1\NC(=O)C(N(C1=O)C)Cc1c[nH]c2c1cccc2</chem>                                                                                | 721                     | Yes              |
| 1553                 | Jadomycin hydroxy-4AMBA                     | <chem>Cc1cc(O)c2c(c1)[C@H](O)N(C1=C2C(=O)c2cccc(c2C1=O)O)[C@H]1C[C@@H](O)[C@H]([C@@H](O1)C)O)Cc1ccc(cc1)C(=O)O</chem>                  | 722                     | No               |
| 1554                 | 3a-O-Methyljadomycin 4AMBA                  | <chem>CO[C@H]1N(Cc2ccc(cc2)C(=O)O)C2=C(c3c1cc(C)cc3O)C(=O)c1c(C2=O)c(ccc1)O[C@H]1C[C@@H](O)[C@H]([C@@H](O1)C)O</chem>                  | 722                     | No               |
| 1555                 | 3a-O-Methyljadomycin 3AMBA                  | <chem>CO[C@H]1N(Cc2cccc(c2)C(=O)O)C2=C(c3c1cc(C)cc3O)C(=O)c1c(C2=O)c(ccc1)O[C@H]1C[C@@H](O)[C@H]([C@@H](O1)C)O</chem>                  | 722                     | No               |
| 1556                 | Jadomycin acetate-3AMBA                     | <chem>OC(=O)C[C@H]1N(Cc2cccc(c2)C(=O)O)C2=C(c3c1cc(C)cc3O)C(=O)c1c(C2=O)c(ccc1)O[C@H]1C[C@@H](O)[C@H]([C@@H](O1)C)O</chem>             | 722                     | No               |
| 1557                 | Jadomycin acetate-4AMBA                     | <chem>OC(=O)C[C@H]1N(Cc2ccc(cc2)C(=O)O)C2=C(c3c1cc(C)cc3O)C(=O)c1c(C2=O)c(ccc1)O[C@H]1C[C@@H](O)[C@H]([C@@H](O1)C)O</chem>             | 722                     | No               |
| 1558                 | Jadomycin pyruvate-4AMBA                    | <chem>Cc1cc(O)c2c(c1)[C@H](CC(=O)C(=O)N(C1=C2C(=O)c2cccc(c2C1=O)O)[C@H]1C[C@@H](O)[C@H]([C@@H](O1)C)O)Cc1ccc(cc1)C(=O)O</chem>         | 722                     | No               |
| 1559                 | Jadomycin DNV                               | <chem>CCC[C@H]1C(=O)OC2N1C1=C(C(=O)c3c(C1=O)c(ccc3)OC1CC(O)C(C(O1)C)O)c1c2cc(cc1O)C</chem>                                             | 722                     | No               |
| 1560                 | D-Olivosyl-jadomycin-His                    | <chem>Cc1cc(O)c2c(c1)C1OC(=O)[C@H](N1C1=C2C(=O)c2cccc(c2C1=O)OC1CC(O)C(C(O1)C)O)CCc1[nH]cnc1</chem>                                    | 722                     | No               |
| 1561                 | Jadomycin SPhG                              | <chem>Cc1cc(O)c2c(c1)C1OC(=O)[C@H](N1C1=C2C(=O)c2cccc(c2C1=O)OC1CC(O)C(C(O1)C)O)c1ccc(cc1)</chem>                                      | 722                     | No               |
| 1562                 | 4-Keto-6-deoxy-D-glucosyl-jadomycin A       | <chem>CCC(C[C@H]1C(=O)OC2N1C1=C(C(=O)c3c(C1=O)c(ccc3)OC1OC(C)C(=O)C(C1O)O)c1c2cc(cc1O)C)C</chem>                                       | 722                     | No               |
| 1563                 | Jadomycin TFAL                              | <chem>Cc1cc(O)c2c(c1)C1OC(=O)[C@H](N1C1=C2C(=O)c2c(C1=O)c(ccc2)O[C@H]1C[C@@H](O)[C@H]([C@@H](O1)C)O)CCCCNC(=O)C(F)(F)F</chem>          | 722                     | No               |
| 1564                 | D-Olivosyl-jadomycin A                      | <chem>CCC(C[C@H]1C(=O)OC2N1C1=C(C(=O)c3c(C1=O)c(ccc3)OC1CC(O)C(C(O1)C)O)c1c2cc(cc1O)C)C</chem>                                         | 722                     | No               |
| 1565                 | Jadomycin L                                 | <chem>CC(C[C@H]1C(=O)OC2N1C1=C(C(=O)c3c(C1=O)c(ccc3)O[C@H]1C[C@@H](O)[C@H]([C@@H](O1)C)O)c1c2cc(cc1O)C)C</chem>                        | 722                     | No               |
| 1566                 | 6-Deoxy-D-glucosyl-jadomycin A              | <chem>CCC(C[C@H]1C(=O)OC2N1C1=C(C(=O)c3c(C1=O)c(ccc3)OC1OC(C)C(C(C1O)O)O)c1c2cc(cc1O)C)C</chem>                                        | 722                     | No               |
| 1567                 | Jadomycin B                                 | <chem>CC[C@H]([C@H]1C(=O)O[C@H]2N1C1=C(C(=O)c3c(C1=O)c(ccc3)O[C@H]1C[C@@H](O)[C@H]([C@@H](O1)C)O)c1c2cc(cc1O)C)C</chem>                | 722                     | No               |
| 1568                 | D-Olivosyl-jadomycin-Trp                    | <chem>Cc1cc(O)c2c(c1)C1OC(=O)[C@H](N1C1=C2C(=O)c2c(C1=O)c(ccc2)OC1CC(O)C(C(O1)C)O)CCc1c[nH]c2c1cccc2</chem>                            | 722                     | No               |
| 1569                 | D-Olivosyl-jadomycin-Leu                    | <chem>CC(CC[C@H]1C(=O)OC2N1C1=C(C(=O)c3c(C1=O)c(ccc3)OC1CC(O)C(C(O1)C)O)c1c2cc(cc1O)C)C</chem>                                         | 722                     | Yes              |
| 1570                 | D-Olivosyl-jadomycin-Met                    | <chem>CSCCC[C@H]1C(=O)OC2N1C1=C(C(=O)c3c(C1=O)c(ccc3)OC1CC(O)C(C(O1)C)O)c1c2cc(cc1O)C</chem>                                           | 722                     | No               |
| 1571                 | D-Olivosyl-jadomycin-Phe                    | <chem>Cc1cc(O)c2c(c1)C1OC(=O)[C@H](N1C1=C2C(=O)c2cccc(c2C1=O)OC1CC(O)C(C(O1)C)O)CCc1cccc1</chem>                                       | 722                     | No               |
| 1572                 | D-Olivosyl-jadomycin-Tyr                    | <chem>Cc1cc(O)c2c(c1)C1OC(=O)[C@H](N1C1=C2C(=O)c2c(C1=O)c(ccc2)OC1CC(O)C(C(O1)C)O)CCc1ccc(cc1)O</chem>                                 | 722                     | No               |
| 1573                 | Jadomycin F                                 | <chem>Cc1cc(O)c2c(c1)[C@@H]1OC(=O)[C@@H](N1C1=C2C(=O)c2cccc(c2C1=O)O)[C@H]1C[C@@H](O)[C@H]([C@@H](O1)C)O)Cc1cccc1</chem>               | 722                     | No               |
| 1574                 | D-Olivosyl-jadomycin-Val                    | <chem>CC(C[C@H]1C(=O)OC2N1C1=C(C(=O)c3c(C1=O)c(ccc3)OC1CC(O)C(C(O1)C)O)c1c2cc(cc1O)C)C</chem>                                          | 722                     | No               |
| 1575                 | 2,6-Dideoxy-L-erythro-4-hexulosyl-jadomycin | <chem>CCC(C[C@H]1C(=O)OC2N1C1=C(C(=O)c3c(C1=O)c(ccc3)OC1CC(O)C(=O)C(O1)C)c1c2cc(cc1O)C)C</chem>                                        | 722                     | No               |
| 1576                 | Jadomycin 3AMBA-lactam                      | <chem>Cc1cc(O)c2c(c1)c(=O)n(c1c2C(=O)c2cccc(c2C1=O)O)[C@H]1C[C@@H](O)[C@H]([C@@H](O1)C)O)Cc1cccc(c1)C(=O)O</chem>                      | 722                     | No               |
| 1577                 | Jadomycin 4AMBA-lactam                      | <chem>Cc1cc(O)c2c(c1)c(=O)n(c1c2C(=O)c2cccc(c2C1=O)O)[C@H]1C[C@@H](O)[C@H]([C@@H](O1)C)O)Cc1ccc(cc1)C(=O)O</chem>                      | 722                     | No               |
| 1578                 | Jadomycin TFAL lactam                       | <chem>Cc1cc(O)c2c(c1)c(=O)n(c1c2C(=O)c2cccc(c2C1=O)O)[C@H]1C[C@@H](O)[C@H]([C@@H](O1)C)O)[C@H]([C@@H](O1)C)O)CCCCNC(=O)C(F)(F)F</chem> | 722                     | No               |
| 1579                 | Jadomycin A                                 | <chem>CC[C@H]([C@H]1C(=O)O[C@H]2N1C1=C(c3c2cc(C)cc3O)C(=O)c2c(C1=O)c(O)ccc2)C</chem>                                                   | 723                     | Yes              |
| 1580                 | Jadomycin                                   | <chem>CCC([C@H]1C(=O)O[C@H]2N1C1=C(c3c2cc(C)cc3O)C(=O)c2c(C1=O)c(O)ccc2)C</chem>                                                       | 723                     | No               |
| 1581                 | Ellagic acid                                | <chem>Oc1cc2c(=O)oc3c4c2c(c1O)oc(=O)c4cc(c3O)O</chem>                                                                                  | 724                     | Yes              |
| 1582                 | Defucogilvocarcin V                         | <chem>COc1cc(C=C)cc2c1c1cc(OC)c3c(c1oc2=O)cccc3O</chem>                                                                                | 725                     | Yes              |
| 1583                 | 2-(2-Methyl-4-oxochromen-5-yl)acetic acid   | <chem>OC(=O)Cc1cccc2c1c(=O)cc(o2)C</chem>                                                                                              | 726                     | Yes              |
| 1584                 | Phaeochromycin E                            | <chem>CCCC1cc(=O)c2c(o1)cccc2CC(=O)O</chem>                                                                                            | 726                     | No               |

| Comp No <sup>a</sup> | Name                                                        | SMILES <sup>b</sup>                                                                                                                                                                                                                       | Cluster No <sup>c</sup> | Rep <sup>d</sup> |
|----------------------|-------------------------------------------------------------|-------------------------------------------------------------------------------------------------------------------------------------------------------------------------------------------------------------------------------------------|-------------------------|------------------|
| 1585                 | Phaeochromycin I                                            | O[C@@H](CC(=O)O)CC(=O)Cc1cccc2c1c(=O)cc(o2)C                                                                                                                                                                                              | 727                     | Yes              |
| 1586                 | Phaeochromycin H                                            | CC(CC(=O)Cc1cccc2c1c(=O)cc(o2)C)O                                                                                                                                                                                                         | 727                     | No               |
| 1587                 | 23-Valine demalonylazalomycin F5a ester                     | CN/C(=N/C)/NCCC/C=C/CCC[C@@H]([C@@H]1OC(=O)/C(=C/C=C/[C@H](C)[C@@H](O)C[C@H](O)[C@H](C)[C@H](O)CC[C@H](C)[C@@H](O)C[C@]2(O[C@@H](C[C@H](C)[C@@H](C)[C@H](C)[C@@H](C)/C(=C/C=C/[C@H]1C)/C)O)O)OC(=O)C(C(C)C)N)C[C@@H](O)[C@@H]2O)/C)C      | 728                     | Yes              |
| 1588                 | 23-(9-Methyl)decanoic acid demalonylazalomycin F4a ester    | CN/C(=N/C)/NCCC/C=C/CCC[C@@H]([C@@H]1OC(=O)/C(=C/C=C/[C@H](C)[C@@H](O)C[C@H](O)[C@H](C)[C@H](O)CC[C@H](C)[C@@H](O)C[C@]2(O[C@@H](C[C@H](C)[C@@H](C)[C@H](C)[C@@H](C)/C(=C/C=C/[C@H]1C)/C)O)O)OC(=O)CCCCCCCC(C)C[C@@H](O)[C@@H]2O)/C)C     | 729                     | Yes              |
| 1589                 | Kanchanamycin C                                             | OC1CC(O)CC(OC(=O)CC(=O)O)CC2CC(O)C(C(O2)(O)CC(O)C(C)CCC(O)C(C)C(O)CC(C/C(=C/C=C/C/C(=O)OC(C/C=C/C=C/C(C1)O)C)C)C(CCC/C=C/C/CCCN=C(N)N)C)C)O                                                                                               | 730                     | Yes              |
| 1590                 | 23-(6-Methyl)heptanoic acid demalonylazalomycin F4a ester   | C/N=C/(NCCC/C=C/CCC[C@@H]([C@@H]1OC(=O)/C(=C/C=C/[C@H](C)[C@@H](O)C[C@H](O)[C@H](C)[C@H](O)CC[C@H](C)[C@@H](O)C[C@]2(O[C@@H](C[C@H](C)[C@@H](C)[C@H](C)[C@@H](C)/C(=C/C=C/[C@H]1C)/C)O)O)OC(=O)CCCC(C)C[C@@H](O)[C@@H]2O)/C)C)N           | 731                     | Yes              |
| 1591                 | Neocopiamycin A                                             | CC(CC(C1OC(=O)/C=C/C(C)C(O)CC(O)C(C)C(O)CCC(C)C(O)CC2(OC(CC(CC(CC(C(C/C(=C/C1C)O)C)O)O)OC(=O)CC(=O)O)CC(O)C2O)O)C)CCC/C=C/CCCN=C(N)N                                                                                                      | 732                     | Yes              |
| 1592                 | Azalomycin F4a                                              | CN=C(NCCC/C=C/CCC[C@@H]([C@@H]1OC(=O)/C(=C/C=C/[C@H](C)[C@@H](O)C[C@H](O)[C@@H](C)[C@H](O)CC[C@H](C)[C@@H](O)C[C@]2(O[C@@H](C[C@H](C)[C@@H](C)[C@H](C)[C@@H](C)/C(=C/C=C/[C@H]1C)/C)O)O)OC(=O)CC(=O)O)C[C@@H](O)[C@@H]2O)/C)C)N           | 733                     | Yes              |
| 1593                 | Shurimycin B                                                | CN/C(=N/C)/NCCC/C=C/CCCC(C1OC(=O)/C(=C/C=C/C(C)C(O)CC(O)C(C)C(O)CCC(C)C(O)CC2(OC(CC(CC(CC(C(C/C(=C/C=C/C1C)C)O)O)O)OC(=O)CC(=O)O)CC(O)C2O)O)C                                                                                             | 734                     | Yes              |
| 1594                 | Azalomycin F                                                | OC1CC(O)CC(OC(=O)CC(=O)O)CC2CC(O)C(C(O2)(O)CC(O)C(C)CCC(O)C(C)C(O)CC(C/C(=C/C=C/C/C(=O)OC(C/C=C/C=C/C(C1)O)C)C)C(CCC/C=C/C/CCCN=C(N)N)C)C)O                                                                                               | 735                     | Yes              |
| 1595                 | Azalomycin RS-22A                                           | OC1CC(O)CC(OC(=O)CC(=O)O)CC2CC(O)C(C(O2)(O)CC(O)C(C)CCC(O)C(C)C(O)CC(C/C(=C/C=C/C/C(=O)OC(C/C=C/C=C/C(C1)O)C)C)C(CCC/C=C/C/CCCN=C(N)N)C)C)O                                                                                               | 736                     | Yes              |
| 1596                 | Kanchanamycin A                                             | OC1CC(O)CC(OC(=O)CC(=O)O)CC2CC(O)C(C(O2)(O)CC(O)C(C)CCC(O)C(C)C(O)CC(C/C(=C/C=C/C/C(=O)OC(C/C=C/C=C/C(C1)O)C)C)C(CCC/C=C/C/CCCN=C(N)N)C)C)O                                                                                               | 737                     | Yes              |
| 1597                 | Rs-22C                                                      | CN/C(=N/C)/NCCC/C=C/CCCC(C1OC(=O)/C(=C/C=C/C(C)C(O)CC(O)C(C)C(O)CCC(C)C(O)CC2(OC(CC(CC(CC(C(C/C(=C/C=C/C1C)C)O)O)O)OC(=O)CC(=O)O)CC(O)C2O)O)C                                                                                             | 738                     | Yes              |
| 1598                 | Azalomycin F4                                               | C/N=C/(NCCC/C=C/CCCC(C1OC(=O)/C(=C/C=C/C(C)C(O)CC(O)C(C)C(O)CCC(C)C(O)CC2(OC(CC(CC(CC(CC(C(C/C(=C/C=C/C1C)C)O)O)OC(=O)CC(=O)O)CC(O)C2O)O)C)C)N                                                                                            | 739                     | Yes              |
| 1599                 | RS-22 B                                                     | C/N=C/(NCCC/C=C/CCCC(C1OC(=O)/C(=C/C=C/C(C)C(O)CC(O)C(C)C(O)CCC(C)C(O)CC2(OC(CC(CC(CC(CC(C(C/C(=C/C=C/C1C)C)O)O)O)OC(=O)CC(=O)O)CC(O)C2O)O)C)N                                                                                            | 740                     | Yes              |
| 1600                 | 23-(6-Methyl)heptanoic acid demalonylazalomycin F3a ester   | CC(CCCCC(=O)O[C@@H]1C[C@H](O)C[C@H](O)C[C@H](O)C/C(=C/C=C/[C@H](C)[C@@H](OC(=O)/C(=C/C=C/[C@H]([C@H](C)[C@H]([C@@H]([C@@H](CC[C@H]([C@H](C)[C@]2(O[C@@H](C1)C[C@@H](O)[C@@H]2O)O)C)O)C)C)C[C@H](CCC/C=C/CCCN=C(N)N)C)/C)C                 | 741                     | Yes              |
| 1601                 | UNII-ZUD60NKS1C                                             | O[C@@H]1C[C@H](O)C[C@H](OC(=O)CC(=O)O)C[C@H]2C[C@@H](O)[C@@H]([C@@](O2)(O)C[C@H](O)[C@@H](C)CC[C@H](O)[C@H](C)[C@@H](O)C[C@@H]([C@H](C/C=C/C/C(=O)O[C@H]([C@@H](C/C=C/C/[C@H](C1)O)C)C)[C@H](CCC/C=C/C/CCCN=C(N)N)C)C)O)O                 | 742                     | Yes              |
| 1602                 | Kanchanamycin D                                             | COC12OC(CC(CC(O)CC(O)C/C(=C/C=C/C(C)C(OC(=O)/C(=C/C=C/C(C)CC(C(C)CCC(C(C1)O)C)O)C)O)C)C(CCC/C=C/C/CCCN=C(N)N)C)C)OC(=O)CC(=O)O)CC(C2O)O                                                                                                   | 743                     | Yes              |
| 1603                 | 23-(10-Methyl)undecanoic acid demalonylazalomycin F4a ester | CN/C(=N/C)/NCCC/C=C/CCC[C@@H]([C@@H]1OC(=O)/C(=C/C=C/[C@H](C)[C@@H](O)C[C@@H](O)[C@H](C)[C@H](O)CC[C@H](C)[C@@H](O)C[C@]2(O[C@@H](C[C@H](C)[C@@H](C)[C@H](C)[C@@H](C)/C(=C/C=C/[C@H]1C)/C)O)O)OC(=O)CCCCCCCC(C)C[C@@H](O)[C@@H]2O)/C)C    | 744                     | Yes              |
| 1604                 | 23-(6-Methyl)heptanoic acid demalonylazalomycin F5a ester   | CN/C(=N/C)/NCCC/C=C/CCC[C@@H]([C@@H]1OC(=O)/C(=C/C=C/[C@H](C)[C@@H](O)C[C@@H](O)[C@H](C)[C@H](O)CC[C@H](C)[C@@H](O)C[C@]2(O[C@@H](C[C@H](C)[C@@H](C)[C@H](C)[C@@H](C)/C(=C/C=C/[C@H]1C)/C)O)O)OC(=O)CCCC(C)C[C@@H](O)[C@@H]2O)/C)C        | 745                     | Yes              |
| 1605                 | Copiamycin                                                  | C/N=C/(NCCC/C=C/CCCC(CC(C1OC(=O)/C(=C/C(C)C(O)CC(O)C(C)C(O)CCC(C)C(O)CC2(OC(CC(CC(CC(C(C/C(=C/C1C)O)C)O)O)OC(=O)CC(=O)O)CC(O)C2O)O)C)C)N                                                                                                  | 746                     | Yes              |
| 1606                 | UNII-H7Q3DUM9N6                                             | CNC(=N/C)/NCCC/C=C/CCC[C@@H]([C@@H]1OC(=O)/C(=C/C=C/[C@H](C)[C@@H](O)C[C@H](O)[C@@H](C)[C@H](O)CC[C@H](C)[C@@H](O)C[C@]2(O[C@@H](C[C@H](C)[C@@H](C)[C@H](C)[C@@H](C)/C(=C/C=C/[C@H]1C)/C)O)O)OC(=O)CC(=O)O)C[C@@H](O)[C@@H]2O)/C)C        | 747                     | Yes              |
| 1607                 | Malolactomycin C                                            | C/N=C/(NCCCCC/C=C/CC(C1OC(=O)C(C)C(O)/C(=C/C(C)C(C)C(O)CC(O)C(C)C(O)CCC(C)C(O)CC2(OC(CC(CC(CC(CC(C(C/C(=C/C=C/C1C)O)C)O)O)O)OC(=O)CC(=O)O)CC(O)C2O)O)C)C)\N                                                                               | 748                     | Yes              |
| 1608                 | Niphimycin                                                  | C/N=C/(NCCC/C=C/CCC[C@@H](C[C@@H](C1OC(=O)C(C)C(O)/C(=C/C(C)C(O)CC(O)C(C)C(O)C(C)C(O)CC2(OC(CC(CC(CC(C(C/C(=C/C=C/C1C)O)C)O)O)OC(=O)CC(=O)O)CC(O)C2O)O)C)\N                                                                               | 749                     | Yes              |
| 1609                 | 17-O-Methylniphimycin                                       | CN=C(NCCC/C=C/CCC[C@@H](C[C@@H](C1OC(=O)[C@H](C)[C@H](O)/C=C/[C@H](C)[C@H](O)C[C@H](O)[C@H](C)[C@@H](O)CC[C@H](C)[C@@H](O)C[C@]2(O[C@@H](C[C@H](C)[C@@H](C)[C@H](C)[C@@H](C)/C(=C/C=C/[C@H]1C)/C)O)O)OC(=O)CCCC(C)C[C@@H](O)[C@@H]2O)/C)C | 750                     | Yes              |

| Comp No <sup>a</sup> | Name                                                                                                                                                     | SMILES <sup>b</sup>                                                                                                                                                                                                                                            | Cluster No <sup>c</sup> | Rep <sup>d</sup> |
|----------------------|----------------------------------------------------------------------------------------------------------------------------------------------------------|----------------------------------------------------------------------------------------------------------------------------------------------------------------------------------------------------------------------------------------------------------------|-------------------------|------------------|
|                      |                                                                                                                                                          | H[C@H]([C@@H]([C@H]/C=C/C=C/[C@@H]1C)O)C)O)OC(=O)CC(=O)O)C[C@H](O)[C@H]2O)OC)C)N                                                                                                                                                                               |                         |                  |
| 1610                 | 19-O-Malonylniphimycin                                                                                                                                   | CN=C(NCCC/C=C/CCCC(CC(C1OC(=O)C)C(O)CCC(C)C(O)C(C)C(O)CCCC(O)CC2(OC(CC(CC(CC(C(C/C=C/C=C1C)O)C)O)O)OC(=O)CC(=O)O)CC(OC(=O)CC(=O)O)C2O)O)C)C)N                                                                                                                  | 751                     | Yes              |
| 1611                 | Guanidylfungin A                                                                                                                                         | CN=C(NCCCC/C=C/CC(C1OC(=O)C)C(O)/C=C/C(C)C(O)CC(O)C(C)C(O)CCC(C)C(O)CC2(OC(CC(CC(CC(C(C/C=C/CCC1C)C)O)C)O)O)OC(=O)CC(=O)O)CC(O)C2O)O)C)N                                                                                                                       | 752                     | Yes              |
| 1612                 | Niphimycin C                                                                                                                                             | CN=C(NCCC/C=C/CCC[C@@H](C[C@@H]([C@H]1OC(=O)[C@H](C)[C@H](O)/C=C/[C@H](C)[C@H](O)C[C@H](O)[C@H](C)[C@@H](O)CC[C@H](C)[C@H](O)C[C@@]2(O)[C@H](C[C@H](C[C@@H](C[C@H]([C@H]([C@H]([C@H]/C=C/C=C/[C@@H]1C)O)C)O)OC(=O)CC(=O)O)O)C[C@H](O)[C@H]2O)O)C)N             | 753                     | Yes              |
| 1613                 | Niphimycin D                                                                                                                                             | CN=C(NCCC/C=C/CCC[C@@H](C[C@@H]([C@H]1OC(=O)[C@H](C)[C@H](O)/C=C/[C@H](C)[C@H](O)C[C@H](O)[C@H](C)[C@@H](O)CC[C@H](C)[C@H](O)C[C@@]2(O)[C@H](C[C@H](C[C@@H](C[C@H]([C@H]([C@H]([C@H]/C=C/C=C/[C@@H]1C)O)C)O)OC(=O)CC(=O)O)O)C[C@H](OC(=O)CC(=O)O)[C@H]2O)O)C)N | 754                     | Yes              |
| 1614                 | Niphimycin E                                                                                                                                             | CN=C(NCCC/C=C/CCC[C@@H](C[C@@H]([C@H]1OC(=O)[C@H](C)[C@H](O)/C=C/[C@H](C)[C@H](O)C[C@H](O)[C@H](C)[C@@H](O)CC[C@H](C)[C@H](OC(=O)CC(=O)O)C[C@@]2(O)[C@H](C[C@H](C[C@@H](C[C@H]([C@H]([C@H]([C@H]/C=C/C=C/[C@@H]1C)O)C)O)O)OC(=O)CC(=O)O)C[C@H](O)[C@H]2O)O)C)N | 755                     | Yes              |
| 1615                 | Guanidylfungin B                                                                                                                                         | OC(=O)CC(=O)OC1/C=C/C(C)C(O)CC(O)C(C)C(O)CCC(C)C(O)CC2(O)OC(CC(CC(CC(C(C/C=C/C)CC(C(OC(=O)C1C)C(C/C=C/CCCCCN=C(N)N)/C)C)C)C)O)O)O)CC(C2O)O                                                                                                                     | 756                     | Yes              |
| 1616                 | Methyl guanidylfungin A                                                                                                                                  | CN=C(NCCCC/C=C/CC(C1OC(=O)C)C(O)/C=C/C(C)C(O)CC(O)C(C)C(O)CCC(C)C(O)CC2(OC(CC(CC(CC(C(C/C=C/CCC1C)C)O)C)O)O)OC(=O)CC(=O)O)CC(O)C2O)OC)C)N                                                                                                                      | 757                     | Yes              |
| 1617                 | Malolactomycin D                                                                                                                                         | OC1CC(OC(=O)CC(=O)O)CC2CC(O)C(C(O2)(O)CC(O)C(C)CCC(O)C(C)C(O)CC(O)C/C=C/C(C)C(C(=O)OC(C/C=C/C=C1C)C)C(C(C(C(C(C(C1)O)O)C)O)C)C(C/C=C/CCCCCN=C(N)N)/C)C)O)C)O                                                                                                   | 758                     | Yes              |
| 1618                 | Malolactomycin A                                                                                                                                         | CN/C(=N)C/NCCCC/C=C/CC(C1OC(=O)C)C(O)/C=C/C(C)C(O)CC(O)C(C)C(O)CCC(C)C(O)CC2(OC(CC(CC(CC(CC(C(C/C=C/C=C1C)O)C)O)O)O)OC(=O)CC(=O)O)CC(O)C2O)O)C)C)C                                                                                                             | 759                     | Yes              |
| 1619                 | Amycin B                                                                                                                                                 | C/N=C/NCCCC/C=C/CCCC(CC(C1OC(=O)C)C(O)/C=C/C(C)C(O)CC(O)C(C)C(O)CCC(C)C(O)CC2(OC(CC(CC(CC(C(C/C=C/C=C1C)O)C)O)O)O)CC(O)C2O)O)C)N                                                                                                                               | 760                     | Yes              |
| 1620                 | Nificin                                                                                                                                                  | C/N=C/NCCCC/C=C/CCCC(CC(C1OC(=O)C)C(O)/C=C/C(C)C(O)CC(O)C(C)C(O)CCC(C)C(O)CC2(OC(CC(CC(CC(C(C/C=C/C=C1C)O)C)O)O)O)OC(=O)CC(=O)O)CC(O)C2O)O)C)N                                                                                                                 | 761                     | Yes              |
| 1621                 | Indolactam V                                                                                                                                             | OC[C@H]1NC(=O)[C@H](C(C)C)N(c2c3c(C1)c[nH]c3ccc2)C                                                                                                                                                                                                             | 762                     | Yes              |
| 1622                 | Lyngbyatoxin                                                                                                                                             | OCC1NC(=O)C(C(C)C)N(c2c3c(C1)c[nH]c3c(cc2)C(CCC=C(C)C)(C=C)C)C                                                                                                                                                                                                 | 763                     | No               |
| 1623                 | Pendolmycin                                                                                                                                              | OC[C@H]1NC(=O)[C@H](C(C)C)N(c2c3c(C1)c[nH]c3c(cc2)C(C=C)(C)C)C                                                                                                                                                                                                 | 763                     | No               |
| 1624                 | Teleocidin                                                                                                                                               | OC[C@H]1NC(=O)[C@H](C(C)C)N(c2c3c(C1)c[nH]c3c(cc2)[C@](CCC=C(C)C)(C=C)C)C                                                                                                                                                                                      | 763                     | Yes              |
| 1625                 | Cytoblastin                                                                                                                                              | OCC(C(c1c[nH]c2c1cccc2)c1ccc2c3c1[nH]cc3CC(CO)NC(=O)C(N2C)C(C)C)O                                                                                                                                                                                              | 763                     | No               |
| 1626                 | UNII-T7972EPW8P                                                                                                                                          | COc1c2cccc2n2c1c1n(C)c3c(c1[C@@]1([C@@]2(O)C(=O)N(C1=O)C)O)cc(cc3)Cl                                                                                                                                                                                           | 764                     | No               |
| 1627                 | CHEBI:84366                                                                                                                                              | COc1c2cccc2n2c1c1[nH]c3c(c1[C@@]1([C@@]2(O)C(=O)N(C1=O)C)O)cc(cc3)Cl                                                                                                                                                                                           | 764                     | Yes              |
| 1628                 | CHEBI:84367                                                                                                                                              | COc1c2cc(Cl)ccc2n2c1c1[nH]c3c(c1[C@@]1([C@@]2(O)C(=O)N(C1=O)C)O)cc(cc3)Cl                                                                                                                                                                                      | 764                     | No               |
| 1629                 | CHEBI:84368                                                                                                                                              | COc1c2cccc2n2c1c1[nH]c3c(c1[C@@]1([C@@]2(O)C(=O)N(C1=O)C)O)cccc3                                                                                                                                                                                               | 764                     | No               |
| 1630                 | CHEBI:84370                                                                                                                                              | COc1c2cc(Cl)ccc2n2c1c1[nH]c3c(c1C(=O)[C@@]2(O)C(=O)NC)cc(cc3)Cl                                                                                                                                                                                                | 764                     | No               |
| 1631                 | CHEBI:84369                                                                                                                                              | COc1c2cccc2n2c1c1[nH]c3c(c1C(=O)[C@@]2(O)C(=O)NC)cc(cc3)Cl                                                                                                                                                                                                     | 764                     | No               |
| 1632                 | 7-Chloro-11-hydroxy-20-methoxy-N-methyl-12-oxo-3,13-diazapentacyclo[11.7.0.02,10.04,9.014,19]icosan-1(20),2(10),4(9),5,7,14,16,18-octaene-11-carboxamide | COc1c2cccc2n2c1c1[nH]c3c(c1C(C2=O)(O)C(=O)NC)cc(cc3)Cl                                                                                                                                                                                                         | 764                     | No               |
| 1633                 | CHEBI:65639                                                                                                                                              | COc1c2cc(Cl)ccc2n2c1c1[nH]c3c(c1[C@@](C2=O)(O)C(=O)NC)cc(cc3)Cl                                                                                                                                                                                                | 764                     | No               |
| 1634                 | 7,17-Dichloro-11-hydroxy-20-methoxy-N-methyl-12-oxo-3,13-diazapentacyclo[11.7.0.02,10.04,9.014,19]icosan-1(20),2(10),4(9),5,7,14,                        | COc1c2cc(Cl)ccc2n2c1c1[nH]c3c(c1C(C2=O)(O)C(=O)NC)cc(cc3)Cl                                                                                                                                                                                                    | 764                     | No               |

| Comp No <sup>a</sup> | Name                                                                              | SMILES <sup>b</sup>                                                                                           | Cluster No <sup>c</sup> | Rep <sup>d</sup> |
|----------------------|-----------------------------------------------------------------------------------|---------------------------------------------------------------------------------------------------------------|-------------------------|------------------|
|                      | 19),15,17-octaene-11-carboxamide                                                  |                                                                                                               |                         |                  |
| 1635                 | Rebeccamycin                                                                      | <chem>CO[C@@H]1[C@@H](CO)O[C@H]([C@@H]([C@H]1O)O)n1c2c(Cl)cccc2c2c1[nH]c3c(c1c1c2c(=O)[nH]c1=O)cccc3Cl</chem> | 765                     | Yes              |
| 1636                 | 4'-N-Formyl-7-oxoholysin A                                                        | <chem>O=CN[C@@H]1C[C@@H](O[C@H]([C@@H]1O)C)n1c2c3[nH]c4c(c3c3c(c2c2c1cccc2)c(=O)[nH]c3=O)cccc4</chem>         | 766                     | No               |
| 1637                 | 7-Oxoholysin A                                                                    | <chem>O[C@@H]1[C@H](N)C[C@@H](O[C@H]1C)n1c2c3[nH]c4c(c3c3c(c2c2c1cccc2)c(=O)[nH]c3=O)ccc4</chem>              | 766                     | No               |
| 1638                 | 7-Oxostauroporine                                                                 | <chem>CN[C@H]1CC2O[C@@]([C@@H]1OC)(C)n1c3cccc3c3c1c1n2c2cccc2c1c1c3c(=O)[nH]c1=O</chem>                       | 766                     | No               |
| 1639                 | 7-Oxo-K252d                                                                       | <chem>O[C@H]1[C@H](C)O[C@H]([C@@H]([C@@H]1O)O)n1c2c3[nH]c4c(c3c3c(c2c2c1cccc2)c(=O)[nH]c3=O)cccc4</chem>      | 766                     | No               |
| 1640                 | 7-Oxo-MLR-52                                                                      | <chem>CO[C@@H]1[C@@H](O)[C@@H](O)[C@H]2O[C@]1(C)n1c3cccc3c3c1c1n2c2cccc2c1c1c3c(=O)[nH]c1=O</chem>            | 766                     | No               |
| 1641                 | 3'-Demethyl-RK-1409                                                               | <chem>CO[C@@H]1[C@H](N)C[C@H]2O[C@]1(C)n1c3cccc3c3c1c1n2c2cccc2c1c1c3c(=O)[nH]c1=O</chem>                     | 766                     | No               |
| 1642                 | RK-1409                                                                           | <chem>CN[C@H]1C[C@@H]2O[C@@]([C@@H]1OC)(C)n1c3cccc3c3c1c1n2c2cccc2c1c1c3c(=O)[nH]c1=O</chem>                  | 766                     | No               |
| 1643                 | 7-Oxo-K252b                                                                       | <chem>O=c1[nH]c(=O)c2c1c1c3cccc3n3c1c1c2c2cccc2n1[C@@H]1O[C@@]3(C)[C@](C1)(O)C(=O)O</chem>                    | 766                     | No               |
| 1644                 | 4'-Demethylamino-4'-oxostauroporine                                               | <chem>CO[C@@H]1C(=O)C[C@H]2O[C@]1(C)n1c3cccc3c3c1c1n2c2cccc2c1c1c3CNC1=O</chem>                               | 766                     | No               |
| 1645                 | Tan 1030A                                                                         | <chem>O/N=C\1/CC2OC(C1OC)(C)n1c3cccc3c3c1c1n2c2cccc2c1c1c3CNC1=O</chem>                                       | 766                     | No               |
| 1646                 | CHEMBL94678                                                                       | <chem>COC(=O)[C@]1(O)C[C@H]2O[C@]1(C)n1c3cccc3c3c1c1n2c2cccc2c1c1c3CNC1=O</chem>                              | 766                     | No               |
| 1647                 | K252a-Me                                                                          | <chem>COC(=O)[C@@]1(OC)C[C@H]2O[C@]1(C)n1c3cccc3c3c1c1n2c2cccc2c1c1c3CNC1=O</chem>                            | 766                     | No               |
| 1648                 | K252a                                                                             | <chem>COC(=O)C1(O)C[C@H]2O[C@]1(C)n1c3cccc3c3c1c1n2c2cccc2c1c1c3CNC1=O</chem>                                 | 766                     | No               |
| 1649                 | Antibiotic K 252a                                                                 | <chem>COC(=O)C1(O)CC2O[C@]1(C)n1c3cccc3c3c1c1n2c2cccc2c1c1c3CNC1=O</chem>                                     | 766                     | No               |
| 1650                 | Streptocarbazole B                                                                | <chem>COC1=C(C)O[C@@H]2C[C@@]1(OC)n1c3cccc3c3c1c1n2c2cccc2c1c1c3CNC1=O</chem>                                 | 766                     | No               |
| 1651                 | Streptocarbazole A                                                                | <chem>OCC1=C(OC)C2(CC(O1)n1c3cccc3c3c1c1n2c2cccc2c1c1c3C(=O)NC1)OC</chem>                                     | 766                     | No               |
| 1652                 | CID 72501072                                                                      | <chem>COC1=C(C)OC2CC1(OC)n1c3cccc3c3c1c1n2c2cccc2c1c1c3CNC1=O</chem>                                          | 766                     | No               |
| 1653                 | Stauroporine M2                                                                   | <chem>CC(=O)c1cccn1[C@@H]1C[C@H]2O[C@]([C@@H]1O)(C)n1c3cccc3c3c1c1n2c2cccc2c1c1c3CNC1=O</chem>                | 766                     | No               |
| 1654                 | Holysine A                                                                        | <chem>O[C@@H]1[C@H](N)C[C@@H](O[C@H]1C)n1c2c(c3c1cccc3)c1C(=O)NCc1c1c2[nH]c2c1cccc2</chem>                    | 766                     | No               |
| 1655                 | Holysine B                                                                        | <chem>O=C1NCc2c1c1c(c3c2c2cccc2[nH]3)n(c2c1cccc2)[C@H]1C[C@@H](N)[C@H](C(O1)(C)O)O</chem>                     | 766                     | No               |
| 1656                 | 3'-N-Formylholysine A                                                             | <chem>O=CN[C@@H]1C[C@@H](O[C@H]([C@@H]1O)C)n1c2c(c3c1cccc3)c1C(=O)NCc1c1c2[nH]c2c1cccc2</chem>                | 766                     | No               |
| 1657                 | 3'-N-Acetylholysine A                                                             | <chem>CC(=O)N[C@@H]1C[C@@H](O[C@H]([C@@H]1O)C)n1c2c(c3c1cccc3)c1C(=O)NCc1c1c2[nH]c2c1cccc2</chem>             | 766                     | No               |
| 1658                 | RK-1409B                                                                          | <chem>CO[C@H]1[C@@H](O)CC2O[C@@]1(C)n1c3cccc3c3c1c1n2c2cccc2c1c1c3C(=O)NC1</chem>                             | 766                     | No               |
| 1659                 | 3'-O-Demethyl-4'-N-demethyl-4'-N-acetyl-4'-epi-stauroporine                       | <chem>CC(=O)N[C@H]1CC2O[C@]([C@@H]1O)(C)n1c3cccc3c3c1c1n2c2cccc2c1c1c3CNC1=O</chem>                           | 766                     | No               |
| 1660                 | K252d                                                                             | <chem>O[C@H]1[C@H](C)OC([C@@H]([C@@H]1O)O)n1c2c(c3c1cccc3)c1C(=O)NCc1c1c2[nH]c2c1cccc2</chem>                 | 766                     | No               |
| 1661                 | Fradcarbazole C                                                                   | <chem>N#CN([C@@H]1C[C@H]2O[C@]([C@@H]1OC)(C)n1c3cccc3c3c1c1n2c2cccc2c1c1c3CNC1=O)C</chem>                     | 766                     | No               |
| 1662                 | 4'-N-Acetyl-stauroporine                                                          | <chem>CO[C@@H]1[C@@H](C[C@H]2O[C@]1(C)n1c3cccc3c3c1c1n2c2cccc2c1c1c3CNC1=O)N(C(=O)C)C</chem>                  | 766                     | No               |
| 1663                 | 7-Hydroxystauroporine                                                             | <chem>CN[C@H]1CC2O[C@@]([C@@H]1OC)(C)n1c3cccc3c3c1c1n2c2cccc2c1c1c3[C@@H](NC1=O)O</chem>                      | 766                     | No               |
| 1664                 | Stauroporine M1                                                                   | <chem>CC(=O)N[C@@H]1C[C@H]2O[C@]([C@@H]1O)(C)n1c3cccc3c3c1c1n2c2cccc2c1c1c3CNC1=O</chem>                      | 766                     | No               |
| 1665                 | (R)-L-Digitoxosyl-arcyriaflavin A                                                 | <chem>O=C1NCc2c1c1c3cccc3n3c1c1c2c2cccc2n1[C@]1(O[C@@H]3C[C@H]([C@H]1O)O)C</chem>                             | 766                     | No               |
| 1666                 | MLR-52                                                                            | <chem>CO[C@@H]1[C@@H](O)[C@@H](O)[C@H]2O[C@]1(C)n1c3cccc3c3c1c1n2c2cccc2c1c1c3CNC1=O</chem>                   | 766                     | No               |
| 1667                 | Stauroporine                                                                      | <chem>CN[C@@H]1C[C@H]2O[C@]([C@@H]1OC)(C)n1c3cccc3c3c1c1n2c2cccc2c1c1c3CNC1=O</chem>                          | 766                     | No               |
| 1668                 | N-[(2R,4R,5R,6S)-5-Methoxy-6-methyl-18-oxo-29-oxa-1,7,17-triazaoctacyclo[12.12.2. | <chem>CCC(=O)N([C@@H]1C[C@H]2O[C@]([C@@H]1OC)(C)n1c3cccc3c3c1c1n2c2cccc2c1c1c3CNC1=O)C</chem>                 | 766                     | No               |

| Comp No <sup>a</sup> | Name                                                                                                                                                                                                               | SMILES <sup>b</sup>                                                                                                        | Cluster No <sup>c</sup> | Rep <sup>d</sup> |
|----------------------|--------------------------------------------------------------------------------------------------------------------------------------------------------------------------------------------------------------------|----------------------------------------------------------------------------------------------------------------------------|-------------------------|------------------|
|                      | <sup>12,6,07,28,08,13,015,19,020,27,021,26</sup> ]nonacosa-8,10,12,14(28),15(19),20(27),21(26),22,24-nonaen-4-yl]-N-methylpropanamide                                                                              |                                                                                                                            |                         |                  |
| 1669                 | 3'-N-Demethyl-4'-hydroxystaurosporine                                                                                                                                                                              | <chem>O=C1NCc2c1c1c3cccc3n3c1c1c2c2cccc2n1[C@]1(O)[C@@H]3C[C@H]([C@H]1O)N)C</chem>                                         | 766                     | No               |
| 1670                 | UCN 02                                                                                                                                                                                                             | <chem>CN[C@H]1CC2O[C@@]([C@@H]1OC)(C)n1c3cccc3c3c1c1n2c2cccc2c1c1c3[C@H](NC1=O)O</chem>                                    | 766                     | No               |
| 1671                 | 1-[(2R,4R,5R,6S)-5-Methoxy-6-methyl-18-oxo-29-oxa-1,7,17-triazaoctacyclo[12.12.2. <sup>12,6,07,28,08,13,015,19,020,27,021,26</sup> ]nonacosa-8,10,12,14(28),15(19),20(27),21(26),22,24-nonaen-4-yl]-1-methylurea   | <chem>CO[C@@H]1[C@@H](C[C@H]2O[C@]1(C)n1c3cccc3c3c1c1n2c2cccc2c1c1c3CNC1=O)N(C(=O)N)C</chem>                               | 766                     | No               |
| 1672                 | (2S,3R,4R,6R)-4-[Hydroxy(methyl)amino]-3-methoxy-2-methyl-29-oxa-1,7,17-triazaoctacyclo[12.12.2. <sup>12,6,07,28,08,13,015,19,020,27,021,26</sup> ]nonacosa-8(13),9,11,14(28),15(19),20(27),21,23,25-nonaen-16-one | <chem>CO[C@@H]1[C@@H](C[C@H]2O[C@]1(C)n1c3cccc3c3c1c1n2c2cccc2c1c1c3CNC1=O)N(O)C</chem>                                    | 766                     | No               |
| 1673                 | C07349                                                                                                                                                                                                             | <chem>CN[C@@H]1CC2O[C@]([C@@H]1O)(C)n1c3cccc3c3c1c1n2c2cccc2c1c1c3CNC1=O</chem>                                            | 766                     | No               |
| 1674                 | Fradcarbazole B                                                                                                                                                                                                    | <chem>CO[C@@H]1[C@@H](C[C@H]2O[C@]1(C)n1c3cccc3c3c1c1n2c2cccc2c1c1c3CNC1=O)N(C(=S)N)C</chem>                               | 766                     | No               |
| 1675                 | RK-286C                                                                                                                                                                                                            | <chem>COC1C(O)CC2OC1(C)n1c3cccc3c3c1c1n2c2cccc2c1c1c3CNC1=O</chem>                                                         | 766                     | Yes              |
| 1676                 | Borrelidin N                                                                                                                                                                                                       | <chem>C[C@@H]1C[C@H](C)C[C@H](C)[C@H](O)/C(=C/C=C[C@@H](OC(=O)C[C@H]([C@@H](C1)C)O)C1CCC[C@@H]1C(=O)N)/CNC(=O)C</chem>     | 767                     | Yes              |
| 1677                 | Borrelidin I                                                                                                                                                                                                       | <chem>C[C@H]1C[C@@H](C)C[C@H](C)[C@H](O)/C(=C/C=C[C@@H](OC(=O)C[C@@H]([C@H](C1)C)O)[C@@H]1CCC[C@H]1C(=O)O)/CNC(=O)C</chem> | 767                     | No               |
| 1678                 | Borrelidin O                                                                                                                                                                                                       | <chem>N#C/C/1=C/C=C/C[C@@H](OC(=O)C[C@H]([C@@H](C[C@@H](C[C@@H]([C@@H]1O)C)C)C)O)C1CCC[C@@H]1C(=O)O</chem>                 | 768                     | No               |
| 1679                 | Borrelidin E                                                                                                                                                                                                       | <chem>N#C/C/1=C/C=C/C[C@H](OC(=O)C[C@H]([C@H](C[C@H]([C@@H]([C@H](C[C@@H]([C@H]1O)C)C)O)C)O)[C@@H]1CCC[C@H]1C(=O)O</chem>  | 768                     | No               |
| 1680                 | Borrelidin K                                                                                                                                                                                                       | <chem>N#CC1=CC=CC[C@H](OC(=O)C[C@@H]([C@H](C[C@H](CC(C[C@@H]([C@H]1O)C)C)O)C)O)[C@@H]1CCC[C@H]1C(=O)O</chem>               | 768                     | Yes              |
| 1681                 | Borrelidin J                                                                                                                                                                                                       | <chem>OC[C@@H]1C[C@H](C)C[C@H](C)[C@@H](O)CC(=O)O[C@@H](CC=CC=C([C@@H]([C@H](C1)C)O)C#N)[C@@H]1CCC[C@H]1C(=O)O</chem>      | 768                     | No               |
| 1682                 | Borrelidin M                                                                                                                                                                                                       | <chem>N#C/C/1=C/C=C/C[C@@H](OC(=O)C[C@H]([C@@H](C[C@@H](C[C@@H](C[C@@H]([C@H]1O)C)C)C)O)C1CCC[C@@H]1C(=O)N</chem>          | 769                     | No               |
| 1683                 | Borrelidin A                                                                                                                                                                                                       | <chem>N#C/C/1=C/C=C/C[C@H](OC(=O)C[C@H]([C@@H](C[C@@H](C[C@@H](C[C@@H]([C@@H]1O)C)C)C)O)C1CCC[C@@H]1C(=O)O</chem>          | 769                     | No               |
| 1684                 | Borrelidin F                                                                                                                                                                                                       | <chem>N#C/C/1=C/C=C/C[C@H](OC(=O)C[C@@H]([C@H](C[C@H](C[C@H](C[C@@H]([C@@H]1O)C)C)C)O)[C@@H]1CCC[C@H]1C(=O)O</chem>        | 769                     | Yes              |
| 1685                 | Borrelidin                                                                                                                                                                                                         | <chem>N#C/C/1=C/C=C/C[C@H](OC(=O)C[C@@H]([C@H](C[C@H](C[C@H](C[C@@H]([C@H]1O)C)C)C)O)[C@@H]1CCC[C@H]1C(=O)O</chem>         | 769                     | No               |
| 1686                 | Borrelidin CR1                                                                                                                                                                                                     | <chem>N#C/C/1=C/C=C/C[C@@H](OC(=O)C[C@H]([C@@H](C[C@@H](C[C@@H](C[C@@H]([C@@H]1O)C)C)C)O)C1CCC[C@@H]1C(=O)N</chem>         | 769                     | No               |
| 1687                 | BC194                                                                                                                                                                                                              | <chem>N#C/C/1=C/C=C/C[C@H](OC(=O)C[C@@H]([C@H](C[C@H](C[C@H](C[C@@H]([C@H]1O)C)C)C)O)[C@@H]1CCC[C@H]1C(=O)O</chem>         | 769                     | No               |
| 1688                 | Borrelidin H                                                                                                                                                                                                       | <chem>[C-]#[N+]/C/1=C/C=C/C[C@H](OC(=O)C[C@@H]([C@H](C[C@H](C[C@H](C[C@@H]([C@@H]1O)C)C)C)O)[C@@H]1CCC[C@H]1C(=O)O</chem>  | 769                     | No               |
| 1689                 | SF 2415A2                                                                                                                                                                                                          | <chem>CC1=C(C2=C(C(=[N+]=[N-])C1=O)C(=O)C3(C(C2=O)(O3)CC=C(C)C)C/C=C(\C)/CCC=C(C)C)O</chem>                                | 770                     | Yes              |
| 1690                 | Zincphyrin IV                                                                                                                                                                                                      | <chem>OC(=O)CCC1=C(C)C2=NC1=Cc1[nH]c(c(c1C)CCC(=O)O)C=c1[nH]c(=CC3=NC(=C2)C=C3CCC(=O)O)C)c1CCC(=O)O)C</chem>               | 771                     | No               |

[illegible]

[illegible]

| Comp No <sup>a</sup> | Name                                                                             | SMILES <sup>b</sup>                                                                                                      | Cluster No <sup>c</sup> | Rep <sup>d</sup> |
|----------------------|----------------------------------------------------------------------------------|--------------------------------------------------------------------------------------------------------------------------|-------------------------|------------------|
| 1759                 | 9-Hydroxyl-3'-N-acetyl-4'-Hydroxylstaurosporine                                  | <chem>CC(=O)N[C@@H]1C[C@H]2O[C@]([C@@H]1O)(C)n1c3ccc(cc3c3c1c1n2c2ccccc2c1c1c3CNC1=O)O</chem>                            | 819                     | No               |
| 1760                 | Fradcarbazole A                                                                  | <chem>CO[C@@H]1[C@@H]([C@H]1C[C@H]2O[C@]1(C)n1c3ccccc3c3c1c1n2c2ccccc2c1c1c3CNC1=O)N(c1ncc(s1)c1c[nH]c2c1cccc2)C</chem>  | 820                     | Yes              |
| 1761                 | Juglorubin                                                                       | <chem>OC(=O)/C=C/C1C2[C-](C3C1C(=O)c1c(O)cccc1C(=O)O[C@@H](C3)CC(=O)O)C(=O)c1c(C2=O)cccc1O</chem>                        | 821                     | Yes              |
| 1762                 | Herboxidiene                                                                     | <chem>CO[C@H]([C@H]1C[C@]1(C)C[C@@H](/C=C/C=C/[C@H]1O[C@H](CC[C@@H]1C)CC(=O)O)\C)C)[C@H](O)C</chem>                      | 822                     | No               |
| 1763                 | 18-Deoxy-25-demethylherboxidiene                                                 | <chem>CC[C@@H]([C@H]([C@H]1O[C@]1(C)C[C@@H](/C=C/C=C/[C@H]1O[C@H](CC[C@@H]1C)CC(=O)O)\C)C)O</chem>                       | 822                     | No               |
| 1764                 | 25-Demethylherboxidiene                                                          | <chem>OC(=O)C[C@H]1CC[C@@H]([C@H](O1)/C=C/C=C/[C@H](C[C@@]1(C)O)[C@@H]1[C@@H]([C@H]([C@H](O)C)O)C)C)C</chem>             | 822                     | Yes              |
| 1765                 | 18-Deoxyherboxidiene                                                             | <chem>CC[C@@H]([C@H]([C@H]1O[C@]1(C)C[C@@H](/C=C/C=C/[C@H]1O[C@H](CC[C@@H]1C)CC(=O)O)\C)C)OC</chem>                      | 822                     | No               |
| 1766                 | 25-Demethylherboxidiene C                                                        | <chem>OC(=O)C[C@H]1CC[C@@H]([C@H](O1)C1(C)OC1/C=C/[C@H](C[C@H]1O[C@@H]1[C@@H]([C@H]([C@H](O)C)O)C)C)C</chem>             | 822                     | No               |
| 1767                 | Herboxidiene A1                                                                  | <chem>CO[C@H]1[C@@H](C)OC([C@@H]1C)C(C[C@@H](/C=C/C=C/[C@H]1O[C@H](CC[C@H]1C)CC(=O)O)\C)C)C</chem>                       | 823                     | Yes              |
| 1768                 | Herboxidiene B1                                                                  | <chem>CO[C@H]1[C@@H](C)O[C@@]([C@@H]([C@@H]1C)O)(C)C[C@@H](/C=C/C=C/[C@H]1O[C@H](CC[C@@H]1C)CC(=O)O)C)C</chem>           | 823                     | No               |
| 1769                 | 5,6-Dihydroxy-25-demethylherboxidiene A1                                         | <chem>OC(=O)C[C@H]1C[C@@H](O)[C@@]([C@H](O1)/C=C/C=C/[C@H](CC(C1O[C@@H]([C@@H]([C@H]1C)O)C)C)C)C)O</chem>                | 824                     | Yes              |
| 1770                 | 5-Hydroxy-25-demethylherboxidiene A1                                             | <chem>OC(=O)C[C@H]1C[C@@H](O)[C@@H]([C@H](O1)/C=C/C=C/[C@H](CC(C1O[C@@H]([C@@H]([C@H]1C)O)C)C)C)C</chem>                 | 824                     | No               |
| 1771                 | 5,6-Dihydroxyherboxidiene A1                                                     | <chem>CO[C@H]1[C@@H](C)OC([C@@H]1C)C(C[C@@H](/C=C/C=C/[C@H]1O[C@@H](CC(=O)O)C[C@@H]([C@@]1(C)O)O)C)C</chem>              | 824                     | No               |
| 1772                 | 5-Hydroxyherboxidiene B1                                                         | <chem>CO[C@H]1[C@@H](C)O[C@@]([C@@H]([C@@H]1C)O)(C)C[C@@H](/C=C/C=C/[C@H]1O[C@@H](CC(=O)O)C[C@H]([C@@H]1C)O)C)C</chem>   | 824                     | No               |
| 1773                 | 5,6-Dihydroxyherboxidiene B1                                                     | <chem>CO[C@H]1[C@@H](C)O[C@@]([C@@H]([C@@H]1C)O)(C)C[C@@H](/C=C/C=C/[C@H]1O[C@@H](CC(=O)O)C[C@H]([C@@]1(C)O)O)C)C</chem> | 824                     | No               |
| 1774                 | 5-Hydroxyherboxidiene A1                                                         | <chem>CO[C@H]1[C@@H](C)OC([C@@H]1C)C(C[C@@H](/C=C/C=C/[C@H]1O[C@@H](CC(=O)O)C[C@@H]([C@@H]1C)O)C)C)C</chem>              | 824                     | No               |
| 1775                 | 5-Hydroxy-25-demethylherboxidiene B1                                             | <chem>OC(=O)C[C@H]1C[C@@H](O)[C@@H]([C@H](O1)/C=C/C=C/[C@H](C[C@@]1(C)O)[C@H](C)[C@@H]([C@H]([C@H]1O)C)O)C)C</chem>      | 824                     | No               |
| 1776                 | 5,6-Dihydroxy-25-demethylherboxidiene B1                                         | <chem>OC(=O)C[C@H]1C[C@@H](O)[C@@]([C@H](O1)/C=C/C=C/[C@H](C[C@@]1(C)O)[C@H](C)[C@@H]([C@H]([C@H]1O)C)O)C)C)O</chem>     | 824                     | No               |
| 1777                 | Herboxidiene C                                                                   | <chem>CC[C@H]([C@H]([C@H]1O[C@H]1C[C@@H](/C=C/C1OC1(C)[C@H]1O[C@H](CC[C@H]1C)CC(=O)O)C)C)[C@H](O)C</chem>                | 825                     | Yes              |
| 1778                 | Kandenol E                                                                       | <chem>O=C1C=C(C)[C@@]23[C@@](C1)(C)C[C@H]([C@H](C2)C(O3)(C)C)O</chem>                                                    | 826                     | Yes              |
| 1779                 | 3-Methyl-antibiotic G-15F                                                        | <chem>CC1=CC2=C(C(O1)C)C(=O)c1c(C2=O)ccc(c1O)[C@@H]1O[C@H](C)[C@H]([C@@H](C1)N(C)C)O</chem>                              | 827                     | Yes              |
| 1780                 | Jadomycin furan 4                                                                | <chem>OCc1cc(C)cc2c1c1c(o2)C(=O)c2c(C1=O)cccc2O[C@H]1C[C@H](O)[C@H](C(O1)C)O</chem>                                      | 828                     | Yes              |
| 1781                 | Jadomycin furan 3                                                                | <chem>O=Cc1cc(C)cc2c1c1c(o2)C(=O)c2c(C1=O)cccc2O[C@H]1C[C@H](O)[C@H](C(O1)C)O</chem>                                     | 828                     | No               |
| 1782                 | CHEMBL1922539                                                                    | <chem>CC/C=C/1[C[C@@H]2N(C1)C(=O)c1c(NC2)cccc1</chem>                                                                    | 829                     | Yes              |
| 1783                 | CHEMBL1922537                                                                    | <chem>CC/C=C/1[C[C@@H]2N(C1)C(=O)c1c(NC2)c(OC)ccc1</chem>                                                                | 829                     | No               |
| 1784                 | (5E,8R,9E)-3-(Carbamoylmethyl)-8,10-dimethyl-7-oxododeca-5,9,11-trienoic acid    | <chem>C=C/C=C/[C@H](C(=O)/C=C/CC(CC(=O)O)CC(=O)N)C)/C</chem>                                                             | 830                     | Yes              |
| 1785                 | Methyl (5E,8R,9E)-3-(carbamoylmethyl)-8,10-dimethyl-7-oxododeca-5,9,11-trienoate | <chem>COC(=O)CC(CC(=O)N)C/C=C/C(=O)[C@@H](/C=C/(C=C)\C)C</chem>                                                          | 830                     | No               |
| 1786                 | CHEBI:66788                                                                      | <chem>CC/C=C/C=C/[C(C(CC(/C=C/C=C/C1OC(=O)C=CC1OC)OC)C)O)OC</chem>                                                       | 831                     | Yes              |



| Comp No <sup>a</sup> | Name                                                                                                             | SMILES <sup>b</sup>                                                                                            | Cluster No <sup>c</sup> | Rep <sup>d</sup> |
|----------------------|------------------------------------------------------------------------------------------------------------------|----------------------------------------------------------------------------------------------------------------|-------------------------|------------------|
| 1787                 | Sultricien                                                                                                       | <chem>CCCCC/C=C/C=C/C=C/C(C(=O)C(=O)C/C=C/C1OC(=O)C=CC1O)C)O</chem>                                            | 832                     | Yes              |
| 1788                 | CHEBI:69413                                                                                                      | <chem>CC/C=C/[C@H]1C/C=C/C=C/[C@H](OC)[C@@H](O)[C@@H](O)[C@@H](C)/C=C/C[C@H](/C=C/C=C(/C=C/C(=O)O1)\C)C</chem> | 833                     | Yes              |
| 1789                 | CHEBI:69411                                                                                                      | <chem>CC/C=C/[C@H]1C/C=C/C=C/[C@H](O)C[C@@H](O)[C@@H](C)/C=C/C[C@H](/C=C/C=C(/C=C/C(=O)O1)\C)C</chem>          | 833                     | No               |
| 1790                 | Atacamycin A                                                                                                     | <chem>CC/C=C\1/C/C=C/C=C\C(OC)C(O)C(C)/C=C/C/C(/C=C/C=C(/C=C/C(=O)O1)\C)C)OC</chem>                            | 834                     | Yes              |
| 1791                 | Atacamycin B                                                                                                     | <chem>CC/C=C\1/C/C=C/C=C\C(OC)C(O)C(C)/C=C/CC(/C=C/C=C(/C=C/C(=O)O1)\C)C</chem>                                | 835                     | Yes              |
| 1792                 | Atacamycin C                                                                                                     | <chem>CC/C=C\1/C/C=C/C=C\C(OC)CC(O)C(C)/C=C/CC(/C=C/C=C(/C=C/C(=O)O1)\C)C</chem>                               | 835                     | No               |
| 1793                 | CHEBI:69412                                                                                                      | <chem>CC/C=C/[C@H]1C/C=C/C=C/[C@H](O)[C@@H](O)[C@@H](O)[C@@H](C)/C=C/C[C@H](/C=C/C=C(/C=C/C(=O)O1)\C)C</chem>  | 836                     | Yes              |
| 1794                 | Emycin D                                                                                                         | <chem>CC1CC(=O)c2c(C1)ccc1c2C2OC(O1)c1c2cccc1O</chem>                                                          | 837                     | Yes              |
| 1795                 | (R)-3-Hydroxy-7-((1S,3R)-3-hydroxy-7-methoxy-2,3-dihydro-1H-inden-1-yl)-3-methyl-3,4-dihydronaphthalen-1(2H)-one | <chem>COc1cccc2c1[C@@H](C[C@H]2O)c1ccc2c(c1)C(=O)C[C@](C2)(C)O</chem>                                          | 838                     | No               |
| 1796                 | (R)-3-Hydroxy-7-((1S,3S)-3-hydroxy-7-methoxy-2,3-dihydro-1H-inden-1-yl)-3-methyl-3,4-dihydronaphthalen-1(2H)-one | <chem>COc1cccc2c1[C@@H](C[C@@H]2O)c1ccc2c(c1)C(=O)C[C@](C2)(C)O</chem>                                         | 838                     | No               |
| 1797                 | (R)-7-((1S,3R)-3-Ethoxy-7-methoxy-2,3-dihydro-1H-inden-1-yl)-3-hydroxy-3-methyl-3,4-dihydronaphthalen-1(2H)-one  | <chem>CCO[C@@H]1C[C@H](c2c1cccc2OC)c1ccc2c(c1)C(=O)C[C@](C2)(C)O</chem>                                        | 838                     | No               |
| 1798                 | (R)-7-((1S,3S)-3-Ethoxy-7-methoxy-2,3-dihydro-1H-inden-1-yl)-3-hydroxy-3-methyl-3,4-dihydronaphthalen-1(2H)-one  | <chem>CCO[C@H]1C[C@H](c2c1cccc2OC)c1ccc2c(c1)C(=O)C[C@](C2)(C)O</chem>                                         | 838                     | No               |
| 1799                 | (R)-7-((1S,3R)-3,7-Dimethoxy-1,3-dihydroisobenzofuran-1-yl)-3-hydroxy-3-methyl-3,4-dihydronaphthalen-1(2H)-one   | <chem>COc1cccc2c1[C@@H](O[C@H]2OC)c1ccc2c(c1)C(=O)C[C@](C2)(C)O</chem>                                         | 838                     | No               |
| 1800                 | 1,4-Dimethoxy-3-(3'-hydroxy-3'-methyl-1'-tetralone)-1(3H)-isobenzofuran                                          | <chem>COc1cccc2c1[C@H](O[C@H]2OC)c1ccc2c(c1)C(=O)C[C@](C2)(C)O</chem>                                          | 838                     | Yes              |
| 1801                 | (R)-7-((1R,3S)-3,7-Dimethoxy-1,3-dihydroisobenzofuran-1-yl)-3-hydroxy-3-methyl-3,4-dihydronaphthalen-1(2H)-one   | <chem>COc1cccc2c1[C@H](O[C@@H]2OC)c1ccc2c(c1)C(=O)C[C@](C2)(C)O</chem>                                         | 838                     | No               |
| 1802                 | (3R,8S,13S)-3-Hydroxy-9-methoxy-3-methyl-3,4,8,13-tetrahydro-8,13-epoxybenzo[e]naphtho[2,1-b]oxepin-1(2H)-one    | <chem>COc1cccc2c1[C@@H]1Oc3c([C@H]2O1)c1C(=O)C[C@](Cc1cc3)(C)O</chem>                                          | 839                     | Yes              |
| 1803                 | (3R,8R,13R)-3-Hydroxy-9-methoxy-3-                                                                               | <chem>COc1cccc2c1[C@H]1Oc3c([C@@H]2O1)c1C(=O)C[C@](Cc1cc3)(C)O</chem>                                          | 839                     | No               |

| Comp No <sup>a</sup> | Name                                                                         | SMILES <sup>b</sup>                                                                                                                                                                                                                                                                                                                                                                                              | Cluster No <sup>c</sup> | Rep <sup>d</sup> |
|----------------------|------------------------------------------------------------------------------|------------------------------------------------------------------------------------------------------------------------------------------------------------------------------------------------------------------------------------------------------------------------------------------------------------------------------------------------------------------------------------------------------------------|-------------------------|------------------|
|                      | methyl-3,4,8,13-tetrahydro-8, 13-epoxybenzo[e]naphtho[2,1-b]oxepin-1(2H)-one |                                                                                                                                                                                                                                                                                                                                                                                                                  |                         |                  |
| 1804                 | Versipelostatin A                                                            | <chem>OC[C@H]1C[C@H](C)[C@H](O[C@H]2C[C@H](O)[C@H]([C@H](O2)C)O[C@H]2C[C@H](O C)[C@H]([C@H](O2)C)O[C@H]2C[C@H](O)[C@H]([C@H](O2)C)O[C@H](C)CCC(C)[C@H]2C @]3(C=C(C(=O)[C@H]4[C@H](C(=C1)/CC)C=C[C@H]1[C@H]4[C@H](C)C(=O)C[C@H]1C) C)CC)C(=O)C3)O[C@H](C=C2)C)C</chem>                                                                                                                                            | 840                     | Yes              |
| 1805                 | Lobophorin F                                                                 | <chem>COC(=O)N[C@H]1[C@H](C)O[C@H](C[C@H]1(C)[N+](=O)[O-])O[C@H]1C/C=C(C)/C[C@H]2C=C[C@H]3[C@H]([C@H]2C)C(=C2C(=O)[C@H]4[C@H](C=C1/C)C =C(C)[C@H](C4)C)OC2=O)O[C@H](C)C[C@H]([C@H]3O[C@H]1O[C@H](C)[C@H](C)[C@H](C1)O[C@H]1C[C@H](O)[C@H]([C@H](O1)C)O)O)C</chem>                                                                                                                                                | 841                     | Yes              |
| 1806                 | Lobophorin                                                                   | <chem>OCC1CCC23C(C1)/C=C(C)/C[C@H](C/C=C/[C@H]1[C@H](C=O)C([C@H]3O)C(=O)O2)(C)[C@H]2 [C@H](C)C[C@H]([C@H]([C@H]2C=C1)O[C@H]1OC(C)[C@H]([C@H](C1)O[C@H]1C[C @H](O)[C@H](C(O1)C)OC1C[C@H](O)C(C(O1)C)OC)O)C)O[C@H]1OC(C)C(C(C1)(C)N (=O)=O)NC(=O)OC</chem>                                                                                                                                                         | 842                     | Yes              |
| 1807                 | Lobophorin E                                                                 | <chem>COC(=O)N[C@H]1[C@H](C)O[C@H](C[C@H]1(C)[N+](=O)[O-])O[C@H]1C/C=C(C)/C[C@H]2C=C[C@H]3[C@H]([C@H]2C)C(=C2C(=O)[C@H]4[C@H](C=C1/C)C =C(C)[C@H](C4)C)OC2=O)O[C@H](C)C[C@H]([C@H]3O[C@H]1O[C@H](C)[C@H](C)[C@H](C1)O[C@H]1C[C@H](O)[C@H]([C@H](O1)C)O)O)C</chem>                                                                                                                                                | 843                     | Yes              |
| 1808                 | Lobophorin B                                                                 | <chem>COC(=O)N[C@H]1[C@H](C)O[C@H](C[C@H]1(C)[N+](=O)[O-])O[C@H]1C/C=C(C)/C[C@H]2C=C[C@H]3[C@H]([C@H]2C)C(=C2C(=O)[C@H]4[C@H](C=C1/C)C =C(CO)[C@H](C4)C)OC2=O)O[C@H](C)C[C@H]([C@H]3O[C@H]1O[C@H](C)[C@H](C)[C@H](C1)O[C@H]1C[C@H](O)[C@H]([C@H](O1)C)O)O)C</chem>                                                                                                                                               | 844                     | Yes              |
| 1809                 | Lobophorin C                                                                 | <chem>COC(=O)N[C@H]1[C@H](C)O[C@H](C[C@H]1(C)N)OC1C/C=C(C)/C[C@H]2C=C[C@H]3[C@ @H]([C@H]2C)C(=O)C2=C(C4[C@H](C=C1/C)C=C(CO)[C@H](C4)C)OC2=O)O[C@H](C)C[C@ H]([C@H]3O[C@H]1O[C@H](C)[C@H]([C@H](C1)O[C@H]1C[C@H](O)[C@H]([C@H](O1)C)O[C@H]1C[C@H](O)[C@H]([C@H](O1)C)OC)O)C</chem>                                                                                                                                | 845                     | Yes              |
| 1810                 | Kijanimicin                                                                  | <chem>COC(=O)N[C@H]1[C@H](C)O[C@H](C[C@H]1(C)[N+](=O)[O-])O[C@H]1C/C=C(C)/C[C@H]2C=C[C@H]3[C@H]([C@H]2C)C(=C2C(=O)[C@H]4[C@H](C=C1/C) C=C(CO)[C@H](C4)C)OC2=O)O[C@H](C)C[C@H]([C@H]3O[C@H]1O[C@H](C)[C@H](C)[C@H](C1)O[C@H]1C[C@H](O)[C@H]([C@H](O1)C)O)O)C</chem>                                                                                                                                               | 846                     | Yes              |
| 1811                 | Lobophorin K                                                                 | <chem>COC(=O)N[C@H]1[C@H](C)O[C@H](C[C@H]1(C)N)O[C@H]1CC=C(C)[C@H]2C=C[C@H]3[C @H]([C@H]2C)C(=C2C(=O)[C@H]4[C@H](C=C1C)C=C(CO)[C@H](C4)C)OC2=O)O[C@H](C)C[ C@H]([C@H]3O[C@H]1O[C@H](C)[C@H]([C@H](C1)O[C@H]1C[C@H](O)[C@H]([C@H](O1)C)O[C@H]1C[C@H](O)[C@H]([C@H](O1)C)OC)O)C</chem>                                                                                                                             | 847                     | Yes              |
| 1812                 | Lobophorin A                                                                 | <chem>COC(=O)N[C@H]1[C@H](C)O[C@H](C[C@H]1(C)N)O[C@H]1C/C=C(C)/C[C@H]2C=C[C@H]3[C @H]([C@H]2C)C(=C2C(=O)[C@H]4[C@H](C=C1/C)C=C(CO)[C@H](C4)C)OC2=O)O[C@H](C) C[C@H]([C@H]3O[C@H]1O[C@H](C)[C@H]([C@H](C1)O[C@H]1C[C@H](O)[C@H]([C@H](O1)C)O[C@H]1C[C@H](O)[C@H]([C@H](O1)C)OC)O)C</chem>                                                                                                                         | 848                     | Yes              |
| 1813                 | Lobophorin CR4                                                               | <chem>CO[C@H]1[C@H](O)[C@H](O[C@H]1C)O[C@H]1[C@H](O)CC(O[C@H]1C)O[C@H] 1C[C@H](O)[C@H]([C@H]1O)C)O[C@H]1[C@H](C)C[C@H]([C@H]2[C@H]1C=C[C @H]1[C@H]2(C)C(=O)C2=C(O)[C@H]3(OC2=O)C[C@H](C)C(=C[C@H]3/C=C/[C@H](C/C=C/1\ C)O)C)C)C</chem>                                                                                                                                                                           | 849                     | Yes              |
| 1814                 | Abamectin                                                                    | <chem>CO[C@H]1C[C@H](O[C@H]2[C@H](C)/C=C/C3CO[C@H]4[C@H]3(O)[C@H](C=C([C@H]4O )C)C(=O)O[C@H]3C[C@H](C/C=C/2(C)O[C@H]2(C3)C=C[C@H]([C@H](O2)C(C)C)C)O[C@H]([ C@H]1O[C@H]1C[C@H](OC)[C@H]([C@H](O1)C)O)C.CO[C@H]1C[C@H](O)[C@H]([C@H]1O[C@H]1C[C@H](OC)[C@H]([C@H](O1)C)O)C)O[C@H]1[C@H](C)/C=C/C/2(CO[C@H]3[ C@H]2(O)[C@H](C=C([C@H]3O)C)C(=O)O[C@H]2C[C@H](C/C=C/1(C)O[C@H]1(C2)C=C[C@ @H]([C@H](O1)C)C)C</chem> | 850                     | No               |
| 1815                 | Avermectin A1b                                                               | <chem>CO[C@H]1C[C@H](O[C@H]([C@H]1O[C@H]1C[C@H](OC)[C@H]([C@H](O1)C)O)C)O[C@ H]1[C@H](C)/C=C/C/2(CO[C@H]3[C@H]2(O)[C@H](C=C([C@H]3OC)C)C(=O)O[C@H]2C[C@ @H]([C@H](C/C=C/1(C)O[C@H]1(C2)C=C[C@H]([C@H](O1)C)C)C</chem>                                                                                                                                                                                            | 850                     | No               |
| 1816                 | Ivermectin B1b                                                               | <chem>CO[C@H]1C[C@H](O[C@H]([C@H]1O[C@H]1C[C@H](OC)[C@H]([C@H](O1)C)O)C)O[C@ H]1[C@H](C)/C=C/C/2(CO[C@H]3[C@H]2(O)[C@H](C=C([C@H]3O)C)C(=O)O[C@H]2C[C@ @H]([C@H](C/C=C/1(C)O[C@H]1(C2)CC[C@H]([C@H](O1)C)C)C</chem>                                                                                                                                                                                              | 850                     | No               |
| 1817                 | Tenvermectin B                                                               | <chem>CO[C@H]1C[C@H](O[C@H]([C@H]1O[C@H]1C[C@H](OC)[C@H]([C@H](O1)C)O)C)O[C@ H]1[C@H](C)/C=C/C/2(CO[C@H]3[C@H]2(O)[C@H](C=C([C@H]3O)C)C(=O)O[C@H]2C[C@ @H]([C@H](C/C=C/1(C)O[C@H]1(C2)CC[C@H]([C@H](O1)C)C)C</chem>                                                                                                                                                                                              | 850                     | No               |
| 1818                 | CTK8E8557                                                                    | <chem>CO[C@H]1C[C@H](O[C@H]2[C@H](C)C=CC=C3CO[C@H]4[C@H]3(O)[C@H](C=C([C@H]4O)C )C(=O)O[C@H]3C[C@H](CC=C2C)O[C@H]2(C3)C=C[C@H]([C@H](O2)[C@H](CC)C)O[C@H] ([C@H]1O[C@H]1C[C@H](OC)[C@H]([C@H](O1)C)O)C</chem>                                                                                                                                                                                                    | 850                     | No               |

| Comp No <sup>a</sup> | Name                                                                                                                                                                                                                                                                                                                                                                        | SMILES <sup>b</sup>                                                                                                                                                                                                        | Cluster No <sup>c</sup> | Rep <sup>d</sup> |
|----------------------|-----------------------------------------------------------------------------------------------------------------------------------------------------------------------------------------------------------------------------------------------------------------------------------------------------------------------------------------------------------------------------|----------------------------------------------------------------------------------------------------------------------------------------------------------------------------------------------------------------------------|-------------------------|------------------|
| 1819                 | Avermectin A1a                                                                                                                                                                                                                                                                                                                                                              | <chem>CO[C@H]1C[C@H](O[C@H]2[C@@H](C)/C=C/C=3CO[C@H]4[C@]3(O)[C@@H](C=C([C@H]4O)C)C(=O)O[C@H]3C[C@@H](C/C=C/2CO[C@]2(C3)C=C[C@@H]([C@H](O2)C(CC)C)C)O[C@H]1([C@@H]1O[C@H]1C[C@H](OC)[C@H]([C@@H](O1)C)O)C</chem>           | 850                     | No               |
| 1820                 | Tenvermectin C                                                                                                                                                                                                                                                                                                                                                              | <chem>CO[C@H]1C[C@H](O[C@H]2[C@@H](C)/C=C/C=3CO[C@H]4[C@]3(O)[C@@H](C=C([C@H]4O)CC)C(=O)O[C@H]3C[C@@H](C/C=C/2CO[C@]2(C3)CC[C@@H]([C@H](O2)C)C)O[C@H]1([C@@H]1O[C@H]1C[C@H](OC)[C@H]([C@@H](O1)C)O)C</chem>                | 850                     | No               |
| 1821                 | Tenvermectin A                                                                                                                                                                                                                                                                                                                                                              | <chem>CO[C@H]1C[C@H](O[C@H]([C@@H]1O[C@H]1C[C@H](OC)[C@H]([C@@H](O1)C)O)C)O[C@H]1[C@@H](C)/C=C/C=2CO[C@H]3[C@@]2(O)[C@@H](C=C([C@H]3O)C)C(=O)O[C@H]2C[C@@H](C/C=C/1CO)O[C@]1(C2)CC[C@@H]([C@H](O1)C)C</chem>               | 850                     | No               |
| 1822                 | Delta2,3-tenvermectin A                                                                                                                                                                                                                                                                                                                                                     | <chem>CO[C@H]1C[C@H](O[C@H]([C@@H]1O[C@H]1C[C@H](OC)[C@H]([C@@H](O1)C)O)C)O[C@H]1[C@@H](C)/C=C/C=2CO[C@]3([C@@]2(O)C=C[C@@H]([C@H]3O)C)C(=O)O[C@H]2C[C@@H](C/C=C/1CO)O[C@]1(C2)CC[C@@H]([C@H](O1)C)C</chem>                | 850                     | No               |
| 1823                 | Ivermectin                                                                                                                                                                                                                                                                                                                                                                  | <chem>CO[C@H]1C[C@H](O[C@H]2[C@@H](C)/C=C/C=3CO[C@H]4[C@]3(O)[C@@H](C=C([C@H]4O)C)C(=O)O[C@H]3C[C@@H](C/C=C/2CO[C@]2(C3)CC[C@@H]([C@H](O2)[C@H](CC)C)C)O[C@H]1([C@@H]1O[C@H]1C[C@H](OC)[C@H]([C@@H](O1)C)O)C</chem>        | 850                     | No               |
| 1824                 | Avermectin A2a                                                                                                                                                                                                                                                                                                                                                              | <chem>CO[C@H]1C[C@H](O[C@H]2[C@@H](C)/C=C/C=3CO[C@H]4[C@]3(O)[C@@H](C=C([C@H]4O)C)C(=O)O[C@H]3C[C@@H](C/C=C/2CO[C@]2(C3)C[C@H](O)[C@@H]([C@H](O2)C(CC)C)C)O[C@H]1([C@@H]1O[C@H]1C[C@H](OC)[C@H]([C@@H](O1)C)O)C</chem>     | 850                     | No               |
| 1825                 | CHC-B2                                                                                                                                                                                                                                                                                                                                                                      | <chem>CO[C@H]1C[C@H](O[C@@H]2C(=C/C[C@@H]3C[C@H](OC(=O)[C@H]4[C@@]5/C(=C/C=C/[C@@H]2C)/CO[C@@H]5[C@H](O)C(=C4)C)O)C[C@@]2(O3)C[C@H](O)[C@@H](C(O2)C2CCCC2C)/C)O[C@H]1([C@@H]1O[C@H]1C[C@H](OC)[C@H]([C@@H](O1)C)O)C</chem> | 850                     | No               |
| 1826                 | Tenvermectin D                                                                                                                                                                                                                                                                                                                                                              | <chem>CO[C@H]1C[C@H](O[C@H]([C@@H]1O[C@H]1C[C@H](OC)[C@H]([C@@H](O1)C)O)C)O[C@H]1[C@@H](CC)/C=C/C=2CO[C@H]3[C@@]2(O)[C@@H](C=C([C@H]3O)C)C(=O)O[C@H]2C[C@@H](C/C=C/1CO)O[C@]1(C2)CC[C@@H]([C@H](O1)C)C</chem>              | 850                     | No               |
| 1827                 | Doramectin                                                                                                                                                                                                                                                                                                                                                                  | <chem>CO[C@H]1C[C@H](O[C@H](C1O[C@H]1C[C@H](OC)[C@H]([C@@H](O1)C)O)C)OC1[C@@H](C)/C=C/C=2CO[C@H]3[C@@]2(O)[C@@H](C=C([C@H]3O)C)C(=O)O[C@H]2C[C@@H](C/C=C/1CO)O[C@]1(C2)C=C[C@@H]([C@H](O1)C1CCCCC1)C</chem>                | 850                     | No               |
| 1828                 | Avermectin A1                                                                                                                                                                                                                                                                                                                                                               | <chem>COC1CC(O[C@H]2[C@@H](C)/C=C/C=3CO[C@H]4[C@]3(O)[C@@H](C=C([C@H]4O)C)C(=O)O[C@H]3C[C@@H](C/C=C/2CO)O[C@]2(C3)C=C[C@@H]([C@H](O2)[C@H](CC)C)OC(C1OC1C(C)C)C(C(O1)C)O)C</chem>                                          | 850                     | No               |
| 1829                 | Avermectin B1b                                                                                                                                                                                                                                                                                                                                                              | <chem>CO[C@H]1C[C@H](O[C@H]([C@@H]1O[C@H]1C[C@H](OC)[C@H]([C@@H](O1)C)O)C)O[C@H]1[C@@H](C)/C=C/C=2COC3[C@@]2(O)C(C=C([C@H]3O)C)C(=O)OC2CC(C/C=C/1CO)O[C@]1(C2)C=C[C@@H]([C@H](O1)C)C)C</chem>                              | 850                     | No               |
| 1830                 | (3S,4'S,5R,5'S,6'R,7R,9E,11S,12S,13E,15E,16aS,18S,20aR)-3,3',4,4',5',6',7,8,11,12,16a,17,18,20a-Tetradecahydro-4',16a,18-trihydroxy-5',10,12,16,19-pentamethyl-1-oxo-6'-(propan-2-yl)-1H-Spiro[3,7-methano[2,6]benzodioxacyclooctadecine-5,2'-pyran]-11-yl 2,6-dideoxy-4-O-(2,6-dideoxy-3-O-methyl-alpha-L-arabino-hexopyranosyl)-3-O-methyl-alpha-L-arabino-hexopyranoside | <chem>COC1CC(OCC1OC1CC(OC)C(C(O1)C)O)O[C@H]1[C@@H](C)/C=C/C=C([C@]2(O)C[C@H](O)C(=C[C@H]2C(=O)O[C@H]2C[C@@H](C/C=C/1CO)O[C@]1(C2)C[C@H](O)[C@@H]([C@H](O1)C(C)C)C)C</chem>                                                 | 850                     | No               |
| 1831                 | Avermectin                                                                                                                                                                                                                                                                                                                                                                  | <chem>CO[C@H]1CC(O[C@H]([C@@H]1O[C@H]1C[C@H](OC)[C@H]([C@@H](O1)C)O)C)O[C@H]1C(C)/C=C/C=2COC3[C@@]2(O)C(C=C([C@H]3O)C)C(=O)OC2CC(C/C=C/1CO)OC1(C2)CC[C@@H](CO1)C</chem>                                                    | 850                     | No               |
| 1832                 | Avermectin A2b                                                                                                                                                                                                                                                                                                                                                              | <chem>CO[C@H]1C[C@H](O[C@H]([C@@H]1O[C@H]1C[C@H](OC)[C@H]([C@@H](O1)C)O)C)O[C@H]1[C@@H](C)/C=C/C=2CO[C@H]3[C@@]2(O)[C@@H](C=C([C@H]3O)C)C(=O)O[C@H]2C[C@@H](C/C=C/1CO)O[C@]1(C2)C[C@H](O)[C@@H]([C@H](O1)C)C)C</chem>      | 850                     | No               |
| 1833                 | Avermectin B2b                                                                                                                                                                                                                                                                                                                                                              | <chem>CO[C@H]1C[C@H](O[C@H]2[C@@H](C)/C=C/C=3CO[C@H]4[C@]3(O)[C@@H](C=C([C@H]4O)C)C(=O)O[C@H]3C[C@@H](C/C=C/2CO)O[C@]2(C3)C[C@H](O)[C@@H]([C@H](O2)C(C)C)C)O[C@H]1([C@@H]1O[C@H]1C[C@H](OC)[C@H]([C@@H](O1)C)O)C</chem>    | 850                     | No               |
| 1834                 | Avermectin B2a                                                                                                                                                                                                                                                                                                                                                              | <chem>CO[C@H]1C[C@H](O[C@H]2[C@@H](C)/C=C/C=3COC4[C@]3(O)C(C=C([C@H]4O)C)C(=O)OC3CC(C/C=C/2CO)O[C@]2(C3)C[C@H](O)[C@@H]([C@H](O2)C(CC)C)C)O[C@H]1([C@@H]1O[C@H]1C[C@H](OC)[C@H]([C@@H](O1)C)O)C</chem>                     | 850                     | No               |

| Comp No <sup>a</sup> | Name                                                | SMILES <sup>b</sup>                                                                                                                                                                                                                                       | Cluster No <sup>c</sup> | Rep <sup>d</sup> |
|----------------------|-----------------------------------------------------|-----------------------------------------------------------------------------------------------------------------------------------------------------------------------------------------------------------------------------------------------------------|-------------------------|------------------|
| 1835                 | Avermectin B(1)A                                    | <chem>CO[C@H]1C[C@H](O[C@H]2[C@@H](C)/C=C/C=3/COC4[C@]3(O)C(C=C([C@H]4O)C)C(=O)OC3CC(C/C=C/2/C)O[C@]2(C3)C=C[C@H](C(O2)[C@H](CC)C)O[C@H]([C@H]1O[C@H]1C[C@H](OC)[C@H]([C@H](O1)C)O)C</chem>                                                               | 850                     | Yes              |
| 1836                 | 13-Epi-Avm B(sub 2)                                 | <chem>CO[C@H]1C[C@H](O[C@H]2[C@@H](C)/C=C/C=3/COC4[C@]3(O)C(C=C([C@H]4O)C)C(=O)O[C@H]3C[C@H](C/C=C/2/C)O[C@]2(C3)C[C@H](O)[C@H]([C@H](O2)[C@H](CC)C)O[C@H]([C@H]1O[C@H]1C[C@H](OC)[C@H]([C@H](O1)C)O)C</chem>                                             | 850                     | No               |
| 1837                 | Okilactomycin                                       | <chem>CC1CCCC2C=C(C(=O)O)C(CC32C2OC(C(1)C)C(=C)C(=O)C2(C(=O)O3)C)C</chem>                                                                                                                                                                                 | 851                     | Yes              |
| 1838                 | Avermectin B1a 4"-beta-L-fucoside                   | <chem>CO[C@H]1C[C@H](O[C@H]([C@H]1O[C@H]1C[C@H](OC)[C@H]([C@H](O1)C)O[C@H]1O[C@H](CO)[C@H]([C@H]([C@H]1O)O)O)O)O[C@H]1C[C@H](C/C=C/C=2/COC[C@H]3C[C@]2(O)[C@H](C=C([C@H]3O)C)C(=O)O[C@H]2C[C@H](C/C=C/1/C)O[C@]1(C2)C=C[C@H]([C@H](O1)[C@H](CC)C)C</chem> | 852                     | Yes              |
| 1839                 | Avermectin B1a 4"-beta-D-galactoside                | <chem>CC[C@H]([C@H]1O[C@H]2C=C[C@H]1C)O[C@H]1C/C=C(C)/[C@H](O[C@H]3C[C@H](OC)[C@H]([C@H](O3)C)O[C@H]3C[C@H](OC)[C@H]([C@H](O3)CO)O)[C@H](C/C=C/C=C13/[C@]4([C@H](C(=O)O[C@H](C2)C1)C=C(C)[C@H]([C@H]4OC3)O)O)C</chem>                                     | 853                     | Yes              |
| 1840                 | Avermectin B1a 4"-beta-2-deoxy-D-glucoside          | <chem>CO[C@H]1C[C@H](O[C@H]([C@H]1O[C@H]1C[C@H](OC)[C@H]([C@H](O1)C)O[C@H]1O[C@H](C)[C@H]([C@H]([C@H]1O)O)O)O)O[C@H]1C[C@H](C/C=C/C=2/COC[C@H]3C[C@]2(O)[C@H](C=C([C@H]3O)C)C(=O)O[C@H]2C[C@H](C/C=C/1/C)O[C@]1(C2)C=C[C@H]([C@H](O1)[C@H](CC)C)C</chem>  | 854                     | Yes              |
| 1841                 | 3"-O-Demethylavermectin A2a                         | <chem>CCC(C1OC2(OC3C/C=C(C)/C(OC4CC(O)C(C(O4)C)OC4CC(O)C(C(O4)C)O)C(C)/C=C/C=C4/C5(C(C(=O)OC(C2)C3)C=C(C)C(C5OC4)O)O)CC(C1C)O)C</chem>                                                                                                                    | 855                     | Yes              |
| 1842                 | Fusicomycin B                                       | <chem>CCCC(=O)[C@H]([C@H]1O[C@]([O])([C@H]1C[C@H]1C)C)[C@H](C(=O)OC[C@H]([C@H]1CC[C@]2(C1=CC[C@](C)(O)[C@H]1C[C@H](C2)[C@H](CO)C[C@H]1O)C)C)C</chem>                                                                                                      | 856                     | Yes              |
| 1843                 | Fusicomycin A                                       | <chem>OC[C@H]1C[C@H]([C@H]2[C@H]1C[C@H]1C[C@]1(C)CC[C@H](C1=CC[C@]2(C)O)[C@H](C(OC(=O)[C@H]([C@]1(O)O)[C@H]([C@H]1C)C)[C@H](C(=O)CC)C)C)O</chem>                                                                                                          | 856                     | No               |
| 1844                 | Isofusicomycin A                                    | <chem>OC[C@H]1C[C@H]([C@H]2[C@H]1C[C@H]1C[C@]1(C)CC[C@H](C1=CC[C@]2(C)O)[C@H](C(OC(=O)[C@H]([C@]1(O)O)[C@H]([C@H]1C)C)[C@H](C(=O)CC)C)C)O</chem>                                                                                                          | 856                     | No               |
| 1845                 | 17-Dihydroxycyclooctatin                            | <chem>CCCC(=O)C(C1OC(O)C(CC1C)C)C(C(=O)OCC([C@H]1CC[C@]2(C1=CC[C@](C)(O)[C@H]1[C@H](C2)[C@H](CO)C[C@H]1O)C)CO)C</chem>                                                                                                                                    | 856                     | No               |
| 1846                 | 17-[16,17-Dihydroxycyclooctatynyl]-hexaketide ester | <chem>CCCC(=O)C(C1OC(O)C(CC1C)C)C(C(=O)OC[C@H]([C@H]1CC[C@]2(C1=CC[C@](C)(O)[C@H]1[C@H](C2)[C@H](C2)[C@H](CO)C[C@H]1O)C)CO)C</chem>                                                                                                                       | 856                     | No               |
| 1847                 | Cucurbitacin B                                      | <chem>CC(=O)OC/C=C/C(=O)[C@]([C@H]1[C@H](O)C[C@]2([C@]1(C)CC(=O)[C@]1([C@H]2CC=C2[C@H]1C[C@H](O)C(=O)C2(C)C)C)O)C)C</chem>                                                                                                                                | 857                     | Yes              |
| 1848                 | Cucurbitacin B 2-o-beta-D-glucoside                 | <chem>OC[C@H]1O[C@H](O[C@H]2C[C@H]3C[C@]4(C)C(=O)C[C@]5([C@]([C@H]4CC=C3C(C2=O)(C)C)C)C[C@H]([C@H]5[C@](C(=O)C=C(C(OC(=O)C)(C)C)O)C)[C@H]([C@H]([C@H]1O)O)O</chem>                                                                                        | 858                     | Yes              |
| 1849                 | 13-Deoxytetradecamycin                              | <chem>C=C1OC(=O)C2=C1O[C@H]1[C@H](O)[C@H]3[C@H]([C@](C2=O)([C@H]1C)C)CCCC3</chem>                                                                                                                                                                         | 859                     | Yes              |
| 1850                 | Milbemycin F                                        | <chem>CC1/C=C/C=2/COC3C2(O)C(C=C(C3O)COC(=O)c2ccc[nH]2)C(=O)OC2CC(C/C=C(C1C)/C)OC1(C2)CCC(C(O1)C(C)C)C</chem>                                                                                                                                             | 860                     | Yes              |
| 1851                 | Milbemycin H                                        | <chem>CC1/C=C/C=C(C)/C2(O)CC(=O)C(CC2C(=O)OC2CC(C/C=C(C1C)/C)OC1(C2)CCC(C(O1)C(C)C)C)C</chem>                                                                                                                                                             | 861                     | Yes              |
| 1852                 | AG-F-74879                                          | <chem>CCC1OC2(CCC1C)CC1CC(O2)CC=C(C)CC(C)C=CC=C2C3(C(C(=O)O1)C=C(C)C(C3OC2)O)O</chem>                                                                                                                                                                     | 862                     | No               |
| 1853                 | 4-Hydroxy-delta-2,3-milbemycin A4                   | <chem>CCC[C@H]1O[C@]2(CC[C@H]1C)C[C@H]1C[C@H](O2)C/C=C(C)/C[C@H](C)/C=C/C=C2/C3C(=C[C@](C)(O)[C@H](C3OC2)O)C(=O)O1</chem>                                                                                                                                 | 862                     | Yes              |
| 1854                 | 4-Hydroxy-delta-2,3-milbemycin A3                   | <chem>CC[C@H]1O[C@]2(CC[C@H]1C)C[C@H]1C[C@H](O2)C/C=C(C)/C[C@H](C)/C=C/C=C2/C3C(=C[C@](C)(O)[C@H](C3OC2)O)C(=O)O1</chem>                                                                                                                                  | 862                     | No               |
| 1855                 | 27-Methoxymilbemycin alpha 31                       | <chem>CC[C@H]1O[C@]2(CC[C@H]1C)C[C@H]1C[C@H](O2)C/C=C(C)/C[C@H](C)/C=C/C=C2/c3c(C(=O)O1)cc(C)c(c3OC2OC)O</chem>                                                                                                                                           | 862                     | No               |
| 1856                 | Milbemycin A4                                       | <chem>CC[C@H]1O[C@]2(CC[C@H]1C)C[C@H]1C[C@H](O2)C/C=C(C)/C[C@H](C)/C=C/C=C2/[C@]3([C@H](C(=O)O1)C=C(C)[C@H]([C@H]3OC2)O)O</chem>                                                                                                                          | 863                     | Yes              |
| 1857                 | Milbemycin alpha-2                                  | <chem>CO[C@H]1C(=CC2[C@]3([C@H]1OC/C3=C1C=C[C@H](C)C/C(=C/C[C@H]1C[C@H](OC2=O)C[C@]2(O1)CC[C@H]([C@H](O2)C)C)C)O)C</chem>                                                                                                                                 | 864                     | No               |
| 1858                 | C5-O-Methylmilbemycin B2                            | <chem>COC1C(=C[C@H]2[C@]3(C1OC/C3=C1C=C(C)C/C(=C/C[C@H]1C[C@H](OC2=O)C[C@]2(O1)CC[C@H]([C@H](O2)C)C)C)O)C</chem>                                                                                                                                          | 864                     | No               |
| 1859                 | Milbemycin A3                                       | <chem>C[C@H]1C=C/C=C/2/COC[C@H]3C[C@]2(O)[C@H](C=C([C@H]3O)C)C(=O)O[C@H]2C[C@H](C/C=C(C1)C)O[C@]1(C2)CC[C@H]([C@H](O1)C)C</chem>                                                                                                                          | 864                     | No               |
| 1860                 | VM-44857                                            | <chem>C/C=C([C@H]1O[C@]2(CC[C@H]1C)CC1CC(O2)C/C=C(C)/C[C@H](C)/C=C/C=C2/[C@]3(C(C(=O)O1)C=C(C)[C@H](C3OC2)O)O)C</chem>                                                                                                                                    | 864                     | No               |
| 1861                 | Milbemycin B2                                       | <chem>CO[C@H]1C(=C[C@H]2[C@]3([C@H]1OC/C3=C1C=C[C@H](C)C/C(=C/C[C@H]1C[C@H](OC2=O)C[C@]2(O1)CC[C@H]([C@H](O2)C)C)C)O)C</chem>                                                                                                                             | 864                     | Yes              |
| 1862                 | Milbemycin beta2                                    | <chem>CCC1OC2(CCC1C)CC1CC(O2)C/C=C(C)/CC(C)/C=C/C=C(C1C(C(=O)O1)C=C(C)C(C2)OC)O)/C</chem>                                                                                                                                                                 | 864                     | No               |

| Comp No <sup>a</sup> | Name                                                                                | SMILES <sup>b</sup>                                                                                                                                                                                 | Cluster No <sup>c</sup> | Rep <sup>d</sup> |
|----------------------|-------------------------------------------------------------------------------------|-----------------------------------------------------------------------------------------------------------------------------------------------------------------------------------------------------|-------------------------|------------------|
| 1863                 | C5-O-Methylmilbemycin B2                                                            | <chem>CC[C@H]1O[C@]2(CC[C@H]1C)C[C@H]1C[C@H](O2)C/C=C(\C)/CC(C)/C=C/C=C/[C@]2([C@H](C(=O)O1)C=C(C)C[C@H](C2)OC)O)CO</chem>                                                                          | 864                     | No               |
| 1864                 | Milbemycin J                                                                        | <chem>CC1/C=C/C=C/2COC3C2(O)C(C=C(C3=O)C)C(=O)OC2CC(C/C=C(\C1)/C)OC1(C2)CCC(C(O1)C)C</chem>                                                                                                         | 865                     | No               |
| 1865                 | 5-Oxomilbemycin A4                                                                  | <chem>CC[C@H]1O[C@]2(CC[C@H]1C)C[C@H]1C[C@H](O2)C/C=C(\C)/C[C@H](C)/C=C/C=C\2/[C@]3([C@H](C(=O)O1)C=C(C)C(=O)[C@H]3OC2)O</chem>                                                                     | 865                     | Yes              |
| 1866                 | Milbemycin K                                                                        | <chem>CCC1OC2(CCC1C)CC1CC(O2)C/C=C(\C)CC(C)/C=C/C=C\2/C3(C(C(=O)O1)C=C(C)C(=O)C3OC2)O</chem>                                                                                                        | 865                     | No               |
| 1867                 | Avermectin A1b aglycone                                                             | <chem>CO[C@@H]1C(=C[C@@H]2[C@]3([C@@H]1OC/C3=C\C=C\C[C@H](C)[C@H](O)/C(=C/C[C@@H]1C[C@H](OC2=O)C[C@@]2(O1)C=C[C@@H]([C@H](O2)C(C)C)/C)O)C</chem>                                                    | 866                     | Yes              |
| 1868                 | Milbemycin beta1                                                                    | <chem>CO[C@H]1C[C@]2(O)/C(=C\C=C\C[C@H](C)C/C(=C/C[C@H]3C[C@H](OC(=O)[C@@H]2C=C1C)C[C@@]1(O3)CC[C@@H]([C@H](O1)C)C)/C)CO</chem>                                                                     | 867                     | Yes              |
| 1869                 | C5-O-Methylmilbemycin B1                                                            | <chem>CO[C@H]1C[C@]2(O)/C(=C\C=C\C(C)C/C(=C/C[C@@H]3C[C@H](OC(=O)[C@@H]2C=C1C)C[C@@]1(O3)CC[C@@H]([C@H](O1)C)C)/C)CO</chem>                                                                         | 867                     | No               |
| 1870                 | Milbemycin D                                                                        | <chem>C[C@H]1/C=C/C=C/2COC[C@H]3[C@]2(O)[C@@H](C=C([C@H]3O)C)C(=O)O[C@H]2C[C@@H](C/C=C(\C1)C)O[C@]1(C2)CC[C@@H]([C@H](O1)C)C)C</chem>                                                               | 868                     | No               |
| 1871                 | Milbemycin B3                                                                       | <chem>CO[C@@H]1C(=C[C@@H]2[C@]3([C@@H]1OC/C3=C\C=C\C[C@H](C)C/C(=C/C[C@@H]1C[C@H](OC2=O)C[C@@]2(O1)CC[C@@H]([C@@]2(O)CC(C)C)/C)O)C</chem>                                                           | 868                     | Yes              |
| 1872                 | VM 44866                                                                            | <chem>C/C=C([C@H]1O[C@@]2(CC3CC(O2)C/C=C(\C)/C[C@H](C)/C=C/C=C\2/[C@]4(C(C(=O)O3)C=C(C)[C@H](C4OC2)O)O)[C@H](C[C@@H]1C)O)C</chem>                                                                   | 868                     | No               |
| 1873                 | Milbemycin E                                                                        | <chem>COC1CC2(O)/C(=C\C=C\C(C)C/C(=C\CC3CC(OC(=O)C2C=C1C)CC1(O3)CCC(C(O1)C(C)C)/C)/CO</chem>                                                                                                        | 869                     | No               |
| 1874                 | Nemadectin gamma                                                                    | <chem>CO[C@H]1C(=C[C@H]2[C@@]3([C@H]1OC/C3=C\C=C\C[C@H](C)C/C(=C/C[C@H]1C[C@H](OC2=O)C[C@@]2(O1)C[C@@H](O)[C@H]([C@@H](O2)/C(=C/C)/C)C)/C)O)C</chem>                                                | 869                     | No               |
| 1875                 | C5-O-Methylmilbemycin B3                                                            | <chem>CC[C@H]1O[C@]2(CC[C@H]1C)C[C@H]1C[C@H](O2)C/C=C(\C)/CC(C)/C=C/C=C\2/[C@]3([C@H](C(=O)O1)C=C(C)C(C3OC2)OC)O</chem>                                                                             | 869                     | No               |
| 1876                 | Milbemycin G                                                                        | <chem>CO[C@@H]1C(=C[C@@H]2[C@]3([C@@H]1OC/C3=C\C=C\C[C@H](C)C/C(=C/C[C@@H]1C[C@H](OC2=O)C[C@@]2(O1)CC[C@@H](C(O2)C(C)C)/C)O)C</chem>                                                                | 869                     | Yes              |
| 1877                 | LL-F 28249lambda                                                                    | <chem>CO[C@@H]1C(=CC2[C@]3(C1OC/C3=C\C=C\C[C@H](C)C/C(=C/CC1CC(OC2=O)CC2(O1)C[C@H](O)[C@@H]([C@H](O2)/C(=C/C(C)C)/C)C)/C)O)C</chem>                                                                 | 870                     | Yes              |
| 1878                 | LL-F 28249gamma                                                                     | <chem>CO[C@@H]1C(=CC2[C@]3(C1OC/C3=C\C=C\C[C@H](C)C/C(=C/CC1CC(OC2=O)CC2(O1)C[C@H](O)[C@@H]([C@H](O2)/C(=C/C)/C)C)/C)O)C</chem>                                                                     | 871                     | Yes              |
| 1879                 | LL-F 28249beta                                                                      | <chem>C/C=C([C@H]1OC2(CC3CC(O2)C/C=C(\C)/C[C@@H](C)/C=C/C=C\2/[C@]4(C(C(=O)O3)C=C(C)[C@H](C4OC2)O)O)[C@H](C[C@@H]([C@@H]1C)O)C</chem>                                                               | 872                     | Yes              |
| 1880                 | Nemadectin                                                                          | <chem>CC(C=C([C@H]1OC2(CC3CC(O2)C/C=C(\C)/C[C@H](C)/C=C/C=C\2/[C@]4(C(C(=O)O3)C=C(C)[C@H](C4OC2)O)O)[C@H](C[C@@H]([C@@H]1C)O)C)C</chem>                                                             | 872                     | No               |
| 1881                 | 13alpha-Hydroxy milbemycin beta11                                                   | <chem>O[C@@H]1/C(=C/C[C@@H]2C[C@H](OC(=O)[C@H]3[C@@]/C(=C/C=C/[C@@H]1C)/C(O)[C@H](O)[C@H](O)C(=C3)C)[C@@]1(O2)CC[C@@H]([C@H](O1)C)C)/C</chem>                                                       | 873                     | Yes              |
| 1882                 | Aplasmomycin                                                                        | <chem>[B-]123O[C@]45O[C@H](C([C@@H](C/C=C/C[C@H]6O[C@H]([C@H](C6)OC(=O)[C@H](O1)[C@]7(O2)O[C@H](C([C@@H](C/C=C/C[C@H]8O[C@@H]([C@H](C8)OC(=O)[C@@H]4O3)C)O)(C)C)[C@H]7C)O)(C)C)[C@H]5C.[Na+]</chem> | 874                     | Yes              |
| 1883                 | Lucensimycin A                                                                      | <chem>OC(=O)/C=C/C=C/C=C/C1CC2C=CC3C(C2(C(=O)C21C(=O)OC(=C)C2=O)C)CC(C(C3O)C)OC(=O)C</chem>                                                                                                         | 875                     | Yes              |
| 1884                 | Lucensimycin B                                                                      | <chem>OCC1OC(=O)C2(C1=O)C/C=C/C=C/C=C(C(=O)C)CC1C(C2=O)(C)C2CC(OC(=O)C)C(C(C2C=C1)O)C</chem>                                                                                                        | 875                     | No               |
| 1885                 | Soraphen A                                                                          | <chem>CO[C@@H]1/C=C/[C@H](C)C2O[C@](O)([C@H](C)C(=O)O[C@@H](CCCC[C@H]1OC)c1cccc1)[C@@H]([C@H]([C@@H]2C)O)OC</chem>                                                                                  | 876                     | Yes              |
| 1886                 | 3'-O-Decarbamoylirumamycin                                                          | <chem>CCC(=O)C1(C)OC1C(CC(C1OC(=O)CC2(O)CC=C(C(O2)/C(=C/CCCC/C=C/C(C(C1C)O)C)OC1CC(O)C(C(O1)C)O)/C)C)C</chem>                                                                                       | 877                     | Yes              |
| 1887                 | Irumamycin                                                                          | <chem>CCC(=O)C1(C)OC1C(CC(C1OC(=O)CC2(O)CC=C(C(O2)/C(=C/CCCC/C=C/C(C(C1C)O)C)OC1OC(C)C(C(C1)OC(=O)N)O)/C)C)C</chem>                                                                                 | 877                     | No               |
| 1888                 | Venturicidin A                                                                      | <chem>CCC(=O)[C@H]([C@H]([C@@H](C[C@H]([C@H]1OC(=O)C[C@@]2(O)CC=C([C@H](O2)/C(=C/CC[C@H](C/C=C/[C@@H](C[C@H]1C)O)[C@@H]1O[C@H](C)[C@H]([C@@H](C1)OC(=O)N)O)/C)C)C)O)C</chem>                        | 878                     | Yes              |
| 1889                 | Aabomycin A1                                                                        | <chem>CCC(=O)[C@H]([C@H]([C@@H](C[C@H](C1OC(=O)C[C@@]2(O)CC=C(C(O2)/C(=C/CCC[C@H](C/C=C/[C@@H](C[C@H]1C)O)[C@@H]1O)[C@H]([C@H](O1)C)O)/C)C)C)O)C</chem>                                             | 879                     | Yes              |
| 1890                 | 2alpha,5alpha,14beta-Triacetox-10-hydroxy-10alpha,18-epoxytaxa-4(20),11-diene-9-one | <chem>CC(=O)O[C@H]1CC[C@@]2([C@@H](C1=C)[C@H](OC(=O)C)[C@@H]1[C@@H](OC(=O)C)CC3=C([C@](C2=O)(O)OC3)C1(C)C)C</chem>                                                                                  | 880                     | No               |
| 1891                 | 2alpha,5alpha,14beta-Triacetox-9beta-hydroxytaxa-4(20),11-diene-10-one              | <chem>CC(=O)O[C@H]1CC[C@@]2([C@@H](C1=C)[C@H](OC(=O)C)[C@@H]1[C@@H](OC(=O)C)CC(=C(C(=O)[C@H]2O)C1(C)C)C)C</chem>                                                                                    | 880                     | Yes              |

| Comp No <sup>a</sup> | Name                                                                        | SMILES <sup>b</sup>                                                                                                                   | Cluster No <sup>c</sup> | Rep <sup>d</sup> |
|----------------------|-----------------------------------------------------------------------------|---------------------------------------------------------------------------------------------------------------------------------------|-------------------------|------------------|
| 1892                 | 2alpha,5alpha,14beta-Triacetox-9beta,18-dihydroxytaxa-4(20),11-diene-10-one | <chem>OCC1=C2C(=O)[C@H](O)[C@H]3[C@H]([C@@H]([C@H]([C@H](C1)OC(=O)C)C2(C)C)OC(=O)C)C(=C)[C@H](CC3)OC(=O)C</chem>                      | 880                     | No               |
| 1893                 | Cochleamycin A                                                              | <chem>O[C@H]1C[C@H]2CC(=O)/C=C/[C@H]3[C@H]([C@H]1)C=C[C@H]1[C@H]3C[C@H]([C@H]1OC(=O)C)C/C(=O)O2</chem>                                | 881                     | Yes              |
| 1894                 | Cochleamycin A2                                                             | <chem>O[C@H]1C[C@H]2CC(=O)/C=C/[C@H]3[C@H]([C@H]1)C=C[C@H]1[C@H]3C[C@H]([C@H]1OC(=O)C)C/C(=O)O2</chem>                                | 881                     | No               |
| 1895                 | Cochleamycin B                                                              | <chem>CC(=O)O[C@H]1[C@H](C)C[C@H]2[C@H]1C=C[C@H]1[C@H]2C[C@H]23C(C1)C[C@H](CC2=O)OC3=O</chem>                                         | 882                     | Yes              |
| 1896                 | Cochleamycin B2                                                             | <chem>CC(C(=O)O[C@H]1[C@H](C)C[C@H]2[C@H]1C=C[C@H]1[C@H]2C[C@H]23C(C1)C[C@H](CC2=O)OC3=O)C</chem>                                     | 882                     | No               |
| 1897                 | Cyclostreptin                                                               | <chem>O[C@H]1[C@H]([C@H](C)[C@H]1C2C1C1C(C(=C2)C)CC2C1C1=C3O[C@H]2(C)CCC(OC1=O)[C@H]3C)O</chem>                                       | 883                     | Yes              |
| 1898                 | Nargenicin A1                                                               | <chem>COC1CC2C=CC3C4C2(OC3C(C(C4O)C)OC(=O)c2ccc[nH]2)C(=CC(C(OC1=O)C(O)C)C)C</chem>                                                   | 884                     | Yes              |
| 1899                 | Pteridic acid G                                                             | <chem>CC[C@H]1[C@H](O)C[C@H]2O[C@H]1C)O[C@H]([C@H]1/C=C/C=C(=O)OC)C[C@H]([C@H]1[C@H]2C)O)C</chem>                                     | 885                     | Yes              |
| 1900                 | Pteridic acid F                                                             | <chem>CC[C@H]1[C@H](O)C[C@H]2O[C@H]1C)O[C@H]([C@H]1/C=C/C=C(=O)O)C[C@H]([C@H]1[C@H]2C)O)C</chem>                                      | 885                     | No               |
| 1901                 | Pteridic acid C                                                             | <chem>CC[C@H]1[C@H](O)C[C@H]2O[C@H]1C)O[C@H]([C@H]1/C=C/C(=O)O)C[C@H]([C@H]1[C@H]2C)O)C</chem>                                        | 885                     | No               |
| 1902                 | Pteridic acid E                                                             | <chem>OC(=O)/C=C/C=C/[C@H]([C@H]1O[C@H]2C[C@H]1O)[C@H]([C@H]1O2)C)C[C@H]([C@H]1[C@H]2C)O)C</chem>                                     | 886                     | Yes              |
| 1903                 | Pteridic acid D                                                             | <chem>OC(=O)/C=C/[C@H]([C@H]1O[C@H]2C[C@H]1O)[C@H]([C@H]1O2)C)C[C@H]([C@H]1[C@H]2C)O)C</chem>                                         | 886                     | No               |
| 1904                 | Hookerolide                                                                 | <chem>O[C@H]1C[C@H]2O[C@H]3(C=C[C@H]2C)O[C@H](C/C=C/C(=O)O[C@H]1[C@H]2C)C(=O)C1C(C(C)C)C)C[C@H]([C@H]1[C@H]3C)O)C</chem>              | 887                     | Yes              |
| 1905                 | Ikarugamycin                                                                | <chem>CC[C@H]1[C@H](C)C[C@H]2[C@H]1C=C[C@H]1[C@H]2C[C@H]2[C@H]1C/C=C/C(=O)NCCC[C@H]1C(=O)C(=C(C=C2)O)/C(=O)N1</chem>                  | 888                     | Yes              |
| 1906                 | Capsimycin                                                                  | <chem>COC([C@H]1[C@H](C)C[C@H]2[C@H]1[C@H]1O[C@H]1[C@H]1[C@H]2C[C@H]2[C@H]1C/C=C/C(=O)NCCC[C@H]1C(=O)C(=C(C=C2)O)/C(=O)N1)C</chem>    | 889                     | Yes              |
| 1907                 | 28-N-Methylkarugamycin                                                      | <chem>CC[C@H]1[C@H](C)C[C@H]2[C@H]1C=C[C@H]1[C@H]2C[C@H]2[C@H]1C/C=C/C(=O)NCCC[C@H]1C(=O)C(=C(C=C2)O)/C(=O)N1C</chem>                 | 890                     | Yes              |
| 1908                 | Aburatubolactam C                                                           | <chem>CCC1CC2C(C1C)CC1C2C(=O)/C=C/C=C(=O)NCCCC2C(=C(C(=O)CC/C=C1)C(=O)N2C)O</chem>                                                    | 891                     | Yes              |
| 1909                 | Aburatubolactam B                                                           | <chem>CCC1CC2C(C1C)CC1C2C(=O)/C=C/C=C(=O)NCCCC(C2C(=C(C(=O)CC/C=C1)C(=O)N2C)O)O</chem>                                                | 892                     | Yes              |
| 1910                 | Xanthobaccin C                                                              | <chem>CC[C@H]1C[C@H]2[C@H]([C@H]1C)[C@H]1[C@H](C2)[C@H]2C/C=C/C(=O)NCCCC3C(=O)C(=C(C=C/[C@H]2C[C@H]1O)O)C(=O)N3</chem>                | 893                     | No               |
| 1911                 | FI-3                                                                        | <chem>C=C[C@H]1C[C@H]2[C@H]([C@H]1C)[C@H]1[C@H](C2)[C@H]2C/C=C/C(=O)NCCCC3C(=O)C(=C(C=C/[C@H]2C[C@H]1O)O)C(=O)N3</chem>               | 893                     | Yes              |
| 1912                 | Dihydromaltophilin                                                          | <chem>CC[C@H]1C[C@H]2[C@H]([C@H]1C)[C@H]1[C@H](C2)[C@H]2C/C=C/C(=O)NCCCC(C3C(=O)C(=C(C=C/[C@H]2C[C@H]1O)O)C(=O)N3)O</chem>            | 893                     | No               |
| 1913                 | Heat-stable antifungal factor                                               | <chem>CC[C@H]1C[C@H]2[C@H]([C@H]1C)[C@H]1[C@H](C2)[C@H]2C/C=C/C(=O)NCCCC(C3C(=O)C(=C(C=C/[C@H]2C[C@H]1O)O)C(=O)N3)O</chem>            | 893                     | No               |
| 1914                 | Alteramide A                                                                | <chem>CC[C@H]1C[C@H]2[C@H]([C@H]1C)[C@H]1[C@H](C2)/C=C/C=C(=O)NCC[C@H]([C@H]2C(=O)/C(=C(C=C/C/[C@H]1O)O)/C(=O)N2)O</chem>             | 893                     | No               |
| 1915                 | delta30-Dihydromaltophilin                                                  | <chem>C=C[C@H]1C[C@H]2[C@H]([C@H]1C)[C@H]1[C@H](C2)[C@H]2C/C=C/C(=O)NCCCC(C3C(=O)C(=C(C=C/[C@H]2C[C@H]1O)O)C(=O)N3)O</chem>           | 893                     | No               |
| 1916                 | Maltophilin                                                                 | <chem>CCC1CC2C(C1C)C1C(C2)C2C/C=C/C(=O)NCCCC(C3C(=O)C(=C(C=C/C2CC1=O)O)/C(=O)N3)O</chem>                                              | 894                     | Yes              |
| 1917                 | 10-epi-HSAF                                                                 | <chem>CC[C@H]1C[C@H]2[C@H]([C@H]1C)[C@H]1[C@H](C2)[C@H]2C/C=C/C(=O)NCC[C@H]([C@H]3C(=C(C(=O)/C=C/[C@H]2C[C@H]1O)C(=O)N3)O)O</chem>    | 895                     | Yes              |
| 1918                 | Capsimycin F                                                                | <chem>CO[C@H]1[C@H]([C@H]2[C@H]3C/C=C/C(=O)NCCC[C@H]4C(=C(C(=O)/C=C/[C@H]3C[C@H]2[C@H]2[C@H]1[C@H](CC)[C@H](C2)C)C(=O)N4)O</chem>     | 895                     | No               |
| 1919                 | 10-epi-Maltophilin                                                          | <chem>CC[C@H]1C[C@H]2[C@H]([C@H]1C)[C@H]1[C@H](C2)[C@H]2C/C=C/C(=O)NCC[C@H]([C@H]3C(=C(C(=O)/C=C/[C@H]2CC1=O)C(=O)N3)O)O</chem>       | 895                     | No               |
| 1920                 | 10-epi-FI-2                                                                 | <chem>CC[C@H]1C[C@H]2[C@H]([C@H]1C)[C@H]1[C@H](C2)[C@H]2C/C=C/C(=O)NCCC[C@H]3C(=C(C(=O)/C=C/[C@H]2CC1=O)C(=O)N3)O</chem>              | 895                     | No               |
| 1921                 | 6-epi-Alteramide A                                                          | <chem>CCC1CC2C([C@H]1C)[C@H]1[C@H](C2)/C=C/C=C(=O)NCC[C@H](C2C(=C(C(=O)/C=C/C=C/[C@H]1O)C(=O)N2)O)O</chem>                            | 895                     | No               |
| 1922                 | 6-epi-Alteramide B                                                          | <chem>CCC1CC2C([C@H]1C)[C@H]1[C@H](C2)/C=C/C=C(=O)NCCCC2C(=C(C(=O)/C=C/C=C/[C@H]1O)C(=O)N2)O</chem>                                   | 895                     | No               |
| 1923                 | Capsimycin G                                                                | <chem>O=C1NCCC[C@H]2NC(=O)C(=C2O)C(=O)/C=C/[C@H]2[C@H](C/C=C1)[C@H]1[C@H](C2)[C@H]2C[C@H]([C@H]1[C@H]2[C@H]2[C@H]1O2)[C@H](O)C</chem> | 895                     | No               |

| Comp No <sup>a</sup> | Name                                                    | SMILES <sup>b</sup>                                                                                                                    | Cluster No <sup>c</sup> | Rep <sup>d</sup> |
|----------------------|---------------------------------------------------------|----------------------------------------------------------------------------------------------------------------------------------------|-------------------------|------------------|
| 1924                 | Capsimycin B                                            | <chem>CC[C@@H]1[C@H](C)C[C@H]2[C@H]1[C@H]1O[C@H]1[C@H]1[C@@H]2C[C@@H]2[C@@H]1C/C=C/C(=O)NCCC[C@@H]1C(=C(C(=O)/C=C2)C(=O)N1)O</chem>    | 895                     | No               |
| 1925                 | 10-epi-deOH-HSAF                                        | <chem>CC[C@H]1C[C@H]2[C@H]1[C@@H]1C[C@@H]1[C@@H]2C/C=C/C(=O)NCCC[C@@H]3C(=C(C(=O)/C=C/[C@H]2[C@H]1O)C(=O)N3)O</chem>                   | 896                     | Yes              |
| 1926                 | 10-epi-Hydroxymaltophilin                               | <chem>CC[C@H]1C[C@H]2[C@H]1[C@@H]1C(=O)[C@H]1[C@@H]1[C@@H]2C/C=C/C(=O)NCC[C@@H]1[C@@H]3C(=C(C(=O)/C=C/[C@H]2CC1=O)C(=O)N3)O</chem>     | 897                     | Yes              |
| 1927                 | Ikarugamycin epoxide                                    | <chem>COC(C1C(C)CC2C3C1OC1C2C1C(C3)C=CC(=O)C2=C(O)C(NC2=O)CCNC(=O)C=CC1)C</chem>                                                       | 898                     | Yes              |
| 1928                 | Capsimycin C                                            | <chem>CC[C@@H]1[C@H](C)C[C@H]2[C@H]1[C@H](O)[C@H]1[C@@H]1[C@@H]2C[C@@H]2[C@@H]1C/C=C/C(=O)NCCC[C@@H]1C(=C(C(=O)/C=C2)C(=O)N1)O</chem>  | 899                     | Yes              |
| 1929                 | Indotertine B                                           | <chem>O=CN1c2ccccc2[C@H]2[C@H]1C=C1CC[C@@H]3[C@H]1[C@@H]1C2(C)CCCC3(C)C[C@H]1N(C(=O)[C@@H](N(C1=O)C)C)C</chem>                         | 900                     | Yes              |
| 1930                 | Carmabin A                                              | <chem>C#CCCCC(CC(C(=O)N([C@H](C(=O)N[C@H](C(=O)N([C@H](C(=O)N([C@H](C(=O)N)Cc1ccc(cc1)OC)C)C)C)Cc1ccccc1)C)C)C</chem>                  | 901                     | Yes              |
| 1931                 | Provi peptide A                                         | <chem>CC(C[C@H]1NC(=O)[C@H]2CCCN2C(=O)[C@@H](NC(=O)[C@@H]2N(C1=O)CCC2)Cc1ccccc1)C</chem>                                               | 902                     | Yes              |
| 1932                 | Provi peptide B                                         | <chem>CCC(C1NC(=O)C2CCCN2C(=O)C(NC(=O)C2N(C1=O)CCG2)Cc1ccccc1)C</chem>                                                                 | 902                     | No               |
| 1933                 | Aspergilazine A                                         | <chem>O=C1N[C@@H](Cc2c[nH]c3c2ccc(c3)n2cc(c3c2cccc3)C[C@H]2NC(=O)[C@H]3N(C2=O)CCC3)C(=O)N2[C@H]1CCC2</chem>                            | 903                     | Yes              |
| 1934                 | Naseseazine A                                           | <chem>O=C1N[C@H](Cc2c[nH]c3c2ccc(c3)[C@@H]23C[C@H]4N([C@@H]2Nc2c3cccc2)C(=O)[C@@H]2N(C4=O)CCC2)C(=O)N2[C@@H]1CCC2</chem>               | 903                     | No               |
| 1935                 | (-)-Lansai B                                            | <chem>C=CC(c1ccc2c(c1)[C@H]1(C)C[C@@H]3N([C@@H]1N2C)C(=O)[C@H]1N(C3=O)[C@@H]2N(C)c3c([C@H]2)C1(C)CCCC3)C)C</chem>                      | 904                     | Yes              |
| 1936                 | (+)-Nocardioazine B                                     | <chem>CC(=CC[C@H]12C[C@@H]3N([C@@H]2N(c2c1ccccc2)C)C(=O)[C@H]1N(C3=O)[C@H]2Nc3c([C@H]2)C1(C)CCCC3)C</chem>                             | 904                     | No               |
| 1937                 | Drimentine H                                            | <chem>O=CN1c2ccccc2[C@H]2[C@@H]1N1C(=O)[C@H](C(C)C)N(C(=O)[C@@H]1C2)C[C@H]1C(=C)C[C@H]2[C@H]1(C)CCCC2(C)C</chem>                       | 905                     | No               |
| 1938                 | Drimentine F                                            | <chem>O=C1N(C)[C@@H](C(C)C)C(=O)N2[C@H]1CC1([C@H]2Nc2c1ccccc2)C[C@H]1C(=C)CC[C@@H]2[C@H]1(C)CCCC2(C)C</chem>                           | 905                     | Yes              |
| 1939                 | Drimentine C                                            | <chem>O=C1N2CCC[C@H]2C(=O)N2[C@H]1C[C@@H]1([C@H]2Nc2c1ccccc2)C[C@H]1C(=C)CC[C@@H]2[C@H]1(C)CCCC2(C)C</chem>                            | 905                     | No               |
| 1940                 | Drimentine G                                            | <chem>CC([C@@H]1NC(=O)[C@H]2N(C1=O)[C@@H]1Nc3c(C1(C2)C[C@H]1C(=C)CC[C@@H]2[C@H]1(C)CCCC2(C)C)cccc3)C</chem>                            | 905                     | No               |
| 1941                 | Drimentine I                                            | <chem>CC([C@@H]1N(C)C(=O)[C@H]2N(C1=O)[C@@H]1N3c4c([C@@H]1(C2)C[C@H]1[C@@H]3)CC[C@@H]2[C@H]1(C)CCCC2(C)C)cccc4)C</chem>                | 905                     | No               |
| 1942                 | C12177                                                  | <chem>CO[C@@H]1/C=C/C=C(\C)/Cc2cc(NC(=O)C[C@H]1/C=C/C[C@@H]1([C@H](CC1=O)O)C)O)cc(c2)O</chem>                                          | 906                     | Yes              |
| 1943                 | Ansatrienol J                                           | <chem>CO[C@H]1CC(=O)Nc2cc(CC/C=C/[C@H]1[C@H](C(=O)/C=C/C=C/C[C@@H]1O)C)O)C)cc(c2)O</chem>                                              | 907                     | Yes              |
| 1944                 | 17-Demethoxy-reblastatin                                | <chem>C[C@H]1C2cc(cc(c2)O)NC(=O)/C(=C/CC[C@H]1[C@H](C(=O)/C=C/[C@@H]1[C@H](C1)O)O)C)O)C)C</chem>                                       | 908                     | Yes              |
| 1945                 | 17-Demethoxy-15-hydroxyreblastatin                      | <chem>Oc1cc2NC(=O)/C(=C/CC[C@H](C)[C@H](C(=O)/C=C/[C@@H]1[C@H](C[C@H]1[C@H](c(c1)c2)O)C)O)O)C)O)C</chem>                               | 909                     | Yes              |
| 1946                 | Ansatrienol I                                           | <chem>CO[C@@H]1/C=C/C=C/C(O)C(C)C[C@@H](O)[C@H](C)[C@@H]1/C(=C/Cc2cc(NC(=O)C1)cc(c2)O)C)O</chem>                                       | 910                     | Yes              |
| 1947                 | Mycotrienol II                                          | <chem>CO[C@H]1/C=C/C=C/C=C[C@H](O)[C@H](C)[C@H]1/C(=C/Cc2c(c(NC(=O)C1)cc(O)c2)O)C)O</chem>                                             | 911                     | Yes              |
| 1948                 | 3-O-Demethyltrienomycinol                               | <chem>O[C@H]1/C=C/C=C/C=C[C@H](O)[C@H](C)[C@@H]1/C(=C/Cc2cc(NC(=O)C1)cc(c2)O)C)O</chem>                                                | 912                     | Yes              |
| 1949                 | Trienomycinol                                           | <chem>COC1/C=C/C=C/C(=C/C(C)C)C(C)/C(=C/Cc2cc(NC(=O)C1)cc(c2)O)C)O</chem>                                                              | 912                     | No               |
| 1950                 | Ansatrienol K                                           | <chem>O[C@H]1/C=C/C=C/C[C@H](O)[C@H](C)[C@@H](O)/C(=C/Cc2cc(NC(=O)C1)cc(c2)O)C</chem>                                                  | 913                     | Yes              |
| 1951                 | Acyl-desferrioxamine                                    | <chem>NCCCCCN(C(=O)CCC(=O)NCCCCCN(C(=O)CCC(=O)NCCCCCN(C(=O)CCCC[C@H](CC)C)O)O)O</chem>                                                 | 914                     | Yes              |
| 1952                 | 3-Chloro-6, 8-dihydroxy-8-alpha-lapachone               | <chem>Oc1cc(O)c2c(c1)C(=O)[C@@H]1(C(C2=O)C[C@H](C(O1)(C)C)O)C[C@@H]1[C@@H](C)O)CC[C@@H]1(C1(C)C)Cl</chem>                              | 915                     | Yes              |
| 1953                 | MDN-0170                                                | <chem>Oc1cc(O)c2c(c1)C(=O)[C@H]1(C(=C[C@@H](C(O1)(C)C)O)C2=O)C[C@@H]1[C@@H](C)O)CC[C@@H]1(C1(C)C)Cl</chem>                             | 915                     | No               |
| 1954                 | 27-Oxomilbemycin alpha 31                               | <chem>CC[C@H]1O[C@H]2(CC[C@H]1C)C[C@@H]1C[C@H](O2)C/C=C(\C)/C[C@@H]1(C)C=C/C=C2/c3c(C(=O)O1)cc(C)c(c3OC2=O)O</chem>                    | 916                     | Yes              |
| 1955                 | 13alpha-O-alpha-L-Oleandrosyl-25-ethyl milbemycin beta3 | <chem>CO[C@H]1CC(O)[C@H](OC1C[C@H]1/C(=C/C[C@H]2CC(OC(=O)c3c/C=C/C=C/[C@H]1C)C)cc(O)c(c3)C)C[C@H]1(O2)CC[C@H]1([C@@H](O1)CC)C)C</chem> | 917                     | No               |

| Comp No <sup>a</sup> | Name                                                           | SMILES <sup>b</sup>                                                                                                                                                                                                     | Cluster No <sup>c</sup> | Rep <sup>d</sup> |
|----------------------|----------------------------------------------------------------|-------------------------------------------------------------------------------------------------------------------------------------------------------------------------------------------------------------------------|-------------------------|------------------|
| 1956                 | 13alpha-O-alpha-L-Oleandrosyl milbemycin beta3                 | <chem>CO[C@H]1CC(O)[C@H](OC1C[C@@H]1[C@H](C)/C=C/C(=O)/C2CC(O)c(cc2C(=O)OC2C[C@H](C)/C=C/C(=O)O[C@H]1(C2)CC[C@H]([C@H](O1)C)C)C</chem>                                                                                  | 917                     | Yes              |
| 1957                 | 13alpha-O-alpha-L-Oleandrosyl-25-isopropyl milbemycin beta3    | <chem>CO[C@H]1CC(O)[C@H](OC1C[C@H]1C(=C/C[C@H]2CC(OC(=O)c3c(C(=C/C=C/[C@H]1C)/C)cc(O)c(c3)C)C[C@H]1(O2)CC[C@H]([C@H](O1)C(C)C)C)C</chem>                                                                                | 917                     | No               |
| 1958                 | 13-alpha-Hydroxy milbemycin beta-3                             | <chem>O[C@H]1C(=C/C[C@H]2C[C@H](OC(=O)c3c(C(=C/C=C/[C@H]1C)/C)cc(O)c(c3)C)C[C@H]1(O2)CC[C@H]([C@H](O1)C)C)C</chem>                                                                                                      | 918                     | No               |
| 1959                 | 13-alpha-Hydroxy-25-ethyl milbemycin beta-3                    | <chem>CC[C@H]1O[C@H]2(CC[C@H]1C)C[C@H]1C[C@H](O2)C/C=C(=O)/[C@H](O)[C@H](C)/C=C/C(=O)/C2C(=O)O1cc(C)c(c2)O)C</chem>                                                                                                     | 918                     | Yes              |
| 1960                 | 13-alpha-Hydroxy-4-ethyl milbemycin beta-3                     | <chem>CCc1cc2C(=O)O[C@H]3C[C@H](C/C=C/[C@H]([C@H](C=C/C(=O)/C2cc1O)C)C)O)C)O[C@H]1(C3)CC[C@H]([C@H](O1)C)C</chem>                                                                                                       | 918                     | No               |
| 1961                 | Complestatin B                                                 | <chem>Oc1ccc(cc1)C(C(=O)O)NC(=O)C1Cc2ccc(cc2)Oc2cc3C(C(=O)NC(C(=O)N1C)c1cc(Cl)c(c(c1)Cl)O)NC(=O)C(NC(=O)C(NC(=O)C(=O)c1cc(Cl)c(c(c1)Cl)O)CC1(c4ccc(c(c2O)c3)cc4NC1=O)O)c1cc(Cl)c(c(c1)Cl)O</chem>                       | 919                     | Yes              |
| 1962                 | Complestatin A                                                 | <chem>Oc1ccc(cc1)C(C(=O)O)NC(=O)C1Cc2ccc(cc2)Oc2cc3C(C(=O)NC(C(=O)N1C)c1cc(Cl)c(c(c1)Cl)O)NC(=O)C(NC(=O)C(CC1c4ccc(c(c2O)c3)cc4NC1=O)NC(=O)C(=O)c1cc(Cl)c(c(c1)Cl)O)c1cc(Cl)c(c(c1)Cl)O</chem>                          | 920                     | Yes              |
| 1963                 | Complestatin M55                                               | <chem>Oc1ccc(cc1)[C@H](C(=O)O)NC(=O)[C@H]1Cc2ccc(cc2)Oc2cc([C@H](C(=O)N[C@H](C(=O)N1C)c1cc(Cl)c(c(c1)Cl)O)NC(=O)[C@H](c1cc(Cl)c(c(c1)Cl)O)NC(=O)[C@H](Cc1c[nH]c3c1cccc3)NC(=O)C(=O)c1cc(Cl)c(c(c1)Cl)O)ccc2O</chem>     | 921                     | Yes              |
| 1964                 | Complestatin S56                                               | <chem>Oc1ccc(cc1)[C@H](C(=O)N[C@H](C(=O)N[C@H](C(=O)N[C@H](c1ccc(cc1)O)C(=O)O)Cc1ccc(cc1)O)C)c1cc(Cl)c(c(c1)Cl)O)NC(=O)[C@H](c1cc(Cl)c(c(c1)Cl)O)NC(=O)[C@H](Cc1c[nH]c2c1cccc2)NC(=O)C(=O)c1cc(Cl)c(c(c1)Cl)O</chem>    | 922                     | Yes              |
| 1965                 | Isocomplestatin                                                | <chem>Oc1ccc(cc1)[C@H](C(=O)O)NC(=O)[C@H]1Cc2ccc(cc2)Oc2cc3[C@H](C(=O)N[C@H](C(=O)N1C)c1cc(Cl)c(c(c1)Cl)O)NC(=O)[C@H](NC(=O)[C@H](NC(=O)C(=O)c1cc(Cl)c(c(c1)Cl)O)Cc1c4cc(c(c2O)c3)cc4[nH]c1)c1cc(Cl)c(c(c1)Cl)O</chem>  | 923                     | Yes              |
| 1966                 | Complestatin                                                   | <chem>Oc1ccc(cc1)[C@H](C(=O)O)NC(=O)[C@H]1Cc2ccc(cc2)Oc2cc3[C@H](C(=O)N[C@H](C(=O)N1C)c1cc(Cl)c(c(c1)Cl)O)NC(=O)[C@H](NC(=O)[C@H](NC(=O)C(=O)c1cc(Cl)c(c(c1)Cl)O)Cc1c4ccc(c(c2O)c3)cc4[nH]c1)c1cc(Cl)c(c(c1)Cl)O</chem> | 924                     | Yes              |
| 1967                 | Chloropeptin I                                                 | <chem>Oc1ccc(cc1)C(C(=O)O)NC(=O)C1Cc2ccc(cc2)Oc2cc3C(C(=O)NC(C(=O)N1C)c1cc(Cl)c(c(c1)Cl)O)NC(=O)C(NC(=O)C(NC(=O)C(=O)c1cc(Cl)c(c(c1)Cl)O)Cc1c4cc(c(c2O)c3)ccc4)[nH]c1)c1cc(Cl)c(c(c1)Cl)O</chem>                        | 925                     | Yes              |
| 1968                 | Geralcin C                                                     | <chem>CCCCC[N+](=NC(CO)C(=O)N/C=C\CCCC)NC(=O)C[O-]</chem>                                                                                                                                                               | 926                     | Yes              |
| 1969                 | FL-120A                                                        | <chem>CC(C)C(=O)O[C@H]1([C@H]([C@H](C2=C([C@H]1OC(=O)C)C(=[N+]=[N-])C3=C2C(=O)C4=C(C3=O)C(=CC=C4)O)OC(=O)C)C</chem>                                                                                                     | 927                     | Yes              |
| 1970                 | L-Rhodinose-L-rhodinose-2-deoxy-L-fucose -beta-rhodomyconone   | <chem>CC[C@@]1(O)CC(OC2CC(O)C(C(O2)C)OC2CCC(C(O2)C)OC2CCCC(O2)C)C2=C(O)C3C(C(=C2C1)O)C(=O)c1c(C3=O)c(O)ccc1</chem>                                                                                                      | 928                     | No               |
| 1971                 | L-Rhodinose-L-rhodinose-L-rhodinose-beta-rhodomyconone         | <chem>CC[C@@]1(O)CC(OC2CC(O)C(C(O2)C)OC2CCC(C(O2)C)OC2CCC(C(O2)C)OC2CCC(C(O2)C)O)C2=C(O)C3C(C(=C2C1O)O)C(=O)c1c(C3=O)c(O)ccc1</chem>                                                                                    | 928                     | No               |
| 1972                 | L-Rhodinose-2-deoxy-L-fucose-L-rhodinose-epsilon-rhodomyconone | <chem>COC(=O)C1C2=C(O)C3C(C(=C2C(C[C@]1(O)CC)OC1CCC(C(O1)C)OC1CC(O)C(C(O1)C)OC1CCC(C(O1)C)O)C(=O)c1c(C3=O)cccc1O</chem>                                                                                                 | 928                     | No               |
| 1973                 | L-Rhodinose-2-deoxy-L-fucose-L-rhodinose-beta-rhodomyconone    | <chem>OCC1C2=C(O)C3C(C(=C2C(C[C@]1(O)CC)OC1CCC(C(O1)C)OC1CC(O)C(C(O1)C)OC1CCC(C(O1)C)O)C(=O)c1c(C3=O)cccc1O</chem>                                                                                                      | 928                     | No               |
| 1974                 | L-Cinerulose-2-deoxy-L-fucose- L-rhodinose-beta-rhodomyconone  | <chem>CC[C@@]1(O)CC(OC2CCC(C(O2)C)OC2CC(O)C(C(O2)C)OC2CCC(=O)C(O2)C)C2=C(O)C3C(C(=C2C1O)O)C(=O)c1c(C3=O)c(O)ccc1</chem>                                                                                                 | 928                     | Yes              |
| 1975                 | Deoxycosmomycin C                                              | <chem>CC[C@@]1(O)C[C@H](OC2OC(C)C(C(C2)N(C)C)OC2CCC(C(O2)C)OC2CCC(C(O2)C)O)C2=C(O)C3C(C(=C2[C@H]1OC1OC(C)C(C(C1)N(C)C)OC1CCC(C(O1)C)OC1CCC(C(O1)C)O)C(=O)c1c(C3=O)c(O)ccc1</chem>                                       | 929                     | Yes              |
| 1976                 | A-83094A                                                       | <chem>CC/C(=C/C=C/[C@H]1C=C[C@H]2[C@H]([C@@H]1C(=O)c1ccc[nH]1)CCC2)/[C@@H]1O[C@H](C[C@H]1C)[C@H](C(=O)O)C</chem>                                                                                                        | 930                     | Yes              |
| 1977                 | 16-Deethylindanomycin methyl ester                             | <chem>CC/C(=C/C=C/[C@H]1C=C[C@H]2[C@H]([C@H]1C(=O)c1ccc[nH]1)CCC2)/C1O[C@@H](CC[C@H]1C)[C@H](C(=O)OC)C</chem>                                                                                                           | 930                     | No               |
| 1978                 | 16-Deethylindanomycin                                          | <chem>CC/C(=C/C=C/[C@H]1C=CC2C([C@@H]1C(=O)c1ccc[nH]1)CCC2)/[C@@H]1OC(CC[C@H]1C)[C@H](C(=O)O)C</chem>                                                                                                                   | 930                     | No               |



| Comp No <sup>a</sup> | Name                | SMILES <sup>b</sup>                                                                                                        | Cluster No <sup>c</sup> | Rep <sup>d</sup> |
|----------------------|---------------------|----------------------------------------------------------------------------------------------------------------------------|-------------------------|------------------|
| 1979                 | Antibiotic X 14547  | <chem>CC/C(=C\C=C/[C@H]1C=CC2C([C@@H]1C(=O)c1[nH]ccc1)CC[C@@H]2CC)/[C@@H]1OC(CC[C@@H]1C)[C@H](C(=O)O)C</chem>              | 930                     | No               |
| 1980                 | 66513-28-8          | <chem>CC/C(=C\C=C/[C@@H]1C=C[C@H]2[C@H]([C@@H]1C(=O)c1[nH]ccc1)CC[C@@H]2CC)/[C@@H]1O[C@H](CC[C@@H]1C)[C@H](C(=O)O)C</chem> | 930                     | No               |
| 1981                 | Auroramycin aglycon | <chem>CC(C/C/1=C/C(=C/C=C/C=C/[C@@](C)(O)[C@@H](O)/C=C\C=C(=C\C=C(=C\C=C/[C@@H](NC1=O)C)\C)/C)C</chem>                     | 931                     | Yes              |

<sup>a</sup>Compound names; <sup>b</sup>The simplified molecular-input line-entry system (SMILES); <sup>c</sup>Cluster number according to *Flexophore* descriptor; <sup>d</sup>Representative compound within each cluster.
